# Supplementary material for: A conserved regulator controls asexual sporulation in the fungal pathogen Candida albicans
Source: Nat Commun. 2020 Dec 4;11:6224. doi: 10.1038/s41467-020-20010-9 (PMC7718266; doi:10.1038/s41467-020-20010-9)
Supplement: Supplementary file 4 — Supplementary Data 1 [file 41467_2020_20010_MOESM4_ESM.xlsx]

## Sheet: Table S1 - Strains
Strain name	Organism	Lab identifier	Parental strain	Genotype	Reference
SC5314	C. albicans	CEC1		WT	1
BWP17	C. albicans	CEC31		ura3∆::λimm434/ura3∆::λimm434 arg4∆::hisG/arg4∆::hisG his1∆::hisG/his1∆::hisG	2
BWP17 H+ A+	C. albicans	CEC161	BWP17	ura3∆::λimm434/ura3∆::λimm434 his1∆::hisG/HIS1 arg4∆::hisG/ARG4	Lab collection
BWP17 H+ A+ NIMX	C. albicans	CEC2908	BWP17 H+ A+	ura3∆::λimm434/ura3∆::λimm434 his1∆::hisG/HIS1 arg4∆::hisG/ARG4 ADH1/adh1::PTDH3-carTA::SAT1	3
BWP17 PTET-RME1	C. albicans	CEC5031	CEC2908	BWP17 ADH1/adh1::PTDH3-carTA::SAT1 RPS1/RPS1::CIp10-PTET-RME1	4
BWP17 PTDH3-RME1	C. albicans	CEC4297	CEC161	BWP17 RPS1/RPS1::CIp10-PTDH3-RME1	This study
PTET-GFP-RME1	C. albicans	CEC5252	CEC2908	BWP17 ADH1/adh1::PTDH3-carTA::SAT1 RPS1/RPS1::CIp10-PTET-GFP-RME1	This study
rme1DD	C. albicans	CEC4411	BWP17	ura3∆::λimm434/ura3∆::λimm434 arg4∆::hisG/arg4∆::hisG his1∆::hisG/his1∆::hisG rme1∆::ARG4/rme1∆::HIS1	This study
rme1DD NIMX	C. albicans	CEC4735	CEC4411	ura3∆::λimm434/ura3∆::λimm434 arg4∆::hisG/arg4∆::hisG his1∆::hisG/his1∆::hisG rme1∆::ARG4/rme1∆::HIS1 ADH1/adh1::PTDH3-carTA::SAT1	This study
rme1DD U+	C. albicans	CEC4694	CEC4411	ura3∆::λimm434/ura3∆::λimm434 arg4∆::hisG/arg4∆::hisG his1∆::hisG/his1∆::hisG rme1∆::ARG4/rme1∆::HIS1 RPS1/RPS1::CIp10	This study
SN76	C. albicans	CEC805		ura3∆::λimm434/ura3∆::λimm434 arg4∆::hisG/arg4∆::hisG his1∆::hisG/his1∆::hisG	5
SN76 NIMX	C. albicans	CEC1447	CEC805	ura3∆::λimm434/ura3∆::λimm434 arg4∆::hisG/arg4∆::hisG his1∆::hisG/his1∆::hisG ADH1/adh1::PTDH3-carTA::SAT1	Lab collection
rme1DD arg-uri-	C. albicans	CEC5912	CEC1447	ura3∆::λimm434/ura3∆::λimm434 arg4∆::hisG/arg4∆::hisG his1∆::hisG/his1∆::hisG rme1∆::HIS1/rme1∆::HIS1	Lab collection
rme1DD arg-	C. albicans	CEC5914	CEC1447	ura3∆::λimm434/ura3∆::λimm434 arg4∆::hisG/arg4∆::hisG his1∆::hisG/his1∆::hisG rme1∆::HIS1/rme1∆::HIS1 RPS1/RPS1::CIp10	Lab collection
rme1DD his-	C. albicans	CEC5917	CEC1447	ura3∆::λimm434/ura3∆::λimm434 arg4∆::hisG/arg4∆::hisG his1∆::hisG/his1∆::hisG rme1∆::ARG4/rme1∆::ARG4 RPS1/RPS1::CIp10	Lab collection
SN76 arg-	C. albicans	CEC5919	CEC1447	ura3∆::λimm434/ura3∆::λimm434 arg4∆::hisG/arg4∆::hisG his1∆::hisG/HIS1 RPS1/RPS1::CIp10	Lab collection
SN76 his-	C. albicans	CEC5921	CEC1447	ura3∆::λimm434/ura3∆::λimm434 arg4∆::hisG/ARG4 his1∆::hisG/his1∆::hisG RPS1/RPS1::CIp10	Lab collection
rme1DD PTET-RME1 #1	C. albicans	CEC4741	CEC4735	ura3∆::λimm434/ura3∆::λimm434 arg4∆::hisG/arg4∆::hisG his1∆::hisG/his1∆::hisG rme1∆::ARG4/rme1∆::HIS1 ADH1/adh1::PTDH3-carTA::SAT1 RPS1/RPS1::CIp-PTET-RME1	This study
rme1DD PTET-RME1 #2	C. albicans	CEC4742	CEC4735	ura3∆::λimm434/ura3∆::λimm434 arg4∆::hisG/arg4∆::hisG his1∆::hisG/his1∆::hisG rme1∆::ARG4/rme1∆::HIS1 ADH1/adh1::PTDH3-carTA::SAT1 RPS1/RPS1::CIp-PTET-RME1	This study
rme1DD PTET-RME1 #3	C. albicans	CEC4743	CEC4735	ura3∆::λimm434/ura3∆::λimm434 arg4∆::hisG/arg4∆::hisG his1∆::hisG/his1∆::hisG rme1∆::ARG4/rme1∆::HIS1 ADH1/adh1::PTDH3-carTA::SAT1 RPS1/RPS1::CIp-PTET-RME1	This study
rme1DD PTET-TAP-RME1 #1	C. albicans	CEC4745	CEC4735	ura3∆::λimm434/ura3∆::λimm434 arg4∆::hisG/arg4∆::hisG his1∆::hisG/his1∆::hisG rme1∆::ARG4/rme1∆::HIS1 ADH1/adh1::PTDH3-carTA::SAT1 RPS1/RPS1::CIp-PTET-TAP-RME1	This study
rme1DD PTET-TAP-RME1 #2	C. albicans	CEC4746	CEC4735	ura3∆::λimm434/ura3∆::λimm434 arg4∆::hisG/arg4∆::hisG his1∆::hisG/his1∆::hisG rme1∆::ARG4/rme1∆::HIS1 ADH1/adh1::PTDH3-carTA::SAT1 RPS1/RPS1::CIp-PTET-TAP-RME1	This study
rme1DD PTET-TAP-RME1 #3	C. albicans	CEC4747	CEC4735	ura3∆::λimm434/ura3∆::λimm434 arg4∆::hisG/arg4∆::hisG his1∆::hisG/his1∆::hisG rme1∆::ARG4/rme1∆::HIS1 ADH1/adh1::PTDH3-carTA::SAT1 RPS1/RPS1::CIp-PTET-TAP-RME1	This study
rme1DD PTET-CdRME1	C. albicans	CEC5258	CEC4735	ura3∆::λimm434/ura3∆::λimm434 arg4∆::hisG/arg4∆::hisG his1∆::hisG/his1∆::hisG rme1∆::ARG4/rme1∆::HIS1 ADH1/adh1::PTDH3-carTA::SAT1 RPS1/RPS1::CIp-PTET-CdRME1	This study
rme1DD PTET-CbRME1	C. albicans	CEC5260	CEC4735	ura3∆::λimm434/ura3∆::λimm434 arg4∆::hisG/arg4∆::hisG his1∆::hisG/his1∆::hisG rme1∆::ARG4/rme1∆::HIS1 ADH1/adh1::PTDH3-carTA::SAT1 RPS1/RPS1::CIp-PTET-CbRME1	This study
rme1DD PTET-CtRME1	C. albicans	CEC5262	CEC4735	ura3∆::λimm434/ura3∆::λimm434 arg4∆::hisG/arg4∆::hisG his1∆::hisG/his1∆::hisG rme1∆::ARG4/rme1∆::HIS1 ADH1/adh1::PTDH3-carTA::SAT1 RPS1/RPS1::CIp-PTET-CtRME1	This study
rme1DD PTET-CpRME1	C. albicans	CEC5264	CEC4735	ura3∆::λimm434/ura3∆::λimm434 arg4∆::hisG/arg4∆::hisG his1∆::hisG/his1∆::hisG rme1∆::ARG4/rme1∆::HIS1 ADH1/adh1::PTDH3-carTA::SAT1 RPS1/RPS1::CIp-PTET-CpRME1	This study
Niger12	C. albicans	CEC1424		Clinical isolate	6
EGPURM1	C. albicans	CEC1426		Clinical isolate	7
APRURC3	C. albicans	CEC2018		Clinical isolate	8
Bougn1	C. albicans	CEC3539		Clinical isolate	Lab collection
M11	C. albicans	CEC3620		Clinical isolate	Lab collection
EGPHCRM4 (n°184)	C. albicans	CEC3683		Clinical isolate	Lab collection
322 Robin	C. albicans	CEC4039		Clinical isolate	8
SC5314 CSP1-GFP	C. albicans	CEC4783	CEC1	CSP1/CSP1::GFP-HYGB	This study
SC5314 PPGA55-GFP	C. albicans	CEC4791	CEC1	PGA55/pga55∆::GFP-HYGB	This study
BWP17 PTET-RME1 CSP1-GFP	C. albicans	CEC4827	CEC5031	BWP17 ADH1/adh1::PTDH3-carTA::SAT1 CSP1/CSP1::GFP-HYGB RPS1/RPS1::CIp-PTET-RME1	This study
BWP17 PTET-RME1 PPGA55-GFP	C. albicans	CEC4967	CEC5031	BWP17 ADH1/adh1::PTDH3-carTA::SAT1 PGA55/pga55∆::GFP-HYGB RPS1/RPS1::CIp-PTET-RME1	This study
rme1DD CSP1-GFP	C. albicans	CEC4788	CEC4694	ura3∆::λimm434/ura3∆::λimm434 arg4∆::hisG/arg4∆::hisG his1∆::hisG/his1∆::hisG rme1∆::ARG4/rme1∆::HIS1 CSP1/CSP1::GFP-HYGB RPS1/RPS1::CIp10	This study
rme1DD PPGA55-GFP	C. albicans	CEC4804	CEC4694	ura3∆::λimm434/ura3∆::λimm434 arg4∆::hisG/arg4∆::hisG his1∆::hisG/his1∆::hisG rme1∆::ARG4/rme1∆::HIS1 PGA55/pga55∆::GFP-HYGB RPS1/RPS1::CIp10	This study
rme1DD PTET-RME1 CSP1-GFP	C. albicans	CEC4789	CEC4741	ura3∆::λimm434/ura3∆::λimm434 arg4∆::hisG/arg4∆::hisG his1∆::hisG/his1∆::hisG rme1∆::ARG4/rme1∆::HIS1 ADH1/adh1::PTDH3-carTA::SAT1 CSP1/CSP1::GFP-HYGB RPS1/RPS1::CIp-PTET-RME1	This study
CEC2018 CSP1-GFP	C. albicans	CEC4785	CEC2018	CSP1/CSP1::GFP-HYGB	This study
CEC2018 PPGA55-GFP	C. albicans	CEC4793	CEC2018	PGA55/pga55∆::GFP-HYGB	This study
CEC2018-rme1DD	C. albicans	CEC4801	CEC2018	rme1∆::FRT/rme1∆::SAT1-FLP	This study
CEC2018-rme1DD CSP1-GFP	C. albicans	CEC4805	CEC4801	rme1∆::FRT/rme1∆::SAT1-FLP CSP1/CSP1::GFP-HYGB	This study
CEC2018-rme1DD PPGA55-GFP	C. albicans	CEC4807	CEC4801	rme∆1::FRT/rme1∆::SAT1-FLP PGA55/pga55∆::GFP-HYGB	This study
hog1DD	C. albicans	CEC2098	BWP17	ura3∆::λimm434/ura3∆::λimm434 his1∆::hisG/his1∆::hisG arg4∆::hisG/arg4∆::hisG hog1::loxP-ARG4-ura3-loxP/hog1::loxP-HIS1-loxP	9
hog1DD PTDH3-RME1	C. albicans	CEC4780	CEC2098	ura3∆::λimm434/ura3∆::λimm434 his1∆::hisG/his1∆::hisG arg4∆::hisG/arg4∆::hisG hog1::loxP-ARG4-ura3-loxP/hog1::loxP-HIS1-loxP RPS1/RPS1::CIp-PTDH3-RME1	This study
hog1DD PTDH3-RME1 CSP1-GFP	C. albicans	CEC4898	CEC4780	BWP17 hog1::loxP-ARG4-ura3-loxP/hog1::loxP-HIS1-loxP RPS1/RPS1::CIp10-PTDH3-RME1 CSP1/CSP1::GFP-HYGB	This study
hog1DD PTDH3-RME1 PPGA55-GFP	C. albicans	CEC4899	CEC4780	BWP17 hog1::loxP-ARG4-ura3-loxP/hog1::loxP-HIS1-loxP RPS1/RPS1::CIp10-PTDH3-RME1 PGA55/pga55∆::GFP-HYGB	This study
efg1DD (HLC67)	C. albicans	CEC1439	CAI4	ura3∆::λimm434/ura3∆::λimm434 efg1∆::hisG/efg1∆::hisG	10
efg1DD NIMX	C. albicans	CEC3092	CEC1439	ura3∆::λimm434/ura3∆::λimm434 efg1∆::hisG/efg1∆::hisG ADH1/adh1::PTDH3-carTA::SAT1	Lab collection
efg1DD PTET-RME1	C. albicans	CEC4781	CEC3092	ura3∆::λimm434/ura3∆::λimm434 efg1∆::hisG/efg1∆::hisG ADH1/adh1::PTDH3-carTA::SAT1 RPS1/RPS1::CIp-PTET-RME1	This study
efg1DD PTET-RME1 CSP1-GFP	C. albicans	CEC4809	CEC4781	ura3∆::λimm434/ura3∆::λimm434 efg1∆::hisG/efg1∆::hisG ADH1/adh1::PTDH3-carTA::SAT1 CSP1/CSP1::GFP-HYGB RPS1/RPS1::CIp-PTET-RME1	This study
efg1DD PTET-RME1 PPGA55-GFP	C. albicans	CEC4810	CEC4781	ura3∆::λimm434/ura3∆::λimm434 efg1∆::hisG/efg1∆::hisG ADH1/adh1::PTDH3-carTA::SAT1 PGA55/pga55∆::GFP-HYGB RPS1/RPS1::CIp-PTET-RME1	This study
SC5314 PTDH3-SFL1	C. albicans	CEC5278	CEC1	RPS1/RPS1::CIp10-PTDH3-SFL1	This study
SC5314 sfl1∆∆	C. albicans	CEC5288	CEC1	sfl1∆/sfl1∆::SAT1	This study
SC5314 PTDH3-NDT80	C. albicans	CEC5280	CEC1	RPS1/RPS1::CIp10-PTDH3-NDT80	This study
SC5314 ndt80∆∆	C. albicans	CEC5290	CEC1	ndt80∆/ndt80∆::SAT1	This study
SC5314 PTDH3	C. albicans	CEC5393	CEC1	RPS1/RPS1::CIp10-PTDH3	This study
CEC2018 PTDH3-SFL1	C. albicans	CEC5274	CEC2018	RPS1/RPS1::CIp10-PTDH3-SFL1	This study
CEC2018 sfl1∆∆	C. albicans	CEC5284	CEC2018	sfl1∆/sfl∆::SAT1	This study
CEC2018 PTDH3-NDT80	C. albicans	CEC5276	CEC2018	RPS1/RPS1::CIp10-PTDH3-NDT80	This study
CEC2018 ndt80∆∆	C. albicans	CEC5286	CEC2018	ndt80∆/ndt80∆::SAT1	This study
CEC2018 PTDH3	C. albicans	CEC5292	CEC2018	RPS1/RPS1::CIp10-PTDH3	This study
rme1∆∆ ndt80∆∆	C. albicans	CEC5910	CEC5914	ndt80∆::ARG4/ndt80∆::ARG4	This study
rme1∆∆ nrg1∆∆	C. albicans	CEC5908	CEC5914	nrg1∆::ARG4/nrg1∆::ARG4	This study
nrg1∆∆	C. albicans	CEC1252	CEC1120	ura3∆::λimm434/ura3∆::λimm434 nrg1∆::hisG/nrg1∆::hisG RPS1/RPS1::CIp10	Lab collection
sfl1∆∆	C. albicans	CEC1910	SN76	sfl1∆::ARG4/sfl1∆::HIS1	11
sfl1∆∆ PTDH3	C. albicans	CEC5905	CEC1910	sfl1∆::ARG4/sfl1∆::HIS1 RPS1/RPS1::CIp10-PTDH3	This study
sfl1∆∆ PTDH3-RME1	C. albicans	CEC5900	CEC1910	sfl1∆::ARG4/sfl1∆::HIS1RPS1/RPS1::CIp10-PTDH3-RME1	This study
rme1∆∆ PTDH3	C. albicans	CEC5903	CEC5912	rme1∆::HIS1/rme1∆::HIS1 RPS1/RPS1::CIp10-PTDH3	This study
rme1∆∆ PTDH3-SFL1	C. albicans	CEC5901	CEC5912	rme1∆::HIS1/rme1∆::HIS1 RPS1/RPS1::CIp10-PTDH3-SFL1	This study
SC5314 PRME1-gLUC59	C. albicans	CEC4849	CEC1	RME1/rme1∆::PRME1-gLUC59-HYGB	This study
rme1DD PRME1-gLUC59	C. albicans	CEC4850	CEC4694	ura3∆::λimm434/ura3∆::λimm434 arg4∆::hisG/arg4∆::hisG his1∆::hisG/his1∆::hisG rme1∆::ARG4/rme1∆::PRME1-gLUC59-HYGB RPS1/RPS1::CIp10	This study
CEC2018 PRME1-gLUC59	C. albicans	CEC4870	CEC2018	RME1/rme1D::PRME1-gLUC59-HYGB	This study
CEC2018-rme1DD PRME1-gLUC59	C. albicans	CEC4851	CEC4801	rme1∆::PRME1-gLUC59-HYGB/rme1∆::SAT1-FLP	This study
Wü284	C. dubliniensis	CEC4874		WT	12
rme1∆∆	C. dubliniensis	CEC4876	CEC4874	rme1∆::FRT/rme1∆::SAT1-FLP	This study
CBS9895	C. buenavistaensis	CEC4661		WT	13
rme1∆∆	C. buenavistaensis	CEC5282	CEC4661	rme1∆/rme1∆::SAT1	This study
NEM_7114236	C. tropicalis	CEC1037		WT	14
NEM_7103546	C. parapsilosis	CEC1034		WT	14
