# Supplementary material for: A conserved regulator controls asexual sporulation in the fungal pathogen Candida albicans
Source: Nat Commun. 2020 Dec 4;11:6224. doi: 10.1038/s41467-020-20010-9 (PMC7718266; doi:10.1038/s41467-020-20010-9)
Supplement: Supplementary file 5 — Supplementary Data 2 [file 41467_2020_20010_MOESM5_ESM.xlsx]

## Sheet: Table S2 - Primers
Primer name	5' - 3' sequence *
RME1-KO-F	AAATTATTCAGATTCATATTCTCCTTTGTCTTTGGAAAGCTTATTTTCTTTTTGTTATTTCAGTTCAGTTCAGTCTACTGCCCCTTCCATTTCCTCTCCTTagctcggatccactagtaacg
RME1-KO-R	CATAAAAAAAAAATAAAATAAAAAAATAAAAACTTTTTCTGTTTTAATACCGAAAACTTGATTCTTTTCCCGTATAATGTTGGAGGACGAAAGGAACTAccagtgtgatggatatctgca
RME1-KO-FLIP-F-PROM	AGGCTCGTTCTGGTACCCTCCACCACCACCATTAGAG
RME1-KO-FLIP-R-PROM	GCTGATTACACTCGAGGGAAAGGAGAGGAAATGGAA
RME1-KO-FLIP-F-TER	AGGCTCGTTCTGCGGCCGCTTCCTTTCGTCCTCCAAC
RME1-KO-FLIP-R-TER	GTCATCGTTAGAGCTCCAACCATAGAAGTATGACAACCAT
RME1-KO-DETECT-F	CACACACCCATTTTCTTATCCAACT
RME1-KO-DETECT-R	GCCAATAAGCTAGTGAATGCAAAATATG
RME1-500-F	AATCGAGAATTCTGGCTGTA
RME1-500-R	GGAAGTTGGAATGATTGGTA
RME1-FLIP-VERIFY-KO-F	CAACTATTCACACCATATTCAATTT
RME1-FLIP-VERIFY-KO-R	CTATTACTTGTTTTCTCAATGTCGA
RME1-VERIFY-LOCUS-F	GCTCACCATGAACAGTTTTAGA
RME1-VERIFY-LOCUS-R	CAACATACAGCCTCTGTCGAAC
ORF19.654_F_CHIPPCR	GTGTTGAATATGGAGCAAGGAATGG
ORF19.654_R_CHIPPCR	CCAACAACCCATTTGAACAACTCAT
CSP1_F_CHIPPCR	GGTTTGCTTACTCTTTAGTCCAACACATC
CSP1_R_CHIPPCR	TGCATTGGTGGTGTGTAATAGCTTG
PGA55_F_CHIPPCR	ATCGAATCCGATCAAGGCTTATAC
PGA55_R_CHIPPCR	TGCAATCTTTGTGCTTAGTCTATCG
CSP2_F_CHIPPCR	ATATCGAACCCGTGTTTCTTGAATG
CSP2_R_CHIPPCR	TGGATGGGACTAGAATGATGAGGTG
FEN1_F_CHIPPCR	CGATGACTATTGAGTGAGTGGGTGA
FEN1_R_CHIPPCR	TCGTGTGGAAGCGACATTAAATTG
ORF19.7250_F_CHIPPCR	GTGGGTAGTGTCTGACATGGACCTC
ORF19.7250_R_CHIPPCR	ACATTCTCGGCACGATGTGATTTAT
ORF19.654_F_qPCR	GCGATGATGATGACTGTGAAGATGA
ORF19.654_R_qPCR	AGTGCCAGAATTTGATCTTGTGGTC
CSP1_F_qPCR	CTGATTGCGACTTGCTCATTACCTT
CSP1_R_qPCR	CCCTTTGTCGTCAACTTTACAATGC
PGA55_F_qPCR	TTACCAAGACGGTTGAAGTTGGAAA
PGA55_R_qPCR	TATGTATTGCATCCACCTTCGGAAC
CSP2_F_qPCR	CTTTGGCTGTTAAAGAATGGAAGCA
CSP2_R_qPCR	TCGTCACCACGTTTAGCAAAGTAAA
FEN1_F_qPCR	AGTTTGGTGGAAAGAATGGGTCACT
FEN1_R_qPCR	GCAGCAATCATAGTACCAGCACAATC
ORF19.7250_F_qPCR	CACCACAACAAGAGCAACAACAAGA
ORF19.7250_R_qPCR	TCATAAGCATTTGGTTTGGGTATGC
ORF19.4463_F_qPCR	AACGTGGTGGTTATGGTAGTGAACG
ORF19.4463_R_qPCR	ACAATTTCACCAGTGGCATGTCTATC
ORF19.555_F_qPCR	GCGATGATGATGACTGTGAAGATGA
ORF19.555_R_qPCR	AGTGCCAGAATTTGATCTTGTGGTC
GAL7_F_qPCR	ATGATTATCCTGCTGTGAGGTTGGA
GAL7_R_qPCR	GCCAAGCATTCACCACATTATTGAT
ORF19.6660_F_qPCR	ACCACCTGCATATAAACCGGCTATT
ORF19.6660_R_qPCR	GGCTAAACGTGACAAGCTGATGTTC
MAC1_F_qPCR	TTGTTAGGTACAATTCCAGA
MAC1_R_qPCR	GATAAAGATGTTAGCAACGT
TEF3-F	CAAGAAATGTCCATCTGCTCAATC
TEF3-R	TGTTTAGTTTTAACCCCTTCCAAGA
ACT1-F	TATGAAAGTTAAGATTATTGCTCCACCAGAAA
ACT1-R	GGAAAGTAGACAATGAAGCCAAGATAGAAC
SFL1_F_qPCR	TGCTCCAACCACCATGATAA
SFL1_R_qPCR	CCCGTCAAAGATACCACTGAA
NRG1_F_qPCR	GTGTTCGAGATCGTTTACTACTTCA
NRG1_R_qPCR	CTAAAGTCCTGTGTTGTTGTCTGTT
PSFS1-VERIFY-F	CTCTGATGAAGACTCTGCTTGC
SAP2-VERIFY-R	CAGGCAACAGGAGAGGTTATG
F-UPSTREAM-CSP1	cagcttaaagtctgtgttaaaaaaaGGGCTTAAGAATCCACTTTAG
R-UPSTREAM-CSP1	tgcttttttgtacaaacttgttgatATCGTAATGACAAGTTGAGTTGTTG
F-DOWNSTREAM-CSP1	ctccagtcacccgcggccgccaccgATCGTGTTTCAAGACTGGTTTTG
R-DOWNSTREAM-CSP1	tatagggcgaattggagctccaccaGTTAGGTCCACCAACAATCATGA
CPS1-GFP-VERIF-F	GAGAAAATTTATTTTGCCTGGA
CSP1-GFP-VERIF-R	GTTCTTGCGTCTAAATCAGCAT
HYGRO-VERIF-F	GATCAATTGTATCAATCTTTGGTTG
GFP-VERIF-R	CTTCTCCTTTAGAAGCACCTGC
F-PrPGA55	ttaaagtctgtgttaaaaaaagggcTTAAATCGTGATACCAATTTGT
R-PrPGA55	gcgccagcaccctgcagcgtacGCATCCTTTTGTTTTTATTGGGAATTG
F-TERPGA55	gttccttgcgcagctgtgctcgacgTTTTTTCTTATGCTTTTTCGTTG
R-TERPGA55	ttggagctccaccacggtggcggccGAACATCAATTATACCTTTAGAG
PGA55-GFP-VERIF-F	GTCTAGCTCAATAGTAGAACTGTGACT
PGA55-GFP-VERIF-R	CATGTTCCCTTACATCTTGAGA
CIP-UR	ATTACTATTTACAATCAAAGGTGGTC
CIP-UL	ATACTACTGAAAATTTCCTGACTTTC
CdHIS1-DETECT-F	AATGCTGCAGCTTATTGAGCGGTG
CdHIS1-DETECT-R	TGCCCTTCTACCTGGAGTAATGGT
CdARG4-DETECT-F	CCAGATAACTGACCAAACACTCTGCC
CdARG4-DETECT-R	CTGGTAGATCCAGAAATGATCAAGTTGC
CdRMEDF	TATCCACTTTATTTAACACACACTTGTCAATAACACATATAAAGCTAGACAAATTTTCCAGTTGTCTTCTCAATTTTAAGTTTTCCACTTTCAGTACTTGGTAAACGACGGCCAGT
CdRMEDR	AAGAAGTTTCCTCCCATAAGTATGGTATTACCAACCAACCAGCCAACGAATGAATGAATGAATGAATGACAAATGGAGAATTGAATTGAATTGTAAAGGAAACAGCTATGACCATG
CdRMEUP	CACCGTAAACATACATTCATT
CdRMEDN	TACCAACCAACCAGCCAACG
CdRMEINTF	CATGAGCCAACTTCAACACCAT
CdRMEINTR	CCAATCATATTCATAGGACAC
Cd-GTW-RME1fwd	GGGGACAAGTTTGTACAAAAAAGCAGGCTTGATGTTTTCTTATAATTTAGAGTCCAATAATG
Cd-GTW-RME1rev	GGGGACCACTTTGTACAAGAAAGCTGGGTCACTCCTAGATTTTTTAATTGCCTTATCATC
Cb-GTW-RME1fwd	GGGGACAAGTTTGTACAAAAAAGCAGGCTTGATGCTTGCTTATACTTCTGATTCAAAAGAAC
Cb-GTW-RME1rev	GGGGACCACTTTGTACAAGAAAGCTGGGTCATTTTTAGTTTTTTTAGATAAAGATTTATC
Ct-GTW-RME1fwd	GGGGACAAGTTTGTACAAAAAAGCAGGCTTGATGGTTGGTTATAACTTGATAGAATCTAATTC
Ct-GTW-RME1rev	GGGGACCACTTTGTACAAGAAAGCTGGGTCTGCATGATTCTTATTAATTCTTCTTCTTC
Cp-GTW-RME1fwd	GGGGACAAGTTTGTACAAAAAAGCAGGCTTGATGTCTCCATTAACTGCAATTTTGCAATC
Cp-GTW-RME1rev	GGGGACCACTTTGTACAAGAAAGCTGGGTCAATAACTTTTTTTCTTCTCTTTAATGTGG
SNR52/R_SFL1	TCTCAATCATCCCTTCCAGTCAAATTAAAAATAGTTTACGCAAGTC
SNR52/R_NDT80	CAACCAACACCACAACCTTTCAAATTAAAAATAGTTTACGCAAGTC
SNR52/R_RME1_Cb	TGAGGAATATTTAAGGCAGCCAAATTAAAAATAGTTTACGCAAGTC
SNR52/R_NRG1	CAGCTTCTATAATTGACGGTCAAATTAAAAATAGTTTACGCAAGTC
SgRNA/F_SFL1	ACTGGAAGGGATGATTGAGAGTTTTAGAGCTAGAAATAGCAAGTTAAA
SgRNA/F_NDT80	AAAGGTTGTGGTGTTGGTTGGTTTTAGAGCTAGAAATAGCAAGTTAAA
SgRNA/F_RME1_Cb	GCTGCCTTAAATATTCCTCAGTTTTAGAGCTAGAAATAGCAAGTTAAA
SgRNA/F_NRG1	ACCGTCAATTATAGAAGCTGGTTTTAGAGCTAGAAATAGCAAGTTAAA
SFL1_repair/F	ATTGTTAATCTATTGTTAATTTCTTCTCCCCCTAAATTACCTACATATAAACAACGTTAAAACAGACATCAACACAAACTagtctaatcacttGCGGCCGC
SFL1_repair/R	TATATAAAACTACTACTTCTATAACATGATACACATACATAAGAATTTAACTTTGTAAAACATAGTGTCATTTTTTCAAGggaccacctttgattgtaaatag
NDT80_repair/F	AACAACAACAACAGCAACACCACCACCAGCTTCCTCACCATCCTATTCACTATCATGGTATTGCTCAGCAACAACAGTCCagtctaatcacttGCGGCCGC
NDT80_repair/R	AATAAGATTACTATTACAAATAAAAGCTTTATATATGTATCAGTGTATATATTTTGTGATCTTTTGTGTAATTATAATACggaccacctttgattgtaaatag
RME1_Cb_repair/F	TGATTTTTTATTTGCATAGTTTATTTTCATTATAAAAACAACAATTATAAATATATATATATACATATATATATAagtctaatcacttGCGGCCGC
RME1_Cb_repair/R	AGTGTTTTCATTTTTAATACAAATGATAGCGACGACCTTATTAAAATATATAAGTTTTTTTTATAATTTTATACTggaccacctttgattgtaaatag
NRG1_SN_repair/F	GGTATTATATAAATAACAATAAAACATCGTTATCCTGTTTCTCATCTCAAAATTTTTCCCTGCTAGTTTCATTAAGAATCagctcggatccactagtaacg
NRG1_SN_repair/R	CCAGTAACCATAACAAAAAAAAACTAAACCCAAGCAATTAACCATCCAAATTTAACCCGTTTTATAATACAATTTTGaccagtgtgatggatatctgc
NDT80_SN_repair/F	AACAACAACAACAGCAACACCACCACCAGCTTCCTCACCATCCTATTCACTATCATGGTATTGCTCAGCAACAACAGTCCagctcggatccactagtaacg
NDT80_SN_repair/R	AATAAGATTACTATTACAAATAAAAGCTTTATATATGTATCAGTGTATATATTTTGTGATCTTTTGTGTAATTATAATACaccagtgtgatggatatctgc
ColoORF_SFL1/F	CACCGACTTCTCATCCAATG
ColoORF_SFL1/R	TGTCCTGGTATATGTGGTGC
ColoORF_NDT80/F	CCAACACCTCAGCAGCCAC
ColoORF_NDT80/R	CAGAACACTTGGCCACTAAC
ColoORF_RME1_Cb/F	GACTGAAAGTATTGATCAACAAC
ColoORF_RME1_Cb/R	ATTCTTTCTAATAACCGAACAG
ColoORF_NRG1/F	CAATTTGGATCCCATCTATACTAGGC
ColoORF_NRG1/R	GGCCTC GAGCATTATGCTTTATCAACAATCA
GLUC-VERIFY-R	TAACAACGGTGGTAGCAATG
CAHYGB-DETECT2-R	CAGATAAGTTTCAGGTTTGC
MTLa1-F	ACCTGCATGAAGAAACAG
MTLa1-R	CCTTAGTAGAATTGTCTAGTC
MTLalpha2-F	GAATTCACATCTGGAGG
MTLalpha2-R	CAAAGCAGCCAACTCAGG
* lowercase: nucleotides hybridizing to a plasmid sequence
