# Supplementary material for: A conserved regulator controls asexual sporulation in the fungal pathogen Candida albicans
Source: Nat Commun. 2020 Dec 4;11:6224. doi: 10.1038/s41467-020-20010-9 (PMC7718266; doi:10.1038/s41467-020-20010-9)
Supplement: Supplementary file 6 — Supplementary Data 3 [file 41467_2020_20010_MOESM6_ESM.xlsx]

## Sheet: Table S3 upper peaks rep1
#rank	chromosome	start	end	region_length	maxFC(log2)	position_of_maxFC	FDR
1	Ca20chr3	496369	497052	684	5.423816	496659	0.000000
2	Ca20chr2	1158174	1159060	887	5.337784	1158423	0.000000
3	Ca20chr2	1673513	1674160	648	5.243727	1673783	0.000000
4	Ca20chrR	1151820	1153151	1332	5.238806	1153034	0.000000
5	Ca20chr3	186174	187161	988	5.301067	186608	0.000000
6	Ca20chr7	454749	455462	714	5.662020	455030	0.000000
7	Ca20chrR	606238	607001	764	5.481223	606690	0.000000
8	Ca20chr3	1509138	1509781	644	5.610427	1509464	0.000000
9	Ca20chr1	2347072	2348196	1125	5.084026	2347701	0.000000
10	Ca20chr1	230910	231980	1071	5.108753	231586	0.000000
11	Ca20chrR	1812197	1812920	724	5.015021	1812661	0.000000
12	Ca20chr2	1133612	1135023	1412	4.900987	1134756	0.000000
13	Ca20chr1	1550253	1550831	579	5.071164	1550628	0.000000
14	Ca20chr1	349330	349998	669	4.784861	349582	0.000000
15	Ca20chr1	2952738	2954061	1324	5.435232	2953222	0.000000
16	Ca20chr1	2423773	2424576	804	4.877305	2424419	0.000000
17	Ca20chr1	945935	946953	1019	4.641374	946633	0.000000
18	Ca20chrR	1635640	1636073	434	5.295757	1636073	0.000000
19	Ca20chr2	1829505	1831554	2050	4.872484	1830807	0.000000
20	Ca20chr3	263607	264624	1018	4.760697	264382	0.000000
21	Ca20chr3	1072514	1073537	1024	4.556929	1072851	0.000000
22	Ca20chr1	600300	600878	579	5.287411	600673	0.000000
23	Ca20chr5	854940	855957	1018	5.123213	855689	0.000000
24	Ca20chr7	113767	114975	1209	5.280286	114472	0.000000
25	Ca20chr4	532338	533079	742	5.714118	532631	0.000000
26	Ca20chr2	439357	440666	1310	5.012106	440266	0.000000
27	Ca20chr2	1614340	1615086	747	5.225964	1614761	0.000000
28	Ca20chr1	1831919	1832942	1024	4.534202	1832289	0.000000
29	Ca20chr1	66442	67265	824	4.741713	66981	0.000000
30	Ca20chr4	478270	479284	1015	4.591589	478877	0.000000
31	Ca20chr1	2244287	2245118	832	5.221331	2244636	0.000000
32	Ca20chr3	1349056	1351172	2117	4.589247	1350394	0.000000
33	Ca20chr5	279821	280454	634	4.572400	280203	0.000000
34	Ca20chr3	742856	743577	722	5.144658	743118	0.000000
35	Ca20chrR	1722143	1723399	1257	4.632628	1722929	0.000000
36	Ca20chrR	2161910	2162943	1034	4.887458	2162565	0.000000
37	Ca20chrR	1904498	1904943	446	4.823931	1904609	0.000000
38	Ca20chr7	451823	454129	2307	5.107058	452505	0.000000
39	Ca20chrR	1370470	1371111	642	5.231871	1370888	0.000000
40	Ca20chr2	1456522	1457339	818	4.687440	1456822	0.000000
41	Ca20chr3	710002	710960	959	5.209070	710607	0.000000
42	Ca20chr4	983468	984283	816	4.955225	983955	0.000000
43	Ca20chrR	1115839	1116429	591	4.591717	1116283	0.000000
44	Ca20chrR	1835441	1836105	665	4.661475	1835819	0.000000
45	Ca20chr5	653984	656029	2046	5.340347	654417	0.000000
46	Ca20chrR	1165879	1166827	949	4.460901	1166632	0.000000
47	Ca20chr1	1577262	1577827	566	4.508711	1577575	0.000000
48	Ca20chr1	370629	371322	694	4.665385	371032	0.000000
49	Ca20chr3	235178	235696	519	4.529504	235575	0.000000
50	Ca20chrR	299441	300267	827	4.657229	299926	0.000000
51	Ca20chr6	348320	349966	1647	4.292257	348900	0.000000
52	Ca20chr6	290078	291751	1674	4.857120	290891	0.000000
53	Ca20chrR	655412	655892	481	4.909219	655571	0.000000
54	Ca20chr3	919573	920228	656	4.913096	919933	0.000000
55	Ca20chrR	77345	78301	957	4.482678	78126	0.000000
56	Ca20chr7	828740	829462	723	4.536708	829007	0.000000
57	Ca20chrR	74750	75354	605	4.906538	75048	0.000000
58	Ca20chr4	172585	172969	385	4.720918	172852	0.000000
59	Ca20chr6	288868	289360	493	5.676039	289102	0.000000
60	Ca20chrR	1891814	1892382	569	4.611845	1891883	0.000000
61	Ca20chrR	1584788	1585182	395	4.962131	1585019	0.000000
62	Ca20chr2	1015026	1015685	660	4.668919	1015255	0.000000
63	Ca20chr2	1841590	1842497	908	4.547317	1842206	0.000000
64	Ca20chrR	613847	615770	1924	4.717485	615250	0.000000
65	Ca20chr7	599779	600836	1058	4.087159	600464	0.000000
66	Ca20chr2	2051532	2052003	472	5.385573	2051795	0.000000
67	Ca20chr1	2568150	2570005	1856	4.527635	2568369	0.000000
68	Ca20chr4	1337178	1337851	674	4.559972	1337521	0.000000
69	Ca20chr1	410370	411268	899	4.613993	411069	0.000000
70	Ca20chr4	555323	555734	412	4.562818	555440	0.000000
71	Ca20chr2	2135678	2136524	847	4.575168	2135808	0.000000
72	Ca20chr2	315527	316294	768	4.726403	315713	0.000000
73	Ca20chr2	1284111	1284824	714	4.626670	1284363	0.000000
74	Ca20chr2	1917723	1919014	1292	4.523369	1919014	0.000000
75	Ca20chr1	355646	356818	1173	4.377901	356503	0.000000
76	Ca20chr1	523778	524461	684	4.817823	524111	0.000000
77	Ca20chr3	1215835	1216650	816	4.094266	1216307	0.000000
78	Ca20chr5	580316	580982	667	4.771339	580552	0.000000
79	Ca20chr2	994416	994819	404	4.629841	994819	0.000000
80	Ca20chr1	1459419	1459958	540	4.995843	1459685	0.000000
81	Ca20chr4	1325694	1328023	2330	4.248083	1326746	0.000000
82	Ca20chr3	208356	209075	720	4.194378	208632	0.000000
83	Ca20chr1	1083960	1084741	782	4.192808	1084243	0.000000
84	Ca20chr7	478369	478635	267	4.125205	478518	0.000000
85	Ca20chr2	2106817	2107863	1047	4.616843	2107112	0.000000
86	Ca20chr7	700857	701401	545	4.489286	701118	0.000000
87	Ca20chr5	1176332	1177143	812	4.614017	1176619	0.000000
88	Ca20chr3	1373476	1374245	770	4.342693	1374129	0.000000
89	Ca20chrR	1987674	1988582	909	4.419091	1988059	0.000000
90	Ca20chr1	2790445	2791426	982	4.619623	2790657	0.000000
91	Ca20chr2	660798	661472	675	4.711437	661176	0.000000
92	Ca20chr4	798203	798487	285	4.291017	798386	0.000000
93	Ca20chr1	1501566	1502064	499	4.079078	1501829	0.000000
94	Ca20chr6	432085	433857	1773	4.353321	432507	0.000000
95	Ca20chr4	625726	626459	734	4.386264	626124	0.000000
96	Ca20chrR	1131396	1131876	481	4.524484	1131667	0.000000
97	Ca20chrR	295743	297002	1260	4.287206	296260	0.000000
98	Ca20chr4	1444211	1445455	1245	4.679199	1445039	0.000000
99	Ca20chr2	1149686	1150316	631	4.346390	1150063	0.000000
100	Ca20chr4	703279	703719	441	4.955586	703627	0.000000
101	Ca20chr5	260035	261046	1012	4.633307	260687	0.000000
102	Ca20chr4	1056627	1057022	396	4.821370	1056843	0.000000
103	Ca20chr2	1103440	1104689	1250	4.417564	1103812	0.000000
104	Ca20chr1	1740491	1741305	815	4.358187	1740726	0.000000
105	Ca20chrR	1727038	1729198	2161	4.585033	1727418	0.000000
106	Ca20chr1	2222414	2223146	733	4.536133	2222684	0.000000
107	Ca20chrR	1532986	1533666	681	4.252175	1533114	0.000000
108	Ca20chr4	401094	402221	1128	4.460449	401795	0.000000
109	Ca20chr3	565363	565654	292	3.794170	565480	0.000000
110	Ca20chrR	176292	176907	616	4.554690	176515	0.000000
111	Ca20chrR	1809943	1810982	1040	4.152559	1810450	0.000000
112	Ca20chr5	101627	102693	1067	4.915449	102189	0.000000
113	Ca20chr2	742620	743279	660	4.820922	742830	0.000000
114	Ca20chr2	1745426	1746048	623	4.602389	1745821	0.000000
115	Ca20chrR	208642	209315	674	4.565325	208891	0.000000
116	Ca20chr1	2196555	2197323	769	4.676850	2196810	0.000000
117	Ca20chr1	624521	625666	1146	4.122494	625017	0.000000
118	Ca20chr4	1109860	1110773	914	4.204200	1110302	0.000000
119	Ca20chr6	911706	912322	617	4.048554	911959	0.000000
120	Ca20chrR	989126	990011	886	4.086594	989526	0.000000
121	Ca20chr1	1996833	1997515	683	4.926863	1997089	0.000000
122	Ca20chr3	791863	792582	720	4.445907	792221	0.000000
123	Ca20chr3	1570721	1571260	540	3.802598	1570927	0.000000
124	Ca20chr7	779642	781022	1381	4.088996	780447	0.000000
125	Ca20chr2	376987	377596	610	4.767031	377151	0.000000
126	Ca20chr4	672029	672716	688	4.773297	672368	0.000000
127	Ca20chrR	1703272	1703757	486	4.176336	1703569	0.000000
128	Ca20chr2	348768	349476	709	4.371641	349125	0.000000
129	Ca20chrR	1073655	1074125	471	4.178169	1073926	0.000000
130	Ca20chr4	573941	574340	400	4.002041	573995	0.000000
131	Ca20chr1	801576	802172	597	4.785867	801969	0.000000
132	Ca20chr3	1550774	1551366	593	4.515616	1551016	0.000000
133	Ca20chr2	162496	163514	1019	3.846590	163193	0.000000
134	Ca20chr5	449440	449969	530	4.806289	449702	0.000000
135	Ca20chr2	1670289	1671016	728	4.113452	1670629	0.000000
136	Ca20chr4	1325036	1325426	391	3.820300	1325270	0.000000
137	Ca20chr3	1273453	1274050	598	4.452405	1273778	0.000000
138	Ca20chrR	1087067	1088410	1344	3.851229	1088299	0.000000
139	Ca20chrR	848110	849161	1052	4.306505	848396	0.000000
140	Ca20chr1	344136	344466	331	3.722864	344211	0.000000
141	Ca20chrR	2265787	2266480	694	4.843412	2266266	0.000000
142	Ca20chr7	724789	725351	563	4.677075	725155	0.000000
143	Ca20chr2	1363998	1365146	1149	4.098511	1364510	0.000000
144	Ca20chr4	8109	8847	739	3.863960	8365	0.000000
145	Ca20chr2	1231715	1232302	588	3.796892	1232302	0.000000
146	Ca20chr1	468270	468731	462	4.970559	468535	0.000000
147	Ca20chr1	34689	36214	1526	4.631253	35859	0.000000
148	Ca20chrR	1536203	1536926	724	4.088197	1536672	0.000000
149	Ca20chrR	510014	510906	893	3.825030	510434	0.000000
150	Ca20chr1	2802905	2803282	378	4.497906	2802905	0.000000
151	Ca20chr5	112542	113712	1171	3.930551	112746	0.000000
152	Ca20chr1	663788	664537	750	3.848309	664297	0.000000
153	Ca20chr5	774095	775784	1690	4.050584	775580	0.000000
154	Ca20chr5	87225	88587	1363	5.280022	87468	0.000000
155	Ca20chr3	564927	565206	280	4.389070	565101	0.000000
156	Ca20chrR	1844701	1845671	971	4.028359	1845171	0.000000
157	Ca20chr2	2102976	2103901	926	4.141849	2103177	0.000000
158	Ca20chrR	770459	770975	517	4.105501	770703	0.000000
159	Ca20chr1	643091	643554	464	4.768228	643395	0.000000
160	Ca20chr3	1546755	1547829	1075	4.568348	1547741	0.000000
161	Ca20chr1	1741955	1742570	616	4.650373	1742319	0.000000
162	Ca20chr2	1330490	1331041	552	3.870233	1330815	0.000000
163	Ca20chr7	687464	688239	776	4.195798	687707	0.000000
164	Ca20chr1	445547	446138	592	3.988461	445714	0.000000
165	Ca20chrR	1314033	1314594	562	4.863657	1314388	0.000000
166	Ca20chr2	1147099	1147919	821	4.035261	1147371	0.000000
167	Ca20chr1	451281	451997	717	3.853142	451653	0.000000
168	Ca20chr2	1340118	1340832	715	3.851675	1340399	0.000000
169	Ca20chrR	1676323	1676864	542	5.114032	1676712	0.000000
170	Ca20chr2	236826	237248	423	4.663448	236959	0.000000
171	Ca20chr5	1177850	1179080	1231	4.016022	1178328	0.000000
172	Ca20chr3	407730	408296	567	5.069228	408019	0.000000
173	Ca20chr4	910230	911015	786	4.070843	910859	0.000000
174	Ca20chr1	2205840	2206382	543	4.200354	2206127	0.000000
175	Ca20chr3	1275321	1275710	390	4.370866	1275508	0.000000
176	Ca20chrR	600653	601448	796	3.764800	601016	0.000000
177	Ca20chr1	3007914	3008354	441	5.030818	3008131	0.000000
178	Ca20chrR	1042699	1043152	454	4.929234	1042962	0.000000
179	Ca20chr4	230953	231392	440	4.449963	231165	0.000000
180	Ca20chr5	1139213	1139763	551	4.213163	1139508	0.000000
181	Ca20chr2	1187585	1189217	1633	4.184444	1189129	0.000000
182	Ca20chr4	575262	576125	864	3.865902	575850	0.000000
183	Ca20chr3	1263044	1263569	526	3.990049	1263279	0.000000
184	Ca20chr2	1587608	1588024	417	4.432530	1587811	0.000000
185	Ca20chr3	1617325	1618399	1075	4.799118	1617629	0.000000
186	Ca20chr3	1127914	1128206	293	3.938801	1127914	0.000000
187	Ca20chr1	1337268	1337906	639	4.338759	1337497	0.000000
188	Ca20chr4	473460	474608	1149	4.086100	473711	0.000000
189	Ca20chrR	353079	353502	424	4.709156	353419	0.000000
190	Ca20chr1	1579386	1580090	705	4.957730	1579883	0.000000
191	Ca20chr1	2187654	2189552	1899	4.028271	2189242	0.000000
192	Ca20chr1	2349688	2350475	788	3.633338	2350059	0.000000
193	Ca20chr5	178323	178892	570	3.969091	178587	0.000000
194	Ca20chr7	182468	183074	607	3.837407	182982	0.000000
195	Ca20chr4	173959	174371	413	4.404199	174027	0.000000
196	Ca20chr4	1473946	1475476	1531	4.052306	1474446	0.000000
197	Ca20chr5	248004	248491	488	3.740695	248210	0.000000
198	Ca20chr1	1945677	1947236	1560	4.342754	1945937	0.000000
199	Ca20chr5	798437	799123	687	3.804524	798944	0.000000
200	Ca20chrR	129444	130071	628	4.072128	129789	0.000000
201	Ca20chr1	3159041	3159731	691	4.048089	3159445	0.000000
202	Ca20chr1	2992671	2993128	458	4.584962	2992961	0.000000
203	Ca20chr3	1121926	1122388	463	4.143352	1122135	0.000000
204	Ca20chr3	1790057	1791637	1581	3.683268	1791038	0.000000
205	Ca20chrR	993158	993652	495	4.050194	993370	0.000000
206	Ca20chr1	2583404	2584020	617	4.213571	2583731	0.000000
207	Ca20chrR	1278136	1279061	926	3.585661	1278908	0.000000
208	Ca20chr7	365826	366519	694	4.805067	366190	0.000000
209	Ca20chr2	1200613	1201034	422	4.615609	1200959	0.000000
210	Ca20chr6	459474	461099	1626	4.199517	459836	0.000000
211	Ca20chr1	626098	626871	774	4.124451	626640	0.000000
212	Ca20chr5	1030779	1031872	1094	3.783574	1031014	0.000000
213	Ca20chr5	472458	473347	890	4.163787	473171	0.000000
214	Ca20chr6	986711	987489	779	3.756601	986877	0.000000
215	Ca20chr2	795316	795690	375	4.639907	795573	0.000000
216	Ca20chr1	2229650	2230895	1246	3.725552	2229861	0.000000
217	Ca20chr1	162772	163626	855	3.797559	163199	0.000000
218	Ca20chr2	1677902	1678468	567	4.170282	1678105	0.000000
219	Ca20chr2	2084351	2084750	400	5.728230	2084633	0.000000
220	Ca20chr6	333280	334034	755	3.744129	333822	0.000000
221	Ca20chr2	1314175	1314856	682	4.032061	1314523	0.000000
222	Ca20chr3	274404	274709	306	4.097081	274631	0.000000
223	Ca20chr2	320764	321447	684	4.492151	321265	0.000000
224	Ca20chr4	844983	845578	596	4.432656	845339	0.000000
225	Ca20chrR	1897098	1897594	497	3.580946	1897384	0.000000
226	Ca20chr2	2057230	2058038	809	4.443570	2057759	0.000000
227	Ca20chrR	669979	671039	1061	4.709889	670169	0.000000
228	Ca20chr5	821896	822459	564	3.666948	822378	0.000000
229	Ca20chr1	2053574	2054171	598	4.308942	2053766	0.000000
230	Ca20chr7	519921	520530	610	4.571683	520208	0.000000
231	Ca20chr5	1113840	1114706	867	4.483444	1114117	0.000000
232	Ca20chr5	561312	561509	198	4.688687	561415	0.000000
233	Ca20chr1	2709503	2710058	556	3.640983	2709503	0.000000
234	Ca20chr2	979562	980178	617	4.331249	979794	0.000000
235	Ca20chr1	3035197	3036149	953	3.687425	3035854	0.000000
236	Ca20chr1	1476231	1476608	378	4.298791	1476296	0.000000
237	Ca20chr1	15999	16743	745	3.719129	16475	0.000000
238	Ca20chrR	1127601	1128444	844	3.329254	1128291	0.000000
239	Ca20chr5	467639	468509	871	3.808367	467917	0.000000
240	Ca20chr1	2291190	2292091	902	3.722189	2291990	0.000000
241	Ca20chrR	418424	419203	780	3.823000	418844	0.000000
242	Ca20chr1	2217428	2217888	461	4.121975	2217628	0.000000
243	Ca20chr1	2102646	2103257	612	4.005864	2103052	0.000000
244	Ca20chr1	1036600	1037073	474	4.828948	1036878	0.000000
245	Ca20chr6	249723	250289	567	3.780685	250034	0.000000
246	Ca20chr3	1785107	1785593	487	4.698701	1785327	0.000000
247	Ca20chr6	107071	107607	537	3.852237	107517	0.000000
248	Ca20chr6	42535	43133	599	4.087647	42945	0.000000
249	Ca20chrR	731847	732293	447	4.298393	732171	0.000000
250	Ca20chr1	2975390	2975957	568	3.961455	2975672	0.000000
251	Ca20chr6	925207	925624	418	3.811649	925469	0.000000
252	Ca20chr2	1366822	1367281	460	4.280755	1367034	0.000000
253	Ca20chr1	386392	386834	443	4.343782	386680	0.000000
254	Ca20chr4	566257	566948	692	4.214634	566509	0.000000
255	Ca20chr5	951138	951727	590	3.995075	951518	0.000000
256	Ca20chr3	207261	207871	611	3.330416	207871	0.000000
257	Ca20chr4	238709	240013	1305	4.243068	239794	0.000000
258	Ca20chr3	1473450	1474547	1098	3.657844	1473657	0.000000
259	Ca20chr4	798662	798772	111	4.608302	798662	0.000000
260	Ca20chr3	1040844	1041859	1016	4.060799	1041622	0.000000
261	Ca20chr1	2233986	2234362	377	3.777632	2234284	0.000000
262	Ca20chr7	518821	519120	300	4.303672	519120	0.000000
263	Ca20chr6	665516	666161	646	3.496291	665901	0.000000
264	Ca20chr5	656314	656964	651	4.003423	656692	0.000000
265	Ca20chr1	2719076	2719419	344	4.074242	2719419	0.000000
266	Ca20chr5	599809	600600	792	3.202999	600126	0.000000
267	Ca20chr3	1588589	1589037	449	3.677103	1588857	0.000000
268	Ca20chr1	328794	329233	440	4.299542	329056	0.000000
269	Ca20chr5	276465	276874	410	3.683069	276641	0.000000
270	Ca20chr5	254554	255006	453	3.417911	254811	0.000000
271	Ca20chrR	1287303	1287758	456	3.757434	1287680	0.000000
272	Ca20chrR	440641	441275	635	4.248628	441037	0.000000
273	Ca20chr1	2998634	2998950	317	4.034136	2998798	0.000000
274	Ca20chr6	945754	946314	561	3.819468	946079	0.000000
275	Ca20chr5	809989	810472	484	3.616263	810160	0.000000
276	Ca20chr4	689763	690224	462	4.494098	690025	0.000000
277	Ca20chr2	1949786	1950783	998	3.380755	1949962	0.000000
278	Ca20chr5	1061484	1062223	740	4.132442	1061731	0.000000
279	Ca20chr5	525630	526061	432	4.621621	525771	0.000000
280	Ca20chrR	219713	220026	314	3.821053	219895	0.000000
281	Ca20chr3	1321875	1322365	491	3.850791	1322250	0.000000
282	Ca20chr1	416320	416634	315	4.085072	416437	0.000000
283	Ca20chrR	1592234	1592669	436	3.639195	1592402	0.000000
284	Ca20chr2	1338566	1339115	550	3.853957	1338970	0.000000
285	Ca20chr1	1364556	1365384	829	4.336283	1365200	0.000000
286	Ca20chr1	514135	514434	300	2.462789	514135	0.000000
287	Ca20chr6	952490	952826	337	5.179409	952632	0.000000
288	Ca20chrR	2018354	2018884	531	3.619264	2018471	0.000000
289	Ca20chr3	1469969	1470856	888	3.368339	1470412	0.000000
290	Ca20chrR	2119678	2120344	667	3.680850	2120132	0.000000
291	Ca20chrR	1156977	1157505	529	3.855653	1157126	0.000000
292	Ca20chr5	212	779	568	3.581392	458	0.000000
293	Ca20chr6	616542	616896	355	4.154453	616790	0.000000
294	Ca20chr4	171735	172295	561	4.555801	171824	0.000000
295	Ca20chr6	556996	557514	519	3.300184	557514	0.000000
296	Ca20chr1	163850	164407	558	4.133967	164199	0.000000
297	Ca20chr4	779757	780386	630	3.415372	780216	0.000000
298	Ca20chr4	130707	131109	403	3.450396	130846	0.000000
299	Ca20chr4	811418	811939	522	4.553753	811687	0.000000
300	Ca20chr5	1085521	1086262	742	3.651564	1085750	0.000000
301	Ca20chr1	2951627	2952206	580	3.295326	2951820	0.000000
302	Ca20chr3	1645392	1645823	432	3.561615	1645480	0.000000
303	Ca20chr2	313879	314394	516	4.372586	314242	0.000000
304	Ca20chr1	2811882	2812265	384	4.079603	2811932	0.000000
305	Ca20chr1	1637245	1638064	820	3.513259	1637985	0.000000
306	Ca20chr4	357601	358069	469	3.640372	357663	0.000000
307	Ca20chr7	144699	145251	553	3.898488	144852	0.000000
308	Ca20chrR	1690737	1691519	783	3.486457	1691192	0.000000
309	Ca20chr4	890585	891305	721	3.752654	891099	0.000000
310	Ca20chr5	100181	101476	1296	3.348471	100434	0.000000
311	Ca20chr5	1023033	1023414	382	3.850748	1023244	0.000000
312	Ca20chr1	33216	34350	1135	3.626568	33431	0.000000
313	Ca20chr6	304093	304607	515	3.872831	304344	0.000000
314	Ca20chr1	115828	116257	430	3.910885	116062	0.000000
315	Ca20chr3	132310	132726	417	3.720193	132582	0.000000
316	Ca20chr5	699336	699785	450	4.533493	699582	0.000000
317	Ca20chr5	72732	73187	456	3.849902	73100	0.000000
318	Ca20chr4	1334851	1335184	334	3.652538	1334993	0.000000
319	Ca20chr1	1877490	1878324	835	3.454214	1878152	0.000000
320	Ca20chrR	455431	456157	727	3.478414	455620	0.000000
321	Ca20chr1	1230969	1231458	490	3.996304	1231136	0.000000
322	Ca20chr3	1727067	1727694	628	4.057375	1727520	0.000000
323	Ca20chr2	1333869	1334388	520	3.642803	1334134	0.000000
324	Ca20chrR	2210926	2211373	448	3.676264	2211165	0.000000
325	Ca20chr4	128184	128737	554	3.617111	128347	0.000000
326	Ca20chrR	1343378	1344461	1084	3.269093	1343528	0.000000
327	Ca20chr1	2618599	2618938	340	4.395260	2618758	0.000000
328	Ca20chrR	1379027	1379399	373	3.582222	1379027	0.000000
329	Ca20chr7	134567	135147	581	3.487386	135024	0.000000
330	Ca20chr2	1083669	1084119	451	4.235812	1084041	0.000000
331	Ca20chr1	1981751	1982277	527	4.422043	1982040	0.000000
332	Ca20chr3	197480	198194	715	3.649008	197722	0.000000
333	Ca20chr3	1646560	1647186	627	3.612863	1647052	0.000000
334	Ca20chr4	682044	682403	360	3.512014	682121	0.000000
335	Ca20chrR	730788	731254	467	3.452040	731037	0.000000
336	Ca20chr5	637212	637807	596	3.505586	637685	0.000000
337	Ca20chr4	123655	124119	465	3.665899	123829	0.000000
338	Ca20chr3	1472304	1472670	367	3.438047	1472556	0.000000
339	Ca20chr1	3163196	3163668	473	3.436950	3163668	0.000000
340	Ca20chrR	1321856	1322703	848	3.391286	1322009	0.000000
341	Ca20chrR	1024275	1024649	375	3.661341	1024358	0.000000
342	Ca20chr2	14434	14783	350	4.026472	14679	0.000000
343	Ca20chrR	349096	349361	266	3.898103	349316	0.000000
344	Ca20chr6	708704	709652	949	4.223099	709494	0.000000
345	Ca20chrR	2155147	2155678	532	3.291578	2155593	0.000000
346	Ca20chr2	1402612	1402986	375	3.943656	1402986	0.000000
347	Ca20chr2	1665962	1666225	264	3.527881	1666225	0.000000
348	Ca20chr6	963177	963728	552	3.369943	963473	0.000000
349	Ca20chrR	1417624	1418039	416	4.227277	1417895	0.000000
350	Ca20chr5	529470	529876	407	3.490273	529780	0.000000
351	Ca20chr5	272717	272861	145	3.507394	272795	0.000000
352	Ca20chr1	2912854	2913249	396	3.079601	2913166	0.000000
353	Ca20chr1	735722	736135	414	3.368321	735868	0.000000
354	Ca20chr4	316900	317055	156	3.972089	317055	0.000000
355	Ca20chr1	2106504	2107055	552	4.667503	2107055	0.000000
356	Ca20chr4	715294	715948	655	3.288245	715742	0.000000
357	Ca20chr5	523134	523592	459	3.858773	523419	0.000000
358	Ca20chr1	514947	515544	598	3.620697	515297	0.000000
359	Ca20chrR	1302596	1303439	844	3.345843	1302655	0.000000
360	Ca20chr2	2196929	2197308	380	3.505606	2197011	0.000000
361	Ca20chr2	1972746	1973378	633	3.119213	1972986	0.000000
362	Ca20chr5	1087331	1087687	357	3.726886	1087405	0.000000
363	Ca20chr1	1191117	1191625	509	3.071815	1191293	0.000000
364	Ca20chrR	174962	175377	416	4.256242	175227	0.000000
365	Ca20chrR	1532066	1532446	381	3.706258	1532246	0.000000
366	Ca20chr5	593572	594085	514	3.530109	593937	0.000000
367	Ca20chr1	986575	986772	198	4.014045	986772	0.000000
368	Ca20chr5	1155786	1156173	388	3.573480	1156017	0.000000
369	Ca20chr5	872492	872938	447	3.505868	872725	0.000000
370	Ca20chr4	255488	255832	345	4.425281	255599	0.000000
371	Ca20chr2	739339	739716	378	3.487057	739455	0.000000
372	Ca20chr2	1585916	1586898	983	3.213198	1586801	0.000000
373	Ca20chr5	241955	242259	305	4.081582	242023	0.000000
374	Ca20chrR	562183	562637	455	3.709328	562637	0.000000
375	Ca20chr2	44014	44334	321	4.152636	44204	0.000000
376	Ca20chr2	734930	735219	290	3.132693	735146	0.000000
377	Ca20chr3	1125459	1125828	370	3.405393	1125627	0.000000
378	Ca20chr1	2801288	2801570	283	3.796080	2801507	0.000000
379	Ca20chr2	1458071	1458408	338	3.892884	1458328	0.000000
380	Ca20chr6	38980	39414	435	3.824881	39164	0.000000
381	Ca20chr7	410473	410843	371	3.327888	410646	0.000000
382	Ca20chr4	1459087	1459385	299	3.743218	1459191	0.000000
383	Ca20chr2	897131	897391	261	3.034184	897327	0.000000
384	Ca20chr6	332922	333124	203	4.010669	333124	0.000000
385	Ca20chrR	464611	465221	611	2.969564	464995	0.000000
386	Ca20chr2	389447	389798	352	3.770990	389561	0.000000
387	Ca20chr2	1784506	1784834	329	4.378308	1784714	0.000000
388	Ca20chr1	1747935	1748217	283	3.649643	1748105	0.000000
389	Ca20chr1	2237369	2237612	244	3.663506	2237612	0.000000
390	Ca20chrR	897878	898249	372	3.262815	897956	0.000000
391	Ca20chr1	497633	497895	263	3.597403	497895	0.000000
392	Ca20chr2	436455	436794	340	3.224387	436592	0.000000
393	Ca20chr7	489015	489449	435	3.700039	489449	0.000000
394	Ca20chr1	1867098	1867592	495	3.634989	1867245	0.000000
395	Ca20chr3	364951	365417	467	3.938010	365228	0.000000
396	Ca20chr7	846481	846757	277	3.987797	846697	0.000000
397	Ca20chr4	988281	988705	425	3.039296	988435	0.000000
398	Ca20chrR	2001215	2001574	360	3.559063	2001215	0.000000
399	Ca20chr1	667010	667411	402	3.897578	667224	0.002331
400	Ca20chr3	1305600	1306043	444	3.127574	1305747	0.002331
401	Ca20chr2	2049127	2049361	235	3.772825	2049127	0.002331
402	Ca20chr3	122305	122620	316	3.599155	122533	0.002331
403	Ca20chrR	1538193	1538579	387	3.754855	1538362	0.002331
404	Ca20chr3	1626084	1626487	404	3.417152	1626176	0.002331
405	Ca20chr4	648737	648971	235	3.063036	648971	0.002331
406	Ca20chr4	319313	319611	299	3.694058	319511	0.002331
407	Ca20chr7	804820	804994	175	3.490769	804900	0.002331
408	Ca20chr2	453303	453739	437	4.200753	453438	0.002331
409	Ca20chrR	1143185	1143766	582	3.455115	1143434	0.002331
410	Ca20chrR	2176554	2176971	418	3.240760	2176746	0.002331
411	Ca20chr3	1219673	1220172	500	4.283982	1219790	0.002331
412	Ca20chr1	52105	52810	706	3.141390	52351	0.002331
413	Ca20chr1	991360	991708	349	3.661608	991443	0.002331
414	Ca20chr4	56099	56463	365	3.476913	56352	0.002331
415	Ca20chr1	973372	973780	409	3.601730	973613	0.002331
416	Ca20chr2	2000126	2000403	278	4.035232	2000324	0.002331
417	Ca20chr2	1378574	1379002	429	3.311807	1378747	0.002331
418	Ca20chr7	908012	908296	285	3.378228	908296	0.002331
419	Ca20chr1	438386	438658	273	3.154469	438466	0.002331
420	Ca20chr1	2986299	2986555	257	3.809939	2986299	0.002331
421	Ca20chr2	1935406	1935854	449	3.530272	1935563	0.002331
422	Ca20chr5	881732	882001	270	3.296087	881866	0.002331
423	Ca20chr4	249861	250206	346	3.588241	249960	0.002331
424	Ca20chr3	1312629	1313033	405	3.934768	1312870	0.002331
425	Ca20chr3	1572805	1573352	548	3.069956	1572974	0.002331
426	Ca20chr2	1937206	1937529	324	3.300826	1937529	0.002331
427	Ca20chr3	1167945	1168244	300	3.516187	1168104	0.002331
428	Ca20chrR	524976	525394	419	3.735194	525256	0.002331
429	Ca20chr1	2632369	2632825	457	3.071919	2632528	0.002331
430	Ca20chr7	294628	295009	382	3.724918	294910	0.003854
431	Ca20chr6	682310	682485	176	3.308490	682402	0.003854
432	Ca20chrR	523934	524268	335	4.479992	524006	0.003854
433	Ca20chr1	2848224	2848407	184	2.742150	2848292	0.003854
434	Ca20chr5	710007	710398	392	3.579999	710203	0.003854
435	Ca20chr3	901964	902260	297	3.214582	902177	0.003854
436	Ca20chr1	1524317	1524706	390	3.485395	1524396	0.003854
437	Ca20chr1	3180108	3180508	401	3.582970	3180343	0.003854
438	Ca20chr1	394784	395052	269	3.448901	394844	0.003854
439	Ca20chr5	1115956	1116479	524	2.958637	1116036	0.003854
440	Ca20chr6	444370	444744	375	3.736416	444587	0.003854
441	Ca20chr6	430601	431105	505	2.936787	430837	0.003854
442	Ca20chr3	933161	933517	357	3.288376	933368	0.003854
443	Ca20chr6	705932	706287	356	2.955354	706287	0.003854
444	Ca20chr3	847876	848501	626	3.073558	847956	0.003854
445	Ca20chr2	593149	593559	411	3.740613	593149	0.003854
446	Ca20chr2	597436	597618	183	3.083136	597512	0.003854
447	Ca20chrR	2069021	2069221	201	3.584571	2069089	0.003854
448	Ca20chrR	184544	184777	234	4.057034	184661	0.003854
449	Ca20chrR	226521	226719	199	3.437548	226521	0.003854
450	Ca20chr1	2584595	2584994	400	3.932625	2584994	0.003854
451	Ca20chr1	2315791	2316187	397	2.690938	2316030	0.003854
452	Ca20chr2	1203343	1203544	202	3.523213	1203463	0.003854
453	Ca20chr7	514974	515241	268	3.515945	515107	0.003854
454	Ca20chrR	371401	371837	437	4.244966	371512	0.003854
455	Ca20chr2	430236	430430	195	3.072319	430430	0.003854
456	Ca20chr1	797401	797599	199	3.861845	797599	0.003854
457	Ca20chrR	1755608	1755813	206	3.515730	1755725	0.003854
458	Ca20chr1	3062080	3062483	404	3.273190	3062287	0.003854
459	Ca20chrR	1871510	1871729	220	3.752128	1871612	0.003854
460	Ca20chr2	2005815	2006118	304	3.703660	2005889	0.003854
461	Ca20chr7	299812	300014	203	3.421010	300014	0.003854
462	Ca20chr1	531907	532126	220	3.666446	532015	0.003854
463	Ca20chr5	283803	283971	169	4.104822	283887	0.003854
464	Ca20chr4	560858	561088	231	3.537646	561088	0.003854
465	Ca20chr4	402712	402988	277	2.924511	402803	0.003854
466	Ca20chr1	1784591	1784912	322	4.549387	1784810	0.003854
467	Ca20chrR	119197	119393	197	4.114443	119291	0.003854
468	Ca20chr5	592855	593238	384	3.408389	593062	0.003854
469	Ca20chr1	1047387	1047871	485	3.008080	1047692	0.003854
470	Ca20chr3	2800	3272	473	3.151652	3010	0.003854
471	Ca20chr5	543481	544254	774	3.161746	544117	0.003854
472	Ca20chr5	109505	109743	239	3.854878	109615	0.003854
473	Ca20chrR	1553051	1553185	135	3.442707	1553051	0.003854
474	Ca20chr6	679337	679505	169	3.387526	679419	0.003854
475	Ca20chr1	2157045	2157212	168	2.583242	2157045	0.003854
476	Ca20chr2	1962750	1962921	172	3.176240	1962836	0.003854
477	Ca20chr5	164338	164556	219	3.533616	164451	0.003854
478	Ca20chr4	338053	338296	244	3.465510	338203	0.003854
479	Ca20chr1	1251088	1251640	553	3.404473	1251196	0.003854
480	Ca20chrR	1150114	1150261	148	3.917246	1150186	0.003854
481	Ca20chr3	745325	745757	433	4.344232	745568	0.003854
482	Ca20chr6	717758	718108	351	4.015389	717860	0.003854
483	Ca20chrR	843843	844209	367	3.356276	844093	0.003854
484	Ca20chr3	1146064	1146493	430	3.176754	1146493	0.003854
485	Ca20chr2	1580742	1581107	366	2.943429	1580742	0.003854
486	Ca20chrR	2281119	2281404	286	3.859410	2281326	0.003854
487	Ca20chr2	970590	970758	169	3.558902	970590	0.003854
488	Ca20chr4	1177414	1177672	259	2.808838	1177672	0.003854
489	Ca20chr4	872787	873003	217	2.673007	872787	0.003854
490	Ca20chr6	147228	147474	247	3.448884	147317	0.003854
491	Ca20chr1	3167069	3167425	357	3.061778	3167273	0.003854
492	Ca20chr5	7037	7406	370	2.881614	7289	0.003854
493	Ca20chr4	1077721	1078013	293	2.520446	1078013	0.003854
494	Ca20chr6	500955	501254	300	3.205664	501158	0.003854
495	Ca20chr5	1186070	1186300	231	3.156378	1186300	0.003854
496	Ca20chr4	1036908	1037182	275	3.322410	1037109	0.003854
497	Ca20chr2	1880789	1880987	199	2.849412	1880903	0.003854
498	Ca20chr1	3177906	3179381	1476	3.211054	3179252	0.003854
499	Ca20chr1	1256769	1256983	215	3.300186	1256881	0.003854
500	Ca20chr4	201957	202236	280	2.950104	202073	0.003854
501	Ca20chr2	2120852	2121203	352	3.575249	2120852	0.003854
502	Ca20chr5	608042	608578	537	3.300678	608497	0.003854
503	Ca20chr3	797533	797765	233	2.486972	797663	0.003854
504	Ca20chr6	962584	962956	373	2.949692	962662	0.003854
505	Ca20chr7	181288	181573	286	4.953136	181492	0.003854
506	Ca20chr3	936584	936849	266	2.806619	936731	0.003854
507	Ca20chr7	491945	492150	206	3.271684	492150	0.003854
508	Ca20chr1	503989	504189	201	4.347589	504189	0.003854
509	Ca20chr5	751651	751838	188	3.873548	751745	0.003854
510	Ca20chrR	846251	846476	226	3.480586	846427	0.003854
511	Ca20chr5	1107983	1108295	313	3.071190	1108063	0.003854
512	Ca20chr1	1488982	1489280	299	3.274361	1488982	0.003854
513	Ca20chr3	857027	857130	104	3.627286	857072	0.003854
514	Ca20chr4	1338618	1338956	339	3.085278	1338912	0.003854
515	Ca20chr3	401553	402081	529	3.026583	401793	0.003854
516	Ca20chr1	649965	650122	158	2.997556	649965	0.003854
517	Ca20chr3	27855	28014	160	3.412622	27934	0.003854
518	Ca20chrR	2023730	2024189	460	2.921741	2024060	0.003854
519	Ca20chr6	711961	712215	255	2.780446	712215	0.003854
520	Ca20chr5	258812	259331	520	3.083096	258812	0.005310
521	Ca20chr6	927428	927585	158	3.216180	927475	0.005310
522	Ca20chr2	1864560	1864811	252	3.329828	1864704	0.005310
523	Ca20chrR	1344777	1345143	367	2.879334	1344958	0.005310
524	Ca20chr5	1001940	1002115	176	3.441380	1002014	0.005310
525	Ca20chr1	1287739	1287915	177	2.848399	1287831	0.005310
526	Ca20chr6	985918	986187	270	3.784350	986070	0.005310
527	Ca20chr1	464861	465186	326	3.386848	465186	0.005310
528	Ca20chr3	1157730	1158319	590	3.147835	1158319	0.005310
529	Ca20chr7	469273	469410	138	3.249779	469365	0.005310
530	Ca20chr2	2187275	2187496	222	2.784792	2187382	0.005310
531	Ca20chr4	990830	991174	345	3.108475	991015	0.005310
532	Ca20chr5	528153	528494	342	3.170535	528322	0.005310
533	Ca20chr4	347538	347765	228	3.380751	347650	0.005310
534	Ca20chr6	92489	92716	228	3.898936	92560	0.005310
535	Ca20chr1	1288449	1288607	159	2.854773	1288528	0.005310
536	Ca20chrR	632145	632312	168	2.837193	632312	0.005310
537	Ca20chr5	686908	687062	155	3.282256	687062	0.005310
538	Ca20chr4	522288	522519	232	3.991998	522470	0.005310
539	Ca20chr1	447341	447605	265	2.630081	447605	0.005310
540	Ca20chr1	259147	259257	111	3.183314	259147	0.005310
541	Ca20chr2	1148925	1149188	264	3.161246	1149098	0.005310
542	Ca20chr5	111549	111768	220	3.690210	111768	0.005310
543	Ca20chr1	665263	665463	201	2.759956	665263	0.005310
544	Ca20chr7	601761	601906	146	2.931356	601906	0.005310
545	Ca20chr7	939050	939274	225	3.006851	939127	0.005310
546	Ca20chr2	515170	515346	177	3.185779	515170	0.005310
547	Ca20chr3	560110	560344	235	3.638023	560292	0.005310
548	Ca20chr5	868697	868887	191	3.417811	868887	0.005310
549	Ca20chrR	842924	843080	157	3.428784	843003	0.005310
550	Ca20chr5	611208	611343	136	2.827336	611208	0.005310
551	Ca20chr3	935855	936322	468	3.151478	935991	0.005310
552	Ca20chr1	2328576	2328731	156	3.109349	2328731	0.005310
553	Ca20chr7	940920	941124	205	2.904195	941124	0.005310
554	Ca20chr4	569217	569431	215	3.439218	569431	0.005310
555	Ca20chrR	1669055	1669252	198	3.262031	1669135	0.005310
556	Ca20chr4	521098	521217	120	3.296156	521217	0.005310
557	Ca20chr6	324198	324455	258	3.012353	324317	0.005310
558	Ca20chr1	268598	268797	200	2.088676	268797	0.005310
559	Ca20chr3	976200	976373	174	2.771096	976373	0.005310
560	Ca20chr7	553083	553448	366	3.227635	553369	0.005310
561	Ca20chr4	719148	719302	155	3.052848	719302	0.005310
562	Ca20chrR	1534507	1534688	182	2.044196	1534507	0.005310
563	Ca20chr3	712269	712418	150	3.170538	712337	0.005310
564	Ca20chr1	146622	146875	254	2.961939	146699	0.005310
565	Ca20chr2	594756	594861	106	2.773298	594813	0.005310
