# Supplementary material for: A conserved regulator controls asexual sporulation in the fungal pathogen Candida albicans
Source: Nat Commun. 2020 Dec 4;11:6224. doi: 10.1038/s41467-020-20010-9 (PMC7718266; doi:10.1038/s41467-020-20010-9)
Supplement: Supplementary file 7 — Supplementary Data 4 [file 41467_2020_20010_MOESM7_ESM.xlsx]

## Sheet: Table S4 lower peaks rep2
#rank	chromosome	start	end	region_length	maxFC(log2)	position_of_maxFC	FDR
1	Ca20chr3	496369	497052	684	4.896698	496793	0.000000
2	Ca20chr3	186174	187038	865	4.503336	186608	0.000000
3	Ca20chr1	370629	371322	694	4.832216	371032	0.000000
4	Ca20chr3	1509138	1509781	644	4.635322	1509376	0.000000
5	Ca20chrR	1635640	1636073	434	4.844269	1636073	0.000000
6	Ca20chr5	279735	280454	720	4.527668	280203	0.000000
7	Ca20chr1	946093	946868	776	4.683884	946673	0.000000
8	Ca20chrR	606301	607001	701	4.913294	606690	0.000000
9	Ca20chr2	1673513	1674160	648	4.419228	1673823	0.000000
10	Ca20chr7	828740	829462	723	4.796196	829080	0.000000
11	Ca20chr1	355541	356900	1360	4.761490	355898	0.000000
12	Ca20chr2	315643	316448	806	4.763363	315912	0.000000
13	Ca20chrR	1115839	1116429	591	4.976382	1116206	0.000000
14	Ca20chr1	1550253	1550831	579	4.309787	1550628	0.000000
15	Ca20chr1	1577262	1577739	478	4.228306	1577492	0.000000
16	Ca20chr2	1829576	1831554	1979	4.667800	1830807	0.000000
17	Ca20chrR	1812311	1812842	532	4.717248	1812661	0.000000
18	Ca20chr3	208356	209261	906	4.430965	208746	0.000000
19	Ca20chr2	1284111	1284706	596	4.657631	1284363	0.000000
20	Ca20chr3	263607	264546	940	4.134662	264226	0.000000
21	Ca20chr5	854940	855957	1018	4.159037	855689	0.000000
22	Ca20chr1	410453	411158	706	4.430982	411158	0.000000
23	Ca20chr2	1456580	1457339	760	4.137573	1456898	0.000000
24	Ca20chrR	1131499	1131933	435	4.227485	1131667	0.000000
25	Ca20chr1	2952738	2953985	1248	4.650240	2953061	0.000000
26	Ca20chr1	2244287	2245025	739	4.980016	2244636	0.000000
27	Ca20chr3	565363	565654	292	4.541259	565480	0.000000
28	Ca20chr2	1133533	1134974	1442	4.439277	1134818	0.000000
29	Ca20chr6	432166	432904	739	4.262697	432507	0.000000
30	Ca20chr7	599824	600758	935	4.317691	600238	0.000000
31	Ca20chr3	1373541	1374245	705	4.316543	1374129	0.000000
32	Ca20chr1	1831919	1832942	1024	4.324940	1832389	0.000000
33	Ca20chrR	1151930	1153151	1222	3.929595	1153034	0.000000
34	Ca20chrR	1727121	1729198	2078	4.289665	1728845	0.000000
35	Ca20chr4	1336424	1337851	1428	4.554432	1337564	0.000000
36	Ca20chrR	1722143	1723954	1812	4.380906	1722929	0.000000
37	Ca20chr1	600300	600878	579	4.545423	600673	0.000000
38	Ca20chr6	348463	349966	1504	4.015697	348900	0.000000
39	Ca20chr6	288868	289360	493	4.929059	289102	0.000000
40	Ca20chr1	2187747	2189552	1806	4.758583	2189242	0.000000
41	Ca20chr4	478529	479326	798	4.623540	478987	0.000000
42	Ca20chr1	1459419	1459869	451	4.437754	1459791	0.000000
43	Ca20chr3	235178	235696	519	4.415294	235314	0.000000
44	Ca20chr4	625726	626459	734	4.058894	625900	0.000000
45	Ca20chrR	1532986	1533666	681	4.104337	1533185	0.000000
46	Ca20chr4	1324956	1325426	471	4.199092	1325220	0.000000
47	Ca20chr7	700857	701510	654	4.581133	701118	0.000000
48	Ca20chrR	1584788	1585182	395	4.940175	1585019	0.000000
49	Ca20chr3	1072432	1073537	1106	4.047578	1072662	0.000000
50	Ca20chr7	451823	454129	2307	4.174900	452505	0.000000
51	Ca20chr1	2291190	2292091	902	4.161896	2291916	0.000000
52	Ca20chr1	1501566	1502140	575	3.968149	1501759	0.000000
53	Ca20chr1	1637165	1638296	1132	4.161481	1638064	0.000000
54	Ca20chrR	74750	75354	605	4.536484	75048	0.000000
55	Ca20chr5	1139213	1139946	734	4.674867	1139649	0.000000
56	Ca20chr2	1158252	1158996	745	4.089990	1158423	0.000000
57	Ca20chr2	377068	377665	598	4.106356	377303	0.000000
58	Ca20chr1	2347202	2348118	917	4.131361	2347701	0.000000
59	Ca20chr3	710070	710871	802	4.256094	710607	0.000000
60	Ca20chr2	439551	440625	1075	4.402652	440512	0.000000
61	Ca20chr4	1444490	1445372	883	4.463457	1445285	0.000000
62	Ca20chrR	1087142	1088249	1108	4.132396	1087742	0.000000
63	Ca20chr2	994416	994819	404	3.832340	994708	0.000000
64	Ca20chr7	113845	114975	1131	4.518841	114472	0.000000
65	Ca20chr2	2135768	2136601	834	3.953100	2135808	0.000000
66	Ca20chrR	1536312	1536926	615	4.022048	1536593	0.000000
67	Ca20chr6	290255	291678	1424	4.274828	290891	0.000000
68	Ca20chr7	779642	781236	1595	4.353748	779814	0.000000
69	Ca20chr3	1349056	1351043	1988	3.963601	1350568	0.000000
70	Ca20chr1	663788	664537	750	4.228490	664537	0.000000
71	Ca20chr1	66559	67265	707	3.942297	67059	0.000000
72	Ca20chr3	742909	743577	669	4.091236	743118	0.000000
73	Ca20chr1	349399	349936	538	4.350840	349766	0.000000
74	Ca20chr2	162604	163588	985	4.032861	162744	0.000000
75	Ca20chr4	401257	402221	965	4.287973	401795	0.000000
76	Ca20chr1	2349794	2350475	682	3.751795	2350145	0.000000
77	Ca20chr4	983575	984192	618	4.626737	983955	0.000000
78	Ca20chrR	1844701	1845671	971	4.195488	1845171	0.000000
79	Ca20chr1	2423773	2424500	728	4.359869	2424419	0.000000
80	Ca20chr5	653984	656080	2097	4.484229	654417	0.000000
81	Ca20chr2	1841590	1842676	1087	4.148759	1842397	0.000000
82	Ca20chr1	2569232	2570005	774	3.705116	2569802	0.000000
83	Ca20chr1	451396	451997	602	4.403328	451653	0.000000
84	Ca20chrR	2162017	2162838	822	4.501293	2162462	0.000000
85	Ca20chr2	1015026	1015685	660	4.228363	1015255	0.000000
86	Ca20chr2	1614340	1614940	601	4.233188	1614761	0.000000
87	Ca20chrR	1165961	1166827	867	3.878763	1166632	0.000000
88	Ca20chrR	1987774	1988515	742	3.966117	1987955	0.000000
89	Ca20chr7	724789	725351	563	4.199330	725155	0.000000
90	Ca20chrR	176364	176907	544	4.093417	176629	0.000000
91	Ca20chr3	1570721	1571260	540	3.891985	1570997	0.000000
92	Ca20chr1	231136	231903	768	4.111349	231586	0.000000
93	Ca20chr2	660798	661472	675	4.052598	661176	0.000000
94	Ca20chr4	798243	798487	245	4.066625	798487	0.000000
95	Ca20chrR	1676244	1676864	621	4.827453	1676712	0.000000
96	Ca20chrR	208721	209315	595	4.029413	209081	0.000000
97	Ca20chr1	2222414	2223146	733	4.199749	2222746	0.000000
98	Ca20chr2	348768	349236	469	4.068150	349125	0.000000
99	Ca20chr1	2053695	2054171	477	4.171585	2053843	0.000000
100	Ca20chr1	2709428	2710058	631	4.191782	2709697	0.000000
101	Ca20chr1	1072172	1072922	751	4.447570	1072678	0.000000
102	Ca20chr6	460536	461099	564	4.307124	461004	0.000000
103	Ca20chr1	2568150	2568829	680	3.915140	2568369	0.000000
104	Ca20chr2	1745478	1746048	571	4.411968	1745899	0.000000
105	Ca20chr6	911706	912203	498	4.273969	912142	0.000000
106	Ca20chr1	1877490	1878376	887	4.373258	1878245	0.000000
107	Ca20chrR	1835529	1836105	577	4.009824	1835819	0.000000
108	Ca20chr1	468387	468731	345	4.602116	468535	0.000000
109	Ca20chrR	770459	770975	517	4.161205	770703	0.000000
110	Ca20chr4	1325694	1328125	2432	3.675119	1326669	0.000000
111	Ca20chr6	500876	501334	459	4.145497	501041	0.000000
112	Ca20chr2	2103067	2103901	835	4.501822	2103785	0.000000
113	Ca20chr1	2156929	2157387	459	3.771967	2157124	0.000000
114	Ca20chr5	774095	775580	1486	3.806784	775467	0.000000
115	Ca20chrR	295971	297002	1032	3.996995	296260	0.000000
116	Ca20chrR	1370579	1371111	533	4.617625	1370888	0.000000
117	Ca20chr7	454749	455462	714	4.085906	454834	0.000000
118	Ca20chr3	1216015	1216586	572	3.741607	1216417	0.000000
119	Ca20chr1	1945937	1947168	1232	4.467974	1946147	0.000000
120	Ca20chr4	172585	172969	385	3.932710	172852	0.000000
121	Ca20chr3	919660	920228	569	3.884121	919933	0.000000
122	Ca20chr2	742729	743279	551	4.708350	742830	0.000000
123	Ca20chr1	1083896	1084781	886	3.721377	1084555	0.000000
124	Ca20chr5	260193	260990	798	4.315308	260687	0.000000
125	Ca20chr3	1473542	1474547	1006	4.184058	1473761	0.000000
126	Ca20chr1	344211	344466	256	3.585498	344211	0.000000
127	Ca20chrR	848110	849340	1231	4.069869	848396	0.000000
128	Ca20chr4	1056627	1057022	396	4.368090	1056843	0.000000
129	Ca20chr3	1263044	1263569	526	4.146954	1263279	0.000000
130	Ca20chrR	1703365	1703757	393	3.952841	1703529	0.000000
131	Ca20chr4	575262	576125	864	3.895390	575850	0.000000
132	Ca20chr2	2051532	2052081	550	4.753014	2051795	0.000000
133	Ca20chrR	897878	898372	495	4.087880	898249	0.000000
134	Ca20chrR	510014	510789	776	3.961211	510434	0.000000
135	Ca20chr2	1231715	1232302	588	3.977247	1231814	0.000000
136	Ca20chr2	2106715	2107783	1069	3.983482	2107187	0.000000
137	Ca20chrR	77345	78177	833	3.732888	77543	0.000000
138	Ca20chrR	655412	655832	421	3.984369	655467	0.000000
139	Ca20chr2	1363998	1365056	1059	3.874314	1364510	0.000000
140	Ca20chr2	1314061	1314856	796	4.251552	1314523	0.000000
141	Ca20chrR	613915	614503	589	3.852383	614306	0.000000
142	Ca20chr6	433365	433935	571	4.349368	433619	0.000000
143	Ca20chrR	989126	989923	798	3.727683	989526	0.000000
144	Ca20chr5	178323	178816	494	3.825076	178538	0.000000
145	Ca20chr3	1121815	1122388	574	4.078805	1122203	0.000000
146	Ca20chr6	249803	250554	752	3.821842	250034	0.000000
147	Ca20chr7	182468	182982	515	3.718184	182982	0.000000
148	Ca20chr6	665631	666358	728	3.611333	666219	0.000000
149	Ca20chrR	1592234	1592748	515	3.854319	1592611	0.000000
150	Ca20chr2	1918625	1919014	390	3.953321	1919014	0.000000
151	Ca20chr1	2583404	2583847	444	4.366284	2583731	0.000000
152	Ca20chr4	648737	649083	347	3.967734	649083	0.000000
153	Ca20chr5	247925	248491	567	3.653015	248131	0.000000
154	Ca20chr5	112746	113613	868	3.413024	113613	0.000000
155	Ca20chrR	1755520	1755986	467	4.220957	1755813	0.000000
156	Ca20chr6	556996	557561	566	3.775245	557379	0.000000
157	Ca20chr5	1113840	1114706	867	4.044753	1114117	0.000000
158	Ca20chr1	1742052	1742483	432	3.948101	1742241	0.000000
159	Ca20chrR	1127601	1128369	769	3.366633	1127995	0.000000
160	Ca20chr1	2998634	2999019	386	4.417278	2998798	0.000000
161	Ca20chr2	1587608	1588024	417	4.275293	1587872	0.000000
162	Ca20chr4	1109860	1110773	914	3.705324	1109976	0.000000
163	Ca20chr2	1330490	1331041	552	3.700062	1330666	0.000000
164	Ca20chr4	1473946	1475476	1531	4.273047	1475103	0.000000
165	Ca20chr7	687583	688239	657	4.128107	687707	0.000000
166	Ca20chr4	128261	128814	554	3.988449	128439	0.000000
167	Ca20chr3	274404	274786	383	4.818425	274631	0.000000
168	Ca20chr1	2205958	2206310	353	4.197739	2206205	0.000000
169	Ca20chr1	2217428	2217888	461	4.126191	2217771	0.000000
170	Ca20chr4	807316	807603	288	3.909635	807316	0.000000
171	Ca20chr2	1949786	1950700	915	3.592103	1950185	0.000000
172	Ca20chr1	1047306	1048009	704	4.421561	1047732	0.000000
173	Ca20chr5	797642	799014	1373	3.624390	797830	0.000000
174	Ca20chr1	2802905	2803165	261	4.190770	2802905	0.000000
175	Ca20chr1	624404	625394	991	3.839036	625097	0.000000
176	Ca20chrR	1156977	1157583	607	3.732585	1157279	0.000000
177	Ca20chr3	1273508	1273936	429	4.162539	1273778	0.000000
178	Ca20chr2	1670289	1670888	600	3.894483	1670765	0.000000
179	Ca20chr2	1187585	1189217	1633	4.834443	1189129	0.000000
180	Ca20chr4	230953	231392	440	4.060383	231165	0.000000
181	Ca20chr3	132310	132726	417	4.264150	132582	0.000000
182	Ca20chr2	114620	114913	294	2.958069	114620	0.000000
183	Ca20chr5	599896	600769	874	3.976481	600600	0.000000
184	Ca20chr5	100434	102693	2260	4.104083	102189	0.000000
185	Ca20chr1	523924	524372	449	4.531434	524111	0.000000
186	Ca20chr1	3007957	3008354	398	4.355451	3008212	0.000000
187	Ca20chr4	779757	780386	630	3.553664	780131	0.000000
188	Ca20chr1	445340	446223	884	3.814641	445979	0.000000
189	Ca20chr7	908012	908376	365	3.928512	908376	0.000000
190	Ca20chrR	1809943	1810982	1040	3.624361	1810363	0.000000
191	Ca20chr4	8297	8750	454	3.430192	8365	0.000000
192	Ca20chrR	2210926	2211442	517	3.963785	2211165	0.000000
193	Ca20chr1	735722	736135	414	4.404623	735972	0.000000
194	Ca20chr2	1678040	1678468	429	3.812856	1678105	0.000000
195	Ca20chrR	1073732	1074125	394	4.072650	1073926	0.000000
196	Ca20chr5	580552	580982	431	4.046450	580552	0.000000
197	Ca20chrR	129444	130071	628	3.776791	129789	0.000000
198	Ca20chr1	115828	116257	430	3.721747	116062	0.000000
199	Ca20chr1	1256599	1257040	442	4.250582	1256881	0.000000
200	Ca20chr1	1230969	1231511	543	3.820710	1231136	0.000000
201	Ca20chr4	689763	690224	462	4.910357	690025	0.000000
202	Ca20chr3	565059	565206	148	4.031837	565101	0.000000
203	Ca20chr4	532338	533029	692	4.198682	532631	0.000000
204	Ca20chrR	1532066	1532608	543	3.957164	1532527	0.000000
205	Ca20chrR	858093	858412	320	4.088361	858412	0.000000
206	Ca20chr3	541911	542259	349	3.988811	542000	0.000000
207	Ca20chr4	798662	798854	193	4.487309	798662	0.000000
208	Ca20chr2	1149686	1150237	552	3.920690	1150158	0.000000
209	Ca20chr3	1469897	1470982	1086	3.369174	1470807	0.000000
210	Ca20chr4	130707	131226	520	3.290095	130963	0.000000
211	Ca20chr1	2811803	2812382	580	4.236167	2812265	0.000000
212	Ca20chr4	703360	703719	360	4.139747	703719	0.000000
213	Ca20chr5	1023127	1023610	484	4.012097	1023334	0.000000
214	Ca20chr1	2790518	2791426	909	4.288344	2790657	0.000000
215	Ca20chr5	1030854	1031796	943	3.548072	1031014	0.000000
216	Ca20chr3	791863	792503	641	3.831135	792221	0.000000
217	Ca20chr3	207261	207871	611	3.435894	207780	0.000000
218	Ca20chr1	991360	991781	422	4.219295	991532	0.000000
219	Ca20chrR	2155147	2155678	532	3.467974	2155593	0.000000
220	Ca20chr2	1935337	1935854	518	3.922628	1935627	0.000000
221	Ca20chrR	299558	300267	710	3.986152	299558	0.000000
222	Ca20chr1	1740575	1741133	559	3.699346	1740651	0.000000
223	Ca20chr5	593572	594202	631	3.674935	593937	0.000000
224	Ca20chr2	236959	237248	290	4.464457	237145	0.000000
225	Ca20chrR	1314033	1314594	562	4.047400	1314294	0.000000
226	Ca20chr5	449626	449969	344	4.006057	449702	0.000000
227	Ca20chr4	845059	845578	520	4.409504	845339	0.000000
228	Ca20chr1	626290	626871	582	3.724481	626640	0.000000
229	Ca20chr1	3035197	3036149	953	3.414942	3035932	0.000000
230	Ca20chr1	2848147	2848650	504	4.113125	2848407	0.000000
231	Ca20chr1	447224	447816	593	3.404557	447558	0.000000
232	Ca20chr4	255488	255832	345	4.810983	255599	0.000000
233	Ca20chr5	679194	679531	338	3.828061	679357	0.000000
234	Ca20chr3	1588589	1589037	449	3.602727	1588750	0.000000
235	Ca20chrR	1302596	1303547	952	4.081099	1302799	0.000000
236	Ca20chr1	2233986	2234362	377	3.948182	2234284	0.000000
237	Ca20chr4	910230	910936	707	3.600790	910859	0.000000
238	Ca20chr2	1147099	1147702	604	3.359970	1147204	0.000000
239	Ca20chrR	600935	601558	624	3.479938	601175	0.000000
240	Ca20chr1	2951705	2952345	641	3.706428	2951820	0.000000
241	Ca20chr3	1550774	1551366	593	4.080890	1551117	0.000000
242	Ca20chrR	614907	615690	784	4.008649	615250	0.000000
243	Ca20chr6	444446	444861	416	3.849900	444587	0.000000
244	Ca20chr4	238784	239958	1175	4.041446	239794	0.000000
245	Ca20chr1	3159121	3159650	530	3.333877	3159445	0.000000
246	Ca20chr1	2719076	2719419	344	3.978656	2719419	0.000000
247	Ca20chr6	986792	987389	598	3.723920	986877	0.000000
248	Ca20chr1	2229495	2230725	1231	4.329238	2229861	0.000000
249	Ca20chr1	2593651	2594272	622	3.993506	2593950	0.000000
250	Ca20chr1	1337352	1337727	376	4.160188	1337497	0.000000
251	Ca20chr5	637147	637807	661	3.557779	637685	0.000000
252	Ca20chrR	2001776	2002448	673	3.750828	2002012	0.000000
253	Ca20chr4	811501	812024	524	3.836844	811573	0.000000
254	Ca20chr2	389447	389798	352	3.677834	389727	0.000000
255	Ca20chrR	730886	731353	468	4.026934	731108	0.000000
256	Ca20chrR	993266	993652	387	3.839148	993370	0.000000
257	Ca20chrR	464531	465294	764	3.584963	464995	0.000000
258	Ca20chr4	872708	873155	448	3.653474	872708	0.000000
259	Ca20chr6	333280	334034	755	3.976147	333822	0.000000
260	Ca20chrR	670169	671039	871	4.333113	670169	0.000000
261	Ca20chr3	1040844	1041859	1016	3.985284	1041622	0.000000
262	Ca20chr5	951138	951809	672	3.579693	951518	0.000000
263	Ca20chr4	555323	555592	270	3.729893	555440	0.000000
264	Ca20chr2	1580742	1581272	531	4.139725	1580965	0.000000
265	Ca20chr3	197546	198275	730	3.339557	197800	0.000000
266	Ca20chr1	801630	802011	382	3.871936	801969	0.000000
267	Ca20chr1	1996909	1997401	493	4.012789	1997089	0.000000
268	Ca20chr1	643171	643554	384	4.123138	643395	0.000000
269	Ca20chr1	531907	532126	220	3.778713	532126	0.000000
270	Ca20chr3	1127914	1128206	293	3.287002	1128024	0.000000
271	Ca20chr4	1459087	1459385	299	3.803240	1459191	0.000000
272	Ca20chr6	679220	679592	373	3.669596	679419	0.000000
273	Ca20chrR	1278136	1279061	926	3.314232	1278908	0.000000
274	Ca20chr6	107071	107607	537	3.863519	107517	0.000000
275	Ca20chr5	283692	284049	358	4.394555	283803	0.000000
276	Ca20chr3	1617400	1618399	1000	3.913137	1617400	0.000000
277	Ca20chr1	514135	514434	300	2.696292	514357	0.000000
278	Ca20chrR	2265995	2266429	435	4.137168	2266266	0.000000
279	Ca20chr5	1085521	1086262	742	3.737562	1085750	0.000000
280	Ca20chr2	795316	795690	375	3.985004	795573	0.000000
281	Ca20chr1	2196555	2197187	633	4.024770	2196810	0.000000
282	Ca20chr5	254661	255006	346	3.240910	255006	0.000000
283	Ca20chr2	1340214	1340832	619	3.552273	1340399	0.000000
284	Ca20chr3	122305	122620	316	3.847147	122533	0.000000
285	Ca20chr1	1981835	1982160	326	4.162022	1982118	0.000000
286	Ca20chr1	33216	34289	1074	3.832133	33471	0.000000
287	Ca20chr1	2912676	2913249	574	3.648395	2913249	0.000000
288	Ca20chr2	447164	447400	237	3.584196	447400	0.000000
289	Ca20chr5	699336	699785	450	4.230031	699582	0.000000
290	Ca20chrR	455431	456233	803	3.388935	456049	0.000000
291	Ca20chr1	1476296	1476608	313	4.128404	1476480	0.000000
292	Ca20chr1	2632236	2632825	590	3.661181	2632605	0.000000
293	Ca20chr2	1200695	1201034	340	4.514224	1201034	0.000000
294	Ca20chr2	1972746	1973378	633	3.392243	1973068	0.000000
295	Ca20chr3	1546840	1547741	902	4.286192	1547741	0.000000
296	Ca20chr3	407730	408225	496	5.274721	408019	0.000000
297	Ca20chrR	1042770	1043045	276	4.272942	1042962	0.000000
298	Ca20chr1	52043	52810	768	3.464999	52434	0.000000
299	Ca20chr1	1036600	1037073	474	4.100552	1036878	0.000000
300	Ca20chr3	797443	797765	323	3.300642	797533	0.000000
301	Ca20chr5	1155864	1156173	310	3.649989	1156017	0.000000
302	Ca20chr1	438292	438658	367	3.698923	438466	0.000000
303	Ca20chr1	822684	822974	291	4.092483	822974	0.000000
304	Ca20chr1	16134	16603	470	3.415172	16424	0.000000
305	Ca20chr3	1727010	1727606	597	4.193960	1727366	0.000000
306	Ca20chr5	822008	822459	452	3.474885	822378	0.000000
307	Ca20chrR	119154	119488	335	4.486583	119291	0.000000
308	Ca20chr5	164261	164654	394	3.801090	164556	0.000000
309	Ca20chr5	1176545	1176964	420	3.589733	1176619	0.000000
310	Ca20chr5	656392	656902	511	3.765281	656816	0.000000
311	Ca20chr2	1864560	1864811	252	3.893618	1864811	0.000000
312	Ca20chrR	1538193	1538653	461	4.046742	1538362	0.000000
313	Ca20chr7	206952	207357	406	4.109725	207064	0.000000
314	Ca20chr6	38980	39460	481	3.591502	39164	0.000000
315	Ca20chr1	2975466	2975957	492	3.711985	2975751	0.000000
316	Ca20chr1	35669	36138	470	3.391422	35859	0.000000
317	Ca20chr3	1275321	1275612	292	3.913215	1275508	0.000000
318	Ca20chr5	709940	710398	459	3.787894	710203	0.000000
319	Ca20chr5	467715	468385	671	3.386125	467715	0.000000
320	Ca20chr2	430160	430541	382	3.102576	430430	0.000000
321	Ca20chr5	926677	927051	375	3.329735	926755	0.000000
322	Ca20chr6	945855	946314	460	3.963570	946079	0.000000
323	Ca20chr4	56099	56463	365	3.774971	56352	0.000000
324	Ca20chrR	1379027	1379399	373	3.635774	1379399	0.000000
325	Ca20chr2	2005815	2006118	304	3.809599	2006035	0.000000
326	Ca20chr3	1125459	1125828	370	3.137846	1125627	0.000000
327	Ca20chr4	672173	672821	649	3.852094	672410	0.000000
328	Ca20chr1	2992671	2993015	345	4.318958	2992961	0.000000
329	Ca20chr5	525704	526137	434	4.616457	525900	0.000000
330	Ca20chr3	847799	848638	840	3.291895	848119	0.000000
331	Ca20chr2	1103537	1104425	889	3.521764	1103586	0.000000
332	Ca20chr3	364951	365417	467	3.805175	365289	0.000000
333	Ca20chr3	1305600	1306043	444	3.418953	1305879	0.000000
334	Ca20chr5	809989	810569	581	3.213144	810381	0.000000
335	Ca20chr4	174105	174371	267	3.908245	174240	0.000000
336	Ca20chrR	418559	419203	645	3.648203	418936	0.000000
337	Ca20chr3	901879	902360	482	3.192711	902177	0.000000
338	Ca20chr2	1585916	1586967	1052	3.143667	1586024	0.000000
339	Ca20chr5	276540	276951	412	4.126603	276874	0.000000
340	Ca20chr2	1333948	1334388	441	4.081549	1334216	0.000000
341	Ca20chr3	1157730	1158514	785	3.281611	1158237	0.000000
342	Ca20chrR	842848	843374	527	3.955118	843003	0.000000
343	Ca20chrR	1690511	1691429	919	3.447903	1691192	0.000000
344	Ca20chr4	890656	891224	569	3.499517	890888	0.000000
345	Ca20chr1	1524317	1524611	295	3.670630	1524611	0.000000
346	Ca20chr4	1106760	1106967	208	2.907341	1106760	0.000000
347	Ca20chr2	1962594	1963084	491	3.690510	1962594	0.000000
348	Ca20chr1	386509	386744	236	3.958050	386680	0.000000
349	Ca20chr6	924445	924802	358	3.711286	924628	0.000000
350	Ca20chr3	933161	933517	357	3.577184	933368	0.000000
351	Ca20chrR	219753	220026	274	3.805785	219895	0.000000
352	Ca20chrR	1343279	1344461	1183	3.406689	1344239	0.000000
353	Ca20chr7	520128	520468	341	4.287946	520208	0.000000
354	Ca20chr5	607669	608578	910	3.434723	608497	0.000000
355	Ca20chr2	739339	739716	378	3.228487	739716	0.000000
356	Ca20chr2	1366926	1367230	305	3.567725	1367190	0.000000
357	Ca20chr6	708704	709574	871	3.973788	709494	0.000000
358	Ca20chr6	510932	511305	374	4.493545	511146	0.000000
359	Ca20chr5	472580	473347	768	3.757697	473171	0.000000
360	Ca20chr3	1240400	1240849	450	3.304576	1240849	0.000000
361	Ca20chr1	1191117	1191544	428	3.091566	1191293	0.000000
362	Ca20chr4	357543	357982	440	3.427481	357765	0.000000
363	Ca20chr1	416320	416634	315	3.766663	416548	0.000000
364	Ca20chr3	1646713	1647186	474	3.209177	1646793	0.000000
365	Ca20chr4	319313	319669	357	3.466639	319511	0.000000
366	Ca20chr7	134567	135147	581	3.350356	135024	0.000000
367	Ca20chr3	1250100	1251199	1100	3.701420	1251032	0.000000
368	Ca20chrR	1142915	1143656	742	3.193104	1142982	0.000000
369	Ca20chr5	529470	529876	407	3.563036	529780	0.000000
370	Ca20chr7	144699	145184	486	3.530726	144971	0.000000
371	Ca20chr4	522248	522519	272	4.407124	522519	0.000000
372	Ca20chr3	935638	936322	685	3.665384	936067	0.000000
373	Ca20chr3	1785286	1785675	390	3.946422	1785327	0.000000
374	Ca20chr5	592778	593341	564	3.913500	593008	0.000000
375	Ca20chr5	272717	272861	145	4.171204	272795	0.000000
376	Ca20chr6	607881	608300	420	4.056838	608146	0.000000
377	Ca20chr1	34614	35220	607	3.587530	35138	0.000000
378	Ca20chr1	1995347	1995706	360	3.491321	1995612	0.000000
379	Ca20chr6	682197	682601	405	4.173701	682601	0.000000
380	Ca20chr1	2801288	2801570	283	3.396645	2801507	0.000000
381	Ca20chr4	988281	988860	580	3.053754	988576	0.000000
382	Ca20chr4	1117820	1118037	218	3.560921	1117923	0.000000
383	Ca20chr4	1305894	1306791	898	3.825910	1305894	0.000000
384	Ca20chr2	970503	970758	256	3.572244	970503	0.000000
385	Ca20chr2	2024620	2025372	753	2.983647	2024850	0.000000
386	Ca20chr7	109541	109783	243	3.706536	109623	0.000000
387	Ca20chr4	123655	124020	366	3.560910	123937	0.000000
388	Ca20chr5	87341	87806	466	4.312666	87468	0.000000
389	Ca20chr6	925285	925565	281	3.461515	925565	0.000000
390	Ca20chr4	1334928	1335331	404	3.511336	1335067	0.000000
391	Ca20chr7	299812	300078	267	3.402020	300078	0.000000
392	Ca20chr2	1083743	1084197	455	4.209950	1084041	0.000000
393	Ca20chr2	321106	321447	342	4.389953	321265	0.000000
394	Ca20chr4	573995	574340	346	3.060155	574340	0.000000
395	Ca20chr7	401962	402407	446	3.429976	402209	0.000000
396	Ca20chr7	370103	370432	330	3.536666	370382	0.000000
397	Ca20chr7	804820	804994	175	3.795151	804900	0.000000
398	Ca20chr1	1579386	1579987	602	4.467798	1579883	0.000000
399	Ca20chr1	3167069	3167425	357	3.488561	3167273	0.000000
400	Ca20chrR	1287430	1287758	329	3.382865	1287514	0.000000
401	Ca20chr2	1665962	1666225	264	3.760742	1666036	0.000000
402	Ca20chrR	846178	846544	367	3.848759	846333	0.000000
403	Ca20chr5	1178052	1178598	547	3.467549	1178328	0.000000
404	Ca20chr5	1116036	1116479	444	3.016105	1116036	0.000000
405	Ca20chr4	682121	682403	283	3.279413	682121	0.000000
406	Ca20chr1	163850	164347	498	3.711260	164199	0.000000
407	Ca20chr2	2194856	2195564	709	3.151334	2194856	0.000000
408	Ca20chr6	147228	147531	304	4.104485	147317	0.000000
409	Ca20chr7	410473	410843	371	3.456507	410605	0.000000
410	Ca20chr4	1077828	1078013	186	3.095091	1078013	0.000000
411	Ca20chr7	294453	294910	458	4.070025	294910	0.000000
412	Ca20chr1	2618599	2618938	340	4.312543	2618758	0.000000
413	Ca20chr5	527909	528408	500	3.002961	528322	0.000000
414	Ca20chr7	365996	366449	454	4.413392	366190	0.000000
415	Ca20chr5	258749	259331	583	3.083446	258915	0.000000
416	Ca20chr2	1784586	1784834	249	4.285927	1784714	0.000000
417	Ca20chr5	523212	523472	261	3.571526	523212	0.000000
418	Ca20chr2	1458147	1458408	262	3.741865	1458328	0.000000
419	Ca20chr4	1106149	1106482	334	3.321860	1106482	0.000000
420	Ca20chr1	1991941	1992239	299	2.979566	1992123	0.000000
421	Ca20chr3	1645480	1645913	434	3.397411	1645823	0.000000
422	Ca20chr2	14508	14679	172	3.641913	14679	0.000000
423	Ca20chr1	164981	165249	269	3.899426	165201	0.000000
424	Ca20chr2	436519	436794	276	3.245337	436719	0.000000
425	Ca20chrR	518510	518792	283	3.910367	518682	0.000000
426	Ca20chr1	2102818	2103103	286	3.957795	2103052	0.000000
427	Ca20chr2	979562	979960	399	4.138865	979794	0.000000
428	Ca20chrR	440641	441275	635	4.244584	440924	0.000000
429	Ca20chr1	1364652	1365384	733	3.962629	1365200	0.000000
430	Ca20chr1	515004	515463	460	3.315539	515346	0.000000
431	Ca20chr1	1747935	1748217	283	3.466142	1748105	0.000000
432	Ca20chrR	603614	603829	216	2.719365	603614	0.000000
433	Ca20chr6	459623	460079	457	3.576319	459836	0.000000
434	Ca20chr7	376875	377186	312	3.427606	377114	0.000000
435	Ca20chr3	1056389	1056548	160	3.379346	1056548	0.000000
436	Ca20chrR	524901	525394	494	3.787592	525394	0.000000
437	Ca20chr5	72836	73187	352	3.786633	73100	0.000000
438	Ca20chr4	566337	566707	371	3.573238	566509	0.000000
439	Ca20chr1	986664	986882	219	3.858496	986772	0.000000
440	Ca20chr5	144705	144961	257	3.906430	144823	0.000000
441	Ca20chr2	594585	595080	496	3.293375	594813	0.000000
442	Ca20chr4	171824	172295	472	3.465705	171941	0.000000
443	Ca20chr4	1211246	1211664	419	3.052374	1211664	0.000000
444	Ca20chr1	973439	973780	342	3.320708	973613	0.000000
445	Ca20chr2	2196929	2197308	380	3.077107	2197011	0.000000
446	Ca20chr4	715294	715948	655	2.980944	715812	0.000000
447	Ca20chrR	731961	732217	257	3.554160	732217	0.000000
448	Ca20chr5	1061594	1062340	747	3.698536	1061731	0.000000
449	Ca20chr1	1287650	1288060	411	3.425969	1287831	0.000000
450	Ca20chr1	1784591	1785108	518	4.542107	1784850	0.000000
451	Ca20chr1	2519884	2520504	621	3.253762	2520390	0.000000
452	Ca20chr1	3075237	3075591	355	2.981097	3075365	0.000000
453	Ca20chrR	2023462	2024017	556	2.848795	2024017	0.000000
454	Ca20chr3	1545935	1546256	322	3.498876	1546150	0.000000
455	Ca20chr1	162871	163442	572	3.684998	163360	0.000000
456	Ca20chr4	259092	259253	162	3.569535	259253	0.000000
457	Ca20chr3	27782	28014	233	3.314014	28014	0.000000
458	Ca20chr6	711847	712131	285	3.120822	711961	0.000000
459	Ca20chrR	2001215	2001574	360	3.998316	2001336	0.000000
460	Ca20chr3	435364	435698	335	3.556734	435448	0.000000
461	Ca20chr2	453303	453812	510	4.679820	453574	0.000000
462	Ca20chr1	1251088	1251548	461	4.082725	1251276	0.000000
463	Ca20chr2	1203343	1203544	202	3.764155	1203463	0.000000
464	Ca20chr4	1036908	1037182	275	3.641449	1037109	0.000000
465	Ca20chr2	328563	328676	114	2.962966	328563	0.000000
466	Ca20chrR	1904660	1904872	213	3.480039	1904872	0.000000
467	Ca20chr6	56932	57291	360	3.188443	57291	0.000000
468	Ca20chrR	1031867	1032162	296	3.320515	1032036	0.000000
469	Ca20chr1	2986299	2986555	257	3.859173	2986299	0.000000
470	Ca20chr6	963343	963632	290	3.478896	963553	0.000000
471	Ca20chr2	2000243	2000487	245	4.197831	2000403	0.000000
472	Ca20chrR	2069021	2069300	280	3.562162	2069089	0.000000
473	Ca20chr7	514974	515241	268	3.671516	515107	0.000000
474	Ca20chr3	1472304	1472670	367	3.288125	1472670	0.000000
475	Ca20chr6	42625	43054	430	3.341078	42865	0.000000
476	Ca20chr5	6784	7669	886	3.152291	7486	0.000000
477	Ca20chr3	857027	857321	295	3.531592	857239	0.000000
478	Ca20chr7	906693	907037	345	3.182250	906767	0.000000
479	Ca20chr4	473711	474137	427	3.718559	473854	0.000000
480	Ca20chr6	717860	718108	249	3.752037	718108	0.000000
481	Ca20chr1	1336273	1336460	188	3.433496	1336460	0.000000
482	Ca20chr6	92393	92716	324	3.984421	92641	0.000000
483	Ca20chr2	1937206	1937529	324	2.999383	1937414	0.000000
484	Ca20chr6	616595	616790	196	3.636245	616790	0.000000
485	Ca20chr5	562991	563135	145	3.703899	563059	0.000000
486	Ca20chr4	691199	691326	128	3.583607	691199	0.000000
487	Ca20chr6	430766	431105	340	2.864341	430969	0.000000
488	Ca20chrR	2119924	2120344	421	3.469762	2120132	0.000000
489	Ca20chr4	1397321	1397606	286	3.474943	1397456	0.000000
490	Ca20chrR	1321768	1322703	936	3.291962	1322009	0.000000
491	Ca20chrR	184661	184902	242	3.327606	184661	0.000000
492	Ca20chr4	338013	338296	284	3.294704	338203	0.000000
493	Ca20chrR	593669	593944	276	3.301077	593863	0.000000
494	Ca20chrR	1084361	1084712	352	3.239415	1084453	0.000000
495	Ca20chrR	762201	762419	219	2.969984	762201	0.000000
496	Ca20chr2	1402751	1402918	168	3.928024	1402791	0.000000
497	Ca20chr5	872572	872854	283	3.326017	872660	0.000000
498	Ca20chr1	1330663	1330903	241	3.147380	1330663	0.000000
499	Ca20chr5	709447	709683	237	3.223385	709552	0.000000
500	Ca20chr3	970443	970945	503	2.764378	970698	0.000000
501	Ca20chrR	1891883	1892174	292	3.243079	1892174	0.000000
502	Ca20chrR	353217	353419	203	4.242491	353419	0.000000
503	Ca20chr3	361324	361580	257	3.943568	361324	0.000000
504	Ca20chr6	41049	41325	277	3.374400	41194	0.000000
505	Ca20chrR	1150114	1150340	227	3.904614	1150186	0.000000
506	Ca20chrR	2176554	2176929	376	2.779147	2176554	0.000000
507	Ca20chr6	324133	324455	323	3.617160	324317	0.000000
508	Ca20chrR	524054	524744	691	3.507333	524054	0.000000
509	Ca20chr3	880957	881079	123	2.802516	880957	0.000000
510	Ca20chr1	437025	437288	264	3.884469	437128	0.000000
511	Ca20chr4	560858	561088	231	3.473380	561088	0.000000
512	Ca20chr3	1790783	1791481	699	2.706299	1791312	0.000000
513	Ca20chr2	1336718	1337012	295	3.942691	1336949	0.000000
514	Ca20chr1	2520818	2521164	347	3.085628	2521003	0.000000
515	Ca20chr1	504034	504251	218	4.169384	504189	0.000000
516	Ca20chr2	693117	693611	495	2.645376	693277	0.000000
517	Ca20chr4	1177414	1177712	299	2.938693	1177616	0.000000
518	Ca20chr4	201957	202154	198	3.237633	202073	0.000000
519	Ca20chrR	174962	175227	266	3.539610	175227	0.000000
520	Ca20chr2	593321	593559	239	2.324488	593559	0.000000
521	Ca20chr1	767573	767846	274	2.647309	767799	0.000000
522	Ca20chr1	1867205	1867705	501	3.658298	1867245	0.000000
523	Ca20chr1	1332639	1333093	455	2.862281	1332639	0.000000
524	Ca20chr6	420986	421186	201	3.128888	420986	0.000000
525	Ca20chrR	2018624	2018808	185	2.909729	2018767	0.000000
526	Ca20chrR	1897230	1897477	248	2.931350	1897230	0.000000
527	Ca20chrR	1009538	1009856	319	3.191530	1009776	0.000000
528	Ca20chr5	881795	882001	207	3.197679	882001	0.000000
529	Ca20chr2	1338723	1338970	248	3.105132	1338970	0.000000
530	Ca20chr1	656035	656171	137	3.331136	656171	0.000000
531	Ca20chr5	429552	429743	192	3.215275	429552	0.000000
532	Ca20chr2	32982	33123	142	2.865776	33047	0.000000
533	Ca20chr5	751704	751838	135	3.647507	751745	0.000000
534	Ca20chr2	515053	515251	199	3.474042	515053	0.000000
535	Ca20chr5	111549	111768	220	3.553734	111768	0.000000
536	Ca20chr4	1087204	1087323	120	3.752796	1087204	0.000000
537	Ca20chr5	1074437	1074602	166	3.342481	1074437	0.000000
538	Ca20chr4	252774	253099	326	3.967095	252941	0.000000
539	Ca20chr1	295803	295997	195	3.299489	295920	0.000000
540	Ca20chr2	780592	781112	521	2.592703	781112	0.000000
541	Ca20chr2	1880789	1880987	199	2.637394	1880903	0.000000
542	Ca20chr1	2209409	2209613	205	3.098887	2209551	0.000000
543	Ca20chrR	2119250	2119591	342	3.257858	2119506	0.000000
544	Ca20chr4	719148	719443	296	3.258152	719302	0.000000
545	Ca20chr5	371	662	292	2.818862	458	0.000000
546	Ca20chr1	3163275	3163620	346	2.730532	3163620	0.000000
547	Ca20chr4	316900	317055	156	3.763599	317055	0.000000
548	Ca20chr1	268391	269052	662	3.152527	268391	0.000000
549	Ca20chr2	655305	655609	305	3.508275	655525	0.000000
550	Ca20chr1	259147	259257	111	3.402832	259187	0.000000
551	Ca20chr2	2057673	2057838	166	3.662430	2057759	0.000000
552	Ca20chr7	829867	830006	140	2.946074	830006	0.000000
553	Ca20chr5	519982	520290	309	2.963007	520290	0.000000
554	Ca20chr4	989967	990152	186	3.207868	990152	0.000000
555	Ca20chr2	314016	314314	299	3.716788	314242	0.000000
556	Ca20chr3	428889	429037	149	3.333341	428889	0.000000
557	Ca20chr7	903869	904112	244	2.714128	903941	0.000000
558	Ca20chr3	1322077	1322250	174	3.117400	1322210	0.000000
559	Ca20chr2	44058	44334	277	3.634625	44256	0.000000
560	Ca20chr7	552842	553369	528	2.830644	553369	0.000000
561	Ca20chr5	241955	242181	227	3.990125	242023	0.000000
562	Ca20chr1	650012	650237	226	2.832577	650012	0.000000
563	Ca20chr4	691719	691885	167	3.326246	691885	0.000000
564	Ca20chr5	543838	544254	417	3.250656	544117	0.000000
565	Ca20chr3	1605477	1605883	407	2.861168	1605620	0.000000
566	Ca20chr6	705932	706220	289	2.387120	705932	0.000000
567	Ca20chr7	601761	601906	146	2.755988	601906	0.000000
568	Ca20chr1	2908840	2909017	178	3.355358	2908840	0.000000
569	Ca20chr2	1641823	1641985	163	3.270376	1641985	0.000000
570	Ca20chr1	2584758	2584948	191	3.123956	2584859	0.000000
571	Ca20chr1	394784	395052	269	2.889648	394844	0.000000
572	Ca20chrR	653133	653398	266	3.500202	653224	0.000000
573	Ca20chr1	667010	667302	293	3.619443	667224	0.000000
574	Ca20chr6	20746	20965	220	3.387838	20890	0.000000
575	Ca20chr3	986230	986483	254	2.605716	986309	0.000000
576	Ca20chr1	2316030	2316187	158	2.631704	2316030	0.000000
577	Ca20chr1	3180267	3180508	242	3.522513	3180343	0.000000
578	Ca20chr4	1460641	1460814	174	2.721937	1460736	0.000000
579	Ca20chr1	1242493	1242698	206	2.148994	1242493	0.000000
580	Ca20chrR	1417624	1417895	272	3.492767	1417895	0.000000
581	Ca20chr7	846538	846697	160	3.439171	846620	0.000000
582	Ca20chr2	784811	785052	242	2.505404	784881	0.000000
583	Ca20chr3	784940	785092	153	2.959338	784989	0.000000
584	Ca20chr3	1705758	1705947	190	2.646794	1705947	0.000000
585	Ca20chr5	430421	430601	181	3.400946	430601	0.000000
586	Ca20chr7	330176	330323	148	2.723626	330252	0.000000
587	Ca20chr2	2031050	2031207	158	2.769935	2031207	0.000000
588	Ca20chr1	464861	465127	267	3.536981	465127	0.000000
589	Ca20chrR	1767312	1767516	205	2.700968	1767312	0.000000
590	Ca20chr1	1070985	1071123	139	2.529496	1071123	0.000000
591	Ca20chr2	1148991	1149267	277	3.295178	1149098	0.000000
592	Ca20chr7	491945	492150	206	3.739733	492043	0.000000
593	Ca20chr2	1917840	1917996	157	3.240500	1917996	0.000000
594	Ca20chr6	734583	734810	228	3.244238	734722	0.000000
595	Ca20chr1	3178414	3178994	581	2.647668	3178707	0.000000
596	Ca20chr7	934523	934794	272	2.783102	934523	0.000000
597	Ca20chrR	1344703	1345034	332	2.891642	1344958	0.000000
598	Ca20chr1	2106707	2106843	137	2.250581	2106843	0.000000
599	Ca20chr5	1087405	1087612	208	2.715224	1087612	0.000000
600	Ca20chrR	626156	626272	117	3.188150	626156	0.000000
601	Ca20chr5	1110822	1111010	189	2.581199	1110862	0.000000
602	Ca20chr5	236921	237058	138	3.255518	236980	0.000000
603	Ca20chr4	1338690	1338863	174	2.954932	1338796	0.000000
604	Ca20chr2	1378693	1378844	152	3.038722	1378747	0.000000
605	Ca20chrR	1750389	1750540	152	3.135701	1750540	0.000000
606	Ca20chrR	2281217	2281404	188	3.399858	2281326	0.000000
607	Ca20chr2	669257	669556	300	2.462033	669257	0.000000
608	Ca20chr1	572562	572807	246	3.338344	572807	0.000000
609	Ca20chr3	566718	566854	137	3.282098	566718	0.000000
610	Ca20chr5	109615	109743	129	3.901658	109743	0.000000
611	Ca20chr5	859600	859836	237	3.297039	859600	0.000000
612	Ca20chr2	163754	164034	281	2.735171	163885	0.000000
613	Ca20chr7	57800	57963	164	3.239514	57963	0.000000
614	Ca20chr5	293504	293702	199	3.087359	293621	0.000000
615	Ca20chr1	3179252	3179381	130	2.526928	3179252	0.000000
616	Ca20chr6	820404	820532	129	2.372871	820448	0.000000
617	Ca20chrR	177770	177908	139	3.280184	177908	0.000000
618	Ca20chr2	583347	583476	130	2.654536	583476	0.000000
619	Ca20chr7	489190	489449	260	2.704708	489334	0.000000
620	Ca20chrR	416509	416688	180	3.294254	416626	0.000000
621	Ca20chr2	1928639	1928820	182	2.479170	1928709	0.000000
622	Ca20chr4	992607	992709	103	2.701262	992709	0.000000
