# Supplementary material for: A conserved regulator controls asexual sporulation in the fungal pathogen Candida albicans
Source: Nat Commun. 2020 Dec 4;11:6224. doi: 10.1038/s41467-020-20010-9 (PMC7718266; doi:10.1038/s41467-020-20010-9)
Supplement: Supplementary file 8 — Supplementary Data 5 [file 41467_2020_20010_MOESM8_ESM.xlsx]

## Sheet: Table S5 Intersect
Chr	Start	End	Target 1	Target 2	Comments
Ca20chr2	515170	515251	N/A		3'UTR regions
Ca20chr7	599824	600758	N/A		3'UTR regions
Ca20chr7	601761	601906	N/A		3'UTR regions
Ca20chr2	970590	970758	N/A		3'UTR regions
Ca20chrR	1755608	1755813	N/A		3'UTR regions
Ca20chrR	1891883	1892174	N/A		3'UTR regions
Ca20chrR	1897230	1897477	N/A		3'UTR regions
Ca20chrR	1904660	1904872	N/A		3'UTR regions
Ca20chr1	2801288	2801570	N/A		3'UTR regions
Ca20chr1	2802905	2803165	N/A		3'UTR regions
Ca20chr1	2811882	2812265	N/A		3'UTR regions
Ca20chr1	34689	35220	orf19.6082		Binding within ORF
Ca20chrR	129444	130071	orf19.7480		Binding within ORF
Ca20chrR	176364	176907	orf19.3281		Binding within ORF
Ca20chr3	274404	274709	orf19.1724		Binding within ORF
Ca20chrR	353217	353419	orf19.2539		Binding within ORF
Ca20chr4	532338	533029	orf19.2743		Binding within ORF
Ca20chr4	555323	555592	orf19.2730		Binding within ORF
Ca20chr4	672173	672716	orf19.2671		Binding within ORF
Ca20chr4	703360	703719	orf19.3362		Binding within ORF
Ca20chr5	809989	810472	orf19.6676		Binding within ORF
Ca20chr4	845059	845578	orf19.787		Binding within ORF
Ca20chrR	848110	849161	orf19.4378		Binding within ORF
Ca20chr5	872572	872854	orf19.3215		Binding within ORF
Ca20chr3	933161	933517	orf19.5901		Binding within ORF
Ca20chr6	986792	987389	orf19.2129		Binding within ORF
Ca20chrR	993266	993652	orf19.537		Binding within ORF
Ca20chr2	1103537	1104425	orf19.3568		Binding within ORF
Ca20chr5	1176545	1176964	orf19.4045		Binding within ORF
Ca20chr5	1178052	1178598	orf19.4045		Binding within ORF
Ca20chr1	1256769	1256983	orf19.2449		Binding within ORF
Ca20chrR	1302596	1303439	orf19.3859		Binding within ORF
Ca20chr2	1614340	1614940	orf19.2190		Binding within ORF
Ca20chrR	1690737	1691429	orf19.3705		Binding within ORF
Ca20chr1	3178414	3178994	orf19.7266		Binding within ORF
Ca20chr1	3179252	3179381	orf19.7267		Binding within ORF
Ca20chr5	371	662	orf19.5700
Ca20chr5	7037	7406	orf19.5693
Ca20chr4	8297	8750	orf19.372
Ca20chr2	14508	14679	orf19.1911	orf19.1910
Ca20chr1	16134	16603	orf19.6102
Ca20chr3	27855	28014	orf19.5449	orf19.5447
Ca20chr1	33216	34289	orf19.6084
Ca20chr1	35669	36138	orf19.6082	orf19.6081
Ca20chr6	38980	39414	orf19.1189
Ca20chr6	42625	43054	orf19.1189
Ca20chr2	44058	44334	orf19.2098	orf19.2097
Ca20chr1	52105	52810	orf19.6073	orf19.6072
Ca20chr4	56099	56463	orf19.5663	orf19.5664
Ca20chr1	66559	67265	orf19.6066	orf19.6065
Ca20chr5	72836	73187	orf19.951
Ca20chrR	74750	75354	orf19.7502
Ca20chrR	77345	78177	orf19.7502
Ca20chr5	87341	87806	orf19.941
Ca20chr6	92489	92716	orf19.4210	orf19.4211
Ca20chr5	100434	101476	orf19.938
Ca20chr5	101627	102693	orf19.938
Ca20chr6	107071	107607	orf19.4201	orf19.4199
Ca20chr5	109615	109743	orf19.935
Ca20chr5	111549	111768	orf19.935
Ca20chr5	112746	113613	orf19.935
Ca20chr7	113845	114975	orf19.7053	orf19.7056
Ca20chr1	115828	116257	orf19.6038	orf19.6037
Ca20chrR	119197	119393	orf19.7485
Ca20chr3	122305	122620	orf19.5384
Ca20chr4	123655	124020	orf19.4170
Ca20chr4	128261	128737	orf19.4166	orf19.4167
Ca20chr4	130707	131109	orf19.4166	orf19.4167
Ca20chr3	132310	132726	orf19.5383
Ca20chr7	134567	135147	orf19.7046
Ca20chr7	144699	145184	orf19.7042	orf19.7043
Ca20chr6	147228	147474	orf19.3644
Ca20chr2	162604	163514	orf19.2026	orf19.2023
Ca20chr1	162871	163442	orf19.6022	orf19.6021
Ca20chr1	163850	164347	orf19.6022	orf19.6021
Ca20chr5	164338	164556	orf19.570	orf19.568
Ca20chr4	171824	172295	orf19.4699	orf19.4698
Ca20chr4	172585	172969	orf19.4699	orf19.4698
Ca20chr4	174105	174371	orf19.4699	orf19.4698
Ca20chrR	174962	175227	orf19.3282
Ca20chr5	178323	178816	orf19.577	orf19.578
Ca20chr7	182468	182982	orf19.7027
Ca20chrR	184661	184777	orf19.3278
Ca20chr3	186174	187038	orf19.6169
Ca20chr3	197546	198194	orf19.2501
Ca20chr4	201957	202154	orf19.4688
Ca20chr3	207261	207871	orf19.2506
Ca20chr3	208356	209075	orf19.2506
Ca20chrR	208721	209315	orf19.3263
Ca20chrR	219753	220026	orf19.3260	orf19.3259
Ca20chr4	230953	231392	orf19.4675
Ca20chr1	231136	231903	orf19.3302
Ca20chr3	235178	235696	orf19.158	orf19.3153
Ca20chr2	236959	237248	orf19.1989
Ca20chr4	238784	239958	orf19.4670	orf19.4673
Ca20chr5	241955	242181	orf19.1961
Ca20chr5	248004	248491	orf19.1960	orf19.1959
Ca20chr6	249803	250289	orf19.136	orf19.137
Ca20chr5	254661	255006	orf19.1959
Ca20chr4	255488	255832	orf19.4660
Ca20chr5	258812	259331	orf19.1957
Ca20chr1	259147	259257	orf19.3321
Ca20chr5	260193	260990	orf19.1957
Ca20chr3	263607	264546	orf19.1727	orf19.1728
Ca20chr1	268598	268797	orf19.3325
Ca20chr5	272717	272861	orf19.1948
Ca20chr5	276540	276874	orf19.1946	orf19.1945
Ca20chr5	279821	280454	orf19.1944
Ca20chr5	283803	283971	orf19.1943
Ca20chr6	288868	289360	orf19.3440
Ca20chr6	290255	291678	orf19.3439
Ca20chr7	294628	294910	orf19.6586
Ca20chrR	295971	297002	orf19.3230
Ca20chrR	299558	300267	orf19.3229
Ca20chr7	299812	300014	orf19.6586	orf19.6585
Ca20chr2	314016	314314	orf19.1485
Ca20chr2	315643	316294	orf19.1486
Ca20chr4	316900	317055	orf19.4632
Ca20chr4	319313	319611	orf19.4631
Ca20chr2	321106	321447	orf19.1486
Ca20chr6	324198	324455	orf19.3429
Ca20chr6	333280	334034	orf19.3425
Ca20chr4	338053	338296	orf19.4623.3
Ca20chr1	344211	344466	orf19.3358	orf19.3359
Ca20chr6	348463	349966	orf19.3422	orf19.3419
Ca20chr2	348768	349236	orf19.1497	orf19.1499
Ca20chr1	349399	349936	orf19.3360
Ca20chr1	355646	356818	orf19.4551
Ca20chr4	357601	357982	orf19.4611
Ca20chr3	364951	365417	orf19.1676	orf19.1675
Ca20chr7	365996	366449	orf19.6556	orf19.6555
Ca20chr1	370629	371322	orf19.4546	orf19.4545
Ca20chr2	377068	377596	orf19.1510
Ca20chr1	386509	386744	orf19.4536
Ca20chr2	389447	389798	orf19.1515	orf19.1516
Ca20chr1	394784	395052	orf19.4531
Ca20chr4	401257	402221	orf19.4590
Ca20chr3	407730	408225	orf19.1663	orf19.1662
Ca20chr1	410453	411158	orf19.4526
Ca20chr7	410473	410843	orf19.6529
Ca20chr1	416320	416634	orf19.4524	orf19.4523
Ca20chrR	418559	419203	orf19.2583
Ca20chr2	430236	430430	orf19.1535	orf19.1536
Ca20chr6	430766	431105	orf19.3501	orf19.3499
Ca20chr6	432166	432904	orf19.3501	orf19.3499
Ca20chr6	433365	433857	orf19.3501	orf19.3499
Ca20chr2	436519	436794	orf19.1538
Ca20chr1	438386	438658	orf19.3668
Ca20chr2	439551	440625	orf19.1539
Ca20chrR	440641	441275	orf19.2601
Ca20chr6	444446	444744	orf19.3494	orf19.3453
Ca20chr1	445547	446138	orf19.3669
Ca20chr1	447341	447605	orf19.3669
Ca20chr5	449626	449969	orf19.3171
Ca20chr1	451396	451997	orf19.3670	orf19.3672
Ca20chr7	451823	454129	orf19.6514
Ca20chr2	453303	453739	orf19.1543	orf19.1544
Ca20chr7	454749	455462	orf19.6514
Ca20chrR	455431	456157	orf19.2608
Ca20chr6	459623	460079	orf19.3460	orf19.3461
Ca20chr6	460536	461099	orf19.3461	orf19.3462
Ca20chrR	464611	465221	orf19.2614
Ca20chr1	464861	465127	orf19.3679	orf19.3680
Ca20chr5	467715	468385	orf19.3160
Ca20chr1	468387	468731	orf19.3681
Ca20chr5	472580	473347	orf19.4216
Ca20chr4	473711	474137	orf19.2767	orf19.2765
Ca20chr4	478529	479284	orf19.2767	orf19.2765
Ca20chr7	489190	489449	orf19.6488
Ca20chr7	491945	492150	orf19.6487
Ca20chr3	496369	497052	orf19.1618	orf19.1617
Ca20chr6	500955	501254	orf19.3483
Ca20chr1	504034	504189	orf19.2927
Ca20chrR	510014	510789	orf19.3740	orf19.3742
Ca20chr1	514135	514434	orf19.2929
Ca20chr7	514974	515241	orf19.6476	orf19.6475
Ca20chr1	515004	515463	orf19.2929
Ca20chr7	520128	520468	orf19.6470	orf19.6472
Ca20chr4	522288	522519	orf19.2747
Ca20chr5	523212	523472	orf19.4242
Ca20chr1	523924	524372	orf19.2937
Ca20chrR	524054	524268	orf19.3734	orf19.3733
Ca20chrR	524976	525394	orf19.3734	orf19.3733
Ca20chr5	525704	526061	orf19.4244
Ca20chr5	528153	528408	orf19.4245	orf19.4246
Ca20chr5	529470	529876	orf19.4245	orf19.4246
Ca20chr1	531907	532126	orf19.2942
Ca20chr5	543838	544254	orf19.4255	orf19.4257
Ca20chr7	553083	553369	orf19.6452	orf19.3701
Ca20chr6	556996	557514	orf19.5541
Ca20chr4	560858	561088	orf19.2726	orf19.2724
Ca20chr3	565059	565206	orf19.250
Ca20chr3	565363	565654	orf19.251
Ca20chr4	566337	566707	orf19.2726	orf19.2724
Ca20chr4	573995	574340	orf19.2723
Ca20chr4	575262	576125	orf19.2723
Ca20chr5	580552	580982	orf19.4273	orf19.4274
Ca20chr5	592855	593238	orf19.4279	orf19.4280
Ca20chr2	593321	593559	orf19.5806
Ca20chr5	593572	594085	orf19.4279	orf19.4280
Ca20chr2	594756	594861	orf19.5805
Ca20chr5	599896	600600	orf19.4282
Ca20chr1	600300	600878	orf19.2973
Ca20chrR	600935	601448	orf19.2823
Ca20chrR	606301	607001	orf19.2823
Ca20chr5	608042	608578	orf19.4288
Ca20chrR	613915	614503	orf19.2826	orf19.2827
Ca20chrR	614907	615690	orf19.2826	orf19.2827
Ca20chr6	616595	616790	orf19.5576	orf19.5578
Ca20chr1	624521	625394	orf19.2990	orf19.2991
Ca20chr4	625726	626459	orf19.2691	orf19.2690
Ca20chr1	626290	626871	orf19.2990	orf19.2991
Ca20chr5	637212	637807	orf19.4308
Ca20chr1	643171	643554	orf19.3001	orf19.3002
Ca20chr4	648737	648971	orf19.2680
Ca20chr1	650012	650122	orf19.3003.1
Ca20chr5	653984	656029	orf19.4318	orf19.4322
Ca20chrR	655412	655832	orf19.2844	orf19.2843
Ca20chr5	656392	656902	orf19.4318	orf19.4322
Ca20chr2	660798	661472	orf19.909
Ca20chr1	663788	664537	orf19.3010.1
Ca20chr6	665631	666161	orf19.5602
Ca20chr1	667010	667302	orf19.3010.1
Ca20chrR	670169	671039	orf19.2849	orf19.2850
Ca20chr6	679337	679505	orf19.5611
Ca20chr4	682121	682403	orf19.2665
Ca20chr6	682310	682485	orf19.5612
Ca20chr7	687583	688239	orf19.5136	orf19.5134
Ca20chr4	689763	690224	orf19.1440
Ca20chr5	699336	699785	orf19.4342
Ca20chr7	700857	701401	orf19.5130
Ca20chr6	705932	706220	orf19.5625	orf19.5626
Ca20chr6	708704	709574	orf19.5625	orf19.5626
Ca20chr5	710007	710398	orf19.4346	orf19.4347
Ca20chr3	710070	710871	orf19.334	orf19.335
Ca20chr6	711961	712131	orf19.5627
Ca20chr4	715294	715948	orf19.3369
Ca20chr6	717860	718108	orf19.5630	orf19.5701
Ca20chr4	719148	719302	orf19.3369
Ca20chr7	724789	725351	orf19.1344	orf19.1345
Ca20chrR	730886	731254	orf19.2398	orf19.2397.3
Ca20chrR	731961	732217	orf19.2398	orf19.2397.3
Ca20chr1	735722	736135	orf19.3050	orf19.3051
Ca20chr2	739339	739716	orf19.868
Ca20chr2	742729	743279	orf19.868
Ca20chr3	742909	743577	orf19.347	orf19.346
Ca20chr5	751704	751838	orf19.2649
Ca20chrR	770459	770975	orf19.4391
Ca20chr5	774095	775580	orf19.2638
Ca20chr7	779642	781022	orf19.6687	orf19.6688
Ca20chr4	779757	780386	orf19.1313	orf19.1311
Ca20chr3	791863	792503	orf19.6941	orf19.6942
Ca20chr2	795316	795690	orf19.846
Ca20chr3	797533	797765	orf19.6937
Ca20chr4	798243	798487	orf19.1303	orf19.1302
Ca20chr5	798437	799014	orf19.6667
Ca20chr4	798662	798772	orf19.1303	orf19.1302
Ca20chr1	801630	802011	orf19.1027	orf19.1028
Ca20chr7	804820	804994	orf19.6698	orf19.6699
Ca20chr4	811501	811939	orf19.5037	orf19.5038
Ca20chr5	822008	822459	orf19.1124.2
Ca20chr7	828740	829462	orf19.5503	orf19.5502
Ca20chrR	842924	843080	orf19.4376
Ca20chrR	846251	846476	orf19.4377
Ca20chr7	846538	846697	orf19.7196
Ca20chr3	847876	848501	orf19.2803
Ca20chr5	854940	855957	orf19.1106	orf19.1105.2
Ca20chr3	857027	857130	orf19.5854
Ca20chr4	872787	873003	orf19.5293	orf19.5294
Ca20chr5	881795	882001	orf19.3211
Ca20chr4	890656	891224	orf19.5305
Ca20chrR	897878	898249	orf19.473
Ca20chr3	901964	902260	orf19.5876	orf19.5877
Ca20chr7	908012	908296	orf19.7151	orf19.7152
Ca20chr4	910230	910936	orf19.1430
Ca20chr6	911706	912203	orf19.4553	orf19.77.1
Ca20chr3	919660	920228	orf19.5890	orf19.5892
Ca20chr6	925285	925565	orf19.1075
Ca20chr3	935855	936322	orf19.5902	orf19.5903
Ca20chr6	945855	946314	orf19.1085
Ca20chr1	946093	946868	orf19.6852
Ca20chr5	951138	951727	orf19.3912
Ca20chr6	963343	963632	orf19.1093
Ca20chr1	973439	973780	orf19.778
Ca20chr2	979562	979960	orf19.147	orf19.149
Ca20chr4	983575	984192	orf19.3829
Ca20chr1	986664	986772	orf19.769
Ca20chr4	988281	988705	orf19.3825	orf19.3826
Ca20chrR	989126	989923	orf19.535
Ca20chr1	991360	991708	orf19.768
Ca20chr2	994416	994819	orf19.193	orf19.192
Ca20chr2	1015026	1015685	orf19.4127	orf19.4125
Ca20chr5	1023127	1023414	orf19.3955	orf19.3956
Ca20chr5	1030854	1031796	orf19.3959
Ca20chr1	1036600	1037073	orf19.50	orf19.51
Ca20chr4	1036908	1037182	orf19.3801
Ca20chr3	1040844	1041859	orf19.5952	orf19.5953
Ca20chrR	1042770	1043045	orf19.6313.2
Ca20chr1	1047387	1047871	orf19.54
Ca20chr4	1056627	1057022	orf19.3794	orf19.3793
Ca20chr5	1061594	1062223	orf19.3972	orf19.3973
Ca20chr3	1072514	1073537	orf19.5965	orf19.5966
Ca20chrR	1073732	1074125	orf19.1806
Ca20chr4	1077828	1078013	orf19.3780	orf19.3781
Ca20chr2	1083743	1084119	orf19.3555	orf19.3554
Ca20chr1	1083960	1084741	orf19.4056
Ca20chr5	1085521	1086262	orf19.3983	orf19.3984
Ca20chrR	1087142	1088249	orf19.654
Ca20chr5	1087405	1087612	orf19.3983	orf19.3984
Ca20chr4	1109860	1110773	orf19.740
Ca20chr5	1113840	1114706	orf19.4000
Ca20chrR	1115839	1116429	orf19.642
Ca20chr5	1116036	1116479	orf19.4000
Ca20chr3	1121926	1122388	orf19.5994
Ca20chr3	1125459	1125828	orf19.5994
Ca20chrR	1127601	1128369	orf19.637	orf19.555
Ca20chr3	1127914	1128206	orf19.5994
Ca20chrR	1131499	1131876	orf19.556	orf19.557
Ca20chr2	1133612	1134974	orf19.6869	orf19.6871
Ca20chr5	1139213	1139763	orf19.4012
Ca20chrR	1143185	1143656	orf19.1007	orf19.1010
Ca20chr2	1147099	1147702	orf19.6874
Ca20chr2	1148991	1149188	orf19.6874
Ca20chr2	1149686	1150237	orf19.6874
Ca20chrR	1150114	1150261	orf19.5288
Ca20chrR	1151930	1153151	orf19.5288
Ca20chr5	1155864	1156173	orf19.4028	orf19.4029
Ca20chrR	1156977	1157505	orf19.5288
Ca20chr3	1157730	1158319	orf19.6003
Ca20chr2	1158252	1158996	orf19.6877
Ca20chrR	1165961	1166827	orf19.3512
Ca20chr4	1177414	1177672	orf19.1793
Ca20chr2	1187585	1189217	orf19.6893	orf19.5204
Ca20chr1	1191117	1191544	orf19.2481
Ca20chr2	1200695	1201034	orf19.5210
Ca20chr2	1203343	1203544	orf19.5210
Ca20chr3	1216015	1216586	orf19.6983
Ca20chr1	1230969	1231458	orf19.2458
Ca20chr2	1231715	1232302	orf19.4118
Ca20chr1	1251088	1251548	orf19.2452	orf19.2451
Ca20chr3	1263044	1263569	orf19.7001
Ca20chr3	1273508	1273936	orf19.7349
Ca20chr3	1275321	1275612	orf19.7349
Ca20chrR	1278136	1279061	orf19.454	orf19.451
Ca20chr2	1284111	1284706	orf19.5493	orf19.5495
Ca20chrR	1287430	1287758	orf19.3851
Ca20chr1	1287739	1287915	orf19.2432	orf19.2430
Ca20chr3	1305600	1306043	orf19.7362	orf19.7363
Ca20chrR	1314033	1314594	orf19.3867	orf19.3865
Ca20chr2	1314175	1314856	orf19.22	orf19.23
Ca20chrR	1321856	1322703	orf19.3869
Ca20chr3	1322077	1322250	orf19.7368	orf19.7369
Ca20chr4	1325036	1325426	orf19.1277
Ca20chr4	1325694	1328023	orf19.1277
Ca20chr2	1330490	1331041	orf19.30	orf19.31
Ca20chr2	1333948	1334388	orf19.33
Ca20chr4	1334928	1335184	orf19.4404	orf19.4405
Ca20chr4	1337178	1337851	orf19.4404	orf19.4405
Ca20chr1	1337352	1337727	orf19.1822	orf19.177
Ca20chr4	1338690	1338863	orf19.4404	orf19.4405
Ca20chr2	1338723	1338970	orf19.34	orf19.35
Ca20chr2	1340214	1340832	orf19.34	orf19.35
Ca20chrR	1343378	1344461	orf19.3884	orf19.3885
Ca20chrR	1344777	1345034	orf19.3884	orf19.3885
Ca20chr3	1349056	1351043	orf19.7379
Ca20chr2	1363998	1365056	orf19.1223	orf19.1224
Ca20chr1	1364652	1365384	orf19.6271	orf19.6269
Ca20chr2	1366926	1367230	orf19.1224
Ca20chrR	1370579	1371111	orf19.726	orf19.727
Ca20chr3	1373541	1374245	orf19.7385
Ca20chr2	1378693	1378844	orf19.3149
Ca20chrR	1379027	1379399	orf19.723	orf19.721
Ca20chr2	1402751	1402918	orf19.2236	orf19.2237
Ca20chrR	1417624	1417895	orf19.695	orf19.696
Ca20chr4	1444490	1445372	orf19.2892
Ca20chr2	1456580	1457339	orf19.2268	orf19.2269
Ca20chr2	1458147	1458408	orf19.2268	orf19.2269
Ca20chr4	1459087	1459385	orf19.2886
Ca20chr1	1459419	1459869	orf19.6225.1	orf19.6225
Ca20chr3	1469969	1470856	orf19.7436
Ca20chr3	1472304	1472670	orf19.7436
Ca20chr3	1473542	1474547	orf19.7436
Ca20chr4	1473946	1475476	orf19.2882	orf19.2881
Ca20chr1	1476296	1476608	orf19.6219	orf19.6217
Ca20chr1	1501566	1502064	orf19.6202
Ca20chr3	1509138	1509781	orf19.7451
Ca20chr1	1524317	1524611	orf19.4456
Ca20chrR	1532066	1532446	orf19.2356
Ca20chrR	1532986	1533666	orf19.2356
Ca20chrR	1536312	1536926	orf19.2356
Ca20chrR	1538193	1538579	orf19.2356
Ca20chr3	1546840	1547741	orf19.6824	orf19.6826
Ca20chr1	1550253	1550831	orf19.4446	orf19.4445
Ca20chr3	1550774	1551366	orf19.6822	orf19.6821
Ca20chr3	1570721	1571260	orf19.6816	orf19.6814
Ca20chr1	1577262	1577739	orf19.4438
Ca20chr1	1579386	1579987	orf19.4438
Ca20chr2	1580742	1581107	orf19.2208
Ca20chrR	1584788	1585182	orf19.6146
Ca20chr2	1585916	1586898	orf19.2204.2
Ca20chr2	1587608	1588024	orf19.2204
Ca20chr3	1588589	1589037	orf19.6805
Ca20chrR	1592234	1592669	orf19.6141	orf19.6139
Ca20chr3	1617400	1618399	orf19.6793	orf19.6792
Ca20chrR	1635640	1636073	orf19.2622
Ca20chr1	1637245	1638064	orf19.2789
Ca20chr3	1645480	1645823	orf19.6782
Ca20chr3	1646713	1647186	orf19.6782
Ca20chr2	1665962	1666225	orf19.2164.1	orf19.2219
Ca20chr2	1670289	1670888	orf19.2220
Ca20chr2	1673513	1674160	orf19.2222	orf19.2660
Ca20chrR	1676323	1676864	orf19.6282	orf19.3487
Ca20chr2	1678040	1678468	orf19.1353	orf19.1352
Ca20chrR	1703365	1703757	orf19.3710
Ca20chrR	1722143	1723399	orf19.610
Ca20chr3	1727067	1727606	orf19.6734	orf19.6736
Ca20chrR	1727121	1729198	orf19.610
Ca20chr1	1740575	1741133	orf19.5069
Ca20chr1	1742052	1742483	orf19.5069
Ca20chr2	1745478	1746048	orf19.3618
Ca20chr1	1747935	1748217	orf19.5070	orf19.5071
Ca20chr2	1784586	1784834	orf19.3599	orf19.3593
Ca20chr1	1784591	1784912	orf19.5094
Ca20chr3	1785286	1785593	orf19.6190
Ca20chr3	1790783	1791481	orf19.6191
Ca20chrR	1809943	1810982	orf19.6398	orf19.6399
Ca20chrR	1812311	1812842	orf19.6402
Ca20chr2	1829576	1831554	orf19.207
Ca20chr1	1831919	1832942	orf19.5113
Ca20chrR	1835529	1836105	orf19.6414.3	orf19.6416
Ca20chr2	1841590	1842497	orf19.204	orf19.203
Ca20chrR	1844701	1845671	orf19.6420
Ca20chr2	1864560	1864811	orf19.4069
Ca20chr1	1867205	1867592	orf19.395	orf19.396
Ca20chr1	1877490	1878324	orf19.403
Ca20chr2	1880789	1880987	orf19.4076	orf19.4077
Ca20chr2	1917840	1917996	orf19.1598	orf19.1600
Ca20chr2	1918625	1919014	orf19.1598	orf19.1600
Ca20chr2	1935406	1935854	orf19.1604	orf19.1605
Ca20chr2	1937206	1937529	orf19.1604	orf19.1605
Ca20chr1	1945937	1947168	orf19.4752	orf19.4753
Ca20chr2	1949786	1950700	orf19.1402	orf19.1401
Ca20chr2	1962750	1962921	orf19.1396
Ca20chr2	1972746	1973378	orf19.1391	orf19.1390
Ca20chr1	1981835	1982160	orf19.4765
Ca20chrR	1987774	1988515	orf19.7328	orf19.7329
Ca20chr1	1996909	1997401	orf19.4771
Ca20chr2	2000243	2000403	orf19.1372	orf19.1371
Ca20chrR	2001215	2001574	orf19.7336	orf19.7337
Ca20chr2	2005815	2006118	orf19.1369	orf19.1368
Ca20chrR	2018624	2018808	orf19.7342	orf19.7341
Ca20chrR	2023730	2024017	orf19.7342	orf19.7341
Ca20chr2	2051532	2052003	orf19.1782
Ca20chr1	2053695	2054171	orf19.4792	orf19.4793
Ca20chr2	2057673	2057838	orf19.1779	orf19.1777
Ca20chrR	2069021	2069221	orf19.6594	orf19.6592
Ca20chr1	2102818	2103103	orf19.4818
Ca20chr2	2103067	2103901	orf19.1759	orf19.1757
Ca20chr1	2106707	2106843	orf19.4820
Ca20chr2	2106817	2107783	orf19.1756
Ca20chrR	2119924	2120344	orf19.7561
Ca20chr2	2135768	2136524	orf19.1743
Ca20chrR	2155147	2155678	orf19.7578	orf19.7579
Ca20chr1	2157045	2157212	orf19.4849
Ca20chrR	2162017	2162838	orf19.7583
Ca20chrR	2176554	2176929	orf19.7592
Ca20chr1	2187747	2189552	orf19.4866
Ca20chr1	2196555	2197187	orf19.4869	orf19.4867
Ca20chr2	2196929	2197308	orf19.5343
Ca20chr1	2205958	2206310	orf19.4873
Ca20chrR	2210926	2211373	orf19.7610
Ca20chr1	2217428	2217888	orf19.4880
Ca20chr1	2222414	2223146	orf19.4883	orf19.4884
Ca20chr1	2229650	2230725	orf19.4883	orf19.4884
Ca20chr1	2233986	2234362	orf19.4884
Ca20chr1	2244287	2245025	orf19.4887	orf19.4888
Ca20chrR	2265995	2266429	orf19.7654
Ca20chrR	2281217	2281404	orf19.7664
Ca20chr1	2291190	2292091	orf19.4906
Ca20chr1	2316030	2316187	orf19.986
Ca20chr1	2347202	2348118	orf19.1830	orf19.1832
Ca20chr1	2349794	2350475	orf19.1830	orf19.1832
Ca20chr1	2423773	2424500	orf19.2317
Ca20chr1	2568150	2568829	orf19.1146	orf19.1148
Ca20chr1	2569232	2570005	orf19.1146	orf19.1148
Ca20chr1	2583404	2583847	orf19.1139	orf19.1137
Ca20chr1	2584758	2584948	orf19.1139	orf19.1137
Ca20chr1	2618599	2618938	orf19.5271	orf19.5270
Ca20chr1	2632369	2632825	orf19.5265	orf19.5263
Ca20chr1	2709503	2710058	orf19.5220
Ca20chr1	2719076	2719419	orf19.5219	orf19.69
Ca20chr1	2790518	2791426	orf19.6342	orf19.6343
Ca20chr1	2848224	2848407	orf19.4933	orf19.4934
Ca20chr1	2912854	2913249	orf19.4960
Ca20chr1	2951705	2952206	orf19.4979
Ca20chr1	2952738	2953985	orf19.4979
Ca20chr1	2975466	2975957	orf19.4991
Ca20chr1	2986299	2986555	orf19.4995
Ca20chr1	2992671	2993015	orf19.4997	orf19.4998
Ca20chr1	2998634	2998950	orf19.5000
Ca20chr1	3007957	3008354	orf19.5005
Ca20chr1	3035197	3036149	orf19.5017	orf19.5019
Ca20chr1	3159121	3159650	orf19.7244	orf19.7245
Ca20chr1	3163275	3163620	orf19.7247	orf19.7250
Ca20chr1	3167069	3167425	orf19.7251
Ca20chr1	3180267	3180508	orf19.7269
