# Supplementary material for: A conserved regulator controls asexual sporulation in the fungal pathogen Candida albicans
Source: Nat Commun. 2020 Dec 4;11:6224. doi: 10.1038/s41467-020-20010-9 (PMC7718266; doi:10.1038/s41467-020-20010-9)
Supplement: Supplementary file 9 — Supplementary Data 6 [file 41467_2020_20010_MOESM9_ESM.xlsx]

## Sheet: Table S6 Expression data
Probe ID	Gene name	Description	OE 2h FC	OE 2h ratio	OE 2h p-student	OE 4h FC	OE 4h ratio	OE 4h p-student
orf19.3512	CSP1	Putative cell wall associated protein; gene only found in C. albicans and C. dubliniensis; highly upregulated during chlamydospore development in both species; localized to chlamydospore cell wall	180.075	180.075	0.00086	43.7845	43.7845	0.0044
orf19.207	PGA55	GPI-anchored adhesin-like protein; filament induced; regulated by Nrg1, Tup1; regulated upon hyphal formation; mRNA binds to She3 and is localized to yeast-form buds and hyphal tips; induced during chlamydospore formation	110.405	110.405	0.00112	30.8677	30.8677	3.53003e-05
orf19.654	0	Predicted protein only found in C. albicans and C. dubliniensis; highly induced during chlamydospore development	105.658	105.658	0.00023	54.7542	54.7542	0.00362
orf19.555	0	Protein similar to S. cerevisiae Cis3p, which has a role cell-wall-related processes; predicted Kex2p substrate; possibly an essential gene, disruptants not obtained by UAU1 method	80.0728	80.0728	6.87806e-05	50.3499	50.3499	0.00383
orf19.6420	PGA13	GPI-anchored cell wall protein involved in cell wall synthesis; required for normal cell surface properties; induced in oralpharyngeal candidasis; Spider biofilm induced; Bcr1-repressed in RPMI a/a biofilms	54.5612	54.5612	0.00127	31.057	31.057	0.00209
orf19.4438	RME1	Zinc finger protein; controls meiosis in S. cerevisae; white-specific transcript; upregulation correlates with clinical development of fluconazole resistance; Upc2-regulated in hypoxia; flow model biofilm induced; Spider biofilm repressed	52.5756	52.5756	7.13055e-05	44.5348	44.5348	0.00176
orf19.7490	0	Predicted membrane transporter; fucose:proton symporter family member, MFS superfamily; flow model biofilm induced	40.0448	40.0448	0.00053	13.8444	13.8444	0.00034
orf19.3499	0	Secreted potein; Hap43-repressed; fluconazole-induced; regulated by Tsa1, Tsa1B under H2O2 stress conditions; induced by Mnl1p under weak acid stress; Spider biofilm induced	32.3424	32.3424	0.00537	21.9046	21.9046	0.00308
orf19.4526	HSP30	Putative heat shock protein; fluconazole repressed; amphotericin B induced; Spider biofilm induced; rat catheter biofilm induced	27.9715	27.9715	0.00615	22.1208	22.1208	0.00086
orf19.4170	CSP2	Putative cell wall associated protein; C. albicans and C. dubliniensis specific gene highly induced during chlamydospore development in both species; localized to chlamydospore cell wall; Hap43-repressed; Spider biofilm induced	24.545	24.545	0.00116	11.7709	11.7709	0.01398
orf19.2241	PST1	Putative 1,4-benzoquinone reductase; hyphal-induced; regulated by Cyr1, Ras1, Efg1, Nrg1, Rfg1, Tup1; Hap43-induced; Spider biofilm induced	23.112	23.112	0.00078	13.1971	13.1971	0.00326
orf19.2990	XOG1	Exo-1,3-beta-glucanase; 5 glycosyl hydrolase family member; affects sensitivity to chitin and glucan synthesis inhibitors; not required for yeast-to-hypha transition or for virulence in mice; Hap43-induced; Spider biofilm induced	21.8659	21.8659	0.00297	12.3509	12.3509	0.00029
orf19.2492	STE3	Protein similar to S. cerevisiae Ste3p, the receptor for a-factor mating pheromone; alpha mating-type-specific transcription	20.113	20.113	0.00225	7.70676	7.70676	0.00795
orf19.4082	DDR48	Immunogenic stress-associated protein; filamentation regulated; induced by benomyl/caspofungin/ketoconazole or in azole-resistant strain; Hog1, farnesol, alkaline repressed; stationary phase enriched; Spider, flow model biofilm induced	19.5201	19.5201	0.0016	13.8351	13.8351	0.00231
orf19.4125	PZF1	C2H2 transcription factor; Hap43-induced; rat catheter and Spider biofilm induced	19.0858	19.0858	0.01131	7.7918	7.7918	0.01479
orf19.1281	0	Putative splicing factor required for the first step of pre-mRNA splicing; Spider biofilm induced	16.3766	16.3766	0.00802	8.83901	8.83901	0.00412
orf19.6687	0	Protein of unknown function; rat catheter biofilm repressed	16.3153	16.3153	0.02912	6.04849	6.04849	0.02
orf19.3668	HGT2	Putative MFS glucose transporter; 20 member C. albicans glucose transporter family; 12 probable membrane-spanning segments; expressed in rich medium with 2% glucose; rat catheter and Spider biofilm induced	15.469	15.469	0.00601	3.42865	3.42865	0.07058
orf19.6958	ECM18	Ortholog(s) have mitochondrion localization	15.3975	15.3975	0.00377	9.29452	9.29452	0.0057
orf19.2916	0	Ortholog of C. dubliniensis CD36 : Cd36_45740, C. parapsilosis CDC317 : CPAR2_401900, Candida tenuis NRRL Y-1498 : CANTEDRAFT_116046 and Pichia stipitis Pignal : PICST_28890	14.1398	14.1398	0.04313	6.0642	6.0642	0.17061
orf19.36.1	0	Ortholog of C. parapsilosis CDC317 : CPAR2_104640 and Candida orthopsilosis Co 90-125 : CORT_0B05695	13.7431	13.7431	0.00413	11.0761	11.0761	0.00298
orf19.1344	0	Protein of unknown function; fluconazole-induced; Spider biofilm induced	13.3457	13.3457	0.02373	1.18191	1.18191	0.14121
orf19.310	0	Putative mitochondrial protein with a predicted role in cell wall biogenesis; possibly an essential gene, disruptants not obtained by UAU1 method	12.3825	12.3825	0.00793	8.17125	8.17125	0.01332
orf19.7635	DRS1	Putative nucleolar DEAD-box protein; Hap43-induced; mutation confers hypersensitivity to 5-fluorouracil (5-FU), tubercidin (7-deazaadenosine); Tbf1-induced; repressed in core stress response	12.3401	12.3401	0.00214	5.32058	5.32058	0.03075
orf19.1830	0	Protein of unknown function; Hap43-induced; rat catheter and Spider biofilm induced	11.2863	11.2863	0.00014	6.22557	6.22557	0.00896
orf19.6855	0	Ortholog of C. dubliniensis CD36 : Cd36_04370, C. parapsilosis CDC317 : CPAR2_105410, Candida tenuis NRRL Y-1498 : CANTEDRAFT_114891 and Debaryomyces hansenii CBS767 : DEHA2D13420g	10.7861	10.7861	0.0019	4.56582	4.56582	0.01077
orf19.4515	0	Predicted protein with similarity to cell wall proteins; possibly an essential gene, disruptants not obtained by UAU1 method	10.0509	10.0509	0.00386	8.98876	8.98876	0.00015
orf19.2125	0	Protein of unknown function; GlcNAc-induced protein; Spider biofilm induced; rat catheter biofilm repressed	9.88911	9.88911	0.00885	3.00475	3.00475	0.00061
orf19.6976	0	Predicted MFS membrane transporter; member of the proton coupled folate transporter/heme carrier protein family; virulence-group-correlated expression; Spider biofilm induced	9.7112	9.7112	0.00581	4.75965	4.75965	0.01955
orf19.3735	0	Protein of unknown function; induced by alpha pheromone in SpiderM medium	9.3432	9.3432	0.01768	5.55459	5.55459	0.0199
orf19.1224	FRP3	Putative ammonium transporter; upregulated in the presence of human neutrophils; fluconazole-downregulated; repressed by nitric oxide; Spider biofilm induced; rat catheter biofilm repressed	9.33793	9.33793	0.01938	5.0321	5.0321	0.00251
orf19.31	0	Ortholog of C. parapsilosis CDC317 : CPAR2_201960, C. dubliniensis CD36 : Cd36_20900, Candida tropicalis MYA-3404 : CTRG_04756 and Candida albicans WO-1 : CAWG_04394	9.09591	9.09591	0.00877	9.95102	9.95102	9.63761e-05
orf19.4527	HGT1	High-affinity MFS glucose transporter; induced by progesterone, chloramphenicol, benomyl; likely essential for growth; protein newly produced during adaptation to the serum; rat catheter and Spider biofilm induced	9.05793	9.05793	0.0248	3.07796	3.07796	0.06454
orf19.7279.1	0	Protein of unknown function; Spider biofilm induced	9.04297	9.04297	0.00442	5.20636	5.20636	0.00663
orf19.2378	0	Ortholog(s) have role in syncytium formation by plasma membrane fusion, vacuolar proton-transporting V-type ATPase complex assembly and integral to endoplasmic reticulum membrane localization	8.94739	8.94739	0.03286	5.03482	5.03482	0.00819
orf19.6688	0	Protein of unknown function; expression decreases by benomyl treatment or in an azole-resistant strain overexpressing MDR1; Spider biofilm induced	8.94119	8.94119	0.00041	14.9315	14.9315	0.00018
orf19.4504	0	Has domain(s) with predicted oxidoreductase activity, transferase activity, transferring acyl groups other than amino-acyl groups, zinc ion binding activity and role in oxidation-reduction process	8.74818	8.74818	0.00522	5.77736	5.77736	0.00183
orf19.6489	FMP45	Predicted membrane protein induced during mating; mutation confers hypersensitivity to toxic ergosterol analog, to amphotericin B; alkaline repressed; repressed by alpha pheromone in SpiderM medium; rat catheter, Spider biofilm induced	8.72633	8.72633	0.03591	10.6818	10.6818	0.00337
orf19.6580	0	Protein of unknown function; Spider biofilm induced	8.1984	8.1984	0.00715	4.40763	4.40763	0.06345
orf19.7216	YPT52	Rab-family GTPase involved in vacuolar trafficking, colocolizes with Vps1p and Ypt53p in late endosome	8.06328	8.06328	0.00219	6.42986	6.42986	0.00813
orf19.6556	0	Protein of unknown function; rat catheter, flow model and Spider biofilm induced	7.90498	7.90498	0.0011	4.53534	4.53534	0.0006
orf19.2515	0	ZZ-type zinc finger protein; rat catheter and Spider biofilm induced	7.66621	7.66621	0.0103	5.26338	5.26338	0.01283
orf19.5806	ALD5	NAD-aldehyde dehydrogenase; decreased expression in fluconazole-resistant isolate, or in hyphae; biofilm induced; fluconazole-downregulated; protein abundance is affected by URA3 expression in the CAI-4 strain; stationary phase enriched	7.56351	7.56351	0.01395	4.94465	4.94465	0.0032
orf19.6592	0	Predicted membrane transporter, member of the aromatic acid:proton symporter (AAHS) family, major facilitator superfamily (MFS)	7.56156	7.56156	0.00126	7.32413	7.32413	8.97312e-05
orf19.4682	HGT17	Putative MFS family glucose transporter; 20 members in C. albicans; 12 probable membrane-spanning segments; induced at low (0.2%, compared to 2%) glucose in rich media; Spider biofilm induced	7.55068	7.55068	0.03744	1.64339	1.64339	0.1143
orf19.6179	0	Ortholog of Candida albicans WO-1 : CAWG_03090	7.48168	7.48168	0.0355	2.86881	2.86881	0.09554
orf19.4342	SUT1	Zn2Cys6 transcription factor involved in sterol uptake; flow model biofilm induced; Spider biofilm repressed	7.46419	7.46419	0.00153	4.11304	4.11304	0.01055
orf19.2219	ORF298	Predicted ORF in retrotransposon Tca3; similar to Gag-Pol; a-specific transcript, alpha-factor induced; rat catheter biofilm repressed; mRNA binds She3	7.26668	7.26668	0.02177	4.98387	4.98387	0.0002
orf19.4873	0	Protein of unknown function; transcript regulated by white-opaque switch; flow model biofilm induced; Spider biofilm induced	7.21603	7.21603	0.04766	5.39282	5.39282	0.00057
orf19.1149	MRF1	Putative mitochondrial respiratory protein; induced by farnesol, benomyl, nitric oxide, core stress response; oxidative stress-induced via Cap1; stationary-phase enriched protein; Spider biofilm induced	7.1412	7.1412	0.00116	3.33091	3.33091	0.00585
orf19.2376	0	Has domain(s) with predicted DNA 5'-adenosine monophosphate hydrolase activity, DNA binding activity and role in DNA repair	6.41626	6.41626	0.02167	2.7825	2.7825	0.04979
orf19.1599	0	Ortholog of Candida albicans WO-1 : CAWG_06018	6.32444	6.32444	0.01576	3.43281	3.43281	0.00576
orf19.4378	PPH3	Putative catalytic subunit of protein phosphatase complex; functions with regulatory subunit Psy2p in dephosphorylation of Rad53p in response to DNA damage; dephosphorylates Rfa2p in G1 phase; ortholog of S. cerevisiae Pph3p	6.17452	6.17452	0.0174	5.73069	5.73069	0.01602
orf19.3171	ACH1	Acetyl-coA hydrolase; acetate utilization; nonessential; soluble protein in hyphae; antigenic in human; induced on polystyrene adherence; farnesol-, ketoconazole-induced; no human or murine homolog; stationary phase-enriched protein	6.11112	6.11112	0.15981	2.67824	2.67824	0.00323
orf19.6229	CAT1	Catalase; resistance to oxidative stress, neutrophils, peroxide; role in virulence; regulated by iron, ciclopirox, fluconazole, carbon source, pH, Rim101, Ssn6, Hog1, Hap43, Sfu1, Sef1, farnesol, core stress response; Spider biofilm induced	6.00957	6.00957	0.10076	5.31007	5.31007	0.00523
orf19.3475	0	Described as a Gag-related protein; hyphal induced; downregulation correlates with clinical development of fluconazole resistance; repressed by nitric oxide, 17-beta-estradiol, ethynyl estradiol	5.96456	5.96456	0.00074	3.69027	3.69027	0.00601
orf19.3924	0	Ortholog of Candida albicans WO-1 : CAWG_04810	5.77306	5.77306	0.01686	1.32964	1.32964	0.07695
orf19.2849	AQY1	Aquaporin water channel; osmotic shock resistance, WT freeze tolerance; virulent in mice; flucytosine repressed; flow model/RPMI/Spider/rat catheter biofilm induced; required for RPMI biofilm formation; Bcr1-induced in a/a RPMI biofilms	5.70945	5.70945	0.01794	1.51417	1.51417	0.06918
orf19.1302	0	Ortholog of C. dubliniensis CD36 : Cd36_43500, Spathaspora passalidarum NRRL Y-27907 : SPAPADRAFT_64619, Candida tropicalis MYA-3404 : CTRG_00335 and Candida albicans WO-1 : CAWG_03437	5.68041	5.68041	0.01683	8.73548	8.73548	0.00456
orf19.2762	AHP1	Alkyl hydroperoxide reductase; immunogenic; fluconazole-induced; amphotericin B, caspofungin, alkaline repressed; core stress response induced; Ssk1/Nrg1/Tup1/Ssn6/Hog1 regulated; flow model biofilm induced; rat catheter biofilm repressed	5.57181	5.57181	0.00082	2.08885	2.08885	0.00481
orf19.7310	0	Protein with a role in directing meiotic recombination events to homologous chromatids; induced by ciclopirox olamine; positively regulated by Sfu1; Hog1, fluconazole-repressed; Hap43-induced; Spider biofilm induced	5.40923	5.40923	0.00848	2.74228	2.74228	0.00736
orf19.7379	FAA2	Putative acyl CoA synthetase; expression regulated upon white-opaque switch; rat catheter biofilm induced; Spider biofilm induced	5.4027	5.4027	0.01559	1.61126	1.61126	0.00979
orf19.5611	0	Predicted 3-methylbutanol:NAD(P) oxidoreductase and methylglyoxal reductase (NADPH-dependent); role in ergosterol metabolic process; early stage flow model biofilm induced; Spider biofilm induced	5.32919	5.32919	0.0015	2.5423	2.5423	0.01993
orf19.3932	0	Predicted RNA binding protein; stationary phase enriched; induced in core caspofungin response; induced by nitric oxide independent of Yhb1; repressed in ssr1 null; ketoconazole, hypoxia induced; Spider biofilm induced	5.28305	5.28305	0.00424	4.55582	4.55582	0.00175
orf19.3460	0	Protein of unknown function; mRNA binds She3; transcript regulated upon yeast-hypha switch; induced in oralpharyngeal candidasis	5.20531	5.20531	0.00066	2.62276	2.62276	0.01318
orf19.6073	HMX1	Heme oxygenase; utilization of hemin iron; transcript induced by heat, low iron, or hemin; repressed by Efg1; induced by low iron; upregulated by Rim101 at pH 8; Hap43-induced; Spider and flow model biofilm induced	5.17135	5.17135	0.00836	6.68039	6.68039	0.0011
orf19.1847	ARO10	Aromatic decarboxylase; Ehrlich fusel oil pathway of aromatic alcohol biosynthesis; alkaline repressed; protein abundance affected by URA3 expression in CAI-4 strain; Spider biofilm induced	5.14506	5.14506	0.0047	2.92583	2.92583	0.01169
orf19.3544	0	Putative protein of unknown function; Hap43p-repressed gene	5.11644	5.11644	0.01301	1.83146	1.83146	0.01504
orf19.1655	PXP2	Putative acyl-CoA oxidase; enzyme of fatty acid beta-oxidation; induced during macrophage infection; opaque specific transcript; putative peroxisome targeting signal; Spider biofilm induced	5.10963	5.10963	0.03282	1.2016	1.2016	0.09731
orf19.4383	0	Ortholog(s) have DNA 5'-adenosine monophosphate hydrolase activity, mismatched DNA binding, zinc ion binding activity, role in cellular response to DNA damage stimulus and cytosol, nucleus localization	5.10221	5.10221	0.0303	3.00483	3.00483	0.03277
orf19.4688	DAG7	Secretory protein; a-specific, alpha-factor induced; mutation confers hypersensitivity to toxic ergosterol analog; fluconazole-induced; induced during chlamydospore formation in C. albicans and C. dubliniensis	4.96393	4.96393	0.00206	5.63971	5.63971	0.00064
orf19.689	PLB1	Phospholipase B; host cell penetration and virulence in mouse systemic infection; Hog1-induced; signal sequence, N-glycosylation, and Tyr phosphorylation site; induced in fluconazole-resistant strains; rat catheter biofilm repressed	4.88479	4.88479	0.07248	1.95235	1.95235	0.07274
orf19.1914	FAV3	Putative alpha-1,6-mannanase; induced by mating factor in MTLa/MTLa opaque cells	4.86699	4.86699	0.06092	2.44146	2.44146	0.0769
orf19.4970	0	Protein of unknown function; Spider biofilm induced	4.84313	4.84313	0.00167	4.54269	4.54269	0.00958
orf19.2496	ATO2	Putative fungal-specific transmembrane protein; fluconazole repressed, Hap43-repressed; flow model biofilm induced; Spider biofilm induced	4.83724	4.83724	0.05232	3.21953	3.21953	0.01356
orf19.2317	0	Protein of unknown function; induced by alpha pheromone in SpiderM medium	4.78218	4.78218	0.03802	1.68011	1.68011	0.09218
orf19.3567	BIO32	Putative class III aminotransferase with a predicted role in biotin biosynthesis; Spider biofilm induced	4.68548	4.68548	0.01056	2.60951	2.60951	0.01623
orf19.6741	0	Putative plasma membrane protein; predicted role in cell wall integrity; regulated by Nrg1, Tup1; induced during chlamydospore formation in both C. albicans and C. dubliniensis	4.67959	4.67959	0.01369	3.55078	3.55078	0.02734
orf19.3131	OYE32	NAD(P)H oxidoreductase family protein; induced by nitric oxide, amphotericin B, oxidative stress via Cap1; upregulation associated with MDR1 overexpression or benomyl treatment; macrophage-downregulated protein; Spider biofilm induced	4.67123	4.67123	0.01059	4.65685	4.65685	0.00086
orf19.5805	DLD1	Putative D-lactate dehydrogenase; white cell-specific trancript; colony morphology-related gene regulation by Ssn6; Hap43-repressed; rat catheter biofilm induced; Spider biofilm repressed	4.59172	4.59172	0.04088	2.3184	2.3184	0.0218
orf19.1368	0	Protein of unknown function; flow model biofilm induced; Spider biofilm induced	4.58425	4.58425	0.04762	1.96367	1.96367	0.01369
orf19.1600	0	Ortholog of C. dubliniensis CD36 : Cd36_23530, C. parapsilosis CDC317 : CPAR2_406140, Candida tenuis NRRL Y-1498 : CANTEDRAFT_116829 and Debaryomyces hansenii CBS767 : DEHA2B01826g	4.53184	4.53184	0.00183	2.32279	2.32279	0.00209
orf19.2165	0	Predicted hydrolase; induced by nitric oxide	4.47051	4.47051	0.00098	4.56663	4.56663	0.00743
orf19.4264	0	Protein of unknown function; induced during chlamydospore formation in both C. albicans and C. dubliniensis; flow model biofilm induced	4.42577	4.42577	0.01591	1.56006	1.56006	0.02787
orf19.2432	HAC1	bZIP transcription factor; role in unfolded protein response and control of morphology; transcript undergoes atypical splicing at C terminus under ER stress; induced during mating and by caspofungin; mRNA binds She3; Spider biofilm induced	4.41771	4.41771	0.07005	3.10146	3.10146	0.00169
orf19.1409.2	0	Protein of unknown function; Spider biofilm induced	4.36848	4.36848	0.04701	2.27116	2.27116	0.00202
orf19.822	HSP21	Small heat shock protein; role in stress response and virulence; fluconazole-downregulated; induced in cyr1 or ras1 mutant; stationary phase enriched protein; detected in some, not all, biofilm extracts; Spider biofilm induced	4.35906	4.35906	0.12529	2.57662	2.57662	0.05165
orf19.1237	ARO9	Aromatic transaminase; Ehrlich fusel oil pathway of aromatic alcohol biosynthesis; Rim101-dependent pH-regulation (alkaline induced); Hap43-induced gene	4.32351	4.32351	0.02976	3.41591	3.41591	0.02857
orf19.4907	0	Putative protein of unknown function; Hap43p-repressed gene; increased transcription is observed upon fluphenazine treatment; possibly transcriptionally regulated by Tac1p; induced by nitric oxide; fungal-specific (no human/murine homolog	4.30163	4.30163	0.00899	1.58776	1.58776	0.08236
orf19.7053	GAC1	Putative regulatory subunit of ser/thr phosphoprotein phosphatase 1; fluconazole-induced; caspofungin repressed; transcript induced by Mnl1 under weak acid stress; regulated by Nrg1, Tup1; Spider and flow model biofilm induced	4.28253	4.28253	0.0458	1.91566	1.91566	0.05082
orf19.6941	0	Putative diacylglycerol acyltransferase; catalyzes the terminal step of triacylglycerol formation; flow model biofilm induced; Spider biofilm induced	4.22452	4.22452	0.00374	3.45472	3.45472	0.01001
orf19.220	PIR1	1,3-beta-glucan-linked cell wall protein; N-mannosylated, O-glycosylated by Pmt1; cell wall defect in het mutant; Hog1/fluconazole/hypoxia induced; iron/Efg1/Plc1/temp regulated; flow model biofilm induced; hyphal, Spider biofilm repressed	4.12347	4.12347	0.07334	2.04025	2.04025	0.01466
orf19.1652	POX1-3	Predicted acyl-CoA oxidase; farnesol regulated; stationary phase enriched protein; Spider biofilm induced	4.11521	4.11521	0.10743	2.87873	2.87873	0.01724
orf19.2506	0	Protein of unknown function; opaque-specific transcript; induced during chlamydospore formation in both C. albicans and C. dubliniensis; Hog1-repressed; Spider biofilm induced	4.09714	4.09714	0.00024	2.78397	2.78397	0.00467
orf19.3733	IDP2	Isocitrate dehydrogenase; white-opaque switch regulated; morphology-regulation by Ssn6; protein in exponential and stationary phase yeast; Hap43-repressed; Spider biofilm repressed by Bcr1, Tec1, Ndt80, Rob1, Brg1; Spider biofilm induced	4.07548	4.07548	0.01125	2.38273	2.38273	0.0187
orf19.419	0	Protein of unknown function; flow model biofilm induced; Spider biofilm induced	4.02559	4.02559	0.00572	2.4765	2.4765	0.02437
orf19.113	CIP1	Possible oxidoreductase; transcript induced by cadmium but not other heavy metals, heat shock, yeast-hypha switch, oxidative stress (via Cap1), or macrophage interaction; stationary phase enriched protein; Spider biofilm induced	3.9996	3.9996	0.01529	5.92684	5.92684	0.00058
orf19.3461	0	Protein of unknown function; oxidative stress-induced via Cap1; induced by alpha pheromone in SpiderM medium	3.99313	3.99313	0.00632	8.21559	8.21559	0.00098
orf19.1486	0	Protein with a life-span regulatory factor domain; regulated by Sef1, Sfu1, and Hap43; flow model biofilm induced; Spider biofilm induced	3.98414	3.98414	0.02018	1.79535	1.79535	0.02626
orf19.5069	0	Ortholog of S. cerevisiae Sae3; meiosis specific protein involved in DMC1-dependent meiotic recombination in S. cerevisiae; Spider biofilm induced	3.97413	3.97413	0.01442	2.79053	2.79053	0.07801
orf19.1146	0	Ortholog of Candida albicans WO-1 : CAWG_00265	3.9489	3.9489	0.01286	1.72213	1.72213	0.03136
orf19.338	0	Putative glycoside hydrolase; stationary phase enriched protein; Hog1p-downregulated; shows colony morphology-related gene regulation by Ssn6p	3.91847	3.91847	0.00308	2.31393	2.31393	0.00163
orf19.742	ALD6	Putative aldehyde dehydrogenase; stationary phase enriched protein; expression regulated upon white-opaque switch; rat catheter biofilm induced; rat catheter and Spider biofilm induced	3.89308	3.89308	0.00525	2.27259	2.27259	0.00587
orf19.1233	ADE4	Putative phosphoribosylpyrophosphate amidotransferase; flucytosine induced	3.87627	3.87627	0.02225	2.82718	2.82718	0.03275
orf19.1140	0	Protein of unknown function; Spider biofilm repressed	3.83594	3.83594	0.00301	2.06619	2.06619	0.01452
orf19.2877	PDC11	Pyruvate decarboxylase; antigenic; on hyphal not yeast cell surface; Hap43, Gcn4, Efg1, Efh1, Hsf1 regulated; fluconazole, farnesol induced; amino acid starvation repressed; flow model biofilm induced; Spider biofilm repressed	3.76642	3.76642	0.01179	1.64016	1.64016	0.0755
orf19.5302	PGA31	Cell wall protein; putative GPI anchor; expression regulated upon white-opaque switch; induced by Congo Red and cell wall regeneration; Bcr1-repressed in RPMI a/a biofilms	3.7663	3.7663	0.0241	1.70981	1.70981	0.01314
orf19.7094	HGT12	Glucose, fructose, mannose transporter; major facilitator superfamily; role in macrophage-induced hyphal growth; detected at germ tube plasma membrane by mass spectrometry; Snf3p-induced; 12 probable transmembrane segments	3.74024	3.74024	0.11187	1.30671	1.30671	0.10492
orf19.4121	0	Predicted thioesterase/thiol ester dehydrase-isomerase; Spider biofilm induced	3.73467	3.73467	0.02415	1.72908	1.72908	0.01109
orf19.3439	0	Protein of unknown function; Cyr1-repressed; rat catheter and Spider biofilm induced	3.72796	3.72796	0.05119	1.91678	1.91678	0.01804
orf19.7502	0	Protein of unknown function; Hap43-induced gene; upregulated in a cyr1 null mutant; Spider biofilm induced	3.7234	3.7234	0.01027	3.08264	3.08264	0.0018
orf19.2480.1	AUT7	Putative autophagosome protein; macrophage/pseudohyphal-repressed; alternatively spliced intron in 5' UTR; Spider biofilm induced	3.68244	3.68244	0.09547	2.91896	2.91896	0.00336
orf19.5417	DOT5	Putative nuclear thiol peroxidase; alkaline downregulated; sumoylation target; Spider and flow model biofilm induced	3.67214	3.67214	0.01936	1.66591	1.66591	0.0576
orf19.7520	POT1	Putative peroxisomal 3-oxoacyl CoA thiolase; transcript regulated by Nrg1 and Mig1; farnesol regulated; Hap43-repressed	3.62365	3.62365	0.15702	3.01813	3.01813	0.00501
orf19.849	0	Ortholog(s) have role in protein N-linked glycosylation, protein O-linked glycosylation, response to stress	3.61248	3.61248	0.08935	2.16428	2.16428	0.0368
orf19.720	GST3	Glutathione S-transferase; expression regulated upon white-opaque switch; induced by human neutrophils; peroxide-induced; induced by alpha pheromone in SpiderM medium; Spider biofilm induced	3.58761	3.58761	0.01658	3.06962	3.06962	0.01449
orf19.4733	YMC2	Putative mitochondrial carrier protein; Gcn4-regulated; F-12/ CO2 early biofilm induced; Spider biofilm induced	3.50384	3.50384	0.01582	1.57437	1.57437	0.10981
orf19.7221	SET3	NAD-dependent histone deacetylase; mutations affect filamentous growth; genetic evidence suggests Set3/Hos2 function as a complex to regulate white-opaque switching, morphogenesis, and virulence; flow model biofilm induced	3.49147	3.49147	0.00204	2.33276	2.33276	0.00149
orf19.251	GLX3	Glutathione-independent glyoxalase; binds human immunoglobulin E; alkaline, fluconazole, Hog1 repressed; hypoxia, oxidative stress via Cap1, Hap43 induced; stationary-phase enriched; rat catheter, Spider biofilm induced	3.46054	3.46054	0.00798	3.81368	3.81368	0.00663
orf19.4590	RFX2	Transcriptional repressor; regulator of filamentation, response to DNA damage, adhesion, virulence in murine mucosal, systemic infections; RFX domain; regulated by Nrg1, UV-induced; partially complements S. cerevisiae rfx1 mutant defects	3.45959	3.45959	0.00917	4.11853	4.11853	0.01309
orf19.2886	CEK1	ERK-family protein kinase; required for wild-type yeast-hypha switch, mating efficiency, virulence in mice; Cst20-Hst7-Cek1-Cph1 MAPK pathway regulates mating, and invasive hyphal growth under some conditions; Spider biofilm induced	3.45431	3.45431	0.0664	3.88246	3.88246	0.00209
orf19.1288	FOX2	3-hydroxyacyl-CoA epimerase; fatty acid beta-oxidation; induced by phagocytosis; regulated by Mig1, by white-opaque switch, by DNA methylation; transcriptional activation by oleate requires Ctf1; rat catheter and Spider biofilm induced	3.43322	3.43322	0.0525	2.91202	2.91202	0.0426
orf19.2724	0	Protein of unknown function; flow model, rat catheter and Spider biofilm induced; Hap43-repressed	3.41567	3.41567	0.01921	3.84665	3.84665	0.0088
orf19.5391	0	Predicted RNA splicing and ER to Golgi transport protein; Hap43-induced gene	3.40775	3.40775	0.00564	2.25719	2.25719	0.10354
orf19.1303	0	Ortholog(s) have translation release factor activity, role in mitochondrial translational termination and mitochondrion localization	3.40372	3.40372	0.04065	2.57276	2.57276	0.00354
orf19.2936	0	Ortholog of C. parapsilosis CDC317 : CPAR2_106450, C. dubliniensis CD36 : Cd36_02330, Lodderomyces elongisporus NRLL YB-4239 : LELG_01618 and Candida orthopsilosis Co 90-125 : CORT_0B07690	3.40077	3.40077	0.00206	2.9318	2.9318	0.00032
orf19.5557	MNN4-4	Mannosyltransferase; transcript upregulated in Ssk1 response regulator mutant or in nik1 null mutant, but not in chk1 or sln1 null mutants; pheromone induced; Spider biofilm induced	3.37488	3.37488	0.02483	3.03421	3.03421	0.00204
orf19.4979	KNS1	Protein kinase involved in negative regulation of PolIII transcription; effector kinase of the TOR signaling pathway, phosphorylates Rpc53p to regulate ribosome and tRNA biosynthesis; Spider and flow model biofilm induced	3.36437	3.36437	0.00493	2.0125	2.0125	0.01312
orf19.5338	GAL4	Zn(II)2Cys6 transcription factor; involved in control of glycolysis; ortholog of S. cerevisiae Gal4, but not involved in regulation of galactose utilization genes; caspofungin repressed; Spider biofilm repressed	3.35417	3.35417	0.00127	1.92819	1.92819	0.00517
orf19.935	AGA1	Protein with some similarity to agglutinin subunit; expression regulated upon white-opaque switch; Spider biofilm induced	3.34621	3.34621	0.04819	1.71692	1.71692	0.02132
orf19.3104	YDC1	Alkaline dihydroceramidase; involved in sphingolipid metabolism; Mob2-dependent hyphal regulation; transcript is regulated by Nrg1 and Mig1; Hap43-repressed	3.3315	3.3315	0.00495	2.81682	2.81682	0.00033
orf19.6814	TDH3	NAD-linked glyceraldehyde-3-phosphate dehydrogenase; binds fibronectin, laminin; at cell surface; antigenic in infection; farnesol-repressed; stationary phase-enriched; GlcNAc-induced; flow model biofilm induced; Spider biofilm repressed	3.31706	3.31706	0.01048	2.16801	2.16801	0.02141
orf19.2691	0	Planktonic growth-induced gene	3.312	3.312	0.00057	2.14866	2.14866	0.01446
orf19.238	CCP1	Cytochrome-c peroxidase N terminus; Rim101, alkaline pH repressed; induced in low iron or by macrophage interaction; oxygen-induced activity; regulated by Sef1, Sfu1, and Hap43; Spider biofilm induced; rat catheter biofilm repressed	3.28808	3.28808	0.0022	1.94275	1.94275	0.00575
orf19.5130	PDI1	Putative protein disulfide-isomerase; antigenic in human infection; soluble protein in hyphae; induced by filamentous growth; protein present in exponential and stationary growth phase yeast cultures; flow model biofilm repressed	3.28097	3.28097	0.13434	1.97314	1.97314	0.01069
orf19.3670	GAL1	Galactokinase; galactose, Mig1, Tup1, Hap43 regulated; fluconazole, ketoconazole-induced; stationary phase enriched protein; GlcNAc-induced protein; farnesol, hypoxia-repressed in biofilm; rat catheter and Spider biofilm induced	3.26262	3.26262	0.0913	3.52938	3.52938	0.07369
orf19.2978	0	Protein of unknown function; Hap43-repressed gene	3.25671	3.25671	0.0199	2.59643	2.59643	0.04784
orf19.5005	OSM2	Putative mitochondrial fumarate reductase; regulated by Ssn6p, Gcn2p, and Gcn4p; Hog1p-downregulated; stationary phase enriched protein; Hap43p-repressed gene	3.24388	3.24388	0.03355	1.72869	1.72869	0.04971
orf19.7385	0	CCCH zinc finger protein; Spider biofilm induced	3.24003	3.24003	0.06962	3.449	3.449	0.00842
orf19.474	0	Ortholog(s) have role in mRNA export from nucleus, nuclear envelope organization, protein export from nucleus and endoplasmic reticulum, nuclear envelope localization	3.23302	3.23302	0.00749	2.18338	2.18338	0.0295
orf19.6402	CYS3	Cystathionine gamma-lyase; induced by alkaline, amphotericin B, cadmium stress, oxidative stress via Cap1; possibly adherence-induced; Hog1 regulated; reduced levels in stationary phase yeast cells; Spider and flow model biofilm induced	3.2294	3.2294	0.00348	4.14287	4.14287	0.02399
orf19.3674	GAL102	UDP-glucose 4,6-dehydratase; role in mannosylation of cell wall proteins; mutation confers hypersensitivity to toxic ergosterol analog; overlaps orf19.3673; Spider biofilm induced	3.2117	3.2117	0.07787	2.96412	2.96412	0.03573
orf19.5342.2	0	Protein of unknown function; protein newly produced during adaptation to the serum	3.20177	3.20177	0.06067	1.69919	1.69919	0.05899
orf19.7456	0	Protein of unknown function; flow model biofilm repressed	3.19075	3.19075	0.00892	2.13651	2.13651	0.00352
orf19.413	0	Protein of unknown function; induced by Sfu1; Spider biofilm induced	3.13468	3.13468	0.00293	5.06905	5.06905	0.00139
orf19.1225	PEX22	Putative peroxin	3.12345	3.12345	0.05752	1.45497	1.45497	0.07215
orf19.3434	TRY5	Zn(II)2Cys6 transcription factor; regulator of yeast form adherence; required for yeast cell adherence to silicone substrate	3.12134	3.12134	0.08838	1.08093	1.08093	0.43707
orf19.2770.1	SOD1	Cytosolic copper- and zinc-containing superoxide dismutase; role in protection from oxidative stress; required for full virulence; alkaline induced by Rim101; induced by human blood; rat catheter, flow model and Spider biofilm repressed	3.09877	3.09877	0.00805	2.57968	2.57968	0.00744
orf19.2693	GST2	Glutathione S transferase; induced by benomyl and in populations of cells exposed to fluconazole over multiple generations; regulated by Nrg1, Tup1; induced by nitric oxide; stationary phase enriched; Spider biofilm induced	3.08184	3.08184	0.00777	2.67835	2.67835	0.00206
orf19.5963	0	Putative prenyltransferase; essential gene in S. cerevisiae; Spider biofilm induced	3.07734	3.07734	0.03388	1.57661	1.57661	0.01512
orf19.3586	0	Ortholog(s) have role in fungal-type cell wall organization, vesicle-mediated transport and integral to endoplasmic reticulum membrane localization	3.07675	3.07675	0.00468	2.25774	2.25774	0.02839
orf19.1860	LSC2	Putative succinate-CoA ligase beta subunit; regulated by Mig1, Tup1; induced in high iron; protein present in exponential and stationary growth phase yeast cells; Spider biofilm repressed	3.06131	3.06131	0.0462	2.91334	2.91334	0.01521
orf19.5686	0	Protein of unknown function; Spider biofilm induced	3.03861	3.03861	0.09743	2.21614	2.21614	0.00172
orf19.4456	GAP4	Putative amino acid permease; hyphal induced; regulated by Hap43, Gcn2 and Gcn4; colony morphology-related gene regulation by Ssnp; detected at plasma membrane of yeast and germ tube by mass spec; Spider biofilm induced	3.02171	3.02171	0.00693	3.21087	3.21087	0.0018
orf19.272	FAA21	Predicted acyl CoA synthetase; upregulated upon phagocytosis; transcript regulated by Nrg1 and Mig1	3.01674	3.01674	0.01631	2.10395	2.10395	0.00403
orf19.6864	0	Putative ubiquitin-protein ligase; role in protein ubiquitination; Spider biofilm induced	3.00878	3.00878	0.11925	1.94473	1.94473	0.02396
orf19.6993	GAP2	General amino acid permease; ketoconazole, flucytosine repressed; Ssy1-dependent histidine induction; regulated by Nrg1, Tup1; colony morphology-related gene regulation by Ssn6; Spider and flow model biofilm induced	3.00475	3.00475	0.08244	1.63192	1.63192	0.16392
orf19.5495	0	Putative RNA-binding protein; induced by alpha pheromone in SpiderM medium	2.99232	2.99232	0.0002	1.83789	1.83789	0.00059
orf19.6758	0	Predcted glucose 1-dehydrogenase (NADP+); rat catheter biofilm repressed	2.9917	2.9917	0.00696	2.51432	2.51432	0.00259
orf19.3548.1	WH11	White-phase yeast transcript; expression in opaques increases virulence/switching; mutant switches as WT; Hap43, hypoxia, ketoconazol induced; required for RPMI biofilm; Bcr1-induced in RPMI a/a biofilm; rat catheter, Spider biofilm induced	2.98908	2.98908	0.04318	1.84143	1.84143	0.00389
orf19.5000	CYB2	Putative cytochrome b2 precursor; induced in high iron; alkaline repressed; colony morphology-related gene regulation by Ssn6; Hap43-repressed; pider biofilm induced	2.98776	2.98776	0.01057	2.1833	2.1833	0.03144
orf19.4258	0	Puttaive pre-mRNA polyadenylation factor; heterozygous null mutant exhibits hypersensitivity to parnafungin and cordycepin in the C. albicans fitness test	2.9857	2.9857	0.00643	1.69236	1.69236	0.04661
orf19.5645	MET15	O-acetylhomoserine O-acetylserine sulfhydrylase; sulfur amino acid synthesis; immunogenic; Hog1, adherence-induced; brown color of mutant in Pb(2+) medium a visual selection; chlamydospore formation induced, F-12/CO2 biofilm induced	2.97011	2.97011	0.01809	2.08273	2.08273	0.09176
orf19.3886	0	Ortholog of C. dubliniensis CD36 : Cd36_31820, C. parapsilosis CDC317 : CPAR2_205050, Debaryomyces hansenii CBS767 : DEHA2G10736g and Pichia stipitis Pignal : PICST_32993	2.96939	2.96939	0.00689	2.20578	2.20578	0.00327
orf19.1069	RPN4	C2H2 transcription factor; putative regulator of proteasome genes; DNA recognition sequence (GAAGGCAAAA) enriched in regions upstream of proteasome genes; induced in core stress response; Hap43-induced; Spider biofilm induced	2.96492	2.96492	0.07615	2.91297	2.91297	0.01005
orf19.918	CDR11	Putative transporter of PDR subfamily of ABC family; Gcn4-regulated; induced by Rim101 at pH 8; Spider biofilm induced	2.94737	2.94737	0.00466	2.8505	2.8505	0.02061
orf19.3172	0	Ortholog of C. dubliniensis CD36 : Cd36_51840, Candida tropicalis MYA-3404 : CTRG_05315 and Candida albicans WO-1 : CAWG_04584	2.94466	2.94466	0.00282	1.93527	1.93527	0.00131
orf19.4521	0	S. cerevisiae ortholog Env9 has similarity to oxidoreductases and is proposed to have vacuolar functions, found in lipid particles; hyphal-induced expression	2.92857	2.92857	0.0746	2.32788	2.32788	0.0014
orf19.1974	TFS1	Putative carboxypeptidase y inhibitor; transcript regulated upon yeast-hypha switch; colony morphology-related gene regulation by Ssn6	2.90978	2.90978	0.04439	2.1672	2.1672	0.00251
orf19.789	PYC2	Putative pyruvate carboxylase; binds biotin cofactor; repressed by Ssk1 response regulator, by benomyl treatment, or in an azole-resistant strain overexpressing MDR1; stationary phase enriched protein; flow model biofilm repressed	2.87368	2.87368	0.03123	2.56016	2.56016	0.01108
orf19.5204	0	Ortholog(s) have role in cellular response to methylmercury and cytoplasm, nucleus localization	2.87203	2.87203	0.00437	1.64591	1.64591	0.01655
orf19.2768	AMS1	Putative alpha-mannosidase; transcript regulated by Nrg1; induced during cell wall regeneration; flow model biofilm induced; Spider biofilm induced	2.8656	2.8656	0.08876	1.1768	1.1768	0.58164
orf19.5094	BUL1	Protein similar but not orthologous to S. cerevisiae Bul1; a protein involved in selection of substrates for ubiquitination; mutants are viable; macrophage/pseudohyphal-induced; rat catheter biofilm induced	2.8566	2.8566	0.02314	2.15728	2.15728	0.00649
orf19.5037	HRQ2	Protein of unknown function; mutants are viable; rat catheter and Spider biofilm induced	2.85247	2.85247	0.04131	2.0759	2.0759	0.00138
orf19.7610	PTP3	Putative protein tyrosine phosphatase; hypha induced; alkaline induced; regulated by Efg1, Ras1, cAMP pathways; mutants are viable; Spider biofilm induced; rat catheter biofilm repressed; flow model biofilm repressed	2.84948	2.84948	0.04679	2.92113	2.92113	0.00218
orf19.5125	0	Protein of unknown function; induced by ketoconazole; Spider, F-12/CO2 and flow model biofilm induced	2.84575	2.84575	0.02959	2.9016	2.9016	0.02621
orf19.559	FGR14	Protein encoded in retrotransposon Zorro3 with similarity to retroviral endonuclease-reverse transcriptase proteins; lacks an ortholog in S. cerevisiae; transposon mutation affects filamentous growth	2.83911	2.83911	0.06646	1.81324	1.81324	0.06471
orf19.5059	GCS1	Gamma-glutamylcysteine synthetase; glutathione synthesis, required for virulence;induced in low iron, H2O2, Cd, or presence of human neutrophils; possibly adherence-induced; Spider and F-12/CO2 biofilm induced	2.82707	2.82707	0.00451	2.43004	2.43004	0.04093
orf19.7313	SSU1	Protein similar to S. cerevisiae Ssu1 sulfite transport protein; Tn mutation affects filamentous growth; regulated by Gcn2 and Gcn4; induced by nitric oxide; Hap43-repressed; Spider and flow model biofilm induced	2.81849	2.81849	0.04844	2.00585	2.00585	0.07091
orf19.7345	0	Ortholog(s) have ATP binding activity and cytosol, nucleus localization	2.81348	2.81348	0.01219	2.19035	2.19035	0.03666
orf19.634	0	Ortholog of C. dubliniensis CD36 : Cd36_30370, Candida tropicalis MYA-3404 : CTRG_00536 and Candida albicans WO-1 : CAWG_01831	2.79523	2.79523	0.03275	1.24533	1.24533	0.04218
orf19.6840	0	Protein of unknown function; transcript detected in high-resolution tiling arrays; transcription induced by alpha pheromone in SpiderM medium; Spider and early-stage flow model biofilm induced	2.79508	2.79508	0.10113	1.77448	1.77448	0.01389
orf19.7514	PCK1	Phosphoenolpyruvate carboxykinase; glucose, C-source, yeast-hypha, Hap43 regulated; fluconazole, phagocytosis, H2O2, oral candidasis, Spider/rat catheter/flow model biofilm induced; repressed in biofilm by Bcr1, Tec1, Ndt80, Rob1, Brg1	2.77657	2.77657	0.07147	2.07651	2.07651	0.0273
orf19.4011	0	Similar to S. pombe mug180, a predicted esterase/lipase; highly induced during chlamydospore formation in both C. albicans and C. dubliniensis; flow model biofilm induced	2.77511	2.77511	0.09821	3.30806	3.30806	0.02613
orf19.7426	0	Ortholog(s) have dolichyl-diphosphooligosaccharide-protein glycotransferase activity, role in protein N-linked glycosylation via asparagine, protein complex assembly and oligosaccharyltransferase complex localization	2.76439	2.76439	0.06774	2.34753	2.34753	0.07268
orf19.5962	HGT4	Glucose and galactose sensor; fermentation, filamentation, virulence roles; 20-member glucose transporter family; extended C terminus; high-glucose repressed; macrophage induced; flow model biofilm repressed; Spider biofilm induced	2.76217	2.76217	0.01174	2.02767	2.02767	0.02525
orf19.3282	BMT3	Beta-mannosyltransferase; adds 2nd beta-mannose to the acid-stable fraction of cell wall phosphopeptidomannan, elongation of beta-mannose chains on the phosphopeptidomannan acid-labile fraction; Hap43-induced; Spider biofilm induced	2.75547	2.75547	0.05452	2.02689	2.02689	0.00055
orf19.6899	0	Putative oxidoreductase; mutation confers hypersensitivity to toxic ergosterol analog; rat catheter and Spider biofilm induced	2.75068	2.75068	0.09268	3.63004	3.63004	0.08307
orf19.2461	PRN4	Protein with similarity to pirins; induced by benomyl treatment; flow model biofilm repressed	2.73361	2.73361	0.01364	4.37061	4.37061	0.03597
orf19.1354	UCF1	Upregulated by cAMP in filamentous growth; induced in high iron, decreased upon yeast-hypha switch; downregulation correlates with clinical fluconazole resistance; Ras1-regulated; Hap43-repressed; flow model biofilm induced	2.72672	2.72672	0.10174	1.86118	1.86118	0.03431
orf19.1663	MNT2	Alpha-1,2-mannosyl transferase; adds 3rd mannose in cell-wall mannoprotein biosynthesis; partially redundant with Mnt1; role in adherence and virulence; expressed in yeast and hyphae; fungal-specific; Hap43-induced; Spider biofilm induced	2.72581	2.72581	0.0029	2.12564	2.12564	0.0009
orf19.4791	0	Protein of unknown function; Spider biofilm induced	2.72097	2.72097	0.00148	2.13075	2.13075	0.01977
orf19.5245	BUL4	Protein with a predicted BUL1 N-terminal and C-terminal domains; Bul1 binds the ubiquitin ligase Rsp5 in S. cerevisiae; Hap43-repressed gene; rat catheter biofilm induced	2.71135	2.71135	0.11065	1.63752	1.63752	0.02877
orf19.3675	GAL7	Putative galactose-1-phoshphate uridyl transferase; downregulated by hypoxia, upregulated by ketoconazole; macrophage/pseudohyphal-repressed	2.69965	2.69965	0.02104	1.88902	1.88902	0.06736
orf19.2127	CST5	Scaffold protein for the mitogen-activated protein (MAP) kinase cascade that regulates mating; required for opaque mating or white biofilm formation in response to mating pheromone; induced in response to pheromone; Hap43p-repressed	2.67717	2.67717	0.02465	2.03056	2.03056	0.00396
orf19.6514	CUP9	Transcription factor; represses SOK1 expression in response to farnesol inhibition; yeast-hypha switch repressed; ketoconazole-induced; Plc1-regulated; colony morphology-related Ssn6 regulation; Spider, flow model biofilm induced	2.6745	2.6745	0.04737	1.81672	1.81672	0.03757
orf19.3851	0	Protein of unknown function; induced by alpha pheromone in SpiderM medium	2.66956	2.66956	0.0609	1.57712	1.57712	0.01603
orf19.1144	0	Protein with SEL-1 like protein domain; early-stage flow model biofilm induced	2.66659	2.66659	0.02012	2.27806	2.27806	0.01499
orf19.3736	KAR4	Transcription factor; required for gene regulation in response to pheromones; ortholog of S. cerevisiae Kar4; role in karyogamy; opaque-specific, a-specific; induced by alpha factor	2.65835	2.65835	0.16687	1.91919	1.91919	0.0899
orf19.4255	ECM331	GPI-anchored protein; mainly at plasma membrane, also at cell wall; Hap43, caspofungin-induced; Plc1-regulated; Hog1, Rim101-repressed; colony morphology-related regulated by Ssn6; induced by ketoconazole and hypoxia	2.6564	2.6564	0.09043	2.69019	2.69019	0.00057
orf19.6679	0	Ortholog(s) have cytosol, nucleus localization	2.63547	2.63547	0.08265	2.03519	2.03519	0.01498
orf19.395	ENO1	Enolase; glycolysis and gluconeogenesis; major cell-surface antigen; binds host plasmin/plasminogen; immunoprotective; Hap43, phagocytosis induced; farnesol-repressed; flow model biofilm induced; Spider biofilm repressed; may be essential	2.62847	2.62847	0.05686	1.95158	1.95158	0.02472
orf19.5321	0	Ortholog(s) have methylenetetrahydrofolate reductase (NAD(P)H) activity and role in methionine biosynthetic process, one-carbon metabolic process	2.62826	2.62826	0.00194	1.60145	1.60145	0.06567
orf19.868	ADAEC	Protein of unknown function; transcription is specific to white cell type	2.61401	2.61401	0.12751	1.60751	1.60751	0.03945
orf19.1584	0	Predicted MFS membrane transporter; monocarboxylate porter family member; colony morphology-related gene regulation by Ssn6; flow model biofilm induced; Spider biofilm induced	2.60109	2.60109	0.01446	1.85182	1.85182	0.058
orf19.2296	0	Predicted mucin-like protein; ketoconazole-induced; fluconazole-repressed; induced in cyr1 mutant; colony morphology-related gene regulation by Ssn6; flow model biofilm induced; Spider biofilm induced	2.59929	2.59929	0.00468	1.36068	1.36068	0.11605
orf19.5026	0	C2H2 transcription factor; Spider biofilm induced	2.56986	2.56986	0.01296	2.51356	2.51356	0.02941
orf19.5994	RHB1	Putative small G protein from the Ras superfamily involved in cell wall integrity and control of filamentous growth under nitrogen starvation	2.56728	2.56728	0.04894	1.80743	1.80743	0.0603
orf19.7242	NCR1	Putative vacuolar membrane protein; predicted role in sphingolipid metabolism; transcript regulated by Nrg1 and Mig1; induced by prostaglandins	2.55374	2.55374	0.01315	1.94182	1.94182	0.00841
orf19.7504	0	Ortholog of S. cerevisiae Rts3; a component of the protein phosphatase type 2A complex; Plc1-regulated; induced in core caspofungin response; Spider biofilm induced	2.55268	2.55268	0.01724	2.59822	2.59822	0.00173
orf19.5877	ATF1	Putative alcohol acetyltransferase; caspofungin repressed; expression depends on Tac1p	2.54808	2.54808	0.0053	2.98355	2.98355	0.00665
orf19.5587	0	Protein of unknown function; transcript is upregulated in clinical isolates from HIV+ patients with oral candidiasis	2.54142	2.54142	0.00751	2.79866	2.79866	0.00082
orf19.1704	FOX3	Putative peroxisomal 3-oxoacyl CoA thiolase; transcript regulated by white-opaque switch; Spider biofilm induced	2.52912	2.52912	0.03706	1.94032	1.94032	0.00218
orf19.6637	0	Predicted glycosyl hydrolase; hypoxia induced; flow model biofilm induced	2.52626	2.52626	0.04145	1.80061	1.80061	0.01412
orf19.7481	MDH1	Mitochondrial malate dehydrogenase; regulated by Mig1, Tup1, white-opaque switch, phagocytosis; induced in high iron; antigenic during murine and human infection; repressed in Spider biofilms by Bcr1, Tec1, Ndt80, Rob1, Brg1	2.51845	2.51845	0.18355	2.20211	2.20211	0.00428
orf19.6387	HSP104	Heat-shock protein; roles in biofilm and virulence; complements chaperone, prion activity in S. cerevisiae; guanidine-insensitive; heat shock/stress induced; repressed in farnesol-treated biofilm; sumoylation target; Spider biofilm induced	2.51554	2.51554	0.03825	2.11859	2.11859	0.06978
orf19.5290	0	Protein of unknown function; repressed by Sfu1; Hap43-induced gene	2.5	2.5	0.13351	2.74979	2.74979	0.03042
orf19.1607	ALR1	Putative transporter of divalent cations; hyphal-induced expression; rat catheter biofilm induced	2.48393	2.48393	0.12022	1.96569	1.96569	0.01125
orf19.2475	PGA26	GPI-anchored adhesin-like protein of the cell wall; role in cell wall integrity; required for normal virulence; induced in high iron and during cell wall regeneration; Hap43-repressed	2.48207	2.48207	0.04312	2.04937	2.04937	0.07311
orf19.2769	0	Putative protease B inhibitor; hyphal-induced expression; Cyr1p- and Ras1p-repressed	2.46425	2.46425	0.09877	1.81213	1.81213	0.00295
orf19.4445	0	Protein of unknown function; Plc1p-regulated; expression induced early upon infection of reconstituted human epithelium (RHE), while expression of the C. dubliniensis ortholog is not; mutant is viable; Spider biofilm induced	2.46267	2.46267	0.01572	2.56605	2.56605	0.03334
orf19.3912	GLN3	GATA transcription factor, involved in regulation of nitrogen starvation-induced filamentous growth; regulates transcription of Mep2 ammonium permease; regulated by Gcn2 and Gcn4; mRNA binds She3; Spider biofilm induced	2.45584	2.45584	0.07358	2.06311	2.06311	0.0029
orf19.4282	IFH1	Transcription factor; forms a heterodimer with Fhl11 that is tethered to promoters by Tbf1; positively regulates rRNA and ribosomal protein gene transcription; Spider biofilm induced	2.44298	2.44298	0.01655	1.26148	1.26148	0.15227
orf19.751	0	Ortholog of C. dubliniensis CD36 : Cd36_04660, Candida tropicalis MYA-3404 : CTRG_04484 and Candida albicans WO-1 : CAWG_00904	2.43135	2.43135	0.02409	1.49593	1.49593	0.03783
orf19.2220	0	Protein of unknown function; Hap43-repressed gene; by Rgt1; repressed in Spider biofilms by Bcr1, Tec1, Brg1, Rob1 and induced by Efg1, Ndt80; Spider biofilm induced	2.43112	2.43112	0.03437	2.50041	2.50041	0.02785
orf19.1485	0	Mitochondrial ribosomal protein of the large subunit; rat catheter biofilm induced	2.43046	2.43046	0.04739	3.04423	3.04423	0.03006
orf19.7531	0	Protein of unknown function; stationary phase enriched protein; induced upon yeast-hypha transition; benomyl or caspofungin induced; Hap43-repressed; Spider biofilm induced	2.42805	2.42805	0.05295	1.38146	1.38146	0.0055
orf19.7032	0	Ortholog of C. dubliniensis CD36 : Cd36_70790, C. parapsilosis CDC317 : CPAR2_301530, Candida tenuis NRRL Y-1498 : CANTEDRAFT_94947 and Debaryomyces hansenii CBS767 : DEHA2A05258g	2.41269	2.41269	0.05894	2.37078	2.37078	0.0021
orf19.999	GCA2	Predicted extracellular glucoamylase; induced by ketoconazole; possibly essential, disruptants not obtained by UAU1 method; promotes biofilm matrix formation; Spider biofilm induced; Bcr1-induced in RPMI a/a biofilms	2.40789	2.40789	0.17803	1.33178	1.33178	0.07617
orf19.2903	AGO1	Putative Argonaute protein involved in RNA silencing; hyphal-induced expression; regulated by Cyr1, Ras1, Efg1, Nrg1, Tup1; rat catheter biofilm repressed	2.40648	2.40648	0.11768	1.77715	1.77715	0.01136
orf19.4980	HSP70	Putative hsp70 chaperone; role in entry into host cells; heat-shock, amphotericin B, cadmium, ketoconazole-induced; surface localized in yeast and hyphae; antigenic in host; farnesol-downregulated in biofilm; Spider biofilm induced	2.40505	2.40505	0.02175	1.6726	1.6726	0.08707
orf19.203	STB3	Putative SIN3-binding protein 3 homolog; caspofungin induced; macrophage/pseudohyphal-repressed; rat catheter biofilm induced	2.40485	2.40485	0.00207	1.48622	1.48622	0.13705
orf19.1369	0	Protein with predicted peptidase domains; Hap43-repressed gene	2.40328	2.40328	0.01209	1.72882	1.72882	0.00426
orf19.3335	0	Plasma membrane protein of unknown function; colony morphology-related gene regulation by Ssn6; repressed by nitric oxide	2.4009	2.4009	0.04803	2.81197	2.81197	0.01718
orf19.3874	0	Predicted cation transmembrane transporter; Spider biofilm induced	2.39817	2.39817	0.12976	1.50185	1.50185	0.02104
orf19.4546	HOL4	Putative ion transporter; alkaline induced by Rim101; Plc1-regulated; caspofungin repressed; rat catheter and Spider biofilm induced	2.39253	2.39253	0.14464	2.11731	2.11731	0.0447
orf19.2706	CRH11	GPI-anchored cell wall transglycosylase, putative ortholog of S. cerevisiae Crh1p; predicted glycosyl hydrolase domain; similar to Csf4p and to antigenic A. fumigatus Aspf9; predicted Kex2p substrate; caspofungin-induced	2.38589	2.38589	0.13153	2.43813	2.43813	0.02488
orf19.1990	SNX4	Putative sorting nexin; induced during the mating process	2.38334	2.38334	0.00653	1.90677	1.90677	0.01531
orf19.4377	KRE1	Cell wall glycoprotein; beta glucan synthesis; increases glucan content in S. cerevisiae kre1, complements killer toxin sensitivity; caspofungin induced; Spider/rat catheter/flow model biofilm induced; Bcr1-repressed in RPMI a/a biofilms	2.38229	2.38229	0.00157	1.72847	1.72847	0.03055
orf19.5949	FAS2	Alpha subunit of fatty-acid synthase; required for virulence in mouse systemic infection and rat oropharyngeal infection models; regulated by Efg1; fluconazole-induced; amphotericin B repressed; flow model and Spider biofilm repressed	2.37395	2.37395	0.0367	1.34622	1.34622	0.09737
orf19.633	CRG1	Methyltransferase involved in sphingolipid homeostasis, methylates a drug cantharidin; decreased expression in hyphae compared to yeast; expression regulated during planktonic growth; flow model biofilm induced; Hap43-repressed gene	2.37159	2.37159	0.05922	1.0157	1.0157	0.62654
orf19.3435	0	Ortholog of Candida albicans WO-1 : CAWG_05215	2.35331	2.35331	0.1164	1.03215	1.03215	0.55225
orf19.5293	0	Ortholog of C. dubliniensis CD36 : Cd36_43710, C. parapsilosis CDC317 : CPAR2_402940, Candida tenuis NRRL Y-1498 : CANTEDRAFT_114940 and Debaryomyces hansenii CBS767 : DEHA2C09196g	2.34976	2.34976	0.21782	1.11832	1.11832	0.15826
orf19.4274	PUT1	Putative proline oxidase; alkaline upregulated by Rim101; flow model biofilm induced; Spider biofilm induced	2.34508	2.34508	0.06534	2.11443	2.11443	0.05646
orf19.532	RBR2	Cell wall protein; expression repressed by Rim101; transcript regulated upon white-opaque switching; repressed by alpha pheromone in SpiderM medium; macrophage-induced gene	2.34069	2.34069	0.04236	1.82492	1.82492	0.07816
orf19.6254	ANT1	Peroxisomal adenine nucleotide transporter; role in beta-oxidation of medium-chain fatty acid and peroxisome proliferation; rat catheter biofilm induced	2.33414	2.33414	0.03268	1.61298	1.61298	0.05929
orf19.2738	SUL2	Putative sulfate transporter; transcript negatively regulated by Sfu1; amphotericin B induced; F-12/CO2 and Spider biofilm induced	2.32938	2.32938	0.02143	1.52606	1.52606	0.02768
orf19.6948	CCC1	Manganese transporter; required for normal filamentous growth; mRNA binds She3, localized to hyphal tips; repressed by NO, alkaline pH; colony morphology-related regulation by Ssn6; regulated by Sef1, Sfu1, Hap43; Spider biofilm induced	2.32162	2.32162	0.02437	1.96	1.96	0.00787
orf19.5339	0	Ortholog of S. cerevisiae Spg5; required for proteasome assembly during quiescence; transcript detected on high-resolution tiling arrays; Spider biofilm induced	2.31973	2.31973	0.0043	1.42108	1.42108	0.01003
orf19.3782	0	Predicted membrane transporter; member of the peptide-acetyl-coA transporter (PAT) family, major facilitator superfamily (MFS); induced by alpha pheromone in Spider medium	2.31685	2.31685	0.08998	1.85501	1.85501	0.01842
orf19.6192	0	Protein of unknown function; Plc1-regulated; transcript detected in high-resolution tiling arrays	2.3165	2.3165	0.06393	1.79571	1.79571	0.01025
orf19.2896	SOU1	Enzyme involved in utilization of L-sorbose; has sorbitol dehydrogenase, fructose reductase, and sorbose reductase activities; NAD-binding site motif; transcriptional regulation affected by chromosome 5 copy number; Hap43p-induced gene	2.31014	2.31014	0.04306	1.37352	1.37352	0.39442
orf19.1395	0	Ortholog(s) have inorganic phosphate transmembrane transporter activity, role in phosphate ion transport, transmembrane transport and mitochondrion localization	2.30474	2.30474	0.06194	2.13413	2.13413	0.01355
orf19.2734	0	Protein with a glucose/ribitol dehydrogenase family domain; mutants are viable	2.30126	2.30126	0.08228	2.73329	2.73329	0.00031
orf19.847	YIM1	Protein similar to protease of mitochondrial inner membrane; increased transcription is observed upon benomyl treatment; macrophage-downregulated gene	2.29592	2.29592	0.02835	2.13944	2.13944	0.01397
orf19.6398	0	S. pombe ortholog SPBC460.04c is a predicted sulfonate/alpha-ketoglutare dioxygenase; induced by nitric oxide; Spider biofilm induced	2.29106	2.29106	0.12822	2.03708	2.03708	0.10415
orf19.5066	0	Putative pre-60S pre-ribosomal particle subunit; essential gene; S. cerevisiae ortholog RRP17 is essential; Hap43p-induced; rat catheter biofilm induced	2.2882	2.2882	0.15029	1.84622	1.84622	0.00214
orf19.4371	TAL1	Transaldolase; protein present in exponential and stationary growth phase yeast cultures; oxidative stress-induced via Cap1; induced by nitric oxide independent of Yhb1p; sumoylation target; rat catheter biofilm repressed	2.28032	2.28032	0.00428	1.66697	1.66697	0.01082
orf19.1430	0	Ortholog of C. parapsilosis CDC317 : CPAR2_402120, C. dubliniensis CD36 : Cd36_43870, Lodderomyces elongisporus NRLL YB-4239 : LELG_04437 and Candida orthopsilosis Co 90-125 : CORT_0E02170	2.27932	2.27932	0.13684	2.37079	2.37079	0.0464
orf19.6416	0	Protein involved in N-glycosylation; Spider biofilm induced; rat catheter biofilm repressed	2.27409	2.27409	0.10338	1.45738	1.45738	0.0088
orf19.7150	NRG1	Transcription factor/repressor; regulates chlamydospore formation/hyphal gene induction/virulence and rescue/stress response genes; effects both Tup1 dependent and independent regulation; flow model biofilm induced; Spider biofilm repressed	2.2733	2.2733	0.06939	1.36176	1.36176	0.22422
orf19.3919	0	RNI-like superfamily domain-containing protein; early-stage flow model biofilm induced; Spider biofilm induced	2.25579	2.25579	0.09391	1.48339	1.48339	0.01816
orf19.1862	0	Possible stress protein; increased transcription associated with CDR1 and CDR2 overexpression or fluphenazine treatment; regulated by Sfu1, Nrg1, Tup1; stationary phase enriched protein; Spider biofilm induced	2.25048	2.25048	0.08152	1.23238	1.23238	0.09546
orf19.3351	0	Protein of unknown function; Hap43-induced; Spider biofilm induced	2.24882	2.24882	0.00469	2.91791	2.91791	4.22072e-05
orf19.1822	UME6	Zn(II)2Cys6 transcription factor; role in hyphal extension, virulence, adherence to plastic; rat catheter biofilm induced; has a long 5'-UTR that regulates translational efficiency and controls transition to filamentous growth	2.24296	2.24296	0.01923	1.41109	1.41109	0.00473
orf19.2613	ECM4	Cytoplasmic glutathione S-transferase; regulated by Nrg1, Tup1; induced in core stress response, in cyr1 or ras1 mutant (yeast or hyphal cells); Tn mutation affects filamentous growth; stationary phase enriched; Spider biofilm induced	2.24283	2.24283	0.02387	1.03384	1.03384	0.36064
orf19.4818	0	Protein of unknown function; Spider biofilm induced	2.23955	2.23955	0.01526	1.53177	1.53177	0.02682
orf19.4281	#N/A	#N/A	2.23126	2.23126	0.0448	1.84304	1.84304	0.01188
orf19.4591	CAT2	Major carnitine acetyl transferase; intracellular acetyl-CoA transport; localized in peroxisomes and mitochondria; induced in macrophages; Hog1-repressed; stationary phase enriched; farnesol-upregulated in biofilm; Spider biofilm induced	2.22863	2.22863	0.02454	2.77042	2.77042	0.01947
orf19.6323	HPA2	Ortholog(s) have D-amino-acid N-acetyltransferase activity, role in D-amino acid metabolic process and cytosol, nucleus localization	2.22667	2.22667	0.0042	1.88683	1.88683	0.03662
orf19.3925	0	Putative protein of unknown function, transcription is activated in the presence of elevated CO2	2.22542	2.22542	0.10966	1.27771	1.27771	0.07617
orf19.647.3	0	Protein of unknown function; Spider biofilm induced	2.22446	2.22446	0.21842	1.54065	1.54065	0.28039
orf19.192	0	Ortholog of C. dubliniensis CD36 : Cd36_19320, C. parapsilosis CDC317 : CPAR2_209670, Candida tenuis NRRL Y-1498 : CANTEDRAFT_113478 and Debaryomyces hansenii CBS767 : DEHA2C15136g	2.21802	2.21802	0.04241	1.60687	1.60687	0.01961
orf19.769	IFE1	Putative medium-chain alcohol dehydrogenase; rat catheter and Spider biofilm repressed	2.21801	2.21801	0.06955	2.5912	2.5912	0.00339
orf19.252	0	Protein of unknown function; S. cerevisiae ortholog Fmp37 which localizes to mitochondria; Hap43-repressed; Spider biofilm repressed	2.21611	2.21611	0.14865	1.81504	1.81504	0.06151
orf19.2599	CRC1	Mitochondrial carnitine carrier protein	2.21311	2.21311	0.05164	1.78875	1.78875	0.0155
orf19.3672	GAL10	UDP-glucose 4-epimerase; galactose utilization; mutant has cell wall defects and increased filamentation; GlcNAc-, fluconazole- and ketoconazole-induced; stationary phase enriched protein; rat catheter and flow model biofilm induced	2.20869	2.20869	0.02806	2.65175	2.65175	0.07466
orf19.5683	0	Putative integral membrane protein of unknown function; clade-associated gene expression; Spider biofilm induced	2.20237	2.20237	0.00648	2.59492	2.59492	0.00233
orf19.304	0	Putative transporter similar to MDR proteins; fungal-specific; Spider biofilm induced	2.20095	2.20095	0.21707	1.2955	1.2955	0.05999
orf19.1891	APR1	Vacuolar aspartic proteinase; transcript equivalent in yeast-form and mycelial cells but is elevated at lower growth temperatures; upregulated iby human neutrophils; protein enriched in stationary phase; Spider biofilm induced	2.19881	2.19881	0.09909	1.78835	1.78835	0.01222
orf19.979	FAS1	Beta subunit of fatty-acid synthase; multifunctional enzyme; Hap43, fluconazole-induced; amphotericin B, caspofungin repressed; macrophage/pseudohyphal-induced; flow model and Spider biofilm repressed	2.19878	2.19878	0.02516	1.25365	1.25365	0.24894
orf19.1666	0	Ortholog of Dig2, a MAP kinase-responsive inhibitor of Ste12; regulates mating-specific genes and invasive growth in S. cerevisiae; induced by alpha pheromone in SpiderM medium	2.19814	2.19814	0.0125	1.36349	1.36349	0.12119
orf19.5286	YCP4	Putative flavodoxin; flow model, rat catheter and Spider biofilm repressed	2.19546	2.19546	0.23572	1.45555	1.45555	0.02073
orf19.4026	HIS1	ATP phosphoribosyl transferase; enzyme of histidine biosynthesis; acid upregulated/alkaline repressed by Rim101; regulated by Gcn2, Gcn4; strain CA9 is a his1 mutant; flow model biofilm induced; Spider biofilm repressed	2.18802	2.18802	0.00971	2.67839	2.67839	0.00218
orf19.7056	0	Putative protein of unknown function; transcript is upregulated in clinical isolates from HIV+ patients with oral candidiasis; regulated by Sef1, Sfu1, and Hap43	2.18761	2.18761	0.14741	2.13497	2.13497	0.07141
orf19.1089	PEX11	Putative peroxisomal membrane protein; role in fatty acid oxidation; expression is Tac1-regulated; Hms1p-dependent induction by geldamycin; Spider biofilm induced	2.185	2.185	0.05745	1.78522	1.78522	0.0073
orf19.6852.1	0	Protein of unknown function; Spider biofilm induced	2.1796	2.1796	0.13153	1.771	1.771	0.01602
orf19.5633	0	F-box domain-containing protein; flow model biofilm induced	2.17883	2.17883	0.01737	1.56684	1.56684	0.14304
orf19.2608	ADH5	Putative alcohol dehydrogenase; regulated by white-opaque switch; fluconazole-induced; antigenic in murine infection; regulated by Nrg1, Tup1; Hap43, macrophage repressed, flow model biofilm induced; Spider biofilm induced	2.17864	2.17864	0.02789	1.84666	1.84666	0.05595
orf19.4135	PRC2	Putative carboxypeptidase; induced by human neutrophils; Spider biofilm induced	2.17812	2.17812	0.00507	2.25554	2.25554	0.0151
orf19.3997	ADH1	Alcohol dehydrogenase; oxidizes ethanol to acetaldehyde; at yeast cell surface; immunogenic in humans/mice; complements S. cerevisiae adh1 adh2 adh3 mutant; fluconazole, farnesol-induced; flow model biofilm induced; Spider biofilm repressed	2.17396	2.17396	0.13827	1.61648	1.61648	0.02346
orf19.3521	ARH2	Putative adrenodoxin-NADPH oxidoreductase; role in heme biosynthesis	2.16993	2.16993	0.12219	1.80698	1.80698	0.20636
orf19.7127	TLO16	Member of a family of telomere-proximal genes of unknown function; may be spliced in vivo	2.16887	2.16887	0.02761	1.50567	1.50567	0.03982
orf19.5773	0	Putative dipeptidyl-peptidase III; protein detected by mass spec in exponential and stationary phase cultures; Hog1p-induced; clade-associated gene expression	2.1672	2.1672	0.02605	1.90708	1.90708	0.00443
orf19.1150	0	GATA-like transcription factor; oral infection induced; mutant has reduced capacity to damage oral epithelial cells; regulated by Gcn2 and Gcn4; Spider biofilm induced	2.16697	2.16697	0.01435	1.60198	1.60198	0.06182
orf19.5615	AYR2	Putative NADPH-dependent 1-acyl dihydroxyacetone phosphate reductase; shows colony morphology-related gene regulation by Ssn6p	2.16481	2.16481	0.00842	-1.02127	0.97917	0.61579
orf19.4864	0	Ortholog(s) have acylglycerol lipase activity, serine hydrolase activity, role in triglyceride metabolic process and lipid particle, mitochondrial outer membrane, plasma membrane localization	2.15714	2.15714	0.0566	1.52045	1.52045	0.07739
orf19.6315	0	Ortholog of C. dubliniensis CD36 : Cd36_30140, C. parapsilosis CDC317 : CPAR2_204040, Candida tenuis NRRL Y-1498 : CANTEDRAFT_114703 and Debaryomyces hansenii CBS767 : DEHA2G22880g	2.15706	2.15706	0.05374	1.71968	1.71968	0.02035
orf19.2995	0	Protein of unknown function; induced by nitric oxide; rat catheter and Spider biofilm induced	2.14825	2.14825	0.17955	1.43349	1.43349	0.00252
orf19.5576	0	Putative pantothenate kinase; ortholog of S. cerevisiae Cab1; transposon mutation affects filamentous growth; repressed in core stress response	2.14673	2.14673	0.05797	1.32537	1.32537	0.07366
orf19.5140	0	Protein of unknown function; rat catheter and Spider biofilm induced	2.14182	2.14182	0.00728	1.63722	1.63722	0.09072
orf19.802	UGA1	Putative GABA transaminase; transcription regulated by Mig1 and Tup1; stationary phase enriched protein; rat catheter and Spider biofilm induced	2.12906	2.12906	0.01222	2.26278	2.26278	0.00265
orf19.2701	0	Protein of unknown function; Ras1 and Cyr1 repressed; rat catheter and Spider biofilm induced	2.12754	2.12754	0.01659	1.66992	1.66992	0.0024
orf19.4476	0	Protein with a NADP-dependent oxidoreductase domain; transcript induced by ketoconazole; rat catheter and Spider biofilm induced	2.11975	2.11975	0.02255	1.73811	1.73811	0.04399
orf19.3684	0	Putative oxidoreductase; Spider biofilm induced	2.11863	2.11863	0.0796	2.08749	2.08749	0.00503
orf19.232	0	RNA polymerase II mediator complex subunit; possibly an essential gene, disruptants not obtained by UAU1 method	2.11192	2.11192	0.0241	2.23261	2.23261	6.56107e-05
orf19.4279	MNN1	Putative alpha-1,3-mannosyltransferase; of the mannosyltransferase complex; negatively regulated by Rim101; transcript elevated in chk1 and nik1 mutants, but not in sln1 mutant; Spider and flow model biofilm induced	2.1112	2.1112	0.07345	1.43193	1.43193	0.00575
orf19.4789	0	Has domain(s) with predicted metal ion binding activity	2.11116	2.11116	0.50977	-1.01793	0.98239	0.50315
orf19.1826	MDM34	Putative zinc finger transcription factor; macrophage-downregulated; flow model biofilm induced; flow model and Spider biofilm induced	2.10365	2.10365	0.00049	2.08668	2.08668	0.02917
orf19.4234	0	Protein of unknown function; Hap43-induced gene; Ctr86 ortholog in S. cerveisiae is essential; Spider biofilm induced	2.10349	2.10349	0.0424	1.73495	1.73495	0.13485
orf19.5112	TKL1	Putative transketolase; localizes to surface of yeast cells, not hyphae; soluble protein in hyphae; transcript regulated by Nrg1, Mig1, and Tup1; antigenic in human or murine infection; possibly essential (by UAU1 method)	2.1032	2.1032	0.0459	1.48089	1.48089	0.03725
orf19.1159	0	Protein similar to A. nidulans CysA serine O-trans-acetylase; suggests that C. albicans uses an O-acetyl-serine (OAS) pathway of sulfur assimilation; F-12/CO2 early biofilm induced; Spider biofilm induced	2.09977	2.09977	0.004	1.32541	1.32541	0.00047
orf19.4906	0	Putative adhesin-like protein; positively regulated by Tbf1; Spider biofilm induced	2.09027	2.09027	0.01552	1.5922	1.5922	0.01307
orf19.3769	0	Ortholog(s) have zinc ion transmembrane transporter activity, role in zinc ion transport and endoplasmic reticulum localization	2.08887	2.08887	0.00282	1.90545	1.90545	0.00069
orf19.6554	0	Regulator of calcineurin; regulated by calcineurin-Crz1 pathway; feedback regulator of calcineurin-dependent signaling; Hap43-repressed; induced by ketoconazole, hypoxia, during growth in the mouse cecum; Spider biofilm induced	2.08732	2.08732	0.01078	1.46849	1.46849	0.04178
orf19.7021	GPH1	Putative glycogen phosphorylase; role in glycogen metabolism; regulated by Ssk1, Mig1, Tup1, Hap43; fluconazole-induced; localizes to cell surface of hyphae, not yeast; stationary phase enriched protein; Spider biofilm induced	2.06918	2.06918	0.05466	1.76055	1.76055	0.09151
orf19.3429	FGR47	Protein lacking an ortholog in S. cerevisiae; transposon mutation affects filamentous growth	2.06901	2.06901	0.05692	1.75002	1.75002	0.01085
orf19.3029	EHD3	Predicted 3-hydroxyisobutyryl-CoA hydrolase; mitochondrially localized; Spider biofilm induced	2.06819	2.06819	0.04171	2.10869	2.10869	0.02674
orf19.4147	GLR1	Glutathione reductase; upregulated by human neutrophils; oxidative stress-induced regulation via Cap1p; overexpression correlates with multidrug resistance in a cap1 mutant, farnesol induced; stationary phase enriched protein	2.06292	2.06292	0.00136	2.66329	2.66329	0.01138
orf19.2444	CHS7	Protein required for wild-type chitin synthase III activity; similar to (but not functional homolog of) S. cerevisiae Chs7p, which effects ER export of Chs3p; induced cyr1 mutant hyphae and ras1 yeast-form cells; Spider biofilm induced	2.06181	2.06181	0.03232	1.8757	1.8757	0.00124
orf19.606	0	Protein of unknown function; Hap43-induced; Spider biofilm induced	2.06138	2.06138	0.02643	1.58669	1.58669	0.00268
orf19.5876	0	Protein of unknown function; Cyr1-repressed; induced by alpha pheromone in SpiderM medium; rat catheter and Spider biofilm induced	2.06026	2.06026	0.08196	1.74676	1.74676	0.00045
orf19.1505	0	Ortholog(s) have cytoplasm localization	2.05794	2.05794	0.00522	1.49823	1.49823	0.10763
orf19.734	GLK1	Putative glucokinase; transcript regulated upon yeast-hyphal switch; Efg1 regulated; fluconazole-induced; induced in core stress response; colony morphology-related gene regulation by Ssn6; GlcNAc-induced protein	2.05479	2.05479	0.00234	1.22666	1.22666	0.14937
orf19.1943	0	Ortholog of C. parapsilosis CDC317 : CPAR2_302610, C. dubliniensis CD36 : Cd36_51070, Candida orthopsilosis Co 90-125 : CORT_0E04770 and Spathaspora passalidarum NRRL Y-27907 : SPAPADRAFT_50634	2.05315	2.05315	0.0673	1.32965	1.32965	0.08619
orf19.1476	0	Ortholog(s) have mRNA (N6-adenosine)-methyltransferase activity, role in mRNA methylation, meiosis, negative regulation of pseudohyphal growth and MIS complex localization	2.04418	2.04418	0.06458	1.41601	1.41601	0.04862
orf19.7152	0	Protein similar to Aspergillus CYSK O-acetylserine sulfhydrylase, suggesting that C. albicans uses an O-acetyl-serine (OAS) pathway of sulfur assimilation; upregulated in biofilm; protein level decreases in stationary phase cultures	2.03993	2.03993	0.10838	1.48169	1.48169	0.00413
orf19.5100	MLT1	Vacuolar membrane transporter; MRP subfamily of ABC family; may transport organic anions conjugated to glutathione, glucuronate, or sulfate; needed for virulence in mouse peritonitis; Spider biofilm induced; flow model biofilm repressed	2.03525	2.03525	0.00152	1.70826	1.70826	0.06717
orf19.3089	0	Predicted mitochondrial intermembrane space protein; predicted role in phospholipid metabolism; rat catheter and Spider biofilm induced	2.03477	2.03477	0.077	1.67657	1.67657	0.00194
orf19.6066	0	Hexadecenal dehydrogenase; involved in the conversion of sphingosine 1-phosphate breakdown product hexadecenal to hexadecenoic acid; Spider biofilm induced	2.03021	2.03021	0.03964	2.29767	2.29767	0.0107
orf19.1785	0	Protein with a PI31 proteasome regulator domain; Hap43-repressed; flow model biofilm induced	2.03002	2.03002	0.17984	1.32843	1.32843	0.11952
orf19.6287	AAT21	Putative aspartate aminotransferase; stationary phase enriched protein; Gcn4-regulated; Spider biofilm induced	2.02872	2.02872	0.10103	1.28197	1.28197	0.14088
orf19.2192	GDH2	Putative NAD-specific glutamate dehydrogenase; fungal-specific; transcript regulated by Nrg1, Mig1, Tup1, and Gcn4; stationary phase enriched protein; flow model biofilm induced; Spider biofilm induced	2.02546	2.02546	0.11259	1.43032	1.43032	0.17327
orf19.6176	SEC61	ER protein-translocation complex subunit; essential; 10 predicted transmembrane regions; chimeric mutant partially functionally complements S. cerevisiae sec61 defects; Spider biofilm repressed	2.02165	2.02165	0.06777	1.35279	1.35279	0.01684
orf19.4795	0	Protein of unknown function; Sef1-, Sfu1-, and Hap43 regulated; Spider biofilm induced	2.02026	2.02026	0.04347	2.53977	2.53977	0.00124
orf19.909	STP4	C2H2 transcription factor; induced in core caspofungin response; colony morphology-related gene regulation by Ssn6; induced by 17-beta-estradiol, ethynyl estradiol; rat catheter and Spider biofilm induced	2.01987	2.01987	0.13142	1.54418	1.54418	0.05788
orf19.1203.1	0	Predicted dolichol-phosphate mannosyltransferase subunit; flow model and Spider biofilm repressed	2.01947	2.01947	0.01663	1.39284	1.39284	0.10819
orf19.5024	GND1	6-phosphogluconate dehydrogenase; soluble in hyphae; farnesol, macrophage-induced protein; antigenic in mice; dual localization to cytosol and peroxisomes depends on alternative splicing; rat catheter and Spider biofilm repressed	2.01609	2.01609	0.07288	1.52715	1.52715	0.03054
orf19.811	0	Protein of unknown function; mutant is viable; Hap43-repressed	2.01345	2.01345	0.24302	1.31265	1.31265	0.00995
orf19.2646	ZCF13	Predicted Zn(II)2Cys6 transcription factor; similar to but not the true ortholog of S. cerevisiae Hap1; mutants display decreased colonization of mouse kidneys	2.00866	2.00866	0.04582	1.479	1.479	0.08185
orf19.7156	FAA2-3	Predicted acyl CoA synthetase	2.00661	2.00661	0.09601	1.13134	1.13134	0.07277
orf19.5700	TLO11	Member of a family of telomere-proximal genes of unknown function; may be spliced in vivo	2.00601	2.00601	0.03176	1.54939	1.54939	0.03539
orf19.3994	0	Dolichyl-diphosphooligosaccharide-protein glycotransferase; predicted role in protein N-linked glycosylation, protein O-linked mannosylation; Spider biofilm repressed	2.00557	2.00557	0.00261	1.46343	1.46343	0.00289
orf19.6160	0	Ortholog(s) have role in eisosome assembly and eisosome, membrane raft, mitochondrion, plasma membrane localization	2.00255	2.00255	0.18487	1.44943	1.44943	0.10393
orf19.1433	0	Protein of unknown function; Hap43-repressed; colony morphology-related gene regulation by Ssn6; Spider biofilm induced	2.00218	2.00218	0.01599	1.94766	1.94766	0.00155
orf19.2846	0	Protein of unknown function; Hap43-repressed; induced in core caspofungin response; regulated by yeast-hypha switch; Spider biofilm repressed	2.00133	2.00133	0.0949	2.29894	2.29894	0.01329
orf19.6077	0	Putative protein of unknown function; shows colony morphology-related gene regulation by Ssn6p	1.99928	1.99928	0.03089	1.18048	1.18048	0.21719
orf19.7027	0	Protein of unknown function; Spider biofilm induced	1.99593	1.99593	0.02175	1.78271	1.78271	0.0078
orf19.5007	ACT1	Actin; gene has intron; transcript regulated by growth phase, starvation; at polarized growth site in budding and hyphal cells; required for wild-type Cdc42 localization; unprocessed N terminus; Hap43-induced; Spider biofilm repressed	1.99236	1.99236	0.01825	1.01659	1.01659	0.93187
orf19.1167	0	Ortholog(s) have sulfonate dioxygenase activity and role in sulfur compound catabolic process	1.99078	1.99078	0.13244	1.56682	1.56682	0.01702
orf19.5311	0	Ortholog of C. dubliniensis CD36 : Cd36_43850, C. parapsilosis CDC317 : CPAR2_402060, Pichia stipitis Pignal : PICST_68242, Candida tropicalis MYA-3404 : CTRG_00303 and Candida albicans WO-1 : CAWG_03390	1.98919	1.98919	0.03784	2.15977	2.15977	3.05744e-05
orf19.5076.1	0	Ortholog of C. parapsilosis CDC317 : CPAR2_804320, Candida tenuis NRRL Y-1498 : CANTEDRAFT_114112, Debaryomyces hansenii CBS767 : DEHA2G14938g and Candida orthopsilosis Co 90-125 : CORT_0A04360	1.98815	1.98815	0.00282	1.99438	1.99438	0.0044
orf19.6788	0	Protein with a predicted role in cotranslational protein targeting to membrane; induced during chlamydospore formation in both C. albicans and C. dubliniensis	1.98494	1.98494	0.00138	2.4075	2.4075	0.00032
orf19.2593	BIO2	Putative biotin synthase; induced by high iron; repressed by ciclopirox olamine; upregulated in clinical isolates from HIV+ patients with oral candidiasis; Hap43-repressed; Spider biofilm induced	1.98229	1.98229	0.09526	1.52012	1.52012	0.04756
orf19.2765	PGA62	Adhesin-like cell wall protein; putative GPI-anchor; fluconazole-induced; induced in high iron; induced during cell wall regeneration; Cyr1 or Ras1 repressed; Tbf1 induced	1.97969	1.97969	0.26316	1.49425	1.49425	0.12144
orf19.3150	GRE2	Putative reductase; Nrg1 and Tup1-regulated; benomyl- and hyphal-induced; macrophage/pseudohyphal-repressed; repressed by low iron; possibly involved in osmotic stress response; stationary phase enriched protein; Spider biofilm induced	1.9767	1.9767	0.02503	2.41903	2.41903	0.00135
orf19.3859	0	Putative microsomal beta-keto-reductase; transcript upregulated by treatment with ciclopirox olamine; induced by alpha pheromone in SpiderM medium; regulated by Sef1, Sfu1, and Hap43	1.97609	1.97609	0.10004	1.91675	1.91675	0.05119
orf19.6028	HGC1	Hypha-specific G1 cyclin-related protein involved in regulation of morphogenesis, biofilm formation; Cdc28-Hgc1 maintains Cdc11 S394 phosphorylation during hyphal growth; required for virulence in mice; regulated by Nrg1, Tup1, farnesol	1.96669	1.96669	0.07752	1.66214	1.66214	0.02691
orf19.1435	TEF1	Translation elongation factor 1-alpha; at cell surface; binds human plasminogen; macrophage/pseudohyphal-induced; induced in RHE model of oral candidiasis, in clinical oral candidiasis isolates; possibly essential; Spider biofilm repressed	1.96623	1.96623	0.07446	1.51545	1.51545	0.03166
orf19.7288	0	Protein with predicted oxidoreductase and dehydrogenase domains; Hap43-repressed; Spider biofilm induced	1.96524	1.96524	0.09537	2.40094	2.40094	0.00369
orf19.778	PIL1	Eisosome component; predicted role in endocytosis; echinocandin-binding protein; localizes to cell surface of hyphae, but not yeast-form cells; Hap43, YNB biofilm induced; rat catheter biofilm repressed	1.96519	1.96519	0.144	1.48325	1.48325	0.01244
orf19.5622	GLC3	Putative 1,4-glucan branching enzyme; fluconazole-induced; colony morphology-related gene regulation by Ssn6; stationary phase enriched protein	1.96035	1.96035	0.12016	1.60003	1.60003	0.00768
orf19.362	TLO9	Member of a family of telomere-proximal genes of unknown function; Hap43p-repressed gene	1.95967	1.95967	0.00643	1.26778	1.26778	0.12607
orf19.1857	0	Putative L-azetidine-2-carboxylic acid acetyltransferase; mutants are viable	1.95885	1.95885	0.12076	1.36454	1.36454	0.14431
orf19.6604	#N/A	#N/A	1.9573	1.9573	0.16253	2.436	2.436	0.00196
orf19.2661	TLO34	Non-telomeric member of a family of telomere-proximal genes of unknown function; predicted N-terminus is extended, relative to that of other family members; overlaps orf19.2662	1.95588	1.95588	0.00294	1.25512	1.25512	0.1241
orf19.3508	0	Putative protein of unknown function; stationary phase enriched protein	1.95129	1.95129	0.03974	2.14899	2.14899	0.00176
orf19.4922	0	Ortholog(s) have Rab GTPase binding activity and Golgi apparatus, endoplasmic reticulum localization	1.94672	1.94672	0.03789	1.29698	1.29698	0.05314
orf19.4432	KSP1	Putative serine/threonine protein kinase; mRNA binds She3 and is localized to hyphal tips; mutation confers hypersensitivity to amphotericin B	1.94552	1.94552	0.12668	1.29687	1.29687	0.15491
orf19.6191	TLO8	Member of a family of telomere-proximal genes of unknown function; may be spliced in vivo	1.94531	1.94531	0.03686	1.566	1.566	0.02464
orf19.2356	CRZ2	C2H2 transcription factor; crz1 not crz2 null mutation suppresses fluconazole resistance of homozygous cka2 null; Rim101-repressed at pH 8; required for yeast cell adherence to silicone substrate; Spider biofilm induced	1.94302	1.94302	0.49778	1.1776	1.1776	0.14825
orf19.7043.1	ACB1	Protein similar to a region of acyl-coenzyme-A-binding protein; amphotericin B repressed; regulated by Nrg1, Tup1; Hap43-induced	1.94243	1.94243	0.02465	1.37041	1.37041	0.64672
orf19.3353	0	Protein similar to a mitochondrial complex I intermediate-associated protein; fluconazole-repressed; Spider biofilm induced; rat catheter biofilm repressed	1.94222	1.94222	0.15246	1.63826	1.63826	0.02111
orf19.6219	0	Ortholog of C. dubliniensis CD36 : Cd36_06470, C. parapsilosis CDC317 : CPAR2_208960, Candida tenuis NRRL Y-1498 : CANTEDRAFT_114040 and Pichia stipitis Pignal : PICST_51125	1.9402	1.9402	0.00088	1.40712	1.40712	0.02232
orf19.1743	ACS1	Acetyl-CoA synthetase; induced by human neutrophils; fluconazole-repressed; regulated by Nrg1/Mig1; colony morphology-related gene regulation by Ssn6; only in stationary phase cultures; rat catheter biofilm repressed, Spider biofilm induced	1.93858	1.93858	0.05317	1.19196	1.19196	0.03279
orf19.538	GPI2	Subunit of the GPI-N-acetylglucosaminyl transferase (GPI-GnT) that catalyzes the first step in GPI anchor biosynthesis	1.93738	1.93738	0.00564	1.58305	1.58305	0.00914
orf19.3974	PUT2	Putative delta-1-pyrroline-5-carboxylate dehydrogenase; alkaline upregulated; protein present in exponential and stationary growth phase yeast cultures; flow model biofilm induced; Spider biofilm induced	1.93628	1.93628	0.02811	1.42385	1.42385	0.08412
orf19.382	TEF2	Translation elongation factor 1-alpha; genes encoding ribosomal subunits, translation factors, and tRNA synthetases are downregulated upon phagocytosis by murine macrophage	1.93627	1.93627	0.05649	1.53541	1.53541	0.02474
orf19.5021	PDX1	Pyruvate dehydrogenase complex protein X; essential component of the mitochondrial pyruvate dehydrogenase complex; role in the respiratory pathway; protein present in exponential and stationary growth phase yeast; Spider biofilm repressed	1.93606	1.93606	0.05885	2.19847	2.19847	0.02385
orf19.3438	0	Ortholog(s) have chaperone binding activity, role in ER-associated ubiquitin-dependent protein catabolic process, protein folding in endoplasmic reticulum, response to unfolded protein and endoplasmic reticulum lumen localization	1.93581	1.93581	0.05657	1.40838	1.40838	0.00252
orf19.3378	0	Protein of unknown function; regulated by Tsa1, Tsa1B in minimal media at 37 degrees C	1.93456	1.93456	0.10599	1.25511	1.25511	0.28842
orf19.4132	0	Protein of unknown function; UPF0057 protein family member; localizes to the plasma membrane; Spider biofilm induced	1.92879	1.92879	0.00035	1.78239	1.78239	0.00549
orf19.3983	0	Protein with a predicted transcription factor BTF3 domain; flow model biofilm induced	1.92755	1.92755	0.12165	1.31698	1.31698	0.00308
orf19.2620	0	Ortholog of C. dubliniensis CD36 : Cd36_33120 and Candida albicans WO-1 : CAWG_02046	1.92525	1.92525	0.01704	1.46964	1.46964	0.05181
orf19.359	GTT12	Ortholog(s) have glutathione peroxidase activity, glutathione transferase activity, role in glutathione metabolic process and endoplasmic reticulum, mitochondrial outer membrane, plasma membrane localization	1.92453	1.92453	0.02164	2.2929	2.2929	0.00279
orf19.1964	0	Protein of unknown function; repressed by fluphenazine treatment; induced by benomyl treatment and in an RHE model; regulated by Nrg1, Tup1	1.92118	1.92118	0.17957	1.10008	1.10008	0.30808
orf19.2737	0	Carbohydrate kinase domain-containing protein; Spider biofilm induced	1.92066	1.92066	0.04157	1.47424	1.47424	0.02535
orf19.1925	TLO5	Member of a family of telomere-proximal genes of unknown function; may be spliced in vivo	1.91636	1.91636	0.004	1.24551	1.24551	0.11217
orf19.993	0	Protein of unknown function; rat catheter biofilm repressed	1.9163	1.9163	0.05334	1.68625	1.68625	0.28064
orf19.6435	0	Highly conserved subunit of mitochondrial pyruvate carrier; Hap43-repressed; Spider biofilm repressed	1.91595	1.91595	0.05001	2.13822	2.13822	0.03565
orf19.6630	0	Ortholog(s) have role in ER-associated ubiquitin-dependent protein catabolic process	1.91112	1.91112	0.25116	1.42458	1.42458	0.02805
orf19.1105.2	PGA56	Regulator of sorbose utilization; putative GPI-anchor; hypha and cell wall regeneration induced; colony morphology-related gene regulation by Ssn6; induced by Tbf1, Hap43; Spider biofilm induced	1.91099	1.91099	0.24363	1.4391	1.4391	0.09551
orf19.2425	HGT18	Putative glucose transporter of the major facilitator superfamily; the C. albicans glucose transporter family comprises 20 members; 12 probable membrane-spanning segments; expressed in rich medium with 2% glucose	1.90815	1.90815	0.05884	1.73397	1.73397	0.00933
orf19.5971	0	Ortholog of S. cerevisiae : MTC6, C. glabrata CBS138 : CAGL0I01892g, C. dubliniensis CD36 : Cd36_84990, C. parapsilosis CDC317 : CPAR2_405620 and Candida tenuis NRRL Y-1498 : CANTEDRAFT_99433	1.90787	1.90787	0.00845	1.54028	1.54028	0.00492
orf19.3266	0	Ortholog of C. dubliniensis CD36 : Cd36_25930, C. parapsilosis CDC317 : CPAR2_800910, Candida tenuis NRRL Y-1498 : CANTEDRAFT_132053 and Debaryomyces hansenii CBS767 : DEHA2E17160g	1.90645	1.90645	0.01714	1.48296	1.48296	0.01573
orf19.4309	GRP2	Methylglyoxal reductase; regulation associated with azole resistance; induced in core stress response or by oxidative stress via Cap1, fluphenazine, benomyl, by Hap43 or with long term fluconazole treatment; Spider biofilm induced	1.90353	1.90353	0.17911	1.48332	1.48332	0.00995
orf19.6305	0	Hydroxytrimethyllysine aldolase, the second enzyme in the carnitine biosynthesis pathway; rat catheter biofilm repressed	1.90124	1.90124	0.05741	1.78904	1.78904	0.04051
orf19.3340	SOD2	Mitochondrial Mn-containing superoxide dismutase; protection against oxidative stress; homotetramer active; N-terminal 34 amino acids removed on mitochondrial import; H2O2-induced via Cap1p; Hap43p-, alkaline-downregulated, farnesol-induced	1.89993	1.89993	0.03823	2.51357	2.51357	0.02989
orf19.1350	0	Protein with a thioredoxin domain; predicted role in cell redox homeostasis; rat catheter and Spider biofilm induced	1.89916	1.89916	0.0534	1.68757	1.68757	0.0715
orf19.5141	0	Ortholog of Candida albicans WO-1 : CAWG_05647	1.89842	1.89842	0.07866	1.44695	1.44695	0.10434
orf19.5809	0	Putative arylformamidase, enzyme of the NAD biosynthesis pathway; Gcn4p-regulated	1.89576	1.89576	0.07165	1.42444	1.42444	0.02104
orf19.941	SEC14	Essential protein; functional homolog of S. cerevisiae Sec14p, a Golgi phosphatidylinositol/phosphatidylcholine transfer protein that regulates choline-phosphate cytidyltransferase and thereby affects secretion; biofilm-regulated	1.89289	1.89289	0.12797	1.8605	1.8605	0.11436
orf19.1589.1	0	Has domain(s) with predicted catalytic activity, pyridoxal phosphate binding activity and role in biosynthetic process	1.88994	1.88994	0.04247	1.32902	1.32902	0.05521
orf19.3888	PGI1	Glucose-6-phosphate isomerase; enzyme of glycolysis; antigenic; Efg1-regulated; induced upon adherence to polystyrene; repressed by phagocytosis, human neutrophils; flow model biofilm induced; rat catheter and Spider biofilm repressed	1.88942	1.88942	0.02507	1.27943	1.27943	0.13109
orf19.4749	0	Protein of unknown function; hyphal-induced expression, regulated by Cyr1, Ras1, Efg1; Hap43-induced gene; Spider biofilm induced	1.8892	1.8892	0.01593	2.21521	2.21521	0.03078
orf19.4540	UBC8	Predicted ubiquitin-conjugating enzyme that negatively regulates gluconeogenesis by mediating the glucose-induced ubiquitination of fructose-1,6-bisphosphatase; induced by alpha pheromone in SpiderM medium	1.88627	1.88627	0.19708	1.68119	1.68119	0.0298
orf19.792	0	Ortholog(s) have protein serine/threonine kinase activity, role in activation of bipolar cell growth, protein phosphorylation, regulation of cytokinesis, regulation of mitotic sister chromatid segregation and cytosol, nucleus localization	1.88438	1.88438	0.02769	1.57019	1.57019	0.02827
orf19.4883	0	Protein of unknown function; S. cerevisiae ortholog Cos111 confers resistance to the antifungal drug ciclopirox olamine; constitutive expression independent of MTL or white-opaque status; Spider biofilm induced	1.8842	1.8842	0.00732	2.80063	2.80063	0.00418
orf19.3959	SSD1	Protein with role in resistance to host antimicrobial peptides; virulence role in murine infection; functional homolog of S. cerevisiae Ssd1p, which suppresses various mutant phenotypes; constitutively expressed and not cell-cycle regulated	1.88206	1.88206	0.11914	1.52547	1.52547	0.02434
orf19.4054	CTA24	Putative transcription factor; positive regulator of gene expression; Efg1-repressed; member of a family of telomere-proximal genes; transcript upregulated in RHE model of oral candidiasis	1.88033	1.88033	0.00059	1.53817	1.53817	0.05022
orf19.4828	0	WD repeat domain protein; Hap43-repressed gene; flow model biofilm induced	1.88023	1.88023	0.00229	1.31122	1.31122	0.19687
orf19.5124	RBR3	Cell wall adhesin-like protein; repressed by Rim101; possibly an essential gene, disruptants not obtained by UAU1 method	1.87991	1.87991	0.06866	1.34339	1.34339	0.10616
orf19.3045	0	Predicted aldehyde dehydrogenase domain; virulence-group-correlated expression	1.87983	1.87983	0.0174	1.33826	1.33826	0.16867
orf19.6947	GTT11	Glutathione S-transferase, localized to ER; induced in exponentially growing cells, under oxidative stress; induced by nitric oxide; Spider biofilm induced	1.87833	1.87833	0.03626	2.27181	2.27181	0.00077
orf19.3573	PEX6	Ortholog(s) have ATPase activity, protein heterodimerization activity, role in fatty acid metabolic process, protein import into peroxisome matrix, receptor recycling, replicative cell aging and cytosol, nucleus, peroxisome localization	1.87724	1.87724	0.16038	1.35818	1.35818	0.02228
orf19.5467	TLO7	Member of a family of telomere-proximal genes of unknown function; may be spliced in vivo; rat catheter biofilm repressed	1.875	1.875	0.01154	1.39495	1.39495	0.10728
orf19.5278	0	Protein of unknown function; Spider biofilm induced	1.8722	1.8722	0.07814	1.30546	1.30546	0.06773
orf19.2023	HGT7	Putative MFS glucose transporter; glucose, fluconazole, Snf3 induced, expressed at high glucose; 20 member C. albicans glucose transporter family; 12 TM regions predicted; flow model biofilm induced; Spider biofilm repressed	1.87213	1.87213	0.15563	1.45802	1.45802	0.07808
orf19.2614	RSR1	RAS-related protein; GTP/GDP cycling required for wild-type polar bud site selection, hyphal growth guidance; role in systemic virulence in mouse; geranylgeranylation predicted; suppresses S. cerevisiae cdc24-4 mutant heat sensitivity	1.87155	1.87155	0.28888	1.54107	1.54107	0.08166
orf19.3216	0	Similar to Rab GTPase activators; Hap43p-induced gene	1.86983	1.86983	0.00285	2.54739	2.54739	0.0023
orf19.3358	LSC1	Putative succinate-CoA ligase subunit; induced by high iron; fluconazole-induced; protein present in exponential and stationary growth phase yeast cultures; Spider biofilm repressed	1.86666	1.86666	0.28498	1.6697	1.6697	0.07373
orf19.6951	0	Ortholog(s) have sphinganine-1-phosphate aldolase activity and role in calcium-mediated signaling, cellular response to starvation, sphingolipid metabolic process	1.86423	1.86423	0.02525	1.60789	1.60789	0.01352
orf19.3311	IFD3	Putative aldo/keto reductase; Mig1-regulated	1.86415	1.86415	0.09513	1.24091	1.24091	0.07329
orf19.3110	0	Possible mannosyltransferase; Spider biofilm induced	1.86313	1.86313	0.09204	1.61203	1.61203	0.08127
orf19.4263	0	Has domain(s) with predicted nucleotide binding activity	1.86236	1.86236	0.01039	-1.12594	0.88814	0.90561
orf19.4662	RLM1	Putative transcription factor; required for wild-type resistance to cell wall perturbation, caspofungin treatment; regulates caspofungin induction of PGA13	1.86159	1.86159	0.15478	1.68312	1.68312	0.03815
orf19.2881	MNN4	Regulator of mannosylphosphorylation of N-linked mannans to cell wall proteins; no role in virulence or normal interaction with macrophages; mutant induces inflammatory cytokines in dendritic cells; rat catheter and Spider biofilm induced	1.86125	1.86125	0.01284	2.19302	2.19302	0.01875
orf19.7654	CPR6	Putative peptidyl-prolyl cis-trans isomerase; macrophage/pseudohyphal-repressed; heavy metal (cadmium) stress-induced; heterozygous null mutant displays sensitivity to virgineone; rat catheter biofilm induced	1.85815	1.85815	0.05084	1.22543	1.22543	0.13546
orf19.3518	0	Ortholog(s) have dicarboxylic acid transmembrane transporter activity, role in mitochondrial transport and mitochondrial inner membrane localization	1.85512	1.85512	0.13181	1.7283	1.7283	0.04522
orf19.740	HAP41	Putative Hap4-like transcription factor; Hap43-repressed; not required for response to low iron; induced by Mnl1 under weak acid stress; Spider biofilm induced	1.85364	1.85364	0.00166	1.65084	1.65084	0.11245
orf19.1513	FAB1	Phosphatidylinositol 3-phosphate 5-kinase; required for hyphal growth on solid media, and for wild-type vacuolar morphology and acidification; not required for wild-type virulence in mouse systemic infection or for adherence to HeLa cells	1.85357	1.85357	0.01917	1.49526	1.49526	0.00995
orf19.7104	0	Adhesin-like cell wall protein; similar to mucins and to a Litomosoides microfilarial sheath protein; N-terminal secretion signal; rat catheter and Spider biofilm repressed	1.85347	1.85347	0.00687	1.11651	1.11651	0.20711
orf19.2270	SMF12	Ortholog of S. cerevisiae Smf1; manganese transporter; Gcn4-regulated; Hap43, alkaline induced; caspofungin repressed; mutants are viable	1.85256	1.85256	0.00494	1.84463	1.84463	0.005
orf19.7448	LYS9	Saccharopine dehydrogenase; lysine biosynthesis; soluble protein in hyphae; amphotericin B repressed; Gcn4-regulated; colony morphology-related gene regulation by Ssn6; protein present in exponential and stationary growth phase yeast	1.85111	1.85111	0.02273	1.37778	1.37778	0.09671
orf19.425	0	Has domain(s) with predicted translation release factor activity and role in translational termination	1.85007	1.85007	0.09132	1.44362	1.44362	0.00576
orf19.4044	MUM2	Protein similar to S. cerevisiae Mum2, a protein essential for meiotic DNA replication and sporulation; induced by alpha pheromone in SpiderM medium; transcript regulated by Tup1	1.8452	1.8452	0.14311	1.44168	1.44168	0.00057
orf19.3740	PGA23	Putative GPI-anchored protein of unknown function; Rim101-repressed; Cyr1-regulated; colony morphology-related gene regulation by Ssn6	1.84424	1.84424	0.21863	1.28964	1.28964	0.1236
orf19.6061	0	Ortholog(s) have role in N-acylethanolamine metabolic process, N-acylphosphatidylethanolamine metabolic process and integral to mitochondrial inner membrane localization	1.844	1.844	0.0406	1.76787	1.76787	0.02565
orf19.22.1	0	Pseudogene; added to Assembly 21 based on comparative genome analysis	1.84354	1.84354	0.01298	1.47287	1.47287	0.01868
orf19.3293	0	Putative enoyl reductase involved in very long chain fatty acid elongation; possibly an essential gene, disruptants not obtained by UAU1 method	1.84279	1.84279	0.05791	1.64131	1.64131	0.02587
orf19.3615	0	Protein of unknown function; induced in core caspofungin response; expression upregulated in an ssr1 null mutant; induced by nitric oxide independent of Yhb1p	1.84277	1.84277	0.00117	1.666	1.666	0.02148
orf19.4549	FGR38	Protein lacking an ortholog in S. cerevisiae; member of a family of related proteins; transposon mutation affects filamentous growth; macrophage-induced gene; Hap43p-repressed gene	1.84165	1.84165	0.01118	1.56138	1.56138	0.02294
orf19.5113	ADH2	Alcohol dehydrogenase; soluble in hyphae; expression regulated by white-opaque switching; regulated by Ssn6; indued by Mnl1 in weak acid stress; protein enriched in stationary phase yeast cultures; Spider biofilm induced	1.84163	1.84163	0.0425	1.57479	1.57479	0.02787
orf19.842	ASR3	Adenylyl cyclase and stress responsive protein; induced in cyr1 or ras1 mutant; Spider biofilm induced	1.83837	1.83837	0.01605	1.80442	1.80442	0.01077
orf19.7518	ZCF38	Putative Zn(II)2Cys6 transcription factor	1.83703	1.83703	0.17202	1.43753	1.43753	0.08103
orf19.5255	PXA2	Putative peroxisomal, half-size adrenoleukodystrophy protein (ALD or ALDp) subfamily ABC transporter; Gcn4p-regulated	1.83618	1.83618	0.01883	1.2999	1.2999	0.01704
orf19.348	SKN2	Protein with a potential role in beta-1,6 glucan biosynthesis; similarity to Kre6 and Skn1; possibly essential, disruptants not obtained by UAU1 method; Hap43-induced; flow model biofilm induced; rat catheter biofilm repressed	1.83552	1.83552	0.10389	1.60389	1.60389	0.00846
orf19.7512	0	Has domain(s) with predicted electron carrier activity, heme binding, iron ion binding, oxidoreductase activity, acting on paired donors and with incorporation or reduction of molecular oxygen, more	1.83444	1.83444	0.0973	1.34251	1.34251	0.02697
orf19.6044	MOB2	Mob1/phocein domain protein of RAM signaling network; cell wall integrity; role in cell separation, cortical actin polarization; required for hyphal growth; phosphorylated by Cdc28 on hyphal induction; activates Cbk1; mRNA binds She3	1.83211	1.83211	0.02866	1.53923	1.53923	0.00128
orf19.5102	PLB5	Putative GPI-linked phospholipase B, fungal-specific (no mammalian homolog); null mutation eliminates cell-associated phospholipase A2 activity and attenuates virulence; fluconazole-repressed; flow model biofilm repressed	1.83199	1.83199	0.03399	1.17422	1.17422	0.16747
orf19.956	0	Ortholog(s) have role in fermentation and mitochondrion localization	1.83159	1.83159	0.15612	1.47387	1.47387	0.04592
orf19.2529.1	0	Protein of unknown function; Spider biofilm repressed	1.8304	1.8304	0.19609	1.1995	1.1995	0.1468
orf19.6552	0	Flavin-linked sulfhydryl oxidase; predicted localization to endoplasmic reticulum lumen; involved in disulfide bond formation within the ER; Spider biofilm induced	1.82616	1.82616	0.09886	1.78047	1.78047	0.01908
orf19.3555	BUD14	Putative SH3-domain-containing protein; predicted role in bud-site selection; Spider biofilm induced	1.81786	1.81786	0.00073	1.05292	1.05292	0.30592
orf19.4899	GCA1	Extracellular/plasma membrane-associated glucoamylase; expressed in rat oral infection; regulated by carbohydrates, pH, galactose; promotes biofilm matrix formation; flow model biofilm induced; Bcr1 repressed in RPMI a/a biofilms	1.81782	1.81782	0.23298	-1.04861	0.95364	0.73951
orf19.1075	0	Protein of unknown function; Spider biofilm induced	1.81644	1.81644	0.05299	1.14404	1.14404	0.00133
orf19.5595	SHE3	mRNA-binding protein that localizes specific mRNAs to daughter yeast cells and to hyphal tips; required for normal filamentation and host epithelial cell damage; ortholog of S. cerevisiae She3 but target mRNAs differs	1.81638	1.81638	0.0013	1.14742	1.14742	0.31232
orf19.5620	0	Stationary phase enriched protein; Gcn4-regulated; induced by amino acid starvation (3-AT), benomyl or in azole-resistant strain that overexpresses MDR1; flow model biofilm induced; rat catheter biofilm repressed; overlaps orf19.5621	1.81497	1.81497	0.10178	1.94219	1.94219	0.02528
orf19.4114	FAA2-1	Predicted long chain fatty acid CoA ligase; upregulated upon phagocytosis; induced by nitric oxide independent of Yhb1	1.81491	1.81491	0.00078	1.21838	1.21838	0.31525
orf19.6167	AYR1	Putative oxidoreductase; transcriptionally induced by interaction with macrophage; rat catheter biofilm repressed	1.81251	1.81251	0.00342	1.83887	1.83887	0.00857
orf19.6337	TLO13	Member of a family of telomere-proximal genes of unknown function; may be spliced in vivo; overlaps orf19.6337.1, which is a region annotated as blocked reading frame	1.80894	1.80894	0.00725	1.276	1.276	0.2363
orf19.2838	0	Protein of unknown function; mutation confers hypersensitivity to amphotericin B; flow model biofilm induced	1.80866	1.80866	0.00946	1.39549	1.39549	0.04018
orf19.4393	CIT1	Citrate synthase; induced by phagocytosis; induced in high iron; Hog1-repressed; Efg1-regulated under yeast, not hyphal growth conditions; present in exponential and stationary phase; Spider biofilm repressed; rat catheter biofilm induced	1.80861	1.80861	0.12001	1.39271	1.39271	0.07032
orf19.3829	PHR1	Cell surface glycosidase; may act on cell-wall beta-1,3-glucan prior to beta-1,6-glucan linkage; role in systemic, not vaginal virulence (neutral, not low pH); high pH or filamentation induced; Bcr1-repressed in RPMI a/a biofilm	1.80759	1.80759	0.03054	2.87543	2.87543	0.00035
orf19.1331	HSM3	Ortholog(s) have role in mismatch repair, proteasome regulatory particle assembly and cytosol, nucleus, proteasome regulatory particle, base subcomplex localization	1.80172	1.80172	0.09026	1.69352	1.69352	0.02736
orf19.3441	FRP6	Putative ammonia transport protein; regulated by Nrg1 and Tup1; regulated by Ssn6; induced by human neutrophils	1.79881	1.79881	0.17486	1.74429	1.74429	0.0455
orf19.6930	SOL1	Cell cycle regulator; partial functional homolog of S. cerevisiae Sic1p; protein degradation regulated by SCF(CDC4) pathway; CDK phosphorylation predicted	1.79828	1.79828	0.25407	1.2029	1.2029	0.08555
orf19.7210	0	Protein of unknown function; Spider biofilm induced	1.798	1.798	0.00611	1.71323	1.71323	0.04767
orf19.5635	PGA7	GPI-linked hyphal surface antigen; induced by ciclopirox olamine, ketoconazole, Rim101 at pH 8; Hap43, fluconazole; flow model biofilm induced; Spider biofilm induced; required for RPMI biofilm; Bcr1-induced in a/a biofilm	1.79728	1.79728	0.12929	1.32308	1.32308	0.10123
orf19.193	0	Ortholog of C. dubliniensis CD36 : Cd36_19310, C. parapsilosis CDC317 : CPAR2_209710, Candida tenuis NRRL Y-1498 : CANTEDRAFT_113479 and Debaryomyces hansenii CBS767 : DEHA2C15114g	1.79256	1.79256	0.00241	1.05457	1.05457	0.32497
orf19.1670	BRO1	Class E vacuolar protein sorting factor; role in transport from multivesicular body to vacuole; not involved in Rim101 pathway; macrophage and pseudohyphal-repressed; flow model biofilm induced	1.78927	1.78927	0.0336	1.93285	1.93285	0.02225
orf19.3607	0	Ortholog of C. dubliniensis CD36 : Cd36_22860, C. parapsilosis CDC317 : CPAR2_806540, Candida tenuis NRRL Y-1498 : CANTEDRAFT_108823 and Debaryomyces hansenii CBS767 : DEHA2B13596g	1.78726	1.78726	0.13183	2.12282	2.12282	0.00601
orf19.867	0	Ortholog(s) have superoxide-generating NADPH oxidase activity, role in apoptotic process, regulation of actin cytoskeleton organization and perinuclear endoplasmic reticulum, ribosome localization	1.78539	1.78539	0.09644	1.64562	1.64562	0.00221
orf19.2458	SIP5	Protein of unknown function; flow model, rat catheter and Spider biofilm induced	1.7853	1.7853	0.07142	1.41472	1.41472	0.11693
orf19.5449	0	Predicted integral membrane protein; Spider biofilm induced	1.78345	1.78345	0.03217	1.69286	1.69286	0.00464
orf19.5285	PST3	Putative flavodoxin; YNB biofilm induced; stationary phase enriched protein; rat catheter and Spider biofilm repressed	1.78308	1.78308	0.13488	1.06682	1.06682	0.11901
orf19.7561	DEF1	RNA polymerase II regulator; role in filamentation, epithelial cell escape, dissemination in RHE model; induced by fluconazole, high cell density; Efg1/hyphal regulated; role in adhesion, hyphal growth on solid media; Spider biofilm induced	1.78216	1.78216	0.11876	1.44406	1.44406	0.05123
orf19.4551	CTN1	Carnitine acetyl transferase; required for growth on nonfermentable carbon sources, not for hyphal growth or virulence in mice; induced in macrophage; macrophage/pseudohyphal-repressed after 16 hr; rat catheter, Spider biofilm induced	1.78207	1.78207	0.07721	4.81751	4.81751	0.05425
orf19.7523	MKC1	MAP kinase; role in biofilm formation, contact-induced invasive filamentation, systemic virulence in mouse, cell wall structure/maintenance, caspofungin response; phosphorylated on surface contact, membrane perturbation, or cell wall stress	1.78063	1.78063	0.13925	1.20216	1.20216	0.02646
orf19.1757	0	Putative C2H2 transcription factor; expression upregulated in clinical isolates from HIV+ patients with oral candidiasis; Spider biofilm induced	1.7775	1.7775	0.03469	1.41537	1.41537	0.00593
orf19.3483	0	Putative phosphatidyl glycerol phospholipase C; Plc1-regulated; flow model biofilm induced; Spider biofilm induced	1.77649	1.77649	0.05681	1.48232	1.48232	0.00179
orf19.2686	0	Ortholog(s) have carboxypeptidase activity, role in nitrogen compound metabolic process, proteolysis involved in cellular protein catabolic process and fungal-type vacuole lumen localization	1.77502	1.77502	0.01648	1.71231	1.71231	0.0336
orf19.6308	0	Ortholog of Candida albicans WO-1 : CAWG_01818	1.77365	1.77365	0.00747	1.52723	1.52723	0.00559
orf19.6116	GLK4	Putative glucokinase; decreased expression in hyphae compared to yeast-form cells	1.77304	1.77304	0.16769	1.15062	1.15062	0.18887
orf19.4134	0	Ortholog(s) have palmitoyltransferase activity, role in protein palmitoylation and plasma membrane localization	1.77223	1.77223	0.20322	1.34879	1.34879	0.10896
orf19.2887	0	Ortholog in S. cerevisiae is localizedto the bud, mating projection tip, and associates with ribosomes; Spider biofilm induced	1.76698	1.76698	0.03806	1.38501	1.38501	0.02643
orf19.1027	PDR16	Phosphatidylinositol transfer protein; induction correlates with CDR1, CDR2 overexpression/azole resistance; fluphenazine, 17-beta-estradiol, ethynyl estradiol, NO induced; farnesol-downregulated in biofilm; rat catheter biofilm induced	1.76619	1.76619	0.0131	1.59543	1.59543	0.09135
orf19.5029	MODF	Ortholog(s) have mitochondrion localization	1.76604	1.76604	0.02158	1.61228	1.61228	0.0006
orf19.6434	PEX19	Ortholog(s) have peroxisome membrane targeting sequence binding activity	1.76354	1.76354	0.11366	1.4645	1.4645	0.01157
orf19.5837	0	Ortholog(s) have 4-amino-4-deoxychorismate lyase activity, role in folic acid biosynthetic process and cytoplasm localization	1.7616	1.7616	0.00558	1.42927	1.42927	0.01808
orf19.6112	CTA2	Putative transcription factor; Med2 mediator domain; activates transcription in 1-hybrid assay in S. cerevisiae; repressed by Efg1; member of a family of telomere-proximal genes; Tbf1-induced	1.76017	1.76017	0.01244	1.4255	1.4255	0.02801
orf19.931	0	Ortholog of Candida albicans WO-1 : CAWG_04452	1.75766	1.75766	0.05987	1.46592	1.46592	0.00256
orf19.3215	0	Putative plasma membrane protein; in S. cerevisiae it is localized to the cell bud and mating projection membrane; repressed by alpha pheromone in SpiderM medium	1.75717	1.75717	0.2163	-1.06347	0.94032	0.88856
orf19.6318	0	Ortholog(s) have endoplasmic reticulum, mitochondrion localization	1.75659	1.75659	0.0615	-1.03193	0.96906	0.82603
orf19.7131	0	Butyrobetaine dioxygenase, the fourth enzyme of the carnitine biosynthesis pathway	1.75647	1.75647	0.01065	1.21708	1.21708	0.05684
orf19.2602	OPT1	Oligopeptide transporter; transports 3-to-5-residue peptides; alleles are distinct, one has intron; suppresses S. cerevisiae ptr2-2 mutant defects; induced by BSA or peptides; Stp3p, Hog1p regulated; flow model biofilm induced	1.75514	1.75514	0.30233	-1.00517	0.99486	0.46166
orf19.4283	0	Ortholog(s) have role in translational initiation and cytosol, eukaryotic 43S preinitiation complex, eukaryotic translation initiation factor 3 complex, eIF3e, eukaryotic translation initiation factor 3 complex, eIF3m, nucleus localization	1.75189	1.75189	0.16415	1.64925	1.64925	0.02449
orf19.4600.1	0	Protein of unknown function; flow model biofilm repressed	1.75159	1.75159	0.49024	1.35011	1.35011	0.17633
orf19.4181	SPC2	Signal peptidase complex component; role in ER protein translocation; transcript is induced upon filamentous growth	1.74909	1.74909	0.23752	1.44872	1.44872	0.01129
orf19.6605	0	Ortholog(s) have fungal-type vacuole, mitochondrion localization	1.74837	1.74837	0.13059	1.69366	1.69366	0.02267
orf19.6512	EXO70	Predicted subunit of the exocyst complex, involved in exocytosis; localizes to a crescent on the surface of the hyphal tip	1.74767	1.74767	0.07841	1.37608	1.37608	0.00436
orf19.1183	0	Ortholog(s) have fungal-type vacuole localization	1.74762	1.74762	0.08621	1.83237	1.83237	0.0055
orf19.4262	0	Ortholog(s) have mRNA binding activity and role in cellular protein complex localization, establishment of mitochondrion localization, nuclear-transcribed mRNA catabolic process, deadenylation-dependent decay	1.74702	1.74702	0.1561	1.12349	1.12349	0.27323
orf19.4317	GRE3	Putative D-xylose reductase; antigenic in murine systemic infection; soluble protein in hyphae; induced by farnesol, macrophage interaction and by Mnl1 under weak acid stress; stationary-phase enriched protein; Spider biofilm induced	1.74662	1.74662	0.0246	1.59011	1.59011	0.00831
orf19.1723	0	Ortholog(s) have role in response to purine-containing compound and cytoplasm, nucleus localization	1.74654	1.74654	0.01686	1.78612	1.78612	0.02884
orf19.6414	0	Ortholog of C. dubliniensis CD36 : Cd36_34040, C. parapsilosis CDC317 : CPAR2_205850, Candida tenuis NRRL Y-1498 : CANTEDRAFT_132607 and Debaryomyces hansenii CBS767 : DEHA2A11638g	1.74495	1.74495	0.17982	1.18024	1.18024	0.26494
orf19.2013	KAR2	Similar to Hsp70 family chaperones; role in translocation of proteins into the ER; induced in high iron; protein present in exponential and stationary growth phase yeast cultures; flow model and Spider biofilm repressed	1.74462	1.74462	0.09948	1.09217	1.09217	0.37138
orf19.2584	OPT9	Probable pseudogene similar to fragments of OPT1 oligopeptide transporter gene; decreased expression in hyphae compared to yeast-form cells; transcriptionally induced upon phagocytosis by macrophage	1.74275	1.74275	0.27705	1.13337	1.13337	0.27808
orf19.7261	GDI1	Putative Rab GDP-dissociation inhibitor; GlcNAc-induced protein; Spider biofilm repressed	1.74269	1.74269	0.01851	1.3878	1.3878	0.02386
orf19.2074	0	Ortholog of Candida albicans WO-1 : CAWG_03833	1.74238	1.74238	0.26034	1.01596	1.01596	0.44771
orf19.4573	ZCF26	Zn2-Cys6 transcription factor of unknown function; induced by alpha pheromone in SpiderM medium	1.74163	1.74163	0.05847	1.31936	1.31936	0.02132
orf19.3885	0	Has domain(s) with predicted N-acetyltransferase activity; highly induced during chlamydospore formation in both C. albicans and C. dubliniensis	1.73872	1.73872	0.07676	1.55093	1.55093	0.0633
orf19.2638	0	Protein of unknown function; Spider biofilm induced	1.73867	1.73867	0.20521	2.17806	2.17806
orf19.2841	PGM2	Ortholog of S. cerevisiae Pgm2; induced in planktonic culture; Tye7p-regulated; flow model biofilm induced; rat catheter biofilm repressed	1.73817	1.73817	0.14593	-1.0505	0.95193	0.47766
orf19.1287	0	Protein of unknown function; flow model biofilm induced; Spider biofilm induced	1.73735	1.73735	0.14682	1.86728	1.86728	0.01825
orf19.5758	SAL6	Putative protein phosphatase of the Type 1 family; serine/threonine-specific; similar to S. cerevisiae Ppq1; mutant has virulence defect; Spider biofilm induced	1.73614	1.73614	0.11045	1.48803	1.48803	0.04896
orf19.5565	HPD1	3-hydroxypropionate dehydrogenase; involved in degradation of toxic propionyl-CoA; rat catheter and Spider biofilm induced	1.73525	1.73525	0.14505	1.75698	1.75698	0.01472
orf19.1285	0	Plasma membrane-localized protein of unknown function; Hap43p-repressed gene	1.73467	1.73467	0.08256	-1.0579	0.94527	0.25225
orf19.4618	FBA1	Fructose-bisphosphate aldolase; glycolytic enzyme; antigenic in murine/human infection; regulated by yeast-hypha switch; induced by Efg1, Gcn4, Hog1, fluconazole; phagocytosis-repressed; flow model biofilm induced; Spider biofilm repressed	1.73419	1.73419	0.21949	1.71598	1.71598	0.03006
orf19.5117	OLE1	Fatty acid desaturase, essential protein involved in oleic acid synthesis; required for aerobic hyphal growth and chlamydospore formation; subject to hypoxic regulation; fluconazole-induced; caspofungin repressed; Hap43p-induced	1.73267	1.73267	0.13949	1.37169	1.37169	0.00967
orf19.4523	0	Ortholog(s) have 5-formyltetrahydrofolate cyclo-ligase activity, role in folic acid-containing compound biosynthetic process and mitochondrion localization	1.7323	1.7323	0.07885	1.16408	1.16408	0.2275
orf19.7118	0	Ortholog(s) have adenylate kinase activity, nucleoside triphosphate adenylate kinase activity, role in nucleotide metabolic process and mitochondrial inner membrane localization	1.73146	1.73146	0.01262	1.30484	1.30484	0.00361
orf19.5265	KIP4	S. cerevisiae Smy1 ortholog; Tn mutation affects filamentous growth; filament induced; has Mob2-dependent hyphal regulation; regulated by Nrg1, Tup1; oralpharyngeal candidasis induced; Spider biofilm induced; flow model biofilm repressed	1.73135	1.73135	0.05978	1.29946	1.29946	0.02886
orf19.3737	0	Protein with a Vps9 vacuolar protein sorting protein domain; Hap43-repressed; repressed by ciclopirox olamine; Spider biofilm induced	1.7311	1.7311	0.01768	1.23858	1.23858	0.03871
orf19.2168	0	Putative sterol deacetylase; flow model biofilm induced; rat catheter biofilm repressed	1.73103	1.73103	0.03685	1.5298	1.5298	0.00248
orf19.703	0	Ortholog(s) have 2',3'-cyclic-nucleotide 3'-phosphodiesterase activity, role in cyclic nucleotide metabolic process and clathrin-coated vesicle localization	1.73083	1.73083	0.04664	1.97536	1.97536	0.00212
orf19.4463	0	Ortholog of Candida albicans WO-1 : CAWG_01004	1.72975	1.72975	0.19032	4.80521	4.80521	0.02243
orf19.3794	CSR1	Transcription factor; role in zinc homeostasis and regulation of Spider biofilm matrix; mutation affects filamentous growth; can suppress S. cerevisiae rok1 mutant inviability; Spider biofilm induced; mutants for abnormal Spider biofilms	1.72899	1.72899	0.1505	1.34869	1.34869	0.02902
orf19.5469	0	Protein with a predicted DEAD-like DNA/RNA helicase domain; shows colony morphology-related gene regulation by Ssn6; overlaps orf19.5472; Spider biofilm repressed	1.72587	1.72587	0.04291	-1.18579	0.84332	0.9551
orf19.1356	0	Ortholog(s) have thiosulfate sulfurtransferase activity, role in tRNA wobble position uridine thiolation and mitochondrion localization	1.72555	1.72555	0.00937	1.77445	1.77445	0.01149
orf19.6472	CYP1	Peptidyl-prolyl cis-trans isomerase; cyclosporin A sensitive activity; soluble in hyphae; biofilm induced, macrophage-induced protein; downregulated upon treatment of biofilm with farnesol; present in exponential and stationary phase cells	1.72448	1.72448	0.01546	1.2481	1.2481	0.00194
orf19.692	0	Protein of unknown function; Hap43-repressed gene; rat catheter and Spider biofilm induced	1.72365	1.72365	0.03886	1.39361	1.39361	0.04592
orf19.2124	0	Predicted alcohol dehydrogenase; Spider biofilm induced	1.72295	1.72295	0.17969	1.54232	1.54232	0.05633
orf19.2065	0	Ortholog(s) have role in allantoin catabolic process and cytosol, nucleus localization	1.71524	1.71524	0.02725	1.32439	1.32439	0.06968
orf19.5503	0	Putative protein of unknown function; transcript is upregulated in clinical isolates from HIV+ patients with oral candidiasis; Spider biofilm induced	1.71433	1.71433	0.14281	2.66453	2.66453	0.00602
orf19.7544	TLO1	Member of a family of telomere-proximal genes of unknown function; hypha-induced expression; rat catheter biofilm repressed	1.71353	1.71353	0.00284	1.38184	1.38184	0.08221
orf19.2805	PEX8	Putative peroxisomal biogenesis factor; expression regulated during planktonic growth	1.71205	1.71205	0.11864	1.298	1.298	0.07624
orf19.1392	0	Ortholog(s) have chaperone binding, protein disulfide isomerase activity, unfolded protein binding activity and role in ER-associated ubiquitin-dependent protein catabolic process, protein retention in ER lumen	1.70922	1.70922	0.04729	1.35603	1.35603	0.01304
orf19.6594	PLB3	GPI-anchored cell surface phospholipase B; possibly secreted; fungal-specific (no mammalian homolog); induced by Tbf1; fluconazole-induced; possible essential gene (UAU1 method); Spider and flow model biofilm induced	1.70916	1.70916	0.01166	2.15338	2.15338	0.01926
orf19.4539	0	Protein with a Rho GDP-dissociation inhibitor domain; Hap43-repressed gene; Spider biofilm induced	1.7083	1.7083	0.04857	1.20541	1.20541	0.1671
orf19.5741	ALS1	Cell-surface adhesin; adhesion, virulence, immunoprotective roles; band at hyphal base; Rfg1, Ssk1, Spider biofilm induced; flow model biofilm repressed; CAI-4 strain background effects; promoter bound Bcr1, Tec1, Efg1, Ndt80, and Brg1	1.70813	1.70813	0.19471	6.00604	6.00604	0.02159
orf19.4752	MSN4	Zinc finger transcription factor; similar to S. cerevisiae Msn4, but not a significant stress response regulator in C. albicans; partly complements STRE-activation defect of S. cerevisiae msn2 msn4 double mutant; flow model biofilm induced	1.70395	1.70395	0.10749	1.38998	1.38998	0.04509
orf19.4088	GLO2	Ortholog(s) have hydroxyacylglutathione hydrolase activity, role in cellular carbohydrate metabolic process, methylglyoxal catabolic process to D-lactate and cytosol, mitochondrion, nucleus localization	1.70352	1.70352	0.02023	1.77781	1.77781	0.0112
orf19.3799	0	Ortholog(s) have role in endoplasmic reticulum tubular network maintenance, nuclear pore complex assembly and Golgi apparatus, cortical endoplasmic reticulum, integral to endoplasmic reticulum membrane, mitochondrion localization	1.70242	1.70242	0.12902	1.08825	1.08825	0.17534
orf19.290	KRE5	UDP-glucose:glycoprotein glucosyltransferase; 1,6-beta-D-glucan biosynthesis, hyphal growth, virulence in mouse IV model; partially complements S. cerevisiae kre5 mutant defects; flow biofilm repressed, Bcr1-repressed in RPMI a/a biofilms	1.70177	1.70177	0.09158	1.14644	1.14644	0.08568
orf19.893	PGA17	Putative GPI-anchored protein; exogenously expressed protein substrate for Kex2 processing in vitro; repressed by alpha pheromone in SpiderM medium; macrophage-induced; induced in oralpharyngeal candidiasis; Spider biofilm induced	1.70144	1.70144	0.11925	1.2861	1.2861	0.15181
orf19.347	RSN1	Protein of unknown function; flow model biofilm induced; Spider biofilm induced; induced during the mating process; Hap43-repressed	1.70095	1.70095	0.26001	1.30235	1.30235	0.10103
orf19.4177	HIS5	Putative histidinol-phosphate aminotransferase; Gcn4p-regulated; protein present in exponential and stationary growth phase yeast cultures	1.70063	1.70063	0.08102	1.59201	1.59201	0.02712
orf19.95	0	Ortholog of S. cerevisiae : PRM5, C. dubliniensis CD36 : Cd36_60980, C. parapsilosis CDC317 : CPAR2_603060, Candida tenuis NRRL Y-1498 : CANTEDRAFT_113703 and Debaryomyces hansenii CBS767 : DEHA2F10032g	1.70056	1.70056	0.12565	1.48114	1.48114	0.18354
orf19.3751	0	Putative serine/threonine protein kinase; possibly an essential gene, disruptants not obtained by UAU1 method	1.69919	1.69919	0.25778	-1.0413	0.96033	0.63826
orf19.4157	SPS20	Peroxisomal 2,4-dienoyl-CoA reductase; stationary phase enriched protein; Spider biofilm induced	1.69889	1.69889	0.12383	1.42453	1.42453	0.01266
orf19.6327	HET1	Putative sphingolipid transfer protein; involved in localization of glucosylceramide which is important for virulence; Spider biofilm repressed	1.69642	1.69642	0.01598	1.13136	1.13136	0.2154
orf19.5073	DPM1	Putative dolichol phosphate mannose synthase; filament induced; Tup1-regulated; flow model and rat catheter biofilm repressed	1.69584	1.69584	0.01045	1.35597	1.35597	0.07953
orf19.4754	ZWF1	Glucose-6-phosphate dehydrogenase; antigenic in mice; activity induced by O2 or oxidizing agents H2O2, menadione, macrophage; caspofungin repressed; induced in core stress response; regulated by Gcn2, Gcn4; rat catheter biofilm repressed	1.69216	1.69216	0.25723	1.77182	1.77182	0.03742
orf19.4000	GRF10	Putative homeodomain transcription factor; null mutant is an adenine auxotroph; Spider biofilm induced; promoter bound by Bcr1, Tec1, Efg1, Ndt80 and Brg1	1.69185	1.69185	0.05713	1.32826	1.32826	0.34199
orf19.1477	0	Protein of unknown function; possible ER protein; Hap43p-repressed; Spider biofilm induced	1.69015	1.69015	0.15054	1.45293	1.45293	0.02981
orf19.4930	SPC3	Essential protein; similar to S. cerevisiae Spc3p, a component of the signal peptidase complex required for signal peptidase activity; predicted integral ER membrane protein; complements spc3 and suppresses sec61 S. cerevisiae mutants	1.68993	1.68993	0.18342	1.35049	1.35049	4.13556e-05
orf19.3669	SHA3	Putative ser/thr kinase involved in glucose transport; Tn mutation affects filamentous growth; fluconazole-induced; ketoconazole-repressed; induced in by alpha pheromone in SpiderM; possibly essential; flow model biofilm induced	1.68993	1.68993	0.11434	2.1712	2.1712	0.04217
orf19.7672	0	Ortholog(s) have role in ER-associated ubiquitin-dependent protein catabolic process, endoplasmic reticulum unfolded protein response	1.68989	1.68989	0.02658	1.8819	1.8819	0.00375
orf19.7362	SKN1	Protein with a role in beta-1,6-glucan synthesis; probable N-glycosylated type II membrane protein; transcript and mRNA length change induced by yeast-hypha transition; induced by Rim101, caspofungin; rat catheter and Spider biofilm induced	1.68803	1.68803	0.08863	1.60801	1.60801	0.03719
orf19.4933	FAD3	Omega-3 fatty acid desaturase; production of alpha-linolenic acid, a major component of membranes; caspofungin induced; Plc1-regulated; colony morphology-related gene regulation by Ssn6; Spider biofilm induced, flow model biofilm repressed	1.68801	1.68801	0.21526	-1.23308	0.81098	0.41076
orf19.3501	0	S. cerevisiae ortholog Pxl1 localizes to sites of polarized growth and is required for selection and/or maintenance of polarized growth sites; Hog1p-repressed	1.68608	1.68608	0.21546	2.08598	2.08598	0.00754
orf19.2199	PHO86	Putative endoplasmic reticulum protein; possibly adherence-induced	1.68302	1.68302	0.03627	1.23501	1.23501	0.09771
orf19.2047	0	Putative protein of unknown function; Hap43p-repressed gene; mutation confers hypersensitivity to toxic ergosterol analog, and to amphotericin B	1.68228	1.68228	0.00085	1.35409	1.35409	0.06983
orf19.7434	GLG2	Putative self-glucosylating initiator of glycogen synthesis; expression regulated upon white-opaque switch; hypha-induced; Spider biofilm induced	1.68223	1.68223	0.01875	1.50438	1.50438	0.00239
orf19.2341	HNT1	Protein with similarity to protein kinase C inhibitor-I; protein level decreases in stationary phase cultures	1.67926	1.67926	0.03989	1.58796	1.58796	0.01067
orf19.4090	0	Predicted membrane transporter, member of the fucose:proton symporter (FHS) family, major facilitator superfamily (MFS)	1.67797	1.67797	0.04598	1.06933	1.06933	0.4626
orf19.5799	0	Ortholog(s) have cytoplasm localization	1.67773	1.67773	0.01544	1.54639	1.54639	0.01665
orf19.744	GDB1	Putative glycogen debranching enzyme; expression is regulated upon white-opaque switch; regulated by Nrg1, Tup1; rat catheter biofilm repressed	1.67469	1.67469	0.02119	1.18145	1.18145	0.08133
orf19.7283	0	Protein of unknown function; rat catheter and Spider biofilm induced	1.67466	1.67466	0.03398	2.38234	2.38234	0.01658
orf19.4698	PTC8	Predicted type 2C protein phosphatase, ser/thr-specific; required for hyphal growth; transcript induced by stress; flow model biofilm induced; Spider biofilm induced	1.67465	1.67465	0.29112	1.41849	1.41849	0.01201
orf19.5334	0	Ortholog od S. cerevisiae Tis11, a mRNA-binding protein; transcription regulated by yeast-hyphal switch; flow model biofilm induced; Spider biofilm repressed	1.67293	1.67293	0.07658	-1.02316	0.97736	0.76418
orf19.323	0	Putative haloacid dehalogenase; localized to plasma membrane	1.67289	1.67289	0.03628	1.12162	1.12162	0.24413
orf19.5156	0	Protein similar to S. cerevisiae Phs1p, which is required for growth; has six putative membrane-spanning regions	1.67233	1.67233	0.04216	1.52121	1.52121	0.0069
orf19.4608	PDC12	Putative pyruvate decarboxylase; fungal-specific (no human or murine homolog)	1.67132	1.67132	0.12915	1.71069	1.71069	0.04044
orf19.2531	CSP37	Hyphal cell wall protein; role in progression of mouse systemic infection; predicted P-loop, divalent cation binding, N-glycosylation sites; expressed in yeast and hyphae; hyphal downregulated; stationary-phase enriched; GlcNAc-induced	1.67033	1.67033	0.00268	1.68611	1.68611	0.0135
orf19.3360	0	Protein of unknown function; flow model biofilm induced; Spider biofilm induced	1.66996	1.66996	0.19594	1.59984	1.59984	0.19129
orf19.4901	0	Predicted methyltransferase; Spider biofilm induced	1.66878	1.66878	0.0081	1.65271	1.65271	0.04739
orf19.1543	OPI1	Leucine zipper transcription factor; repressor of INO1 involved in inositol biosynthesis; functional homolog of S. cerevisiae Opi1; has putative Opi1-Sin3 interaction domain; interacts with ScSin3, but not CaSin3	1.66874	1.66874	0.00141	1.56432	1.56432	0.00108
orf19.3612	PST2	Putative NADH:quinone oxidoreductase; similar to 1,4-benzoquinone reductase; immunogenic in mice; induced by benomyl, oxidative stress via Cap1; fungal-specific; farnesol-repressed; Spider biofilm induced	1.66754	1.66754	0.04587	1.62239	1.62239	0.0105
orf19.4449	CCS1	Copper chaperone involved in activation and protection of superoxide dismutase Sod1p	1.66672	1.66672	0.0285	1.58464	1.58464	0.00622
orf19.5788	EFT2	Elongation Factor 2 (eEF2); GTPase; essential; highly expressed; target of sordarin antifungals; antigenic in human/mouse; lacks site for regulatory phosphorylation by eEF2 kinase; GCN-regulated; higher protein amount in stationary phase	1.66529	1.66529	0.00798	1.08626	1.08626	0.21901
orf19.2590	0	Putative dethiobiotin synthetase; transcript upregulated in clinical isolates from HIV+ patients with oral candidiasis; Hap43-repressed; GlcNAc-induced protein; Spider biofilm induced	1.66464	1.66464	0.0731	1.03298	1.03298	0.71491
orf19.4553	0	Ortholog of C. dubliniensis CD36 : Cd36_64990, C. parapsilosis CDC317 : CPAR2_600170, Candida tenuis NRRL Y-1498 : CANTEDRAFT_121753 and Debaryomyces hansenii CBS767 : DEHA2E19712g	1.66415	1.66415	0.11057	1.19872	1.19872	0.21001
orf19.4767	ZCF28	Zn(II)2Cys6 transcription factor; required for yeast cell adherence to silicone substrate; Spider biofilm induced	1.66325	1.66325	0.01177	1.12326	1.12326	0.23351
orf19.7545	0	Protein similarity to mutator-like element (MULE) transposase	1.66201	1.66201	0.06157	1.44228	1.44228	0.0189
orf19.1321	HWP1	Hyphal cell wall protein; host transglutaminase substrate; opaque-, a-specific, alpha-factor induced; at MTLa side of conjugation tube; virulence complicated by URA3 effects; Bcr1-repressed in RPMI a/a biofilms; Spider biofilm induced	1.66147	1.66147	0.12123	1.42329	1.42329	0.06055
orf19.6500	ECM42	Ornithine acetyltransferase; Gcn2, Gcn4-regulated; clade-specific gene expression; possibly essential gene, disruptants not obtained by UAU1 method; Spider biofilm induced	1.65999	1.65999	0.01309	1.23651	1.23651	0.02093
orf19.812	0	Ortholog of C. dubliniensis CD36 : Cd36_18730, C. parapsilosis CDC317 : CPAR2_212510, Candida tenuis NRRL Y-1498 : CANTEDRAFT_135843 and Debaryomyces hansenii CBS767 : DEHA2D06732g	1.65855	1.65855	0.23532	1.27302	1.27302	0.13364
orf19.4788	ARG5,6	Arginine biosynthetic enzyme; processed in S. cerevisiae into 2 polypeptides with acetylglutamate kinase (Arg6) activity and acetylglutamate-phosphate reductase (Arg5) activity; Gcn4 regulated; alkaline repressed; Spider biofilm induced	1.65674	1.65674	0.07835	1.7922	1.7922	0.00785
orf19.3151	0	Has domain(s) with predicted catalytic activity, coenzyme binding activity and role in cellular metabolic process	1.65629	1.65629	0.22334	1.53123	1.53123	0.09943
orf19.4772	SSU81	Predicted adaptor protein involved in activation of MAP kinase-dependent signaling pathways; links response to oxidative stress to morphogenesis and cell wall biosynthesis; caspofungin repressed	1.65527	1.65527	0.23872	1.53681	1.53681	0.00344
orf19.6770	0	protein with ENTH Epsin domain, N-terminal; Spider biofilm repressed	1.65477	1.65477	0.04593	-1.02957	0.97128	0.52034
orf19.4241	0	Protein of unknown function; transcript detected on high-resolution tiling arrays	1.65454	1.65454	0.5664	1.30079	1.30079	0.06736
orf19.3793	0	Protein of unknown function; mRNA binds She3; regulated by Nrg1; upregulated in a cyr1 or ras1 mutant	1.65383	1.65383	0.08303	1.43053	1.43053	0.10925
orf19.6882	OSM1	Putative flavoprotein subunit of fumarate reductase; soluble protein in hyphae; caspofungin repressed; stationary phase enriched protein; flow model biofilm induced; Spider biofilm repressed	1.65334	1.65334	0.06556	1.15487	1.15487	0.17682
orf19.5924	ZCF31	Zn(II)2Cys6 transcription factor of unknown function; mutant is sensitive to copper and SDS, and resistant to Calcofluor White; required for yeast cell adherence to silicone substrate	1.65091	1.65091	0.15376	1.46431	1.46431	0.00099
orf19.5867	WSC1	Putative cell wall component; transcript upregulated in cyr1 mutant (yeast or hyphae); Spider and flow model biofilm induced	1.64989	1.64989	0.08407	1.39405	1.39405	0.13445
orf19.4655	OPT6	Putative oligopeptide transporter; fungal-specific (no human or murine homolog); expression of OPT6, OPT7, or OPT8 does not suppress defect of mutant lacking Opt1p, Opt2p, and Opt3p; alleles are nonidentical	1.64901	1.64901	0.06332	1.5926	1.5926	0.03119
orf19.6578	0	Predicted membrane transporter; vesicular neurotransmitter (VNT) family, major facilitator superfamily (MFS); repressed in core caspofungin response; induced in oralpharyngeal candidasis; Spider biofilm induced	1.64852	1.64852	0.1918	2.28038	2.28038	0.00961
orf19.2767	PGA59	Adhesin-like cell wall protein; putative GPI-anchor; colony morphology-related gene regulation by Ssn6; Hap43-induced; Spider biofilm repressed	1.64814	1.64814	0.30417	1.25186	1.25186	0.2485
orf19.1152	0	Protein of unknown function; induced in core stress response; Gcn2 and Gcn4 regulated; flow model biofilm induced; Spider biofilm induced	1.64812	1.64812	0.12896	2.12946	2.12946	0.01931
orf19.6173	STD1	Putative transcription factor; involved in control of glucose-regulated gene expression; repressed by Rgt1; Spider biofilm induced	1.64745	1.64745	0.03783	1.17169	1.17169	0.0699
orf19.7042	0	Protein of unknown function; induced by benomyl or in an azole-resistant strain overexpressing MDR1; induced by nitric oxide; Spider biofilm induced	1.64699	1.64699	0.19628	-1.23187	0.81177	0.33478
orf19.537	0	Ortholog of C. dubliniensis CD36 : Cd36_29810, C. parapsilosis CDC317 : CPAR2_206030, Candida tenuis NRRL Y-1498 : CANTEDRAFT_102086 and Debaryomyces hansenii CBS767 : DEHA2F14014g	1.64619	1.64619	0.014	1.52099	1.52099	0.06651
orf19.7029	0	Putative guanine deaminase; mutation confers hypersensitivity to toxic ergosterol analog; Spider biofilm induced	1.64524	1.64524	0.04051	1.36821	1.36821	0.15149
orf19.7539.1	0	Putative adhesin-like protein; transcription detected in high-resolution tiling array experiments	1.64504	1.64504	0.13184	1.06062	1.06062	0.25778
orf19.5605	0	Ortholog(s) have protein binding, bridging, ubiquitin protein ligase binding activity and role in positive regulation of ubiquitin-dependent endocytosis, regulation of intracellular transport	1.645	1.645	0.12392	1.32649	1.32649	0.06336
orf19.7619	0	Protein with a mitochondrial distribution and morphology domain; possibly an essential gene, disruptants not obtained by UAU1 method; rat catheter and Spider biofilm induced	1.6422	1.6422	0.00247	1.66537	1.66537	0.00708
orf19.2574	0	Ortholog(s) have Golgi apparatus localization	1.6419	1.6419	0.05878	1.16647	1.16647	0.14528
orf19.4524	ZCF24	Predicted Zn(II)2Cys6 transcription factor; caspofungin induced; Hap43-repressed	1.64126	1.64126	0.06897	1.00871	1.00871	0.58654
orf19.2204	0	Predicted membrane protein of unknown function; Spider biofilm induced	1.6399	1.6399	0.17722	1.88619	1.88619	0.00499
orf19.723	BCR1	Transcription factor; regulates a/alpha biofilm formation, matrix, cell-surface-associated genes; confers adherence, impermeability, impenetrability, fluconazole resistance; Tup1/Tec1/Mnl1-regulated; mRNA binds She3; Spider biofilm induced	1.63857	1.63857	0.02936	1.39947	1.39947	0.09234
orf19.5862	AFP99	Protein related to arginases; downregulated upon adherence to polystyrene; regulated by Gcn2p and Gcn4p	1.63696	1.63696	0.1316	1.95635	1.95635	0.02487
orf19.1535	0	Protein of unknown function; Hap43-induced gene	1.6361	1.6361	0.10681	1.25403	1.25403	0.03237
orf19.2107.1	STF2	Protein involved in ATP biosynthesis; repressed in hyphae; repressed by Efg1, Hap43; transcript upregulated in clinical isolates from HIV+ patients with oral candidiasis; rat catheter, flow model and Spider biofilm induced	1.63544	1.63544	0.14344	1.41605	1.41605	0.09267
orf19.944	IFG3	Putative D-amino acid oxidase; Spider biofilm induced	1.63397	1.63397	0.07535	1.55131	1.55131	0.01923
orf19.3327	TRM2	Putative tRNA methyltransferase; repressed by prostaglandins; Spider biofilm induced	1.63355	1.63355	0.33654	1.25342	1.25342	0.0131
orf19.787.1	0	Protein of unknown function; ORF added to Assembly 21 based on comparative genome analysis; protein detected by mass spec in stationary phase cultures	1.6332	1.6332	0.25248	1.3435	1.3435	0.12449
orf19.4943	PSA2	Mannose-1-phosphate guanyltransferase; Hap43, macrophage-repressed; stationary phase enriched protein; Spider biofilm induced; rat catheter biofilm repressed	1.63025	1.63025	0.00833	2.29284	2.29284	0.00088
orf19.793	CAK1	Monomeric CDK-activating kinase; functional homolog of S. cerevisiae Cak1p; phosphorylates cyclin-free human CDK2; lacks glycine loop motif; conserved lysine (K36) not required for activity; possibly essential gene (by UAU1 method)	1.62998	1.62998	0.20623	1.265	1.265	0.04006
orf19.5340	0	Putative Rab GTPase activator; role in ER to Golgi vesicle-mediated transport; Spider biofilm induced	1.62963	1.62963	0.12406	1.23666	1.23666	0.03481
orf19.3030	0	Ortholog(s) have phosphatidylinositol binding activity	1.62945	1.62945	0.00308	1.28293	1.28293	0.07178
orf19.4953	0	Putative ATPase; predicted role in ER-associated protein catabolism; induced during chlamydospore formation in both C. albicans and C. dubliniensis; rat catheter biofilm repressed	1.62944	1.62944	0.01215	1.69879	1.69879	0.00699
orf19.6209	0	Predicted membrane transporter; monocarboxylate porter (MCP) family, major facilitator superfamily (MFS); possibly essential, disruptants not obtained by UAU1 method; rat catheter and Spider biofilm induced	1.62923	1.62923	0.0717	1.58682	1.58682	0.08948
orf19.4651	PGA53	GPI-anchored cell surface protein of unknown function; greater mRNA abundance observed in a cyr1 homozygous null mutant than in wild type	1.62883	1.62883	0.20169	1.44729	1.44729	0.0112
orf19.3592	JEM1	Functional homolog of S. cerevisiae Jem1p, which acts with Scj1p and Kar2p (BiP) in protein folding and ER-associated degradation of misfolded proteins, and also has a role in karyogamy; has J domain and 4 tetratricopeptide repeats	1.6273	1.6273	0.00625	1.04607	1.04607	0.94927
orf19.854	UGA11	Putative gamma-aminobutyrate (GABA) transaminase; macrophage-induced; overlaps orf19.854.1, which is a region annotated as a blocked reading frame; Spider biofilm induced	1.62553	1.62553	0.12764	1.10232	1.10232	0.09889
orf19.4630	CPA1	Putative carbamoyl-phosphate synthase subunit; alkaline repressed; rat catheter, Spider and flow model biofilm induced	1.62508	1.62508	0.06843	1.60758	1.60758	0.00303
orf19.6830	0	Putative enoyl-CoA hydratase; Spider biofilm induced	1.62267	1.62267	0.01037	1.72417	1.72417	0.0071
orf19.339	NDE1	Putative NADH dehydrogenase; may act alternatively to complex I in respiration; caspofungin repressed; rat catheter biofilm induced; Spider biofilm repressed	1.62258	1.62258	0.17721	1.14741	1.14741	0.04477
orf19.5921	0	Ortholog(s) have glyoxysome localization	1.62102	1.62102	0.16926	1.64451	1.64451	0.00805
orf19.6322	ARD	D-arabitol dehydrogenase, NAD-dependent (ArDH); enzyme of D-arabitol and D-arabinose catabolism; D-arabitol is a marker for active infection in humans; rat catheter and Spider biofilm induced	1.61814	1.61814	0.00967	1.68933	1.68933	0.032
orf19.5772	0	Ortholog(s) have role in histone exchange and Swr1 complex, cytosol localization	1.61737	1.61737	0.34421	1.34058	1.34058	0.02326
orf19.4349	0	Protein of unknown function; transcript repressed by elevated CO2; Spider biofilm induced	1.61683	1.61683	0.13093	1.20787	1.20787	0.05044
orf19.6638	PTC4	Type PP2C serine/threonine phosphatase; localized to mitochondria; mutation causes sensitivity to sodium, potassium and azole drugs; decreased expression in hyphae compared to yeast-form cells	1.6166	1.6166	0.04219	1.13548	1.13548	0.18286
orf19.7085	0	Protein of unknown function; induced in core stress response; induced by cadmium stress via Hog1; oxidative stress-induced via Cap1; induced by Mnl1 under weak acid stress; macrophage-repressed; rat catheter and Spider biofilm induced	1.61534	1.61534	0.02513	3.01357	3.01357	0.02029
orf19.5019	0	Ortholog of C. dubliniensis CD36 : Cd36_12800, C. parapsilosis CDC317 : CPAR2_203460, Candida tenuis NRRL Y-1498 : CANTEDRAFT_94106 and Debaryomyces hansenii CBS767 : DEHA2C13948g	1.61512	1.61512	0.10033	1.24688	1.24688	0.08115
orf19.6460	PEX1	Ortholog(s) have ATPase activity, protein heterodimerization activity, role in fatty acid metabolic process, protein import into peroxisome matrix, receptor recycling and cytosol, peroxisomal membrane localization	1.6148	1.6148	0.10302	1.06849	1.06849	0.58914
orf19.55	0	Ortholog(s) have role in cellular zinc ion homeostasis and endoplasmic reticulum localization	1.61218	1.61218	0.03767	1.69568	1.69568	0.00847
orf19.542	HXK2	Hexokinase II; antigenic in humans; repressed by human neutrophils; Efg1-regulated; fluconazole-induced; gene regulation by Ssn6; present in exponential and stationary growth phase; flow model biofilm induced; Spider biofilm repressed	1.61211	1.61211	0.02296	1.03964	1.03964	0.43
orf19.6445	ECI1	Protein similar to S. cerevisiae Eci1p, which is involved in fatty acid oxidation; transposon mutation affects filamentous growth; expression is regulated upon white-opaque switching	1.61137	1.61137	0.06821	1.59795	1.59795	0.05339
orf19.6282	0	Has domain(s) with predicted nucleic acid binding, nucleotide binding activity	1.61122	1.61122	0.11267	1.13443	1.13443	0.26974
orf19.2591	0	Ortholog(s) have adenosylmethionine-8-amino-7-oxononanoate transaminase activity and role in biotin biosynthetic process	1.61047	1.61047	0.0209	1.07376	1.07376	0.20226
orf19.7078	0	Ortholog(s) have role in meiosis and cytoplasm localization	1.61018	1.61018	0.02516	1.51494	1.51494	0.04757
orf19.2583.1	0	Pseudogene; formerly an ORF Predicted by Annotation Working Group	1.60965	1.60965	0.30025	1.00029	1.00029	0.52155
orf19.6690	0	Protein of unknown function; Hap43-repressed gene	1.60749	1.60749	0.0316	1.05568	1.05568	0.39648
orf19.1083	0	Putative protein of unknown function; macrophage-induced gene	1.60713	1.60713	0.06864	1.46223	1.46223	0.01699
orf19.3879	0	Predicted protein of unknown funtion; overlaps orf19.3879.1, which is a region annotated as blocked reading frame	1.6067	1.6067	0.01385	1.47323	1.47323	0.05846
orf19.7422	0	Ortholog(s) have RNA binding activity and nucleus localization	1.60586	1.60586	0.01654	1.57755	1.57755	0.05737
orf19.1390	PMI1	Phosphomannose isomerase; cell wall biosynthesis enzyme; drug target; functional homolog of S. cerevisiae, E. coli phosphomannose isomerase; Gcn4-regulated; induced on adherence to polystyrene, phagocytosis; 3-AT, Spider biofilm repressed	1.60567	1.60567	0.03919	1.43993	1.43993	0.01455
orf19.2509.1	0	Ortholog of C. dubliniensis CD36 : Cd36_29340, Spathaspora passalidarum NRRL Y-27907 : spas_CGOB_00040 and Candida albicans WO-1 : CAWG_00248	1.60544	1.60544	0.06476	1.25707	1.25707	0.46728
orf19.6792	RRD1	Putative peptidyl-prolyl cis/trans-isomerase; caspofungin induced	1.60317	1.60317	0.06412	1.28379	1.28379	0.01172
orf19.4166	ZCF21	Predicted Zn(II)2Cys6 transcription factor; mutants display increased colonization of mouse kidneys; Spider biofilm induced	1.60269	1.60269	0.21013	1.24287	1.24287	0.13948
orf19.7251	WSC4	Putative cell wall integrity and stress response subunit 4 precursor; transcription is specific to white cell type	1.60246	1.60246	0.04508	1.18583	1.18583	0.05764
orf19.5169	0	Ortholog(s) have cytosol, nucleus localization	1.60167	1.60167	0.04905	1.37312	1.37312	0.05503
orf19.4951	0	Protein of unknown function; Spider biofilm induced	1.60106	1.60106	0.00555	1.14052	1.14052	0.69281
orf19.4862	0	Putative integral membrane protein; S. cerevisiae ortholog Tvp23 localizes to late Golgi vesicles; rat catheter biofilm induced	1.60042	1.60042	0.01783	1.37729	1.37729	0.01431
orf19.5845	RNR3	Putative ribonucleotide reductase large subunit; transcript induced in low iron; rat catheter and Spider biofilm induced	1.59977	1.59977	0.15044	1.18447	1.18447	0.02331
orf19.3278	GSY1	UDP glucose/starch glucosyltransferase; transcript repressed by yeast-hyphal switch, Efg1-regulated; strong oxidative stress induced; colony morphology-related regulation by Ssn6; stationary phase enriched; flow model biofilm induced	1.59835	1.59835	0.09323	-1.0435	0.95832	0.84853
orf19.2514	0	Predicted methyltransferase; rat catheter biofilm induced	1.59742	1.59742	0.02872	1.25638	1.25638	0.05678
orf19.6336	PGA25	Putative GPI-anchored adhesin-like protein; fluconazole-downregulated; induced in oralpharyngeal candidasis; Spider biofilm induced	1.59653	1.59653	0.07856	1.01575	1.01575	0.53278
orf19.6658	0	Stationary phase enriched protein; predicted ORF from Assembly 19; removed from Assembly 20; subsequently reinstated in Assembly 21 based on comparative genome analysis	1.59407	1.59407	0.24581	1.46719	1.46719	0.06978
orf19.1985	0	Has aminoglycoside phosphotransferase and protein kinase domains; rat catheter and flow model biofilm induced	1.5931	1.5931	0.10949	1.34131	1.34131	0.0296
orf19.3330	CRL1	Predicted GTPase of RHO family; CAAX motif geranylgeranylated; expression in S. cerevisiae causes dominant-negative inhibition of pheromone response	1.59289	1.59289	0.02976	1.26901	1.26901	0.04321
orf19.7479	NTH1	Neutral trehalase; hyphal induction in mutant delayed but not reduced overall; not required for virulence in mice; possible regulatory cAMP-dependent phosphorylation at S10,S213; Hap43-repressed gene; Spider biofilm induced	1.59255	1.59255	0.22043	1.00618	1.00618	0.54375
orf19.6522	0	Putative allantoate permease; Gcn4-regulated; Spider biofilm induced	1.59204	1.59204	0.00557	1.389	1.389	0.06133
orf19.7106	VPS70	Ortholog(s) have role in protein targeting to vacuole and endoplasmic reticulum localization	1.59157	1.59157	0.02433	1.46369	1.46369	0.09408
orf19.5399	IFF11	Secreted protein required for normal cell wall structure and for virulence; member of the IFF family; Hap43p-repressed gene	1.59132	1.59132	0.03064	-5.24254	0.19075	0.04169
orf19.932	0	Putative aminophospholipid translocase (flippase); merged with orf19.2226 in Assembly 21; possibly an essential gene, disruptants not obtained by UAU1 method	1.59121	1.59121	0.00664	-1.02722	0.97351	0.7552
orf19.255	ZCF1	Zn(II)2Cys6 transcription factor; transcript regulated during hypha formation; 5'-UTR intron; mutants show decreased colonization of mouse kidneys; flow model biofilm induced; Spider biofilm induced	1.59111	1.59111	0.0689	1.11546	1.11546	0.22777
orf19.2966	0	Predicted dienelactone hydrolase domain; clade-associated gene expression; farnesol-downregulated; rat catheter biofilm repressed	1.59099	1.59099	0.04117	1.22014	1.22014	0.17226
orf19.3813	0	Ortholog of C. dubliniensis CD36 : Cd36_44340, C. parapsilosis CDC317 : CPAR2_302240, Candida tenuis NRRL Y-1498 : CANTEDRAFT_105331 and Debaryomyces hansenii CBS767 : DEHA2E03454g	1.59037	1.59037	0.02445	1.46413	1.46413	0.04746
orf19.6817	FCR1	Transcription factor; repressor of fluconazole/ketoconazole/brefeldin A resistance; Tn mutation enhances filamentation; partially rescues S. cerevisiae pdr1 pdr3 fluconazole sensitivity; rat catheter biofilm induced/Spider biofilm repressed	1.5888	1.5888	0.02262	-1.28039	0.78101	0.08577
orf19.7466	ACC1	Putative acetyl-coenzyme-A carboxylases; regulated by Efg1; amphotericin B repressed; caspofungin repressed; 5'-UTR intron; gene used for strain identification by multilocus sequence typing; Hap43-induced; flow model biofilm repressed	1.58867	1.58867	0.04003	1.24091	1.24091	0.36069
orf19.6007	0	Predicted fatty acid acyl transferase-related protein domain; repressed by prostaglandins	1.58826	1.58826	0.09555	1.77886	1.77886	0.031
orf19.4866	CPP1	VH1 family MAPK phosphatase; regulates Cst20-Hst7-Cek1-Cph1 filamentation pathway; represses yeast-hyphal switch; required for virulence in mice; yeast-enriched; induced by alpha pheromone in SpiderM medium; Spider biofilm induced	1.58809	1.58809	0.00287	1.10227	1.10227	0.07241
orf19.6186	0	Predicted protein of unknown function; overlaps orf19.6185	1.58798	1.58798	0.06693	-1.1292	0.88558	0.70075
orf19.3010.1	ECM33	GPI-anchored cell wall protein; mutants show cell-wall defects and reduced adhesion, host cell damage, and endocytosis; mutant infection is immunoprotective in murine model; fluconazole-induced; caspofungin repressed	1.58728	1.58728	0.25823	-1.07188	0.93294	0.63582
orf19.6709	0	Predicted alpha/beta hydrolase; Spider biofilm induced	1.58718	1.58718	0.08841	1.81097	1.81097	0.02234
orf19.5958	CDR2	Multidrug transporter, ATP-binding cassette (ABC) superfamily; transports phospholipids, in-to-out direction; overexpressed in azole-resistant isolates; repressed in young biofilms	1.58663	1.58663	0.15583	1.29228	1.29228	0.10353
orf19.6091	RIM8	Beta-arrestin-like protein; involved in pH response; required for pathogenesis, activation of Rim101 and alkaline pH-induced hyphal growth; colony morphology-related gene regulation by Ssn6p negative feedback regulation target	1.58565	1.58565	0.14937	-1.15571	0.86527	0.6099
orf19.6548	ISU1	Protein with similarity to NifU; possible role in iron-sulfur cluster biogenesis; induced in low iron; rat catheter biofilm induced; rat catheter and Spider biofilm induced	1.58455	1.58455	0.04917	1.49118	1.49118	0.05947
orf19.1375	LEU42	Putative alpha-isopropylmalate synthase; fungal-specific; induced by human blood or polymorphonuclear cells; regulated by Gcn2 and Gcn4; stationary phase enriched protein; Spider biofilm induced	1.58428	1.58428	0.19166	1.14732	1.14732	0.18579
orf19.1797	0	D-arabinose 5-phosphate isomerase; has GutQ domain which is associated with phosphosugar binding; other biofilm induced; rat catheter and Spider biofilm induced; F-12/CO2 early biofilm induced	1.58376	1.58376	0.07975	1.42062	1.42062	0.0329
orf19.35	0	Predicted kinase; rat catheter, flow model, Spider biofilm induced	1.58289	1.58289	0.21982	1.98689	1.98689	0.06826
orf19.6084	0	Protein of unknown function; flow model biofilm induced; Spider biofilm induced	1.58081	1.58081	0.15573	1.44313	1.44313	0.0058
orf19.1387	0	Ortholog(s) have 4 iron, 4 sulfur cluster binding activity, role in iron-sulfur cluster assembly, tRNA wobble uridine modification and cytoplasm localization	1.58031	1.58031	0.02716	1.82745	1.82745	0.05002
orf19.7661	HMI1	ATP-dependent 3' - 5' helicase involved in maintenance of mitochondrial DNA; ortholog of S. cerevisiae Hmi1; rat catheter biofilm repressed	1.57814	1.57814	0.33787	1.20955	1.20955	0.13181
orf19.4240	0	Ortholog(s) have role in GPI anchor biosynthetic process, cellular manganese ion homeostasis and endoplasmic reticulum, fungal-type vacuole membrane localization	1.5781	1.5781	0.1233	1.29684	1.29684	0.07836
orf19.4287	0	Putative oxidoreductase; Hap43-repressed gene; clade-associated gene expression	1.57741	1.57741	0.23025	1.15453	1.15453	0.04193
orf19.6790	0	Ortholog(s) have mRNA binding activity, role in 3'-UTR-mediated mRNA destabilization, mitochondrion organization and cytoplasmic mRNA processing body, cytoplasmic stress granule, cytosol, perinuclear region of cytoplasm localization	1.57603	1.57603	0.03267	1.47276	1.47276	0.046
orf19.857	FMO2	Protein with a monooxygenase domain; Spider biofilm induced	1.57588	1.57588	0.05775	1.39919	1.39919	0.00845
orf19.1327	RBT1	Cell wall protein with similarity to Hwp1; required for virulence; predicted glycosylation; fluconazole, Tup1 repressed; farnesol, alpha factor, serum, hyphal and alkaline induced; Rfg1, Rim101-regulated	1.5756	1.5756	0.10601	1.44227	1.44227	0.10081
orf19.4180	SEC72	ER protein-translocation complex component; regulated by Gcn4p; repressed in response to amino acid starvation (3-aminotriazole treatment); sumoylation target	1.57389	1.57389	0.07011	1.41901	1.41901	0.0133
orf19.6021	IHD2	Protein of unknown function; induced during hyphae development; induced in low iron; Spider biofilm induced	1.57128	1.57128	0.01315	1.65002	1.65002	0.00572
orf19.4543	UGA2	Predicted succinate semialdehyde dehydrogenase; predicted role in glutamate catabolism; transcription regulated by Mig1, Tup1, Gcn4; mutants are viable	1.57043	1.57043	0.22739	1.69835	1.69835	0.05929
orf19.2752	ADR1	C2H2 transcription factor; ortholog of S. cerevisiae Adr1 but mutant phenotype suggests a different set of target genes; transposon mutation affects filamentous growth; Spider biofilm induced	1.57036	1.57036	0.01447	1.19843	1.19843	0.27028
orf19.6307	0	Ortholog of C. dubliniensis CD36 : Cd36_30250, Candida tenuis NRRL Y-1498 : CANTEDRAFT_98619, Debaryomyces hansenii CBS767 : DEHA2G22594g and Pichia stipitis Pignal : PICST_50168	1.57031	1.57031	0.05903	1.4489	1.4489	0.04555
orf19.139	TRA1	Subunit of the NuA4 histone acetyltransferase complex	1.56742	1.56742	0.10264	1.08197	1.08197	0.12157
orf19.1403	0	Ortholog(s) have ATP:ADP antiporter activity, calcium ion binding activity, role in ADP transport, ATP transport, mitochondrial transport and mitochondrion localization	1.56683	1.56683	0.17608	1.22772	1.22772	0.07686
orf19.6143	0	Predicted long-chain-alcohol oxidase; Spider biofilm induced	1.56581	1.56581	0.14377	1.56067	1.56067	0.18373
orf19.94	0	Protein of unknown function; Spider biofilm induced	1.56432	1.56432	0.08413	1.505	1.505	0.06201
orf19.2986	0	Ortholog of C. dubliniensis CD36 : Cd36_02750, C. parapsilosis CDC317 : CPAR2_106015, Candida tenuis NRRL Y-1498 : CANTEDRAFT_107500 and Debaryomyces hansenii CBS767 : DEHA2D08250g	1.56431	1.56431	0.02951	-1.04854	0.9537	0.99001
orf19.4370	0	Protein of unknown function; induced by nitric oxide; oxidative stress-induced via Cap1; fungal-specific (no human or murine homolog)	1.56399	1.56399	0.00691	1.42241	1.42241	0.08694
orf19.3180	0	Ortholog(s) have phosphatidylinositol-4,5-bisphosphate 5-phosphatase activity, role in phosphatidylinositol dephosphorylation and endoplasmic reticulum localization	1.56235	1.56235	0.0192	1.47376	1.47376	0.03712
orf19.899	0	Ortholog of C. dubliniensis CD36 : Cd36_18040, C. parapsilosis CDC317 : CPAR2_211790, Candida tenuis NRRL Y-1498 : CANTEDRAFT_109928 and Debaryomyces hansenii CBS767 : DEHA2E21010g	1.56227	1.56227	0.06364	1.19083	1.19083	0.22992
orf19.428	0	Putative serine/threonine kinase; induced during planktonic growth; rat catheter biofilm repressed	1.56101	1.56101	0.01936	1.54644	1.54644	0.0508
orf19.2397.3	0	Putative aminotransferase; Hap43-repressed; homozygous Tn insertion decreases colony wrinkling in filament-inducing conditions, does not block true hypha formation in liquid media; rat catheter and Spider biofilm induced	1.56074	1.56074	0.24509	1.2196	1.2196	0.22161
orf19.2344	ASR1	Heat shock protein; transcript regulated by cAMP, osmotic stress, ciclopirox olamine, ketoconazole; repressed by Cyr1, Ras1; colony morphology-related regulated by Ssn6; stationary phase enriched; Hap43-induced; Spider biofilm induced	1.55996	1.55996	0.0819	2.81717	2.81717	0.00788
orf19.2474	PRC3	Putative carboxypeptidase Y precursor; transcript regulated by Nrg1 and Mig1; regulated by Gcn2 and Gcn4	1.55885	1.55885	0.13814	1.5847	1.5847	0.08482
orf19.376	0	Protein of unknown function; Hap43-repressed; Spider biofilm induced	1.55808	1.55808	0.00598	1.64252	1.64252	0.12285
orf19.6316	0	Predicted membrane transporter, member of the L-amino acid transporter-3 (LAT3) family, major facilitator superfamily (MFS)	1.55783	1.55783	0.14555	1.75728	1.75728	0.02343
orf19.7151	0	Ortholog of Candida albicans WO-1 : CAWG_05751	1.55716	1.55716	0.12152	1.1115	1.1115	0.09674
orf19.7044	RIM15	Ortholog(s) have protein kinase activity and role in age-dependent response to oxidative stress involved in chronological cell aging, conidiophore development, hyphal growth, protein phosphorylation, regulation of meiosis	1.55658	1.55658	0.06613	1.20759	1.20759	0.00423
orf19.4299	MSW1	Protein similar to S. cerevisiae Msw1p, which is mitochondrial tryptophanyl-tRNA synthetase; Hap43p-repressed gene; likely to be essential for growth, based on an insertional mutagenesis strategy	1.55641	1.55641	0.26431	1.70107	1.70107	0.24086
orf19.2923	0	Predicted membrane transporter, member of the drug:proton antiporter (14 spanner) (DHA2) family, MFS superfamily; induced by alpha pheromone in SpiderM medium	1.55512	1.55512	0.22581	-1.11058	0.90043	0.14363
orf19.1953	0	Predicted protein of unknown function; merged with orf19.1952 in Assembly 21	1.55508	1.55508	0.00939	1.46079	1.46079	0.01772
orf19.556	0	Protein of unknown function; regulated by Ssn6	1.55407	1.55407	0.00271	1.74899	1.74899	0.01949
orf19.4898	0	Putative protein of unknown function; induced by prostaglandins	1.55402	1.55402	0.00073	1.45247	1.45247	0.01228
orf19.1641	0	Ortholog(s) have cytosol, extracellular region, nucleus localization	1.55348	1.55348	0.16591	1.30156	1.30156	0.1518
orf19.7563	BET2	Putative Type II geranylgeranyltransferase beta subunit; transcript regulated by Mig1	1.55142	1.55142	0.04978	1.44069	1.44069	0.00718
orf19.2662	0	Predicted ORF of unknown function; overlaps TLO34/orf19.2661	1.55105	1.55105	0.24557	1.53271	1.53271	0.03126
orf19.4756	0	Ortholog of S. cerevisiae : YTP1, C. dubliniensis CD36 : Cd36_08490, C. parapsilosis CDC317 : CPAR2_801590, Candida tenuis NRRL Y-1498 : CANTEDRAFT_109732 and Debaryomyces hansenii CBS767 : DEHA2C10384g	1.54937	1.54937	0.00693	1.13075	1.13075	0.05145
orf19.1975	0	Ortholog(s) have role in mRNA splicing, via spliceosome, regulation of DNA methylation and U4/U6 x U5 tri-snRNP complex, U5 snRNP localization	1.54929	1.54929	0.3564	1.49237	1.49237	0.00903
orf19.6263	0	Predicted MFS membrane transporter; member of the monocarboxylate porter (MCP) family; Spider biofilm induced	1.54823	1.54823	0.0784	1.69504	1.69504	0.0317
orf19.7521	REP1	Protein involved in negative regulation of MDR1 transcription; mutants show increased resistance to azole drugs	1.54794	1.54794	0.24138	2.2445	2.2445	0.04684
orf19.6563	KCH1	Ortholog of Kch1 a potassium transporter; mediates K+ influx and activates high-affinity Ca2+ influx system during mating pheromone response in S. cerevisiae; induced by alpha pheromone in SpiderM medium	1.54787	1.54787	0.59552	1.05921	1.05921	0.32104
orf19.6408	0	Putative DnaJ-like heat shock/chaperone; Hap43-repressed; Spider and F-12/CO2 biofilm induced	1.54618	1.54618	0.03368	1.79391	1.79391	0.04124
orf19.767	ERG3	C-5 sterol desaturase; introduces C-5(6) double bond into episterol; some clinical isolates show increased azole resistance and defects in hyphal growth and virulence; Efg1p-repressed; fluconazole-induced	1.54617	1.54617	0.16607	1.0764	1.0764	0.24735
orf19.6197	DHH1	Putative RNA helicase	1.5453	1.5453	0.27438	1.00548	1.00548	0.41796
orf19.570	IFF8	Putative GPI-anchored adhesin-like protein; decreased transcription is observed in an azole-resistant strain that overexpresses MDR1	1.54501	1.54501	0.18296	1.36129	1.36129	0.27771
orf19.2809	CTN3	Peroxisomal carnitine acetyl transferase; no obvious metabolic, hyphal, virulence defects in Ura+ strain; induced by macrophage engulfment, hyphal growth, starvation, nonfermentable carbon sources; rat catheter, Spider biofilm induced	1.54449	1.54449	0.07771	1.29517	1.29517	0.04711
orf19.2021	HGT8	High-affinity glucose transporter of the major facilitator superfamily; 20 members in the C. albicans glucose transporter family; 12 probable membrane-spanning segments; gene has intron; expressed in rich medium; flow model biofilm induced	1.54342	1.54342	0.32129	1.80546	1.80546	0.00229
orf19.2963	0	Has domain(s) with predicted NAD+ binding activity	1.54341	1.54341	0.35895	1.65548	1.65548	0.01344
orf19.7454	TAF60	Putative TFIID and SAGA complex subunit; mutation confers hypersensitivity to amphotericin B	1.54336	1.54336	0.20278	1.51761	1.51761	0.14589
orf19.7637	YHB4	Protein related to flavohemoglobins; not required for wild-type nitric oxide resistance; has predicted globin, FAD-binding, and NAD(P)-binding domains but lacks some conserved residues of flavohemoglobins; Hap43p-repressed gene	1.5426	1.5426	0.17161	1.46886	1.46886	0.10723
orf19.6849	ELC1	Putative elongin C; transcript regulated by Nrg1 and Mig1; regulated by Gcn2 and Gcn4	1.54207	1.54207	0.39881	1.58567	1.58567	0.00669
orf19.6822	0	Ortholog(s) have NEDD8 ligase activity, ubiquitin binding activity and role in positive regulation of ubiquitin-protein ligase activity, protein neddylation	1.54132	1.54132	0.01363	1.38953	1.38953	0.04062
orf19.1478	STT3	Putative oligosaccharyltransferase complex component; flow model and rat catheter biofilm repressed	1.54028	1.54028	0.27873	1.25376	1.25376	0.00357
orf19.5869	0	Ortholog(s) have role in metal ion transport, protein targeting to vacuole, ubiquitin-dependent protein catabolic process and endoplasmic reticulum, fungal-type vacuole membrane localization	1.54007	1.54007	0.02115	1.26117	1.26117	0.02041
orf19.3590	IPP1	Putative inorganic pyrophosphatase; antigenic; soluble protein in hyphae; macrophage-induced protein; protein present in exponential and stationary phase yeast; possibly essential (UAU1 method); sumoylation target; Spider biofilm repressed	1.53988	1.53988	0.11594	1.04433	1.04433	0.20317
orf19.7500	PXA1	Putative peroxisomal, half-size adrenoleukodystrophy protein (ALD or ALDp) subfamily ABC family transporter	1.53912	1.53912	0.20538	1.17885	1.17885	0.12886
orf19.5068	IRE1	Putative protein kinase; role in cell wall regulation; mutant is hypersensitive to caspofungin; Spider biofilm induced	1.53856	1.53856	0.21503	1.19349	1.19349	0.0565
orf19.916	0	Putative protein involved in apoptosis; Spider biofilm induced	1.53826	1.53826	0.2549	1.80047	1.80047	0.00226
orf19.1007	KCS1	Putative bZIP transcription factor; Spider biofilm induced	1.53825	1.53825	0.06434	1.31999	1.31999	0.06479
orf19.7149	0	Putative GTPase inhibitor; predicted role in endocytosis, protein targeting to vacuole; rat catheter biofilm repressed	1.53733	1.53733	0.14857	-1.15819	0.86341	0.12651
orf19.4706	0	Protein of unknown function; induced in cyr1 or ras1 mutant; induced by fluconazole, by alpha pheromone in SpiderM medium and during oralpharyngeal candidasis; Spider biofilm induced	1.53698	1.53698	0.03918	1.83808	1.83808	0.27579
orf19.4914.1	BLP1	Protein of unknown function, serum-induced	1.5368	1.5368	0.33086	1.17989	1.17989	0.36792
orf19.2618	MET2	Homoserine acetyltransferase; Hap43p-, Gcn4p-regulated; macrophage/pseudohyphal-repressed; not highly biofilm induced, in contrast to many sulfur amino acid metabolic genes; no human or murine homolog; virulence-group-correlated expression	1.53569	1.53569	0.0445	1.20975	1.20975	0.02056
orf19.3221	CPA2	Putative arginine-specific carbamoylphosphate synthetase; protein enriched in stationary phase yeast cultures; rat catheter biofilm induced; Spider biofilm induced	1.53559	1.53559	0.11559	1.85062	1.85062	0.00802
orf19.6577	FLU1	Multidrug efflux pump of the plasma membrane; MDR family member of the MFS (major facilitator superfamily) of transporters; involved in histatin 5 efflux; fungal-specific (no human/murine homolog)	1.53449	1.53449	0.0151	1.30841	1.30841	0.0607
orf19.6242	CYK3	Essential protein involved in cytokinesis; contains an SH3 domain	1.53427	1.53427	0.05793	1.11672	1.11672	0.52782
orf19.4347	0	Putative serine/threonine protein kinase; Hog1p-induced	1.5337	1.5337	0.19686	1.36885	1.36885	0.10041
orf19.2607	0	Protein of unknown function; Spider biofilm induced	1.53214	1.53214	0.07322	1.27586	1.27586	0.163
orf19.2890	0	Has domain(s) with predicted sugar:hydrogen symporter activity, role in carbohydrate transport and Golgi membrane, integral to membrane localization	1.53157	1.53157	0.10651	1.34379	1.34379	0.00351
orf19.7306	0	Aldo-keto reductase; increased transcript associated with MDR1 overexpression, benomyl or long-term fluconazole treatment; overexpression does not affect drug or oxidative stress sensitivity; stationary phase enriched; flow biofim repressed	1.52979	1.52979	0.0158	1.10336	1.10336	0.44248
orf19.6912	0	Putative ethanolamine kinase	1.52979	1.52979	0.26382	1.63278	1.63278	0.00203
orf19.677	CHO1	Putative phosphatidylserine synthase; ortholog of S. cerevisiae CHO1; transposon mutation affects filamentous growth; regulated by Nrg1, Tup1	1.52905	1.52905	0.32587	1.7433	1.7433	0.06627
orf19.6540	PFK2	Phosphofructokinase beta subunit; fructose 2,6-bisphosphate, AMP activated; ATP inhibited; phagocytosis, hyphal repressed; fluconazole-induced; stationary-phase enriched; flow model biofilm induced; rat catheter/Spider biofilm repressed	1.52835	1.52835	0.07295	-1.0842	0.92234	0.70159
orf19.5644	0	Ortholog(s) have role in ascospore wall assembly, spore membrane bending pathway and cytoplasm, prospore membrane localization	1.52803	1.52803	0.00504	1.09008	1.09008	0.02091
orf19.7128	SYS1	Putative Golgi integral membrane protein; transcript regulated by Mig1	1.52766	1.52766	0.18904	1.17173	1.17173	0.04377
orf19.1401	EAP1	GPI-anchored cell wall adhesin; Efg1-regulated; mutant suppresses cell adhesion, filamentation, invasive growth defects of S. cerevisiae flo8 or flo11 mutant; biofilm induced; required for biofilm formation; Bcr1-repressed in a/a biofilms	1.52698	1.52698	0.10273	-1.00863	0.99144	0.65999
orf19.3267	0	Ortholog(s) have palmitoyltransferase activity and role in ascospore wall assembly, cortical actin cytoskeleton organization, establishment of cell polarity, protein palmitoylation, regulation of exocytosis, vacuole fusion, non-autophagic	1.52584	1.52584	0.29629	1.04663	1.04663	0.17683
orf19.4735	0	Ornithine cyclodeaminase family protein; Sef1, Sfu1, and Hap43-regulated; ortholog of S. cerevisiae YGL159W and S. pombe SPAP11E10.01; rat catheter biofilm induced	1.52566	1.52566	0.00627	1.53197	1.53197	0.00903
orf19.1345	LIP8	Secreted lipase, member of a differentially expressed lipase gene family with possible roles in nutrition and/or in creating an acidic microenvironment; LIP5 and LIP8 are expressed at all stages of both mucosal and systemic infection	1.52547	1.52547	0.0239	1.11063	1.11063	0.03956
orf19.6854	ATP1	ATP synthase alpha subunit; antigenic in human/mouse; at hyphal surface; ciclopirox, ketoconazole, flucytosine induced; Efg1, caspofungin repressed; may be essential; sumoylation target; stationary phase-enriched; Spider biofilm repressed	1.52522	1.52522	0.02234	1.2783	1.2783	0.00344
orf19.3843	0	Ortholog(s) have role in filamentous growth, posttranslational protein targeting to membrane, translocation and Sec62/Sec63 complex localization	1.52512	1.52512	0.41302	1.22949	1.22949	0.02268
orf19.5305	RHD3	GPI-anchored yeast-associated cell wall protein; induced in high iron; clade-associated gene expression; not essential for cell wall integrity; fluconazole-repressed; flow model and Spider biofilm repressed	1.52495	1.52495	0.29205	1.31095	1.31095	0.03014
orf19.459	ADP1	Putative PDR-subfamily ABC transporter; similar to WHITE subfamily proteins; gene used for strain identification by multilocus sequence typing	1.52438	1.52438	0.00611	1.65612	1.65612	0.00086
orf19.1623	CAP1	AP-1 bZIP transcription factor; apoptotic, oxidative stress response/resistance, multidrug resistance; nuclear in oxidative stress; complements S. cerevisiae yap1 mutant; oralpharyngeal candidasis-, human neutrophil, Spider biofilm induced	1.52418	1.52418	0.17802	1.39073	1.39073	0.07197
orf19.1440.2	0	Ortholog of C. dubliniensis CD36 : Cd36_62310	1.52405	1.52405	0.06273	1.86275	1.86275	0.02303
orf19.3065	DAO1	Putative D-amino acid oxidase; transcription is regulated upon yeast-hyphal switch	1.52383	1.52383	0.20521	1.30184	1.30184	0.08135
orf19.5897	0	Ortholog(s) have Seh1-associated complex, cytosol, extrinsic to fungal-type vacuolar membrane localization	1.5226	1.5226	0.04041	1.24645	1.24645	0.02467
orf19.1725	0	Putative adhesin-like protein	1.52126	1.52126	0.15605	-1.23967	0.80667	0.23765
orf19.1816	ALS3	Cell wall adhesin; epithelial adhesion, endothelial invasion; alleles vary in adhesiveness; immunoprotective in mice; binds SspB adhesin of S. gordonii in mixed biofilm; induced in/required for Spider biofilm; flow model biofilm repressed	1.52083	1.52083	0.21457	1.14481	1.14481	0.20309
orf19.7611	TRX1	Thioredoxin; involved in response to reactive oxygen species; biofilm, benomyl, flucytosine, peroxide, Hap43 induced; amphotericin B, caspofungin repressed; induced by human neutrophils; macrophage-repressed gene	1.52013	1.52013	0.0533	1.20978	1.20978	0.00902
orf19.6351	0	Ortholog of C. dubliniensis CD36 : Cd36_11880, Candida tenuis NRRL Y-1498 : cten_CGOB_00231, Debaryomyces hansenii CBS767 : DEHA2D04928g and Pichia stipitis Pignal : PICST_29234	1.51902	1.51902	0.31621	1.00013	1.00013	0.5635
orf19.2340	CDC48	Putative microsomal ATPase; plasma membrane-localized; regulated by Gcn2 and Gcn4; induced by amino acid starvation (3-AT); macrophage/pseudohyphal-repressed; protein levels decrease in stationary phase yeast; Spider biofilm repressed	1.51857	1.51857	0.09249	1.13232	1.13232	0.21467
orf19.211	0	Predicted homeodomain-like transcription factor; also has a metal-binding Ada DNA repair protein domain; Spider biofilm induced	1.51781	1.51781	0.00324	1.2674	1.2674	0.1416
orf19.4777	DAK2	Putative dihydroxyacetone kinase; repressed by yeast-hypha switch; fluconazole-induced; caspofungin repressed; protein enriched in stationary phase yeast cultures; flow model biofilm induced; rat catheter and Spider biofilm repressed	1.51778	1.51778	0.07964	-1.11879	0.89382	0.336
orf19.56	ARG2	Putative enzyme of arginine biosynthesis; transcription of genes of arginine biosynthesis pathway, except for ARG2, is induced upon phagocytosis by macrophage	1.51633	1.51633	0.07717	1.33882	1.33882	0.0035
orf19.7365	0	Ortholog(s) have ubiquitin-protein ligase activity and role in negative regulation of apoptotic process, negative regulation of gluconeogenesis, proteasome-mediated ubiquitin-dependent protein catabolic process	1.51594	1.51594	0.14213	1.34027	1.34027	0.01226
orf19.2653	0	Protein with a transient receptor potential (TRP) ion channel domain; mutants are viable; rat catheter and Spider biofilm induced; flow model biofilm repressed	1.51583	1.51583	0.0485	1.21709	1.21709	0.00019
orf19.2836	0	Protein with similarity to carbonic anhydrases	1.51469	1.51469	0.13504	2.07626	2.07626	0.00119
orf19.4169	0	Ortholog of C. dubliniensis CD36 : Cd36_40780, Candida tenuis NRRL Y-1498 : CANTEDRAFT_116553, Lodderomyces elongisporus NRLL YB-4239 : LELG_04263 and Debaryomyces hansenii CBS767 : DEHA2G21736g	1.51389	1.51389	0.01744	1.28394	1.28394	0.08926
orf19.7324	THI13	Thiamin pyrimidine synthase; synthesis of the thiamine precursor hydroxymethylpyrimidine phosphate; single-turnover enzyme that provides histidine for HMP-P formation; induced by nitric oxide independent of Yhb1; Spider biofilm induced	1.51352	1.51352	0.02869	1.46344	1.46344	0.01671
orf19.741	0	Dubious open reading frame	1.51347	1.51347		1.03904	1.03904
orf19.2170	PHM7	Putative transporter; fungal-specific; Hog1-repressed; repressed by 17-beta-estradiol, ethynyl estradiol; Hap43-induced; Spider biofilm induced	1.51332	1.51332	0.15299	1.34975	1.34975	0.05887
orf19.7200	0	Ortholog of C. dubliniensis CD36 : Cd36_73480, Pichia stipitis Pignal : PICST_30727, Candida tropicalis MYA-3404 : CTRG_05165 and Candida albicans WO-1 : CAWG_05712	1.51291	1.51291	0.17845	1.76728	1.76728	0.03917
orf19.5392	NGT1	N-acetylglucosamine (GlcNAc)-specific transporter; role in GlcNAc (but not serum) induced hyphal growth; localizes to plasma membrane; induced by GlcNAc, macrophage engulfment; 12 transmembrane, major facilitator superfamily	1.51249	1.51249	0.02083	1.19059	1.19059	0.0141
orf19.4665	0	Protein of unknown function; Spider biofilm induced	1.51067	1.51067	0.74076	1.46086	1.46086	0.13516
orf19.6720	0	P-Loop domain-containing protein of unknown function; transposon mutation affects filamentous growth; Spider biofilm induced	1.51043	1.51043	0.21464	1.24192	1.24192	0.1928
orf19.5625	0	Ortholog of C. dubliniensis CD36 : Cd36_63640, Pichia stipitis Pignal : PICST_32878, Candida guilliermondii ATCC 6260 : PGUG_03423 and Candida tropicalis MYA-3404 : CTRG_02106	1.50998	1.50998	0.11143	1.04021	1.04021	0.49451
orf19.704	SOL3	Putative 6-phosphogluconolactonase; present in exponential and stationary growth phase yeast cultures; macrophage-downregulated protein; Spider biofilm repressed	1.5094	1.5094	0.02204	1.40705	1.40705	0.192
orf19.860	BMT8	Putative beta-mannosyltransferase, member of a 9-gene family including characterized BMT genes with roles in beta-1,2-mannosylation of cell wall phosphopeptidomannan; transposon insertion in promoter region causes decreased colony wrinkling	1.50913	1.50913	0.00504	1.48187	1.48187	0.03578
orf19.5431	0	Protein of unknown function; Hap43-repressed; Spider biofilm induced	1.5088	1.5088	0.17255	1.32543	1.32543	0.03878
orf19.7680	CTA26	Putative transcription factor/activator; Med2 mediator complex ddomain; transcript is upregulated in an RHE model of oral candidiasis; member of a family of telomere-proximal genes; Efg1, Hap43-repressed	1.5084	1.5084	0.01454	1.41068	1.41068	0.05104
orf19.6113	0	Protein of unknown function; transcript detected on high-resolution tiling arrays	1.50826	1.50826	0.25282	1.08889	1.08889	0.50422
orf19.2151	NAG6	Protein required for wild-type mouse virulence and wild-type cycloheximide resistance; putative GTP-binding motif; similar to S. cerevisiae Yor165Wp; in gene cluster that encodes enzymes of GlcNAc catabolism; no human or murine homolog	1.50782	1.50782	0.16518	1.22967	1.22967	0.14935
orf19.4712	FGR6-3	Protein lacking an ortholog in S. cerevisiae; member of a family encoded by FGR6-related genes in the RB2 repeat sequence; transposon mutation affects filamentous growth	1.50489	1.50489	0.16823	1.13477	1.13477	0.25027
orf19.5713	YMX6	Putative NADH dehydrogenase; macrophage-downregulated gene; induced by nitric oxide; rat catheter biofilm induced	1.50363	1.50363	0.00208	1.74193	1.74193	0.00277
orf19.5830	LHS1	Protein similar to S. cerevisiae Hsp70p; predicted Kex2p substrate; possibly essential, disruptants not obtained by UAU1 method; flow model biofilm repressed	1.5025	1.5025	0.22571	1.17439	1.17439	0.06198
orf19.1659	ALG8	Putative glucosyltransferase involved in cell wall mannan biosynthesis; transcription is elevated in nik1 and sln1 homozygous null mutants, but not in the chk1 null mutant; possibly an essential gene, disruptants not obtained by UAU1 method	1.50189	1.50189	0.02316	1.42295	1.42295	0.00767
orf19.6196	0	Component of the SWI/SNF and RSC chromatin remodeling complexes; suggested role in chromosome maintenance; Spider biofilm induced	1.50111	1.50111	0.06112	1.50983	1.50983	0.07416
orf19.4732	SEC24	Protein with a possible role in ER to Golgi transport; induced upon yeast-hyphal switch; sumoylation target; Spider biofilm repressed	1.50039	1.50039	0.06598	-1.02377	0.97678	0.52658
orf19.2789	0	Ortholog of C. dubliniensis CD36 : Cd36_07040, C. parapsilosis CDC317 : CPAR2_208700, Candida tenuis NRRL Y-1498 : CANTEDRAFT_108836 and Debaryomyces hansenii CBS767 : DEHA2F25674g	1.50014	1.50014	0.25314	1.1223	1.1223	0.06324
orf19.2870	0	Protein of unknown function; rat catheter and Spider biofilm induced	1.50002	1.50002	0.07112	2.33669	2.33669	0.00061
orf19.3207	CCN1	G1 cyclin; required for hyphal growth maintenance (not initiation); cell-cycle regulated transcription (G1/S); Cdc28p-Ccn1p initiates Cdc11p S394 phosphorylation on hyphal induction; expression in S. cerevisiae inhibits pheromone response	1.49949	1.49949	0.17377	1.38314	1.38314	0.05046
orf19.3635	0	Ortholog of C. dubliniensis CD36 : Cd36_22580, C. parapsilosis CDC317 : CPAR2_406960, Candida tenuis NRRL Y-1498 : CANTEDRAFT_113677 and Debaryomyces hansenii CBS767 : DEHA2D03608g	1.49857	1.49857	0.15187	1.01594	1.01594	0.52248
orf19.6816	0	Putative xylose and arabinose reductase; flow model biofilm induced; Spider biofilm repressed	1.49784	1.49784	0.11455	1.26398	1.26398	0.04026
orf19.2059	0	Protein with homology to magnesium-dependent endonucleases and phosphatases; regulated by Sef1, Sfu1, and Hap43; Spider biofilm induced	1.49766	1.49766	0.26649	1.03433	1.03433	0.83517
orf19.5138	IFA21	IPF family A protein; mutants are viable; Spider biofilm induced	1.49681	1.49681	0.02691	1.59653	1.59653	0.04602
orf19.3826	0	Predicted transmembrane protein with a role in cell wall polymer composition; Plc1-regulated; Spider biofilm induced	1.49665	1.49665	0.02999	1.31467	1.31467	0.00912
orf19.891	0	Putative AMP deaminase; possibly an essential gene, disruptants not obtained by UAU1 method	1.49548	1.49548	0.00729	1.54613	1.54613	0.0098
orf19.6606	0	Ortholog of C. parapsilosis CDC317 : CPAR2_201040, Candida tenuis NRRL Y-1498 : CANTEDRAFT_112677, Debaryomyces hansenii CBS767 : DEHA2E02420g and Pichia stipitis Pignal : PICST_37559	1.49429	1.49429	0.05018	1.37808	1.37808	0.0173
orf19.5312	MET4	Putative transcription coactivator; predicted role in sulfur amino acid metabolism; required for yeast cell adherence to silicone substrate; Spider biofilm induced	1.49422	1.49422	0.23039	-1.06784	0.93647	0.88377
orf19.1693	CAS4	RAM cell wall integrity signaling network protein; cell separation, azole sensitivity; needed for hyphal growth; insertion mutation near 3' end of gene increases caspofungin sensitivity; pheromone/hyphal induced; flow biofilm repressed	1.49292	1.49292	0.25723	1.15694	1.15694	0.2858
orf19.7173	0	Ortholog of C. parapsilosis CDC317 : CPAR2_702310, C. dubliniensis CD36 : Cd36_73730, Lodderomyces elongisporus NRLL YB-4239 : LELG_04029 and Candida orthopsilosis Co 90-125 : CORT_0G02490	1.49253	1.49253	0.63645	1.00262	1.00262	0.66873
orf19.1212	0	Ortholog(s) have FFAT motif binding, phosphatidylinositol binding activity	1.4921	1.4921	0.12815	1.27416	1.27416	0.00421
orf19.7625	PGA1	Putative GPI-anchored protein; induced during cell wall regeneration; required for normal adhesion to host cells and for adherence during Sabouraud biofilm formation; Spider biofilm induced	1.49184	1.49184	0.04299	1.59003	1.59003	0.00465
orf19.90	0	Ortholog(s) have cytoplasm localization	1.49175	1.49175	0.11078	1.25261	1.25261	0.06174
orf19.3074	TLO10	Member of a family of telomere-proximal genes of unknown function	1.49146	1.49146	0.03817	1.51692	1.51692	0.05863
orf19.6588	NBP2	Protein containing an SH3 domain; involved in vacuolar fusion in hyphae; mutants form multiple germ tubes; Spider biofilm induced	1.49094	1.49094	0.02253	1.40257	1.40257	0.17238
orf19.541	0	Has domain(s) with predicted oxidoreductase activity, acting on paired donors, with incorporation or reduction of molecular oxygen, 2-oxoglutarate as one donor, and incorporation of one atom each of oxygen into both donors activity	1.49049	1.49049	0.0231	1.72273	1.72273	0.01006
orf19.11	0	Protein of unknown function; transcript regulated by Mig1 and Tup1; rat catheter biofilm induced	1.48965	1.48965	0.00512	1.33352	1.33352	0.0265
orf19.1793	0	Ortholog(s) have phosphatidylinositol binding activity, role in cellular response to nitrogen starvation, piecemeal microautophagy of nucleus and Golgi apparatus, endosome, extrinsic to membrane, fungal-type vacuole localization	1.48832	1.48832	0.06964	1.37006	1.37006	0.00741
orf19.1779	MP65	Cell surface mannoprotein; cell-wall glucan metabolism, adhesion; adhesin motif; O-glycosylation; induced by heat, germ tube formation, wall regeneration; mycelial antigen; diagnostic marker; fluconazole-repressed; Spider biofilm induced	1.48785	1.48785	0.24211	1.45942	1.45942	0.10314
orf19.2615	MDL1	Putative mitochondrial, half-size MDR-subfamily ABC transporter	1.48603	1.48603	0.09212	1.36217	1.36217	0.01693
orf19.7458	0	Ortholog of C. dubliniensis CD36 : Cd36_86660, Candida tenuis NRRL Y-1498 : cten_CGOB_00028, Candida tropicalis MYA-3404 : CTRG_05695 and Candida albicans WO-1 : CAWG_02979	1.4855	1.4855	0.01323	1.38157	1.38157	0.03382
orf19.328	NPR2	Putative urea transporter; induced during infection of murine kidney, compared to growth in vitro; has murine homolog	1.48431	1.48431	0.01439	1.20625	1.20625	0.198
orf19.204	0	Ortholog of C. dubliniensis CD36 : Cd36_23180, Candida tropicalis MYA-3404 : CTRG_01968 and Candida albicans WO-1 : CAWG_05983	1.48329	1.48329	0.04248	1.12908	1.12908	0.04989
orf19.1339	CPY1	Carboxypeptidase Y; transcript regulated at yeast-hypha transition or macrophage response; induced human neutrophils; regulated by Gcn2 and Gcn4; putative N-glycosylation	1.48257	1.48257	0.11199	1.3416	1.3416	0.03135
orf19.1365	0	Putative monooxygenase; mutation confers hypersensitivity to toxic ergosterol analog; constitutive expression independent of MTL or white-opaque status	1.48229	1.48229	0.09565	1.27346	1.27346	0.11371
orf19.2204.2	RHO2	Ortholog(s) have GTPase activity	1.48079	1.48079	0.0789	1.73537	1.73537	0.10679
orf19.7349	CHS4	Activator of Chs3p chitin synthase; required for wild-type wall chitin content, but not for hyphal growth; mutant resistant to Calcofluor white; prenylation and 2 transmembrane segments predicted; functional homolog of S. cerevisiae Chs4p	1.48007	1.48007	0.04067	-1.25341	0.79782	0.03273
orf19.4612	0	Protein with a dienelactone hydrolase domain; Hap43-repressed gene	1.47969	1.47969	0.44371	1.34231	1.34231	0.01095
orf19.6166	0	Ortholog of C. dubliniensis CD36 : Cd36_80810, C. parapsilosis CDC317 : CPAR2_101800, Candida tenuis NRRL Y-1498 : CANTEDRAFT_103482 and Debaryomyces hansenii CBS767 : DEHA2F17864g	1.47845	1.47845	0.02642	1.36962	1.36962	0.02028
orf19.6662	0	Putative coenzyme Q (ubiquinone) binding protein; transcript is upregulated in clinical isolates from HIV+ patients with oral candidiasis	1.47772	1.47772	0.09751	1.90382	1.90382	0.00391
orf19.7614	0	Protein of unknown function; Hap43-induced gene; mutant is viable	1.47739	1.47739	0.04293	-1.47359	0.67862	0.29038
orf19.6760	MDS3	TOR signaling pathway component; required for growth and hyphal formation at alkaline pH, for full virulence in a mouse model of systemic infection and for SD and Spider medium biofilm formation; role in chlamydospore formation	1.47641	1.47641	0.02856	1.10271	1.10271	0.37586
orf19.3973	0	Ortholog of Hua1, a zinc finger domain protein with sequence similarity to Type I J-proteins; flow model biofilm induced	1.47633	1.47633	0.01676	1.20029	1.20029	0.00162
orf19.4780	0	Predicted MFS family membrane transporter, member of the drug:proton antiporter (12 spanner) (DHA1) family; Spider biofilm induced	1.4761	1.4761	0.0973	2.01803	2.01803	0.00367
orf19.4669	AAT22	Aspartate aminotransferase; nitrogen metabolism; similar but not orthologous to S. cerevisiae Aat2; clade-associated gene expression; protein levels decrease in stationary phase yeast; mutant is viable; flow model biofilm repressed	1.47539	1.47539	0.19796	1.93237	1.93237	0.01325
orf19.6443	0	Protein with an enoyl-CoA hydratase related domain; Spider biofilm induced	1.47394	1.47394	0.10123	1.2923	1.2923	0.00093
orf19.6492	0	Predicted protein serine/threonine kinase and/or protein tyrosine kinase; Spider biofilm induced	1.47386	1.47386	0.15766	1.50343	1.50343	0.01837
orf19.1002	0	Protein of unknown function; Hap43-repressed gene	1.47341	1.47341	0.03334	1.19873	1.19873	0.02054
orf19.4820	0	Ortholog(s) have mitochondrion localization	1.47335	1.47335	0.12092	1.51986	1.51986	0.02053
orf19.5191	FGR6-1	Protein lacking an ortholog in S. cerevisiae; member of a family encoded by FGR6-related genes in the RB2 repeat sequence; transposon mutation affects filamentous growth	1.47332	1.47332	0.21879	1.07785	1.07785	0.22758
orf19.1120	FAV2	Adhesin-like protein; induced by mating factor in MTLa/a opaque cells, in cyr1 null, in filaments; regulated by Nrg1, Rfg1, Tup1, Tec1, Efg1, Ntd80, Rob1, Brg1; induced in oralpharyngeal candidasis; Spider biofilm induced	1.47262	1.47262	0.10914	2.10813	2.10813	0.01322
orf19.2785	ATP7	Putative subunit of the F1F0-ATPase complex; colony morphology-related gene regulation by Ssn6; farnesol, macrophage-downregulated protein abundance; protein present in exponential and stationary yeast growth phases; Hap43-induced	1.4724	1.4724	0.301	1.4912	1.4912	0.22515
orf19.2770	0	Ortholog of C. dubliniensis CD36 : Cd36_42220, C. parapsilosis CDC317 : CPAR2_500340, Debaryomyces hansenii CBS767 : DEHA2G17754g and Pichia stipitis Pignal : PICST_31424	1.46976	1.46976	0.27013	1.40794	1.40794	0.05094
orf19.736	SRB8	Putative RNA polymerase II mediator complex subunit; early-stage flow model biofilm induced	1.46952	1.46952	4.73391e-05	1.14045	1.14045	0.01782
orf19.346	ALT1	Putative alanine transaminase; mutation confers hypersensitivity to 5-fluorocytosine (5-FC); rat catheter and flow model biofilm induced	1.46931	1.46931	0.02543	1.45168	1.45168	0.04908
orf19.2208	0	Ortholog(s) have role in response to salt stress and cytoplasm localization	1.46889	1.46889	0.07807	1.20835	1.20835	0.09812
orf19.6469	0	Predicted ORF in retrotransposon Tca11 with similarity to the Gag-Pol region of retrotransposons, which encodes nucleocapsid-like protein, reverse transcriptase, protease, and integrase	1.46863	1.46863	0.34514	1.25435	1.25435	0.10649
orf19.6950	0	Putative vacuolar membrane transporter for cationic amino acids; Spider biofilm induced	1.4673	1.4673	0.44864	1.20623	1.20623	0.0277
orf19.6117	0	S. pombe ortholog SPAC5D6.04 is a predicted auxin family transmembrane transporter; ketoconazole and hypoxia induced	1.46624	1.46624	0.06013	1.11374	1.11374	0.12239
orf19.4845	TVP18	Putative integral membrane protein; fluconazole-induced	1.46565	1.46565	0.07344	1.00853	1.00853	0.41725
orf19.7111	0	Putative mitochondrial outer membrane protein membrane fission effector; possibly an essential gene, disruptants not obtained by UAU1 method	1.46431	1.46431	0.0072	1.16138	1.16138	0.14114
orf19.4798	0	Ortholog(s) have role in establishment of protein localization to plasma membrane and mitochondrion, plasma membrane localization	1.4641	1.4641	0.11893	1.32026	1.32026	0.028
orf19.1738	UGP1	UTP-glucose-1-phosphaturidyl transferase; localizes to yeast, not hyphal cell surface; Hog1-repressed; stationary phase enriched; induced in oralpharyngeal candidasis; rat catheter biofilm repressed; Bcr1-repressed in RPMI a/a biofilms	1.46384	1.46384	0.10817	1.3148	1.3148	0.04305
orf19.398	0	Ortholog of C. dubliniensis CD36 : Cd36_08040, C. parapsilosis CDC317 : CPAR2_207180, Candida tenuis NRRL Y-1498 : CANTEDRAFT_114140 and Debaryomyces hansenii CBS767 : DEHA2G13992g	1.46363	1.46363	0.11511	1.34905	1.34905	0.01034
orf19.169	CHO2	Putative phosphatidyl-ethanolamine N-methyltransferase; fungal-specific (no human or murine homolog); amphotericin B repressed; Hap43p-induced gene	1.46308	1.46308	0.01539	1.27118	1.27118	0.32461
orf19.7593	0	Putative asparaginase; predicted role in asparagine catabolism; Spider biofilm induced	1.46281	1.46281	0.08328	1.21662	1.21662	0.04339
orf19.3106	MET16	Putative 3'-phosphoadenylsulfate reductase; sulfur amino acid metabolism; reports differ on regulation during biofilm formation; fungal-specific; possibly an essential gene, disruptants not obtained by UAU1 method; Hap43p-repressed gene	1.46222	1.46222	0.02634	-1.21469	0.82325	0.27875
orf19.6444	0	Ortholog(s) have role in cellular response to amino acid starvation, meiosis, negative regulation of TOR signaling cascade, regulation of autophagic vacuole assembly	1.46118	1.46118	0.67275	1.05187	1.05187	0.14209
orf19.6745	TPI1	Triose-phosphate isomerase; antigenic in mouse/human; mutation affects filamentation; macrophage-repressed; protein in exponential and stationary growth phase yeast; possibly essential; flow model biofilm induced; Spider biofilm repressed	1.46069	1.46069	0.01219	1.6062	1.6062	0.01209
orf19.7282	PEX13	Protein required for peroxisomal protein import mediated by PTS1 and PTS2 targeting sequences; transcript induced in an RHE model of oral candidiasis; Hap43-repressed gene	1.46039	1.46039	0.02439	1.34039	1.34039	0.00773
orf19.2958	0	Planktonic growth-induced gene	1.45858	1.45858	0.08354	1.08526	1.08526	0.02006
orf19.3087.1	0	Ortholog of C. dubliniensis CD36 : Cd36_54140 and Candida albicans WO-1 : CAWG_04820	1.45834	1.45834	0.07574	1.07099	1.07099	0.89896
orf19.6003	0	Protein of unknown function; role in intracellular signal transduction; Spider biofilm induced	1.45757	1.45757	0.0337	-1.01875	0.9816	0.679
orf19.554	DIT2	Monooxygenase of the cytochrome P450 family; produces N,N'-bisformyl dityrosine from N-formyltyrosine; regulated by Nrg1, Mig1, and Tup1; role in chlamydospore formation; Spider biofilm induced	1.45735	1.45735	0.24233	1.25724	1.25724	0.08899
orf19.6803	HUT1	Ortholog(s) have UDP-galactose transmembrane transporter activity, role in UDP-galactose transmembrane transport, UDP-glucose transport, regulation of protein folding in endoplasmic reticulum and endoplasmic reticulum localization	1.45677	1.45677	0.23219	1.01315	1.01315	0.75388
orf19.4127	0	Ortholog(s) have actin filament binding activity, role in actin cortical patch localization, actin filament bundle assembly, endocytosis and actin cortical patch localization	1.45496	1.45496	0.09102	1.01592	1.01592	0.77192
orf19.7451	FUN31	Putative PAS kinase involved in cell wall damage response; similar to S. cerevisiae Psk1p, a putative serine/threonine protein kinase; induced by Mnl1 under weak acid stress; rat catheter and Spider biofilm induced	1.45476	1.45476	0.09143	1.18395	1.18395	0.05809
orf19.4014	0	Planktonic growth-induced gene	1.45384	1.45384	0.15593	1.56385	1.56385	0.04581
orf19.6869	0	Putative lipid raft associated protein; Spider biofilm induced	1.4536	1.4536	0.15894	1.25109	1.25109	0.05559
orf19.147	YAK1	Predicted serine-threonine protein kinase; involved in hyphal growth regulation and biofilm formation; flow model biofilm induced; induced in core caspofungin response	1.4526	1.4526	0.22834	1.37693	1.37693	0.08547
orf19.3677	0	Ortholog(s) have Atg8 ligase activity and role in C-terminal protein lipidation, CVT pathway, ascospore formation, cellular response to nitrogen starvation, macroautophagy, mitochondrion degradation, piecemeal microautophagy of nucleus	1.45183	1.45183	0.43552	-1.0964	0.91208	0.47129
orf19.5179	LIP5	Cold-activated secreted lipase, differentially expressed lipase gene family member with possible roles in nutrition and acidic microenvironment; LIP5 and LIP8 expressed at all stages of mucosal and systemic infection; affects filamentation	1.45158	1.45158	0.01916	1.05883	1.05883	0.19794
orf19.7392	DED1	Predicted ATP-dependent RNA helicase; RNA strand annealing activity; Spider biofilm induced	1.45148	1.45148	0.16499	1.21456	1.21456	0.18683
orf19.6313.2	MVB12	ESCRT-I complex subunit with a role in multivesicular body (MVB) trafficking; mutant displays growth defect on alkaline medium; Hap43p-repressed gene	1.45078	1.45078	0.21639	1.32354	1.32354	0.01749
orf19.7204	0	Ortholog(s) have glyoxysome localization	1.45069	1.45069	0.0023	1.28613	1.28613	0.11562
orf19.6141	HGT16	Putative glucose transporter of the major facilitator superfamily; the C. albicans glucose transporter family comprises 20 members; 12 probable membrane-spanning segments; gene has intron; expressed in rich medium with 2% glucose	1.45025	1.45025	0.0591	1.23216	1.23216	0.32171
orf19.209	DFG10	Ortholog(s) have role in dolichol biosynthetic process, dolichol-linked oligosaccharide biosynthetic process, polyprenol catabolic process, pseudohyphal growth and endoplasmic reticulum localization	1.45025	1.45025	0.05228	1.47935	1.47935	0.0095
orf19.7093	HGT13	Predicted sugar transporter, involved in glycerol utilization; member of the major facilitator superfamily; 12 transmembrane; gene has intron; oxidative stress-induced via Cap1p; expressed in rich medium, 2% glucose	1.45016	1.45016	0.14535	1.02785	1.02785	0.38913
orf19.7473	0	Ortholog(s) have role in endocytosis and actin cortical patch, cellular bud neck, cytoplasm localization	1.4489	1.4489	0.06285	1.03361	1.03361	0.77645
orf19.1685	ZCF7	Predicted Zn(II)2Cys6 transcription factor; mutant shows reduced colony wrinkling on Spider medium and is unable to utilize mannitol as a carbon source; mutants have increased colonization of mouse kidneys	1.44826	1.44826	0.01048	1.14293	1.14293	0.01539
orf19.1397	0	Has domain(s) with predicted heme binding activity	1.44782	1.44782	0.03834	1.08187	1.08187	0.14743
orf19.4066	0	Putative glycerol-3-phosphate acyltransferase; Hog1-repressed	1.44759	1.44759	0.28715	-1.13311	0.88253	0.05953
orf19.575	HYR3	Putative GPI-anchored adhesin-like protein; similar to Hyr1p induced in high iron; clade-specific repeat variation	1.44736	1.44736	0.22166	1.14481	1.14481	0.2585
orf19.3651	PGK1	Phosphoglycerate kinase; localizes to cell wall and cytoplasm; antigenic in murine/human infection; flow model biofilm, Hog1-, Hap43-, GCN-induced; repressed upon phagocytosis; repressed in Spider biofilms by Bcr1, Ndt80, Rob1, Brg1	1.44652	1.44652	0.32226	1.39492	1.39492	0.05587
orf19.6227	0	Ortholog of C. dubliniensis CD36 : Cd36_06390, C. parapsilosis CDC317 : CPAR2_209040, Candida tenuis NRRL Y-1498 : CANTEDRAFT_114052 and Debaryomyces hansenii CBS767 : DEHA2D14300g	1.44618	1.44618	0.81682	-1.00782	0.99224	0.60774
orf19.5177	0	Ortholog of Candida albicans WO-1 : CAWG_05627	1.44615	1.44615	0.18996	1.18742	1.18742	0.30648
orf19.7566	0	Predicted amino acid transport domain; transcript upregulated in clinical strains from HIV+ patients with oral candidiasis; alkaline upregulated by Rim101; rat catheter, Spider and flow model biofilm induced	1.44461	1.44461	0.13515	1.07115	1.07115	0.32817
orf19.1541	0	Protein with a globin-like domain; repressed by alpha pheromone in SpiderM medium; Spider biofilm induced	1.4445	1.4445	0.13178	1.2405	1.2405	0.04059
orf19.7140	0	Putative catechol o-methyltransferase; stationary phase enriched protein; transcription upregulated in clinical isolates from HIV+ patients with oral candidiasis; Spider biofilm repressed	1.44436	1.44436	0.2817	1.20052	1.20052	0.19023
orf19.2848	0	Predicted regulatory subunit of the Atg1 signaling complex; required for vesicle formation during autophagy and the cytoplasm-to-vacuole targeting (Cvt) pathway; Spider biofilm induced	1.44379	1.44379	0.09348	1.31668	1.31668	0.06366
orf19.6053	CIS2	Putative role in regulation of biogenesis of the cell wall; upregulated in biofilm; Gcn4p-regulated	1.44156	1.44156	0.07877	1.44202	1.44202	0.00147
orf19.2813	0	Ortholog of Candida albicans WO-1 : CAWG_02711	1.44128	1.44128	0.03725	1.0957	1.0957	0.10788
orf19.184	MDM10	Predicted component of the mitochondrial sorting and assembly machinery (SAM complex) and ER-mitochondria encounter structure (ERMES) complex with a role in protein import into mitochondria	1.44072	1.44072	0.0119	1.18859	1.18859	0.02248
orf19.540	0	Has domain(s) with predicted palmitoyl-(protein) hydrolase activity and role in cellular protein modification process	1.44056	1.44056	0.04506	1.34361	1.34361	0.03607
orf19.3629	DSE1	Essential cell wall protein involved in cell wall integrity and rigidity; periodic mRNA expression peaks at M/G1 phase; Ace2p-induced; required for virulence in a mouse model of infection	1.44051	1.44051	0.22339	1.02725	1.02725	0.37862
orf19.2606	HDA1	Histone deacetylase; inducer of filamentation; conserved deacetylation motif; regulates white-to-opaque switch frequency but not opaque-to-white switch; greater expression in white cells than opaque cells; inhibited by trichostatin-A;	1.44035	1.44035	0.37622	1.31656	1.31656	0.09241
orf19.3325	0	Putative glycogen synthesis initiator; regulated by Efg1 and Efh1; Hog1-repressed; colony morphology-related gene regulation by Ssn6; induced by prostaglandins; flow model biofilm induced	1.44023	1.44023	0.22032	1.18449	1.18449	0.16909
orf19.2177	0	Sef1p-, Sfu1p-, and Hap43p-regulated gene; overlaps IFM3/orf19.2176	1.43987	1.43987	0.08547	1.51299	1.51299	2.60554e-05
orf19.4833	MLS1	Malate synthase; glyoxylate cycle enzyme; no mammalian homolog; regulated upon white-opaque switch; phagocytosis, strong oxidative stress induced; stationary phase enriched; flow model biofilm repressed; rat catheter, Spider biofilm induced	1.43879	1.43879	0.15895	1.02681	1.02681	0.93088
orf19.3003	0	Putative lipid-binding protein with a predicted role in calcium-dependent phospholipid-binding	1.43831	1.43831	0.01791	1.16733	1.16733	0.0316
orf19.4610	0	Predicted metallocarboxypeptidase; role in proteolysis; rat catheter biofilm repressed	1.43812	1.43812	0.09347	1.42909	1.42909	0.00305
orf19.7068	MAC1	Copper fist transcription factor; regulator of CTR1 copper transporter; induces CTR1 in low-copper conditions; ectopic expression causes copper-sensitive stimulation of filamentation in S. cerevisiae; Spider biofilm induced	1.43757	1.43757	0.0005	1.64964	1.64964	0.01735
orf19.5439	0	Ortholog of C. parapsilosis CDC317 : CPAR2_504010, C. dubliniensis CD36 : Cd36_80270, Lodderomyces elongisporus NRLL YB-4239 : LELG_02294 and Pichia stipitis Pignal : PICST_29581	1.43616	1.43616	0.34952	1.24627	1.24627	0.04695
orf19.3865	RFX1	Transcription factor; involved in DNA damage responses, morphogenesis, and virulence; Spider biofilm induced	1.43495	1.43495	0.24808	1.84612	1.84612	0.01658
orf19.6339	NRG2	Transcription factor; transposon mutation affects filamentous growth	1.43463	1.43463	0.0414	-1.40101	0.71377	0.06941
orf19.1481	HAP42	Predicted transcription factor; possibly an essential gene, disruptants not obtained by UAU1 method	1.43452	1.43452	0.03423	1.41833	1.41833	0.05967
orf19.5234	RBD1	Rhomboid-like protein; similar to putative intramembrane serine proteases; role in filamentous growth; Gcn4-regulated; caspofungin repressed; Spider biofilm induced	1.4323	1.4323	0.03832	1.31971	1.31971	0.05323
orf19.1208	0	Predicted ORF in the Major Repeat Sequence on chromosome 4; member of a family encoded by FGR6-related genes in the RB2 repeat sequence	1.43167	1.43167	0.22556	-1.00805	0.99202	0.46768
orf19.4507	0	Protein of unknown function; Hap43-repressed; rat catheter biofilm repressed	1.43165	1.43165	0.0772	1.1893	1.1893	0.01621
orf19.3765	RAX2	Plasma membrane protein involved in establishment of bud sites and linear direction of hyphal growth; filament induced, repressed by Rim101, Tup1; Hap43-induced; Spider biofilm induced	1.43149	1.43149	0.14362	1.16404	1.16404	0.02131
orf19.3936	GDE1	Glycerophosphocholine phosphodiesterase; mutation confers hypersensitivity to 5-fluorouracil (5-FU); F-12/CO2 early biofilm induced	1.43103	1.43103	0.1735	1.20511	1.20511	0.06832
orf19.345	0	Succinate semialdehyde dehydrogenase; for utilization of gamma-aminobutyrate (GABA) as a nitrogen source; part of 4-aminobutyrate and glutamate degradation pathways; rat catheter biofilm induced	1.43083	1.43083	0.00538	1.49401	1.49401	0.02515
orf19.6054	0	Protein with a Bul1 domain; binds the ubiquitin ligase Rsp5 and is involved in intracellular trafficking of a general amino acid permease Gap1; repressed in an azole-resistant strain overexpressing MDR1; Spider biofilm induced	1.43042	1.43042	0.51512	1.04173	1.04173	0.26352
orf19.3877	0	Ortholog of C. dubliniensis CD36 : Cd36_73360 and Candida albicans WO-1 : CAWG_01936	1.42994	1.42994	0.0795	1.22432	1.22432	0.24764
orf19.6423	0	Ortholog(s) have fructose-2,6-bisphosphate 2-phosphatase activity, role in glucose metabolic process and cytoplasm localization	1.42986	1.42986	0.01605	1.31305	1.31305	0.05841
orf19.2082	SAP30	Aspartic-type endopeptidase; involved in degradation of alpha pheromone; functional equivalent of S. cerevisiae Bar1; a-cell specific; induced by alpha pheromone	1.42969	1.42969	0.01966	1.16468	1.16468	0.17336
orf19.5753	HGT10	Glycerol permease involved in glycerol uptake; member of the major facilitator superfamily; induced by osmotic stress, at low glucose in rich media, during cell wall regeneration; 12 membrane spans; Hap43p-induced gene	1.42876	1.42876	0.0325	1.29383	1.29383	0.03181
orf19.3775	SSK2	MAP kinase kinase kinase (MAPKKK); regulates Hog1 activation and signaling; repressed by ciclopirox olamine	1.42837	1.42837	0.01306	1.22727	1.22727	0.02175
orf19.4534	0	Putative UBX-domain (ubiquitin-regulatory domain) protein; macrophage-downregulated gene	1.42775	1.42775	0.08545	1.38425	1.38425	0.0007
orf19.6048	0	Protein of unknown function; Spider biofilm induced	1.42769	1.42769	0.52378	1.47145	1.47145	0.02147
orf19.3031	SEC62	Putative endoplasmic reticulum (ER) protein-translocation complex subunit	1.42751	1.42751	0.08647	1.25413	1.25413	0.02992
orf19.491	0	Endoplasmic reticulum (ER) protein-translocation complex subunit	1.42664	1.42664	0.00156	1.34375	1.34375	0.08376
orf19.640	0	Integral membrane protein of the ER; role in the synthesis of beta-1,6-glucan in the cell wall; S. cerevisiae ortholog required for cell viability; Spider biofilm induced	1.42662	1.42662	0.57534	1.24998	1.24998	0.06184
orf19.635	0	Protein of unknown function; induced by alpha pheromone in SpiderM medium	1.42582	1.42582	0.00446	1.06658	1.06658	0.78772
orf19.7503	CDA2	Putative chitin deacetylase; transcription is positively regulated by Tbf1p	1.42515	1.42515	0.09351	1.18492	1.18492	0.16073
orf19.5504	0	Ortholog of C. dubliniensis CD36 : Cd36_73400, C. parapsilosis CDC317 : CPAR2_703180, Candida tenuis NRRL Y-1498 : CANTEDRAFT_104803 and Debaryomyces hansenii CBS767 : DEHA2A04466g	1.42496	1.42496	0.03948	1.04852	1.04852	0.83502
orf19.5813	0	Putative adhesin-like protein; upregulated during growth in the mouse cecum; flow model, rat catheter and Spider biofilm induced	1.4241	1.4241	0.22267	1.36311	1.36311	0.04263
orf19.5735	CDC50	Putative endosomal protein; induced by Mnl1p under weak acid stress	1.42361	1.42361	0.07424	1.23632	1.23632	0.00011
orf19.4565	BGL2	Cell wall 1,3-beta-glucosyltransferase; mutant has cell-wall and growth defects, but wild-type 1,3- or 1,6-beta-glucan content; antigenic; virulence role in mouse systemic infection; rat catheter biofilm induced	1.4229	1.4229	0.27382	1.39032	1.39032	0.10589
orf19.2612	0	C2H2 zinc finger transcription factor; expression reduced in ssr1 null mutant; flow model biofilm induced	1.42286	1.42286	0.44422	1.14066	1.14066	0.18511
orf19.508	QDR1	Putative antibiotic resistance transporter; regulated by white-opaque switch, Nrg1, Tup1; Hap43, caspofungin repressed; repressed during chlamydospore formation; flow model biofilm induced; Spider biofilm repressed	1.42248	1.42248	0.24597	1.14195	1.14195	0.34855
orf19.5132	0	Protein of unknown function; transcript detected on high-resolution tiling arrays; Spider biofilm induced	1.42229	1.42229	0.19314	-1.14025	0.877	0.70344
orf19.1553	ENT3	Putative epsin; induced during the mating process; transcript is upregulated in an RHE model of oral candidiasis	1.42218	1.42218	0.07286	1.47966	1.47966	0.00069
orf19.2974	YKT6	Putative protein of the vacuolar SNARE complex; predicted role in vacuolar fusion; rat catheter biofilm repressed	1.42213	1.42213	0.25077	1.23877	1.23877	0.09888
orf19.2906	PGA41	Putative GPI-anchored protein; adhesin-like protein	1.42139	1.42139	0.074	1.51638	1.51638	0.03494
orf19.782	0	Ortholog(s) have serine hydrolase activity, triglyceride lipase activity, role in lipid homeostasis and lipid particle localization	1.41995	1.41995	0.07845	1.37876	1.37876	0.00577
orf19.5917	STP1	Transcription factor; regulates SAP2, OPT1 expression and thereby protein catabolism for nitrogen source; activated via amino-acid-induced proteolytic processing; macrophage/pseudohyphal-repressed; Spider biofilm repressed	1.41972	1.41972	0.33802	1.12559	1.12559	0.4116
orf19.2565	0	Predicted intermediate filament protein; required for nuclear and mitochondrial transmission to daughter buds in S. cerevisiae; Spider biofilm induced	1.41931	1.41931	0.00166	1.25169	1.25169	0.00574
orf19.2003	HNM1	Putative choline/ethanolamine transporter; mutation confers hypersensitivity to toxic ergosterol analog; colony morphology-related gene regulation by Ssn6; clade-associated gene expression	1.41897	1.41897	0.06936	1.26115	1.26115	0.12151
orf19.7300	0	Protein of unknown function; Spider biofilm induced	1.41884	1.41884	0.17946	1.24956	1.24956	0.09411
orf19.7046	MET28	Predicted bZIP domain-containing transcription factor; protein induced during the mating process; possibly essential, disruptants not obtained by UAU1 method; Hap43-repressed; rat catheter biofilm induced	1.41823	1.41823	0.07879	1.23426	1.23426	0.04661
orf19.6072	CDC13	Essential protein with similarity to S. cerevisiae Cdc13p, involved in telomere maintenance	1.41794	1.41794	0.24386	1.54426	1.54426	0.08488
orf19.5258	0	Protein of unknown function; induced by nitric oxide	1.41782	1.41782	0.00639	1.11616	1.11616	0.23729
orf19.2622	YPT31	Protein required for resistance to toxic ergosterol analog	1.41745	1.41745	0.14991	1.27438	1.27438	0.07053
orf19.1684	0	Ortholog of C. dubliniensis CD36 : Cd36_81500, C. parapsilosis CDC317 : CPAR2_503620, Candida tenuis NRRL Y-1498 : CANTEDRAFT_93693 and Debaryomyces hansenii CBS767 : DEHA2D15268g	1.41716	1.41716	0.08566	1.26462	1.26462	0.0075
orf19.5995	MCA1	Putative cysteine protease with similarity to S. cerevisiae Mca1p; has a role in apoptotic cell death upon H2O2 treatment; fungal-specific (no human or murine homolog); farnesol-induced	1.41699	1.41699	0.13743	1.07058	1.07058	0.30531
orf19.4199	SLY41	Protein involved in ER-to-Golgi transport; rat catheter and Spider biofilm induced	1.41672	1.41672	0.06905	2.33947	2.33947	0.00065
orf19.2973	0	Ortholog(s) have RNA binding, flap-structured DNA binding activity and role in nuclear-transcribed mRNA poly(A) tail shortening, positive regulation of endodeoxyribonuclease activity	1.41671	1.41671	0.1555	1.31354	1.31354	0.06533
orf19.4441	0	Ortholog(s) have DNA replication origin binding, double-stranded DNA binding, single-stranded DNA binding activity	1.41623	1.41623	0.13373	1.04319	1.04319	0.09251
orf19.3967	PFK1	Phosphofructokinase alpha subinit; activated by fructose 2,6-bisphosphate, AMP, ATP inhibited; activity reduced on hyphal induction; phagocytosis-repressed; fluconazole, flow model biofilm induced; rat catheter and Spider biofilm repressed	1.41621	1.41621	0.08528	-1.11893	0.89371	0.93109
orf19.3200	MTLA2	Master regulator (activator) of a-type mating; has HMG domain, which is predicted to bind DNA; gene has intron; not related to S. cerevisiae MATa2; a/alpha mating type may increase virulence, provides competitive advantage	1.41604	1.41604	0.0589	1.11977	1.11977	0.0065
orf19.10	ALK8	Alkane-inducible cytochrome P450; catalyzes hydroxylation of lauric acid to hydroxylauric acid; overproduction causes fluconazole resistance in WT and causes multidrug resistance in a cdr1 cdr2 double mutant; rat catheter biofilm repressed	1.41599	1.41599	0.09115	1.45476	1.45476	0.05701
orf19.4913	0	Ortholog(s) have ubiquitin binding activity, role in cellular protein localization, positive regulation of deubiquitinase activity and cell cortex of cell tip, cell division site, cytosol localization	1.41557	1.41557	0.01473	1.38459	1.38459	0.08768
orf19.5114	0	Sorting nexin; role in maintaining late-Golgi resident enzymes in their proper location by recycling molecules from the prevacuolar compartment; Spider biofilm induced	1.41507	1.41507	0.04749	1.12899	1.12899	0.15635
orf19.6757	GCY1	Aldo/keto reductase; mutation confers hypersensitivity to toxic ergosterol analog; farnesol-repressed; stationary phase enriched protein; flow model biofilm induced; Spider biofilm repressed	1.414	1.414	0.20981	1.13291	1.13291	0.11145
orf19.3226	0	Ortholog(s) have role in intracellular sterol transport and extracellular region, fungal-type vacuole lumen localization	1.4128	1.4128	0.06838	1.66698	1.66698	0.00842
orf19.7579	FGR34	Protein lacking an ortholog in S. cerevisiae; transposon mutation affects filamentous growth	1.41255	1.41255	0.00711	1.51179	1.51179	0.0024
orf19.4077	MIT1	Mannosylinositol phosphorylceramide (MIPC) synthase catalytic subunit; sphingolipid biosynthesis; fluconazole, caspofungin induced; macrophage-repressed; Spider biofilm induced	1.4125	1.4125	0.04188	1.42324	1.42324	0.04867
orf19.727	0	Predicted ORF overlapping the Major Repeat Sequence on chromosome R; member of a family encoded by FGR6-related genes in the RB2 repeat sequence	1.41216	1.41216	0.16238	1.18446	1.18446	0.31309
orf19.2449	0	Putative adhesin-like protein; macrophage-induced gene	1.41099	1.41099	0.21767	1.10373	1.10373	0.29106
orf19.991	DJP1	Similar to bacterial DnaJ; reported to have a role in peroxisome biogenesis; induced in low iron and upon adherence to polystyrene	1.41093	1.41093	0.22497	1.39805	1.39805	0.05017
orf19.6268	0	Putative cohesin complex subunit; expression downregulated in an ssr1 null mutant	1.41037	1.41037	0.07479	1.22231	1.22231	0.35321
orf19.1805	PEX14	Ortholog(s) have peroxisome matrix targeting signal-1 binding, peroxisome matrix targeting signal-2 binding, protein binding, bridging activity	1.41031	1.41031	0.09522	1.11762	1.11762	0.87702
orf19.4399	NCS2	Putative cytosolic thiouridylase subunit; Spider biofilm induced	1.4103	1.4103	0.01318	1.01133	1.01133	0.46339
orf19.7441	0	Ortholog(s) have role in cellular lipid metabolic process, mRNA export from nucleus, protein export from nucleus and nuclear envelope localization	1.40986	1.40986	0.45702	1.03321	1.03321	0.24407
orf19.5402	0	Ortholog of Candida albicans WO-1 : CAWG_02394	1.40974	1.40974	0.02818	-1.0244	0.97618	0.8232
orf19.1254	SEC23	Putative GTPase-activating protein; regulated upon yeast-hypha switch; Spider biofilm repressed	1.40967	1.40967	0.16873	1.04845	1.04845	0.49996
orf19.733	0	Ortholog(s) have endoplasmic reticulum localization	1.409	1.409	0.0931	1.11884	1.11884	0.35911
orf19.4076	MET10	Sulfite reductase; role in sulfur amino acid metabolism; induced by human whole blood or PMNs; Hog1-induced; possibly adherence-induced; flow model, Spider model, F-12/CO2 biofilm induced	1.40893	1.40893	0.05432	1.06732	1.06732	0.76512
orf19.3370	DOT4	Protein similar to ubiquitin C-terminal hydrolase; localizes to cell surface of hyphal cells, but not yeast-form cells; repressed upon high-level peroxide; Hap43p-induced; rat catheter biofilm induced	1.40888	1.40888	0.10177	1.33017	1.33017	0.01163
orf19.1409	VAC7	Ortholog of S. cerevisiae Vac7; integral vacuolar membrane protein involved in vacuole inheritance and morphology; mutants are viable	1.4079	1.4079	0.07178	1.03146	1.03146	0.25632
orf19.2157	DAC1	N-acetylglucosamine-6-phosphate (GlcNAcP) deacetylase; N-acetylglucosamine utilization; required for wild-type hyphal growth and virulence in mouse systemic infection; gene and protein are GlcNAc-induced; Spider biofilm induced	1.40787	1.40787	0.30576	1.14641	1.14641	0.17982
orf19.88	ILV5	Ketol-acid reductoisomerase; antigenic; regulated by Gcn4; GlcNAc, amino acid starvation (3-AT)-induced; macrophage-repressed protein; protein present in exponential and stationary phase; flow model and Spider biofilm repressed	1.40752	1.40752	0.09777	1.3379	1.3379	0.02742
orf19.4765	PGA6	GPI-anchored cell wall adhesin-like protein; induced by high iron; upregulated upon Als2 depletion; mRNA binds She3 and is localized to hyphal tips; Spider biofilm repressed	1.40724	1.40724	0.22112	1.46497	1.46497	0.00421
orf19.1888	0	Putative nicotinamide riboside hydrolase; cleaves N-glycosidic bonds in nucleosides; pyrimidine salvage and nicotinamide riboside salvage pathways; Spider biofilm induced	1.40677	1.40677	0.3426	1.37288	1.37288	0.05652
orf19.2823	RFG1	HMG domain transcriptional repressor of filamentous growth and hyphal genes; in Tup1-dependent and -independent pathways; binds DNA; transcript not regulated by oxygen or serum; not responsible for hypoxic repression; Spider biofilm induced	1.40499	1.40499	0.58966	1.39755	1.39755	0.00294
orf19.4072	IFF6	Putative GPI-anchored adhesin-like protein; opaque-specific transcript; macrophage-induced gene; Hap43-repressed gene; Spider biofilm induced	1.40487	1.40487	0.03883	1.24774	1.24774	0.12106
orf19.3627	0	Ortholog of C. dubliniensis CD36 : Cd36_22640, C. parapsilosis CDC317 : CPAR2_406910, Candida tenuis NRRL Y-1498 : CANTEDRAFT_104937 and Debaryomyces hansenii CBS767 : DEHA2D02706g	1.40439	1.40439	0.06459	1.55836	1.55836	0.00965
orf19.7569	SIK1	Putative U3 snoRNP protein; Hap43p-induced gene; physically interacts with TAP-tagged Nop1p	1.4025	1.4025	0.19967	1.62426	1.62426	0.10127
orf19.5779	RNR1	Ribonucleotide reductase large subunit; induced in low iron; transposon mutation affects filamentous growth; farnesol upregulated in biofilm; regulated by cell cycle, tyrosol, cell density; regulated by Sef1, Sfu1, and Hap43	1.40212	1.40212	0.63678	-1.23476	0.80987	0.8572
orf19.5599	MDL2	Putative mitochondrial, half-size MDR-subfamily ABC transporter	1.40151	1.40151	0.05162	1.05743	1.05743	0.44861
orf19.1070	0	Ortholog(s) have cytoplasm localization	1.40115	1.40115	0.00183	1.23293	1.23293	0.23379
orf19.2244	0	Similar to oxidoreductases and to S. cerevisiae Yjr096wp; Sfu1 repressed; induced by benomyl treatment, Ssr1; Hap43-repressed; flow model biofilm repressed	1.4004	1.4004	0.12752	1.59835	1.59835	0.04399
orf19.2160	NAG4	Putative transporter; fungal-specific; similar to Nag3p and to S. cerevisiae Ypr156Cp and Ygr138Cp; required for wild-type mouse virulence and wild-type cycloheximide resistance; gene cluster encodes enzymes of GlcNAc catabolism	1.40025	1.40025	0.09918	1.24113	1.24113	0.0951
orf19.7547	0	Ortholog(s) have phosphatidylinositol-3-phosphate binding, ubiquitin-protein ligase activity, role in protein ubiquitination and cytosol, fungal-type vacuole membrane, late endosome, nucleus localization	1.39999	1.39999	0.04527	1.48804	1.48804	0.00619
orf19.1651	0	Ortholog of C. dubliniensis CD36 : Cd36_81960, Pichia stipitis Pignal : psti_CGOB_00163, Candida tropicalis MYA-3404 : CTRG_02378 and Candida albicans WO-1 : CAWG_02525	1.39916	1.39916	0.02625	1.08986	1.08986	0.13106
orf19.7307	0	Putative oxidoreductase; similar to S. cerevisiae Pga3p; possible Kex2p substrate	1.39862	1.39862	0.19411	1.37946	1.37946	0.00695
orf19.1764	0	Protein of unknown function; rat catheter and Spider biofilm induced	1.3983	1.3983	0.32287	1.43152	1.43152	0.03678
orf19.1935	0	Dubious open reading frame	1.39798	1.39798	0.21763	1.74736	1.74736	0.03578
orf19.4668	0	Protein with a glycoside hydrolase domain; mutants are viable	1.3978	1.3978	0.00396	1.2807	1.2807	0.08048
orf19.2585	0	Ortholog of Candida albicans WO-1 : CAWG_01548	1.39566	1.39566	0.07685	1.28873	1.28873	0.12887
orf19.5308	0	Protein of unknown function; induced by Rgt1	1.39522	1.39522	0.10841	-1.23087	0.81244	0.18366
orf19.473	TPO4	Putative sperimidine transporter; fungal-specific (no human or murine homolog); Spider biofilm induced; promoter bound by Tec1 and Ndt80; Bcr1-repressed in RPMI a/a biofilms	1.39486	1.39486	0.26168	1.01849	1.01849	0.6122
orf19.1105	0	Ortholog of C. parapsilosis CDC317 : CPAR2_302980, C. dubliniensis CD36 : Cd36_53630, Pichia stipitis Pignal : PICST_32155 and Candida orthopsilosis Co 90-125 : CORT_0E05120	1.39473	1.39473	0.05281	1.07744	1.07744	0.9361
orf19.6442	PRP8	Protein similar to S. cerevisiae Prp8, a component of the U4/U6-U5 snRNP complex; repressed by alpha pheromone in SpiderM medium	1.39463	1.39463	0.01334	1.04655	1.04655	0.14987
orf19.7301	0	Has domain(s) with predicted DNA binding activity	1.3942	1.3942	0.07176	1.22081	1.22081	0.06782
orf19.4775	CTA8	Essential transcription factor, mediates heat shock transcriptional induction; in the absence of heat stress, Cta8p levels are modulated by growth temperature to regulate basal expression of genes involved in protein folding	1.39131	1.39131	0.35488	1.1388	1.1388	0.46565
orf19.5443	BNA4	Putative kynurenine 3-monooxygenase, involved in NAD biosynthesis; transposon mutation affects filamentous growth; Hap43p-repressed gene; oral infection upregulated; mutants have reduced capacity to damage oral epithelial cells	1.39043	1.39043	0.21791	1.6004	1.6004	0.03306
orf19.5025	MET3	ATP sulfurlyase; sulfate assimilation; repressed by Met, Cys, Sfu1, or in fluconazole-resistant isolate; Hog1, caspofungin, white phase-induced; induced on biofilm formation, even in presence of Met and Cys; Spider, F-12/CO2 biofilm induced	1.39014	1.39014	0.06306	1.28349	1.28349	0.73478
orf19.4471	0	Ortholog(s) have role in protein targeting to vacuole, re-entry into mitotic cell cycle after pheromone arrest and endoplasmic reticulum membrane localization	1.3894	1.3894	0.11718	1.36988	1.36988	0.05505
orf19.2722	CGR1	Negative regulator of yeast-form growth; HSP70 family member; induced by growth cessation at yeast-hyphal transition or in planktonic growth; physically interacts with Msi3p; similar to rat anti-aging gene, SMP30, stationary phase enriched	1.38878	1.38878	0.23525	1.3043	1.3043	0.00206
orf19.2559	CDC4	F-box subunit of SCF(CDC4) ubiquitin ligase; functional homolog of S. cerevisiae Cdc4; mutation/depletion causes hyperfilamentation; Sol1 is a substrate of SCF-Cdc4; Spider biofilm induced	1.38877	1.38877	0.27543	1.46125	1.46125	0.08298
orf19.3469	0	S. cerevisiae ortholog Stb1 has a role in regulation of MBF-specific transcription at Start; induced in a cyr1 null mutant; Spider biofilm induced	1.38835	1.38835	0.16794	1.06582	1.06582	0.03754
orf19.3392	DOG1	Putative 2-deoxyglucose-6-phosphatase; haloacid dehalogenase hydrolase/phosphatase superfamily; similar to S. cerevisiae Dog1, Dog2, Hor1, Rhr2; regulated by Nrg1, Tup1; Spider biofilm repressed	1.3881	1.3881	0.1762	-1.14215	0.87554	0.35291
orf19.5614	0	Putative ribonuclease H1; possibly an essential gene, disruptants not obtained by UAU1 method; flow model biofilm induced; Spider biofilm induced	1.38737	1.38737	0.05478	1.84153	1.84153	0.00686
orf19.2736	HFL2	HAP5-like; ortholog of S. cerevisiae Bur6, a heterodimeric NC2 transcription regulator complex subunit; flucytosine induced	1.38712	1.38712	0.05672	1.16048	1.16048	0.02035
orf19.7370	0	Possible G-protein coupled receptor; vacuolar membrane transporter for cationic amino acids; PQ-loop motif; rat catheter and Spider biofilm induced	1.3865	1.3865	0.65996	1.08361	1.08361	0.1512
orf19.5720	0	Predicted membrane transporter, member of the monocarboxylate porter (MCP) family, major facilitator superfamily (MFS); ketoconazole or caspofungin repressed; Spider biofilm induced	1.38638	1.38638	0.65053	1.67787	1.67787	0.06781
orf19.1587	HGT20	Putative glucose transporter of the major facilitator superfamily; the C. albicans glucose transporter family comprises 20 members; 12 probable membrane-spanning segments; regulated by Nrg1	1.38617	1.38617	0.01661	-1.3115	0.76249	0.26362
orf19.2272	AFT2	Putative Aft domain transcription factor; role in regulation of iron metabolism, oxidative stress, adhesion, hyphal growth, colony morphology, virulence; complements S. cerevisiae aft1 mutation; Spider biofilm induced	1.38609	1.38609	0.16264	1.04494	1.04494	0.07113
orf19.2278	0	Putative 20S proteasome assembly protein; filament induced; induced by alpha pheromone in SpiderM medium	1.38576	1.38576	0.28231	1.47171	1.47171	0.0072
orf19.1632	0	Ortholog(s) have cytosol, nucleus localization	1.38547	1.38547	0.02267	1.56246	1.56246	0.0803
orf19.1325	ECM38	Putative gamma-glutamyltransferase; alkaline upregulated; Spider biofilm induced; possibly an essential gene, disruptants not obtained by UAU1 method	1.38358	1.38358	0.14547	1.18592	1.18592	0.02136
orf19.1582	0	Predicted membrane transporter; member of the drug:proton antiporter (12 spanner) (DHA1) family, major facilitator superfamily (MFS); mRNA binds She3	1.38239	1.38239	0.03779	1.41614	1.41614	0.11892
orf19.3767	PEP1	Type I transmembrane sorting receptor for multiple vacuolar hydrolases; cycles between late-Golgi and prevacuolar endosome-like compartments; rat catheter biofilm repressed	1.38234	1.38234	0.71525	1.13381	1.13381	0.03031
orf19.1187	CPH2	Myc-bHLH transcription factor; promotes hyphal growth; directly regulates Tec1 to induce hypha-specific genes; probably homodimeric, phosphorylated; required for colonization of the mouse GI tract; rat catheter and Spider biofilm induced	1.38216	1.38216	0.03945	-1.05838	0.94484	0.80353
orf19.2158	NAG3	Putative MFS transporter; similar to Nag4; required for wild-type mouse virulence and cycloheximide resistance; in gene cluster that includes genes encoding enzymes of GlcNAc catabolism; Spider biofilm repressed	1.38148	1.38148	0.02958	1.57103	1.57103	0.0342
orf19.6391	0	Protein of unknown function; transcript upregulated in azole-resistant strain overexpressing MDR1; Spider biofilm induced	1.38111	1.38111	0.02319	1.0228	1.0228	0.44165
orf19.3605	PEX17	Putative peroxin	1.381	1.381	0.23947	1.40317	1.40317	0.04788
orf19.1564	0	Plasma membrane-localized protein of unknown function	1.38091	1.38091	0.16822	1.9698	1.9698	0.02233
orf19.317	PNP1	Purine nucleoside phosphorylase; metabolizes inosine and guanosine nucleosides; in the nicotinamide riboside salvage pathway; Spider biofilm repressed	1.38066	1.38066	0.00512	1.21183	1.21183	0.14891
orf19.3984	0	Protein of unknown function; induced in core caspofungin response; induced in ssr1 mutant; induced by nitric oxide independent of Yhb1; Spider biofilm induced	1.38066	1.38066	0.06543	1.23193	1.23193	0.0325
orf19.2905	0	Ortholog of Candida albicans WO-1 : CAWG_03194	1.38052	1.38052	0.1319	1.32997	1.32997	0.02864
orf19.4884	WOR1	Transcription factor ("master switch") of white-opaque phenotypic switching; required to establish and maintain the opaque state; opaque-specific, nuclear; regulates its own expression; suggested role in regulation of adhesion factors	1.38049	1.38049	0.15462	1.39066	1.39066	0.30543
orf19.1042	POR1	Mitochondrial outer membrane porin; in detergent-resistant membrane fraction (possible lipid raft component); antigenic in human, mouse; Hap43p-induced; flucytosine-, macrophage-, farnesol- induced; fluconazole, caspofungin repressed	1.38046	1.38046	0.06224	1.09682	1.09682	0.04998
orf19.3714	0	Ortholog of C. dubliniensis CD36 : Cd36_33530, C. parapsilosis CDC317 : CPAR2_201980, Candida tenuis NRRL Y-1498 : CANTEDRAFT_134293 and Debaryomyces hansenii CBS767 : DEHA2A10164g	1.38026	1.38026	0.08556	1.21994	1.21994	0.01551
orf19.2149	0	Putative sulfate permease; S. cerevisiae ortholog YPR003C localizes to the endoplasmic reticulum; regulated by Sef1p-, Sfu1p-, and Hap43p	1.37899	1.37899	0.03989	-1.06147	0.94209	0.80831
orf19.7141	UFE1	Protein interacting with Sec20p, possibly involved in retrograde transport between the Golgi and the endoplasmic reticulum; functional homolog of S. cerevisiae Ufe1p, which is an ER t-SNARE that mediates the retrograde traffic	1.3788	1.3788	0.42834	1.33029	1.33029	0.08145
orf19.6127	LPD1	Putative dihydrolipoamide dehydrogenase; soluble in hyphae; antigenic in human oral infection and murine systemic infection; macrophage-induced protein; protein present in exponential and stationary phase yeast cultures; Hap43p-repressed	1.37875	1.37875	0.23679	1.24111	1.24111	0.03396
orf19.3534	RHO3	Putative Rho family GTPase; possible substrate of protein farnesyltransferase and geranylgeranyltransferase type I; greater transcription in hyphal form than yeast form; plasma membrane-localized	1.37851	1.37851	0.02377	1.19934	1.19934	0.02516
orf19.5246	0	Protein of unknown function; Hap43-repressed gene	1.37753	1.37753	0.06691	1.06914	1.06914	0.06845
orf19.7214	0	Glucan 1,3-beta-glucosidase; regulated by Nrg1, Tup1 and possibly Tac1; induced by NO and during cell wall regeneration; stationary phase enriched; possibly essential (UAU1 method); F-12/CO2 early biofilm induced; flow biofilm repressed	1.37712	1.37712	0.02184	1.6026	1.6026	0.0239
orf19.3126	CCT6	Putative cytosolic chaperonin Cct ring complex subunit; mutation confers hypersensitivity to cytochalasin D; GlcNAc-induced protein; Spider biofilm repressed	1.37612	1.37612	0.15598	1.87176	1.87176	0.03926
orf19.2604	0	S. pombe ortholog SPAC2C4.06c is a predicted tRNA (cytosine-5-)-methyltransferase; Spider biofilm induced	1.37562	1.37562	0.08754	1.37894	1.37894	0.05653
orf19.6217	PGA63	Component COPII vesicle coat; required for vesicle formation in ER to Golgi transport; predicted GPI-anchor; flow model and Spider biofilm repressed	1.37498	1.37498	0.93117	-1.09565	0.9127	0.00973
orf19.7676	XYL2	D-xylulose reductase; immunogenic in mice; soluble protein in hyphae; induced by caspofungin, fluconazole, Hog1 and during cell wall regeneration; Mnl1-induced in weak acid stress; stationary phase enriched; flow model biofilm induced	1.37417	1.37417	0.15302	1.18728	1.18728	0.21886
orf19.775	0	Ortholog of C. dubliniensis CD36 : Cd36_04450, C. parapsilosis CDC317 : CPAR2_105460, Debaryomyces hansenii CBS767 : DEHA2D07128g and Pichia stipitis Pignal : PICST_80203	1.37405	1.37405	0.17388	1.42609	1.42609	0.01245
orf19.4654	0	Protein of unknown function; Spider biofilm induced	1.37365	1.37365	0.07957	1.43777	1.43777	0.00375
orf19.1955	0	Ortholog(s) have palmitoyltransferase activity, role in protein palmitoylation, protein targeting to membrane and endoplasmic reticulum palmitoyltransferase complex, extrinsic to endoplasmic reticulum membrane localization	1.3724	1.3724	0.11687	1.14747	1.14747	0.19544
orf19.3091	0	Protein of unknown function; repressed during core stress response	1.37192	1.37192	0.09309	1.39782	1.39782	0.19486
orf19.405	VCX1	Putative H+/Ca2+ antiporter; Spider biofilm repressed	1.37185	1.37185	0.05303	1.49009	1.49009	0.0063
orf19.7311	0	Protein of unknown function; Spider biofilm induced	1.37115	1.37115	0.03228	1.17897	1.17897	0.05416
orf19.23	RTA3	Similar to S. cerevisiae Rta1 (role in 7-aminocholesterol resistance) and Rsb1 (flippase); putative drug-responsive regulatory site; induced by fluphenazine, estradiol, ketoconazole, caspofungin; rat catheter biofilm induced	1.37102	1.37102	0.27638	1.13048	1.13048	0.16461
orf19.7354	LAC1	Ceramide synthase; required for biosynthesis of ceramides with C18:0 fatty acids, which serve as precursors for glucosylsphingolipids; caspofungin induced	1.37082	1.37082	0.00499	1.22447	1.22447	0.00394
orf19.7556	0	Ortholog of C. dubliniensis CD36 : Cd36_34965, C. parapsilosis CDC317 : CPAR2_200910, Candida tenuis NRRL Y-1498 : CANTEDRAFT_95984 and Debaryomyces hansenii CBS767 : DEHA2E02926g	1.3708	1.3708	0.49462	1.23197	1.23197	0.03854
orf19.7670	0	Putative Ca2+/H+ antiporter; oral infection upregulated gene; mutants have reduced capacity to damage oral epithelial cells	1.37076	1.37076	0.27064	1.60356	1.60356	0.0228
orf19.5861.1	0	Protein of unknown function; Spider biofilm induced	1.37033	1.37033	0.26437	1.13133	1.13133	0.06582
orf19.3665	SET6	Ortholog of S. cerevisiae Set6, a SET domain protein of unknown function; Hap43-induced; rat catheter and Spider biofilm induced	1.36917	1.36917	0.3044	1.38399	1.38399	0.06007
orf19.4878	0	Protein of unknown function; Hap43-repressed; rat catheter biofilm repressed	1.36904	1.36904	0.1283	1.24727	1.24727	0.03235
orf19.5919	MEA1	Protein similar to A. nidulans MesA, which is involved in localization of actin cables; Hap43p-induced gene	1.36813	1.36813	0.12581	1.11084	1.11084	0.25277
orf19.673	0	Has domain(s) with predicted FMN binding, oxidoreductase activity and role in oxidation-reduction process	1.3673	1.3673	0.01152	1.38581	1.38581	0.03704
orf19.1761	0	Predicted olichyl-diphosphooligosaccharide-protein glycotransferase; role in protein N-linked glycosylation; Spider biofilm repressed	1.36696	1.36696	0.05787	1.49111	1.49111	0.04606
orf19.3507	MCR1	NADH-cytochrome-b5 reductase; soluble in hyphae; alkaline downregulated; farnesol, ketoconazole or flucytosine induced; protein present in exponential and stationary growth phase yeast; YNB biofilm induced; rat catheter biofilm repressed	1.36693	1.36693	0.06743	2.16126	2.16126	0.019
orf19.6510	GRX1	Putative glutaredoxin; induced in low iron	1.36681	1.36681	0.17753	1.10307	1.10307	0.5213
orf19.4346	0	Ortholog(s) have protein anchor activity, role in COPII vesicle coating, protein localization to endoplasmic reticulum exit site and ER to Golgi transport vesicle membrane, endoplasmic reticulum exit site localization	1.36641	1.36641	0.02145	-1.11638	0.89575	0.36483
orf19.4805	0	Putative membrane protein; induced by alpha pheromone in SpiderM medium; Hap4-induced gene; Spider biofilm induced	1.36516	1.36516	0.05511	1.27354	1.27354	0.06988
orf19.5626	0	Protein of unknown function; Plc1-regulated; induced by Mnl1 under weak acid stress; flow model biofilm induced	1.36494	1.36494	0.32086	1.46293	1.46293	0.08628
orf19.1727	PMC1	Vacuolar calcium P-type ATPase; transcript regulated by calcineurin and fluconazole; mutant shows increased resistance to fluconazole, lithium; increased sensitivity to calcium; Spider biofilm induced	1.36449	1.36449	0.25273	1.05127	1.05127	0.2286
orf19.5970	0	Putative DNA repair helicase; transcriptionally induced by interaction with macrophage; fungal-specific (no human or murine homolog)	1.36251	1.36251	0.02879	1.12251	1.12251	0.03334
orf19.3380	HWP2	GPI-anchored, glycosylated cell wall protein; required for biofilm formation, adhesion, filamentous growth on some media; expressed in hyphae; mutant delayed in virulence; regulated by Efg1, Tup1; similar to Hwp1 and Rbt1 domains	1.36239	1.36239	0.23126	-1.10476	0.90518	0.66287
orf19.2699	ABP1	Ortholog of S. cerevisiae Abp1; actin-binding protein of the cortical actin cytoskeleton; caspofungin induced; protein only detected in stationary phase yeast-form cultures; Spider biofilm repressed	1.36209	1.36209	0.12188	1.0467	1.0467	0.42469
orf19.2401	0	Ortholog(s) have cysteine-type endopeptidase activity	1.36154	1.36154	0.05412	1.3036	1.3036	0.01646
orf19.5716	SAP4	Secreted aspartyl proteinase; sap4,5,6 mutant defective in protein utilization for nitrogen; virulence role complicated by URA3 effects; expressed during mucosal and systemic infections; N-glycosylated; rat catheter, Spider biofilm induced	1.36132	1.36132	0.09016	1.15577	1.15577	0.19346
orf19.6273	0	Ortholog of C. dubliniensis CD36 : Cd36_05960, C. parapsilosis CDC317 : CPAR2_301790, Candida tenuis NRRL Y-1498 : CANTEDRAFT_112420 and Debaryomyces hansenii CBS767 : DEHA2G15290g	1.36099	1.36099	0.11152	1.08979	1.08979	0.1217
orf19.6812	PMT2	Protein mannosyltransferase (PMT) with roles in hyphal growth and drug sensitivity; member of the PMT family which includes Pmt1p, Pmt2p, Pmt4p, Pmt5p, and Pmt6p; induced during cell wall regeneration; essential	1.36079	1.36079	0.04145	1.20631	1.20631	0.09467
orf19.4927	BNI1	Formin; role in cytoskeletal organization, cell polarity; role in systemic virulence in mouse; cell-cycle regulated localization to site of polarized growth, bud neck; localizes to Spitzenkorper of hyphae, minor localization at septum	1.36072	1.36072	0.08293	1.0071	1.0071	0.49982
orf19.7478	0	Ortholog(s) have antioxidant activity, di-trans,poly-cis-decaprenylcistransferase activity, protein heterodimerization activity, trans-hexaprenyltranstransferase activity	1.35967	1.35967	0.02243	1.11393	1.11393	0.57767
orf19.4607	0	Possible Golgi membrane protein; Hap43-repressed; hypha induced; flow model biofilm induced; Spider biofilm induced	1.35897	1.35897	0.05641	1.20746	1.20746	0.05859
orf19.6706	GYP7	Protein similar to S. cerevisiae Gyp7p (GTPase-activating protein for Ypt1p); caspofungin-induced	1.35785	1.35785	0.19533	1.55468	1.55468	0.00233
orf19.5688	0	Predicted ORF from Assembly 19; removed from Assembly 20; subsequently reinstated in Assembly 21 based on comparative genome analysis	1.35775	1.35775	0.22538	1.13287	1.13287	0.07201
orf19.5940	ZCF32	Predicted Zn(II)2Cys6 transcription factor; possibly an essential gene, disruptants not obtained by UAU1 method; Hap43-repressed	1.35681	1.35681	0.10574	1.09218	1.09218	0.25117
orf19.5147	LMO1	Protein involved together with Dck1p and Rac1p in invasive filamentous growth and cell wall integrity; acts upstream of MAP kinase Cek1p; has similarity to human ELMO1	1.35676	1.35676	0.11587	1.28878	1.28878	0.00349
orf19.4064	GPI7	Protein involved in attachment of GPI-linked proteins to cell wall; member of major facilitator superfamily; phosphodiesterase/nucleotide pyrophosphatase domain; similar to S. cerevisiae Gpi7p	1.35636	1.35636	0.03728	1.10146	1.10146	0.04843
orf19.7157	0	Protein with a tubulin binding cofactor C domain; flow model biofilm induced	1.35611	1.35611	0.07628	1.00677	1.00677	0.83624
orf19.4722	RTG1	Ortholog(s) have sequence-specific DNA binding RNA polymerase II transcription factor activity	1.3553	1.3553	0.0563	1.37384	1.37384	0.00416
orf19.3575	CDC19	Pyruvate kinase at yeast cell surface; Gcn4/Hog1/GlcNAc regulated; Hap43/polystyrene adherence induced; repressed by phagocytosis/farnesol; hyphal growth role; stationary phase enriched; flow model biofilm induced; Spider biofilm repressed	1.35525	1.35525	0.37192	1.27351	1.27351	0.1344
orf19.4753	PFK26	Putative 6-phosphofructo-2-kinase; protein repressed during the mating process	1.35433	1.35433	0.5263	-1.11755	0.89482	0.02139
orf19.5011	KAR9	Ortholog of S. cerevisiae Kar9; role in mitotic spindle positioning; nonessential; localizes to bud tip, bud neck, hyphal tip; wild-type localization requires actin and microtubule cytoskeleton; induced by alpha factor	1.35328	1.35328	0.12871	1.24324	1.24324	0.01739
orf19.5728	0	Putative cytochrome P450; Spider biofilm induced	1.35316	1.35316	0.08596	1.21373	1.21373	0.16774
orf19.4318	MIG1	C2H2 transcription factor; repressor; regulates genes for carbon source utilization; Tup1-dependent and independent functions; hyphal, Hap43 and caspofungin repressed; Spider and flow model biofilm induced	1.35297	1.35297	0.06366	1.14006	1.14006	0.8615
orf19.5194.1	0	Putative protein of unknown function; clade-associated gene expression	1.3521	1.3521	0.07756	1.06407	1.06407	0.20724
orf19.1672	0	Alpha subunit of COPI vesicle coatomer complex; role in ER to Golgi vesicle-mediated transport, retrograde vesicle-mediated transport, Golgi to ER transport; flow model biofilm repressed	1.35204	1.35204	0.31926	1.07986	1.07986	0.31669
orf19.7321	0	Ortholog(s) have role in re-entry into mitotic cell cycle after pheromone arrest and endoplasmic reticulum localization	1.35194	1.35194	0.23261	1.06056	1.06056	0.95204
orf19.337	VTI1	Ortholog(s) have SNAP receptor activity and role in Golgi to vacuole transport, intra-Golgi vesicle-mediated transport, vacuole fusion, non-autophagic, vesicle fusion	1.35152	1.35152	0.43068	1.33556	1.33556	0.00147
orf19.1297	0	Ortholog(s) have phosphatidylinositol-3-phosphate binding activity and role in CVT pathway, early endosome to Golgi transport, macroautophagy, mitochondrion degradation	1.35149	1.35149	6.18239e-05	1.27253	1.27253	0.222
orf19.1093	FLO8	Transcription factor; required for hyphal formation and CO2 induced white-opaque switching; regulates hyphal gene expression; required for virulence in mouse systemic infection; binds Efg1p; binds Mss11p via LisH motif; has LUFS domain	1.35052	1.35052	0.24343	-1.11605	0.89602	0.94174
orf19.6896	0	Predicted ORF overlapping the Major Repeat Sequence on chromosome 7; member of a family encoded by FGR6-related genes in the RB2 repeat sequence	1.35027	1.35027	0.17602	1.19977	1.19977	0.29982
orf19.2677	0	Putative GPI transamidase component; possibly an essential gene, disruptants not obtained by UAU1 method	1.34974	1.34974	0.00221	1.05691	1.05691	0.16166
orf19.5956	PIN3	Putative SH3-domain-containing protein; predicted role in actin cytoskeleton organization; Spider biofilm repressed	1.34964	1.34964	0.10219	1.42543	1.42543	0.02327
orf19.2397	0	Predicted membrane transporter, member of the anion:cation symporter (ACS) family, major facilitator superfamily (MFS); amphotericin B, caspofungin repressed; Hap43p-repressed	1.34864	1.34864	0.13217	1.40173	1.40173	0.01863
orf19.7583	ZCF39	Zn(II)2Cys6 transcription factor; mutants are viable; filament induced; required for yeast cell adherence to silicone substrate; Spider biofilm induced	1.34798	1.34798	0.57089	1.08087	1.08087	0.82613
orf19.3309	0	Ortholog of Candida tropicalis MYA-3404 : CTRG_04422 and Candida albicans WO-1 : CAWG_01254	1.3479	1.3479	0.1225	1.23556	1.23556	0.13199
orf19.3136	0	Ortholog(s) have transcription coactivator activity, role in DNA repair, cellular carbohydrate metabolic process and cytoplasm localization	1.34789	1.34789	0.08781	1.49955	1.49955	0.02819
orf19.1933	0	Ortholog(s) have role in peroxisome organization and peroxisomal membrane localization	1.34781	1.34781	0.00943	1.40365	1.40365	0.01769
orf19.335	0	Sef1p-, Sfu1p-, and Hap43p-regulated gene	1.34764	1.34764	0.02517	-1.01505	0.98518	0.99027
orf19.6868	0	Putative NADPH-dependent methylglyoxal reductase; homozygous transposon insertion causes decreased colony wrinkling under filamentous growth-inducing conditions, but does not block true hyphal formation in liquid media	1.34733	1.34733	0.25233	1.20424	1.20424	0.01827
orf19.5129	0	Ortholog of C. dubliniensis CD36 : Cd36_72910, C. parapsilosis CDC317 : CPAR2_704100, Candida tenuis NRRL Y-1498 : CANTEDRAFT_113193 and Debaryomyces hansenii CBS767 : DEHA2E23100g	1.34689	1.34689	0.22664	1.06796	1.06796	0.16137
orf19.4657	0	Ortholog(s) have phosphoprotein phosphatase activity, role in negative regulation of phospholipid biosynthetic process, nuclear envelope organization and Nem1-Spo7 phosphatase complex, integral to membrane, mitochondrion localization	1.34663	1.34663	0.15606	1.30179	1.30179	0.39106
orf19.7421	CYP5	Putative peptidyl-prolyl cis-trans isomerase; macrophage-downregulated protein level; protein level decrease in stationary phase cultures; predicted endoplasmic reticulum (ER) localization	1.34661	1.34661	0.31217	1.39324	1.39324	0.00666
orf19.685.1	0	Ortholog of C. parapsilosis CDC317 : CPAR2_602135, Candida tenuis NRRL Y-1498 : cten_CGOB_00042, Debaryomyces hansenii CBS767 : DEHA2F11858g and Pichia stipitis Pignal : PICST_60705	1.34656	1.34656	0.07167	1.87535	1.87535	0.00402
orf19.3673	0	Ortholog(s) have Rab guanyl-nucleotide exchange factor activity, role in ER to Golgi vesicle-mediated transport, chromosome organization and TRAPP complex, cytosol, nucleus localization	1.34618	1.34618	0.13378	1.15801	1.15801	0.07965
orf19.424	TRP99	Putative thioredoxin peroxidase/alkyl hydroperoxide reductase; induced in low iron; regulated by Gcn4; induced in response to amino acid starvation (3-AT treatment)	1.346	1.346	0.00223	1.14863	1.14863	0.29137
orf19.6244	0	Ortholog of C. dubliniensis CD36 : Cd36_06250, C. parapsilosis CDC317 : CPAR2_206820, Candida tenuis NRRL Y-1498 : CANTEDRAFT_125137 and Debaryomyces hansenii CBS767 : DEHA2G13266g	1.34459	1.34459	0.75252	1.13853	1.13853	0.10144
orf19.6937	PTR22	Oligopeptide transporter involved in uptake of di-/tripeptides; regulated by Stp2 and Stp3; transcript induced upon phagocytosis by macrophage; repressed by Rim101 at pH 8; flow model biofilm induced	1.34458	1.34458	0.34981	1.01247	1.01247	0.58294
orf19.1950	0	Ortholog(s) have phosphatase activity	1.34436	1.34436	0.01134	1.35867	1.35867	0.00439
orf19.2601	HEM1	Putative 5-aminolevulinate synthase; caspofungin repressed; induced by high iron, nitric oxide; regulated by Ssn6; Hap43-repressed; Spider biofilm induced	1.34405	1.34405	0.28628	-1.12198	0.89128	0.6094
orf19.6293	EMP24	COPII-coated vesicle component	1.34286	1.34286	0.07765	1.1287	1.1287	0.97478
orf19.4842	0	Protein of unknown function; Spider biofilm induced	1.34215	1.34215	0.36503	1.44729	1.44729	0.00086
orf19.6480	0	Ortholog(s) have role in UDP-glucose transport and COPI-coated vesicle, Golgi apparatus localization	1.34205	1.34205	0.03778	1.26159	1.26159	0.08222
orf19.6355	0	Ortholog(s) have role in ribosome biogenesis and cytosol, nucleolus localization	1.34205	1.34205	0.03087	1.45214	1.45214	0.05925
orf19.4508	0	Ortholog of Candida albicans WO-1 : CAWG_04200	1.34162	1.34162	0.0641	1.32476	1.32476	0.02776
orf19.2771	BEM3	Putative GTPase-activating protein (GAP) for Rho-type GTPase Cdc42p; involved in cell signaling pathways that control cell polarity; similar to S. cerevisiae Bem3p	1.34107	1.34107	0.01115	1.13146	1.13146	0.22382
orf19.938	0	Ortholog of C. dubliniensis CD36 : Cd36_50520, C. parapsilosis CDC317 : CPAR2_304000, Candida tenuis NRRL Y-1498 : cten_CGOB_00233 and Debaryomyces hansenii CBS767 : DEHA2E12408g	1.34035	1.34035	0.03722	1.00573	1.00573	0.93943
orf19.6195	0	Ortholog(s) have 3'-5'-exoribonuclease activity	1.33969	1.33969	0.18642	1.0866	1.0866	0.26095
orf19.6140	FRE30	Protein with similarity to ferric reductases; downregulated in response to amphotericin B, estradiol, or ciclopirox olamine, and upregulated by interaction with macrophage; un-merged from orf19.6139 in a revision of Assembly 21	1.33966	1.33966	0.07691	1.0861	1.0861	0.25826
orf19.5076	PFY1	Profilin; functional homolog of S. cerevisiae Pfy1; hyphae, macrophage/pseudohyphal-induced; regulated by Nrg1, Tup1; gene lacks intron (unlike S. cerevisiae PFY1); complements growth of S. cerevisiae srv2 mutant; nonessential	1.33908	1.33908	0.37252	-1.05017	0.95223	0.56392
orf19.2681	RBT7	Protein with similarity to RNase T2 enzymes; has putative secretion signal; expression is Tup1-repressed	1.33879	1.33879	0.12662	1.17314	1.17314	0.02644
orf19.48	RPM2	Mitochondrial RNase P subunit; roles in nuclear transcription, cytoplasmic and mitochondrial RNA processing, mitochondrial translation; virulence-group-correlated expression; likely essential (UAU1 method); rat catheter biofilm induced	1.33853	1.33853	0.24821	1.16421	1.16421	0.15288
orf19.1939	0	Ortholog of S. cerevisiae : YDR374C, C. glabrata CBS138 : CAGL0A02970g, C. dubliniensis CD36 : Cd36_51030, C. parapsilosis CDC317 : CPAR2_303320 and Candida tenuis NRRL Y-1498 : CANTEDRAFT_106457	1.33822	1.33822	0.22364	1.57075	1.57075	0.09447
orf19.3193	FCR3	bZIP transcription factor; ortholog of S. cerevisiae Yap3; partially complements fluconazole sensitivity of S. cerevisiae pdr1 pdr3; Hap43-induced; required for yeast cell adherence to silicone substrate; flow model biofilm repressed	1.33808	1.33808	0.12049	1.21417	1.21417	0.03079
orf19.446	0	Protein of unknown function; constitutive expression independent of MTL or white-opaque status; upregulated in a cyr1 mutant	1.33782	1.33782	0.2764	1.17791	1.17791	0.31217
orf19.4440	SEC34	Ortholog(s) have role in CVT pathway, ER to Golgi vesicle-mediated transport, macroautophagy, peroxisome degradation, retrograde transport, vesicle recycling within Golgi and Golgi transport complex, cell division site localization	1.33776	1.33776	0.11505	1.132	1.132	0.013
orf19.7417	TSA1	TSA/alkyl hydroperoxide peroxidase C (AhPC) family protein; similar to thiol-dependent peroxidases of oxidative stress signaling; antigenic; hyphal surface, nucleus; yeast-form nucleus, cytoplasm; biofilm, phagocytosis, peroxide induced	1.33767	1.33767	0.15128	1.02789	1.02789	0.46609
orf19.1976	TRX2	Similar to thioredoxins; not expected to be enzymatically active because it lacks a canonical thioredoxin active site (Trp-Cys-Gly-Pro-Cys); TRX1 encodes all of the cytoplasmic/nuclear thioredoxin function in C. albicans; Hap43p-induced	1.33753	1.33753	0.17553	1.72589	1.72589	0.04218
orf19.6185	0	Putative pseudouridine-5'-phosphate glycosidase; overlaps orf19.6186 and orf19.6187; Spider biofilm repressed	1.33696	1.33696	0.00126	-1.09845	0.91037	0.51201
orf19.7457	0	Protein with Mob2p-dependent hyphal regulation	1.33669	1.33669	0.16483	1.35171	1.35171	0.01315
orf19.7091	0	Protein of unknown function; induced by nitric oxide; Spider biofilm repressed	1.33658	1.33658	0.72677	-1.23181	0.81181	0.42916
orf19.2939	0	Ortholog(s) have mitochondrion localization	1.33633	1.33633	0.12684	1.4572	1.4572	0.00783
orf19.1191	0	Ortholog(s) have ubiquitin-protein ligase activity and role in ER-associated ubiquitin-dependent protein catabolic process	1.33607	1.33607	0.18577	1.29259	1.29259	0.05105
orf19.4244	0	Ortholog of Candida albicans WO-1 : CAWG_04619	1.33545	1.33545	0.2998	1.48918	1.48918	0.08856
orf19.1124	0	Protein of unknown function; flow model biofilm induced; Spider biofilm induced	1.33504	1.33504	0.00464	1.20898	1.20898	0.42189
orf19.1500	0	Ortholog of C. dubliniensis CD36 : Cd36_16720, C. parapsilosis CDC317 : CPAR2_210210, Candida tenuis NRRL Y-1498 : CANTEDRAFT_128446 and Debaryomyces hansenii CBS767 : DEHA2B04092g	1.33435	1.33435	0.12749	-1.00751	0.99254	0.86357
orf19.4624	HRT2	Protein described as having a role in Ty3 transposition; repressed in hyphae; stationary phase enriched protein; rat catheter and Spider biofilm repressed	1.33386	1.33386	0.14876	1.23345	1.23345	0.4881
orf19.2046	POT1-2	Putative peroxisomal 3-ketoacyl CoA thiolase; Hap43-repressed	1.33379	1.33379	0.05009	1.12037	1.12037	0.24944
orf19.3476	HRR25	Predicted protein serine/threonine kinase; Spider biofilm induced	1.33355	1.33355	0.21655	1.16019	1.16019	0.61558
orf19.1938	0	Ortholog of S.pombe SPCC825.05c; a predicted splicing coactivator; transcription repressed in azole-resistant strain overexpressing CDR1 and CDR2; induced by benomyl treatment	1.33331	1.33331	0.45829	1.34075	1.34075	0.00818
orf19.2176	IFM3	Protein with a 2-hydroxyacid dehydrogenase catalytic domain; Hap43-repressed; Plc1-regulated; overlaps orf19.2177	1.33237	1.33237	0.22148	1.48405	1.48405	0.13752
orf19.978	BDF1	Bromodomain transcription factor; repressed upon adherence to polystyrene; reduced mRNA abundance detected in null mutant; macrophage/pseudohyphal-repressed; possibly essential, disruptants not obtained by UAU1 method	1.33185	1.33185	0.15855	-1.02155	0.97891	0.95054
orf19.5502	0	Ortholog of C. dubliniensis CD36 : Cd36_73420, Debaryomyces hansenii CBS767 : DEHA2A05456g, Pichia stipitis Pignal : PICST_30999 and Candida guilliermondii ATCC 6260 : PGUG_00155	1.33165	1.33165	0.08429	1.93946	1.93946	0.00441
orf19.2262	0	Protein similar to quinone oxidoreductases; induced by benomyl treatment, nitric oxide; oxidative stress-induced via Cap1; stationary-phase enriched protein; Spider biofilm induced	1.33163	1.33163	0.05044	1.91115	1.91115	0.00788
orf19.1464	BMT5	Putative beta-mannosyltransferase involved in beta-1,2-mannosylation of phospholipomannan; 9-member family includes Bmt1, Bmt2, Bmt3, and Bmtp with roles in mannosylation of cell wall phosphopeptidomannan; Spider biofilm induced	1.3311	1.3311	0.37143	1.13129	1.13129	0.21068
orf19.6848	VPS16	Protein similar to S. cerevisiae Vps16p, which is involved in protein-vacuolar targeting; likely to be essential for growth, based on insertional mutagenesis; downregulated in biofilm or in azole-resistant strain that overexpresses MDR1	1.33089	1.33089	0.17684	1.17496	1.17496	0.0916
orf19.5380	LYS144	Zn(II)2Cys6 transcription factor; has similarity to S. cerevisiae Lys14, involved in the regulation of lysine biosynthesis genes	1.33067	1.33067	0.12646	1.10865	1.10865	0.13909
orf19.5861	KRE9	Protein of beta-1,6-glucan biosynthesis; required for serum-induced hyphal growth; required for efficient utilization of galactose and for growth on glucose; similar to S. cerevisiae Kre9p and Knh1p; O-glycosylated by Pmt1p	1.33065	1.33065	0.19628	-1.05343	0.94928	0.83062
orf19.3618	YWP1	Secreted yeast wall protein; possible role in dispersal in host; mutation increases adhesion and biofilm formation; propeptide; growth phase, phosphate, Ssk1/Ssn6/Efg1/Efh1/Hap43 regulated; mRNA binds She3; flow and Spider biofilm repressed	1.33059	1.33059	0.43095	1.29681	1.29681	0.23891
orf19.344	0	Protein of unknown function; upregulated by fluphenazine treatment or in an azole-resistant strain that overexpresses CDR1 and CDR2; transcript possibly regulated by Tac1	1.33014	1.33014	0.16426	1.4589	1.4589	0.00584
orf19.5171	PMT1	Protein mannosyltransferase; required for virulence in mice and for adhesion to epithelial cells; role in hyphal growth and drug sensitivity; Als1, Sec20, Kre9, Pir1 are substrates; 1 of 5 PMT family members	1.32957	1.32957	0.04778	1.14556	1.14556	0.11514
orf19.392	0	Ortholog(s) have role in mitochondrial respiratory chain complex III assembly and integral to mitochondrial membrane localization	1.32898	1.32898	0.11698	1.61695	1.61695	0.20095
orf19.4221	ORC4	Phosphorylated protein similar to S. cerevisiae Orc4, subunit of the origin recognition complex (ORC); induced by alpha pheromone in SpiderM medium	1.3289	1.3289	0.37773	1.1522	1.1522	0.01128
orf19.4099	ECM17	Putative sulfite reductase beta subunit; role in cell wall biogenesis; regulated by Tsa1/Tsa1B in H2O2 stress; Gcn4-regulated; Tbf1-activated; Hap43-repressed; Spider, flow, F-12/CO2 model biofilm induced	1.32846	1.32846	0.2319	1.13188	1.13188	0.86204
orf19.876	PGA33	Putative GPI-anchored protein of unknown function; Spider biofilm repressed	1.32802	1.32802	0.63223	1.41701	1.41701	0.01333
orf19.4538	0	Ortholog(s) have mRNA binding, protein heterodimerization activity, role in mRNA cleavage, mRNA polyadenylation and U2 snRNP, mRNA cleavage factor complex localization	1.32793	1.32793	0.02956	1.09166	1.09166	0.05141
orf19.5535	0	Predicted membrane transporter, member of the anion:cation symporter (ACS) family, major facilitator superfamily (MFS)	1.32793	1.32793	0.07393	1.16292	1.16292	0.19643
orf19.5022	0	Ortholog(s) have inorganic cation transmembrane transporter activity and role in cellular cobalt ion homeostasis, cellular manganese ion homeostasis, cobalt ion transport, manganese ion transport	1.32792	1.32792	0.02083	1.13169	1.13169	0.08114
orf19.4337	0	Predicted membrane transporter; monocarboxylate porter (MCP) family, major facilitator superfamily (MFS); Spider biofilm induced; rat catheter biofilm repressed	1.32769	1.32769	0.00646	1.58145	1.58145	0.01283
orf19.4531	0	Putative PDR-subfamily ABC transporter; Spider biofilm induced	1.32753	1.32753	0.03109	1.21578	1.21578	0.16956
orf19.1777	0	Ortholog(s) have ubiquitin-specific protease activity, role in endocytosis, protein deubiquitination and cell division site, cytosol, nucleus, peroxisome, transport vesicle localization	1.3275	1.3275	0.07515	1.18596	1.18596	0.21017
orf19.903	GPM1	Phosphoglycerate mutase; surface protein that binds host complement Factor H and FHL-1; antigenic; fluconazole, or amino acid starvation (3-AT) induced, farnesol-repressed; Hap43, flow model biofilm induced; Spider biofilm repressed	1.32743	1.32743	0.64324	1.18053	1.18053	0.24232
orf19.5325	KIN3	Protein similar to S. cerevisiae Kin3p; induced under Cdc5p depletion; shows Mob2p-dependent hyphal regulation; mutants are hypersensitive to caspofungin	1.32723	1.32723	0.09123	1.46465	1.46465	0.00629
orf19.5383	PMA1	Plasma membrane H(+)-ATPase; highly expressed, comprises 20-40% of total plasma membrane protein; levels increase at stationary phase transition; fluconazole induced; caspofungin repressed; upregulated in RHE model; Spider biofilm repressed	1.32722	1.32722	0.32318	-1.11908	0.89359	0.68153
orf19.3073	0	Protein of unknown function	1.32658	1.32658	0.03632	-1.13982	0.87733	0.99383
orf19.3934	CAR1	Arginase; arginine catabolism; transcript regulated by Nrg1, Mig1, Tup1; colony morphology-related regulation by Ssn6; alkaline induced; protein decreased in stationary phase; sumoylation target; flow model biofilm induced	1.32643	1.32643	0.04147	1.56389	1.56389	0.0498
orf19.3058	COQ6	Ortholog(s) have role in ubiquinone biosynthetic process and mitochondrial inner membrane localization	1.32611	1.32611	0.02119	1.47755	1.47755	0.00594
orf19.7205	DUR7	Putative urea transporter; fungal-specific (no human or murine homolog)	1.32601	1.32601	0.13653	1.2972	1.2972	0.0705
orf19.3919.1	0	Putative adhesin-like protein	1.32571	1.32571	0.097	-1.01724	0.98305	0.6225
orf19.2660	EAF3	Subunit of the NuA4 histone acetyltransferase complex; rat catheter and Spider biofilm induced	1.32519	1.32519	0.01773	1.27812	1.27812	0.00854
orf19.4593	RGA2	Putative GTPase-activating protein (GAP) for Rho-type GTPase Cdc42; involved in cell signaling pathways controlling cell polarity; induced by low-level peroxide stress; flow model biofilm induced	1.32517	1.32517	0.51334	1.15503	1.15503	0.03935
orf19.2213	0	Ortholog(s) have cytoplasm, nucleus localization	1.32271	1.32271	0.14036	1.10585	1.10585	0.12996
orf19.6465	0	Ortholog of C. dubliniensis CD36 : Cd36_83910, Candida tropicalis MYA-3404 : CTRG_05087 and Candida albicans WO-1 : CAWG_00654	1.32223	1.32223	0.09622	-1.12583	0.88823	0.94631
orf19.4335	TNA1	Putative nicotinic acid transporter; detected at germ tube plasma membrane by mass spectrometry; transcript induced upon phagocytosis by macrophage; rat catheter biofilm induced	1.32189	1.32189	0.01394	1.27858	1.27858	0.01703
orf19.866	RAD32	Protein similar to S. cerevisiae protein with role in nucleotide excision repair; down-regulation associated with azole resistance; Hap43p-repressed gene	1.32177	1.32177	0.0756	1.13421	1.13421	0.0326
orf19.5172	LIP9	Secreted lipase, member of a lipase gene family whose members are expressed differentially in response to carbon source and during infection; may have a role in nutrition and/or in creating an acidic microenvironment	1.32107	1.32107	0.11031	1.41069	1.41069	0.04404
orf19.2112	0	snRNP U5 splicing factor component; involved in positioning the 3' splice site during the 2nd catalytic step of splicing; Spider biofilm induced	1.32099	1.32099	0.50507	1.13239	1.13239	0.01605
orf19.5294	PDB1	Putative pyruvate dehydrogenase; fluconazole-induced; protein level decreases in stationary phase cultures; Spider biofilm repressed	1.32051	1.32051	0.26338	1.70188	1.70188	0.20267
orf19.6079	0	Predicted ORF in retrotransposon Tca8 with similarity to the Gag region encoding nucleocapsid-like protein; repressed by ciclopirox olamine; filament induced; regulated by Rfg1, Tup1; overlaps orf19.6078.1	1.32047	1.32047	0.03719	-1.09588	0.91251	0.40998
orf19.681	HAP43	CCAAT-binding factor-dependent transcription factor; repressor; also called CAP2; required for low iron response; similar to bZIP transcription factor AP-1; repressed by Sfu1; ciclopirox olamine induced; rat catheter, Spider biofilm induced	1.32017	1.32017	0.05796	1.02707	1.02707	0.46581
orf19.1234	FGR6-10	Protein lacking an ortholog in S. cerevisiae; member of a family encoded by FGR6-related genes in the RB2 repeat sequence; transposon mutation affects filamentous growth	1.31997	1.31997	0.19493	1.08744	1.08744	0.30429
orf19.4376	0	Protein of unknown function; Spider biofilm induced	1.31884	1.31884	0.28947	1.41077	1.41077	0.008
orf19.3139	0	Putative NADP-dependent oxidoreductase; Hap43-repressed; induced by benomyl treatment; oxidative stress-induced via Cap1; rat catheter biofilm repressed	1.31755	1.31755	0.19024	1.21505	1.21505	0.06921
orf19.5553	0	Ortholog(s) have methionine-R-sulfoxide reductase activity, role in cellular response to oxidative stress and cytoplasm, nucleus localization	1.3174	1.3174	0.00854	1.52167	1.52167	0.04796
orf19.2253	0	Protein of unknown function; expression regulated by white-opaque switch; repressed by alpha pheromone in SpiderM medium; Spider biofilm induced	1.31688	1.31688	0.05639	1.2246	1.2246	0.11624
orf19.316	SEC13	Putative protein transport factor; antigenic during murine systemic infection; macrophage-downregulated protein; protein level decreases in stationary phase cultures; Spider biofilm repressed	1.31674	1.31674	0.23999	1.22341	1.22341	0.03165
orf19.6515	HSP90	Essential chaperone, regulates several signal transduction pathways and temperature-induced morphogenesis; activated by heat shock, stress; localizes to surface of hyphae, not yeast cells; mediates echinocandin and biofilm azole resistance	1.31666	1.31666	0.06753	-1.09511	0.91315	0.94771
orf19.3759	0	Putative elongator complex subunit; for modification of wobble nucleosides in tRNA; Spider biofilm induced	1.31653	1.31653	0.18995	1.28107	1.28107	0.03519
orf19.7112	FRP2	Putative ferric reductase; alkaline induced by Rim101; fluconazole-downregulated; upregulated in the presence of human neutrophils; possibly adherence-induced; regulated by Sef1, Sfu1, and Hap43	1.31574	1.31574	0.87685	1.10876	1.10876	0.00455
orf19.3038	TPS2	Trehalose-6-phosphate (Tre6P) phosphatase; mutant heat sensitive, accumulates Tre6P, decreased mouse virulence; possible drug target; 2 conserved phospohydrolase motifs; no mammalian homolog; Hap43-repressed; flow model biofilm induced	1.31553	1.31553	0.37365	-1.1472	0.87168	0.57377
orf19.6134	0	Ortholog(s) have role in ER-dependent peroxisome organization, retrograde vesicle-mediated transport, Golgi to ER and Dsl1p complex, endoplasmic reticulum membrane, nuclear envelope, peroxisome localization	1.3154	1.3154	0.00885	1.07054	1.07054	0.24597
orf19.2633	HGT14	Putative MFS glucose transporter; 20 member C. albicans glucose transporter family; 12 probable membrane-spanning segments; expressed in rich medium with 2% glucose; rat catheter and flow model biofilm induced	1.31532	1.31532	0.30203	1.23416	1.23416	0.0362
orf19.5203	0	Protein of unknown function; Hap43-induced gene	1.31531	1.31531	0.04715	1.19887	1.19887	0.15974
orf19.2652	TEF4	Putative translation elongation factor; genes encoding ribosomal subunits, translation factors, and tRNA synthetases are downregulated upon phagocytosis by murine macrophage	1.3152	1.3152	0.20594	1.30447	1.30447	0.04908
orf19.7195	RAD6	Functional ortholog of S. cerevisiae Rad6; negative regulator of hyphal growth; required for wild-type UV resistance; acts in pathway with Efg1; ; transcript is UV-induced, slightly repressed during hyphal growth; gene has two introns	1.31476	1.31476	0.0292	1.55547	1.55547	0.01212
orf19.675.1	0	Putative adhesin-like protein	1.31459	1.31459	0.25961	1.13676	1.13676	0.04836
orf19.5404	#N/A	#N/A	1.31423	1.31423	0.03422	1.03972	1.03972	0.40785
orf19.3757	ATP20	Putative mitochondrial ATP synthase; shows colony morphology-related gene regulation by Ssn6p; flucytosine induced; caspofungin repressed; macrophage/pseudohyphal-induced	1.31408	1.31408	0.11987	1.7479	1.7479	0.10807
orf19.5282	0	Protein of unknown function; Hap43-repressed gene; mRNA binds to She3; repressed in hyphae; Efg1 and Efh1 regulated; 5'-UTR intron; induced by Mnl1 under weak acid stress; rat catheter biofilm induced	1.31374	1.31374	0.04578	1.12147	1.12147	0.28963
orf19.6269	0	Ortholog of C. dubliniensis CD36 : Cd36_05990, Candida tenuis NRRL Y-1498 : CANTEDRAFT_91852, Debaryomyces hansenii CBS767 : DEHA2G15356g and Pichia stipitis Pignal : PICST_87044	1.31346	1.31346	0.15692	1.39696	1.39696	0.07062
orf19.3419	MAE1	Malic enzyme, mitochondrial; transcription regulated by Mig1, Tup1; colony morphology-related gene regulation by Ssn6; Hap43-repressed; Spider biofilm repressed	1.31308	1.31308	0.28829	-1.02245	0.97804	0.60021
orf19.5268	MED10	RNA polymerase II mediator complex subunit; possibly an essential gene, disruptants not obtained by UAU1 method	1.31268	1.31268	0.22638	1.1956	1.1956	0.14528
orf19.6838	0	Putative protein of unknown function, transcript upregulated in clinical isolates from HIV+ patients with oral candidiasis; Spider biofilm induced	1.31242	1.31242	0.62891	1.18762	1.18762	0.15955
orf19.2129	0	Ortholog of S. cerevisiae Spo71; a meiosis-specific protein required for spore wall formation during sporulation in S. cerevisiae; possibly an essential gene, disruptants not obtained by UAU1 method	1.31232	1.31232	0.06056	1.03667	1.03667	0.36651
orf19.5335	SGS1	RecQ-related DNA helicase; Bloom's syndrome-related gene; haploinsufficient for wild-type lifespan; upregulated in farnesol treated biofilm	1.3117	1.3117	0.14151	-1.09142	0.91624	0.58114
orf19.6146	CLG1	Putative cyclin-like protein; transcription is regulated upon yeast-hyphal switch	1.31162	1.31162	0.34508	1.27245	1.27245	0.13012
orf19.4316	0	Trimethyllysine dioxygenase, the first enzyme in the carnitine biosynthesis pathway; hypha-induced expression, regulated by Cyr1, Ras1, Efg1; rat catheter biofilm repressed	1.31149	1.31149	0.01858	1.60185	1.60185	0.01365
orf19.4055	0	Protein similar to S. cerevisiae Ybr075wp; transposon mutation affects filamentous growth; clade-associated gene expression	1.31124	1.31124	0.28238	1.05634	1.05634	0.45839
orf19.6800	POS5	Protein similar to S. cerevisiae Pos5p, a mitochondrial NADH kinase involved in the oxidative stress response; planktonic growth-induced gene; likely to be essential for growth, based on an insertional mutagenesis strategy	1.31121	1.31121	0.01208	1.42805	1.42805	0.03699
orf19.5851	STE13	Putative pheromone-processing dipeptidyl aminopeptidase; possible Kex2 substrate; transposon mutation affects filamentous growth; induced by low nitrogen, germ tube formation; flow model biofilm repressed	1.31112	1.31112	0.80112	1.26282	1.26282	0.06962
orf19.4882	0	TFIIE small subunit; involved in RNA polymerase II transcription initiation; Spider biofilm induced	1.31052	1.31052	0.07548	1.12103	1.12103	0.08068
orf19.6170	0	Ortholog(s) have microtubule binding, protein heterodimerization activity, protein homodimerization activity	1.31016	1.31016	0.01509	1.17368	1.17368	0.04343
orf19.4372	0	Predicted transmembrane transporter; rat catheter and Spider biofilm induced	1.30989	1.30989	0.52634	1.19961	1.19961	0.1392
orf19.6139	FRE7	Copper-regulated cupric reductase; repressed by ciclopirox olamine or 17-beta-estradiol; induced by alkaline conditions or interaction with macrophage; Spider biofilm induced	1.30969	1.30969	0.09929	1.23787	1.23787	0.12635
orf19.7175	HLJ1	Putative HSP40 co-chaperone; repressed during the mating process	1.30951	1.30951	0.02732	1.28687	1.28687	0.00217
orf19.1806	0	Ortholog of C. dubliniensis CD36 : Cd36_30340, C. parapsilosis CDC317 : CPAR2_203900, Candida tenuis NRRL Y-1498 : CANTEDRAFT_113094 and Debaryomyces hansenii CBS767 : DEHA2G22374g	1.30931	1.30931	0.07305	-1.03026	0.97063	0.68537
orf19.726	PPZ1	Protein phosphatase Z; type 1 family serine/threonine specific protein phosphatase involved in cation homeostasis and cell wall integrity	1.30899	1.30899	0.43342	1.39319	1.39319	0.01784
orf19.7059	0	Ortholog(s) have endoribonuclease activity, role in nuclear mRNA surveillance of mRNP export, transcription, DNA-templated and cytoplasm, nucleus localization	1.30877	1.30877	0.02111	1.45443	1.45443	0.03201
orf19.4872	0	Protein of unknown function; induced by Mnl1 under weak acid stress; Hap43-induced; mutant is viable	1.30863	1.30863	0.02695	-1.11222	0.8991	0.23731
orf19.6059	TTR1	Putative glutaredoxin; described as a glutathione reductase; induced by human neutrophils and benomyl treatment; alkaline repressed; regulated by Gcn2 and Gcn4; required for virulence in mouse model; Spider biofilm induced	1.30862	1.30862	0.32391	1.36314	1.36314	0.00127
orf19.292	0	Ortholog of C. parapsilosis CDC317 : CPAR2_102390, C. dubliniensis CD36 : Cd36_82960, Candida tenuis NRRL Y-1498 : CANTEDRAFT_133198 and Lodderomyces elongisporus NRLL YB-4239 : LELG_02116	1.30822	1.30822	0.9046	1.06823	1.06823	0.23045
orf19.7316	0	Putative phytanoyl-CoA dioxygenase family protein; mutation confers hypersensitivity to 5-fluorocytosine (5-FC), 5-fluorouracil (5-FU), and tubercidin (7-deazaadenosine); induced by nitric oxide	1.30809	1.30809	0.38358	1.21721	1.21721	0.04252
orf19.2308	0	Putative 6-phosphofructo-2-kinase; catalyzes synthesis of fructose-2,6-bisphosphate; Hap43-repressed; flow model, rat catheter and Spider biofilm induced	1.30781	1.30781	0.29568	-1.44842	0.69041	0.01964
orf19.707	APG7	Ortholog(s) have APG12 activating enzyme activity, APG8 activating enzyme activity	1.30768	1.30768	0.06971	1.42927	1.42927	0.01398
orf19.7519	0	Ortholog of C. dubliniensis CD36 : Cd36_25180, C. parapsilosis CDC317 : CPAR2_800030, Candida tenuis NRRL Y-1498 : CANTEDRAFT_125790 and Debaryomyces hansenii CBS767 : DEHA2E18260g	1.30753	1.30753	0.03659	1.11413	1.11413	0.0914
orf19.6984	0	Ortholog of C. dubliniensis CD36 : Cd36_85460, C. parapsilosis CDC317 : CPAR2_405760, Candida tenuis NRRL Y-1498 : CANTEDRAFT_116052 and Debaryomyces hansenii CBS767 : DEHA2D16940g	1.30745	1.30745	0.0293	1.18918	1.18918	0.03678
orf19.3606	0	Ortholog of S. cereviae Sna4 vacuolar outer membrane protein that plays a role in sensitivity to NA+; induced by Mnl1 under weak acid stress	1.30595	1.30595	0.03392	1.24315	1.24315	0.11586
orf19.6411	0	Protein similar to S. cerevisiae Vac14p; a protein involved in regulated synthesis of PtdIns(3,5)P(2); transposon mutation affects filamentous growth	1.30541	1.30541	0.14288	1.00048	1.00048	0.77103
orf19.4520	0	Putative gluconokinase; rat catheter biofilm induced	1.3053	1.3053	0.08037	1.4315	1.4315	0.07737
orf19.5992	WOR2	Zn(II)2Cys6 transcription factor; regulator of white-opaque switching; required for maintenance of opaque state; Hap43-induced	1.30526	1.30526	0.15886	1.02127	1.02127	0.3953
orf19.2810	AAP1	Putative amino acid permease; fungal-specific; possibly essential, disruptants not obtained by UAU1 method; Spider biofilm induced	1.30417	1.30417	0.07198	1.22261	1.22261	0.00853
orf19.5447	HGT19	Putative MFS glucose/myo-inositol transporter; 20 member family; 12 transmembrane segments, extended N terminus; expressed in rich medium; Hap43, phagocytosis, rat catheter, Spider and flow model biofilm induced	1.30356	1.30356	0.25677	1.56915	1.56915	0.09059
orf19.4461	0	Ortholog of Candida albicans WO-1 : CAWG_01005	1.30255	1.30255	0.05722
orf19.986	GLY1	L-threonine aldolase; complements glycine auxotrophy of S. cerevisiae shm1 shm2 gly1-1 triple mutant; macrophage/pseudohyphal-induced; the GLY1 locus has an RFLP and is triploid in strain SGY269; flow model biofilm induced	1.30252	1.30252	0.55636	1.21724	1.21724	0.06562
orf19.1890	0	Ortholog(s) have role in medium-chain fatty acid biosynthetic process	1.30213	1.30213	0.14257	1.15295	1.15295	0.19294
orf19.4919	0	Has domain(s) with predicted DNA binding, nucleic acid binding activity	1.30209	1.30209	0.36009	1.16134	1.16134	0.10812
orf19.2812	0	Protein of unknown function; Spider biofilm induced	1.3014	1.3014	0.18825	-1.00076	0.99924	0.51974
orf19.6944	PHB1	Putative prohibitin; identified in detergent-resistant membrane fraction (possible lipid raft component); predicted N-terminal acetylation; Hap43p-repressed gene	1.30086	1.30086	0.1696	1.49087	1.49087	0.0178
orf19.1496	0	Putative transcription factor with zinc finger DNA-binding motif; Hap43p-repressed gene	1.30046	1.30046	0.00477	1.23532	1.23532	0.11216
orf19.4914	0	Ortholog(s) have role in cellular response to DNA damage stimulus	1.3004	1.3004	0.24731	1.34458	1.34458	0.00447
orf19.698	0	Integral ER membrane protein; predicted role in maintenance of ER zinc homeostasis; Spider biofilm induced	1.30022	1.30022	0.11361	-1.10028	0.90886	0.26834
orf19.656	DPP1	Putative diacylglycerol pyrophosphate phosphatase of diacylglycerol production for phospholipid biosynthesis; downregulation correlates with clinical development of fluconazole resistance	1.30007	1.30007	0.00042	1.21676	1.21676	0.00732
orf19.1063	0	Ortholog(s) have dolichyl-phosphate-mannose-glycolipid alpha-mannosyltransferase activity, role in GPI anchor biosynthetic process and integral to endoplasmic reticulum membrane, mannosyltransferase complex, mitochondrion localization	1.29998	1.29998	0.16215	1.23472	1.23472	0.02931
orf19.5201.1	0	Has domain(s) with predicted enzyme inhibitor activity, role in negative regulation of nucleotide metabolic process and mitochondrion localization	1.29991	1.29991	0.32417	1.34951	1.34951	0.17258
orf19.1182	0	Ortholog(s) have SNAP receptor activity, phosphatidylinositol-3-phosphate binding activity and role in piecemeal microautophagy of nucleus, vacuole fusion, non-autophagic, vesicle fusion	1.29967	1.29967	0.18009	1.47369	1.47369	0.04093
orf19.5927	RPS15	Putative ribosomal protein; macrophage/pseudohyphal-induced after 16 h; repressed upon phagocytosis by murine macrophage; Spider biofilm repressed	1.2996	1.2996	0.15399	-1.03925	0.96223	0.34999
orf19.6169	ATO1	Putative fungal-specific transmembrane protein; induced by Rgt1; Spider biofilm induced	1.29891	1.29891	0.22162	1.0371	1.0371	0.68124
orf19.2605	PRK1	Putative protein serine/threonine kinase; mutants sensitive to growth on hydrogen peroxide medium	1.2989	1.2989	0.09606	1.02673	1.02673	0.4441
orf19.2036	0	Predicted dihydrodiol dehydrogenase; ortholog of S. pombe SPAC513.06c; flow model and rat catheter biofilm repressed	1.29844	1.29844	0.0061	1.34173	1.34173	0.13215
orf19.2501	FLC1	Protein involved in heme uptake; putative FAD transporter, similar to S. cerevisiae Flc1; regulated by iron; macrophage-induced; mutant defective in filamentous growth; Spider biofilm induced	1.298	1.298	0.27166	-1.02736	0.97336	0.27223
orf19.697	0	Ortholog(s) have mitochondrial outer membrane localization	1.29743	1.29743	0.08644	1.56347	1.56347	0.00904
orf19.5224	PKH2	Putative serine/threonine protein kinase; predicted role in sphingolipid-mediated signaling pathway that controls endocytosis; mRNA binds She3 and is localized to hyphal tips	1.29725	1.29725	0.30457	1.23083	1.23083	0.137
orf19.6684	PNC1	Putative nicotinamidase, involved in NAD salvage pathway; decreased transcription is observed in an azole-resistant strain that overexpresses MDR1	1.29614	1.29614	0.21797	1.29928	1.29928	0.17265
orf19.7357	0	Ortholog(s) have role in coenzyme A biosynthetic process and cytosol, nucleus localization	1.29533	1.29533	0.17539	1.24812	1.24812	0.0044
orf19.6306	0	Trimethylaminobutyraldehyde dehydrogenase, the third enzyme of the carnitine biosynthesis pathway	1.29501	1.29501	0.19947	1.52851	1.52851	0.00053
orf19.5045	PTP2	Predicted protein tyrosine phosphatase; involved in regulation of MAP kinase Hog1 activity; induced by Mnl1 under weak acid stress; rat catheter and Spider biofilm induced	1.29354	1.29354	0.18209	1.0019	1.0019	0.75445
orf19.4991	MPT5	Putative RNA-binding protein; Hap43p-repressed gene; protein induced during the mating process	1.29297	1.29297	0.2639	1.08791	1.08791	0.64805
orf19.764	0	Ortholog(s) have clathrin-coated vesicle, cytoplasm localization	1.29289	1.29289	0.06137	-1.12639	0.8878	0.33107
orf19.7341	0	Protein of unknown function; flow model biofilm induced; ketoconazole-repressed	1.29287	1.29287	0.004	1.05618	1.05618	0.10226
orf19.4947	0	Mitochondrial membrane protein of unknown function; Spider biofilm induced	1.29282	1.29282	0.4238	1.18869	1.18869	0.09754
orf19.6641	0	Ortholog of Candida albicans WO-1 : CAWG_01892	1.29253	1.29253	0.09841	1.06957	1.06957	0.07925
orf19.1148	0	Ortholog of C. dubliniensis CD36 : Cd36_11020 and Candida albicans WO-1 : CAWG_00266	1.29237	1.29237	0.22645	1.03164	1.03164	0.29907
orf19.4869	SFU1	GATA-type transcription factor; regulator of iron-responsive genes; represses iron utilization genes if iron is present; Hap43-repressed; promotes gastrointestinal commensalism in mice; Spider biofilm induced	1.29219	1.29219	0.95716	-1.01772	0.98259	0.90245
orf19.5418	0	Ortholog(s) have role in ER to Golgi vesicle-mediated transport and endoplasmic reticulum localization	1.29183	1.29183	0.00096	1.08172	1.08172	0.72879
orf19.1036	MNS1	Alpha-1,2-mannosidase; processes Man9GlcNAc2 to Man8GlcNAc2 isomer B; member of ER localized glycosyl hydrolase family 47; ER form is converted by Kex2 to cytosolic form; flow model biofilm repressed	1.29165	1.29165	0.46325	1.04417	1.04417	0.92517
orf19.4893	0	Ortholog of C. dubliniensis CD36 : Cd36_09630, C. parapsilosis CDC317 : CPAR2_805080, Candida tenuis NRRL Y-1498 : CANTEDRAFT_136811 and Debaryomyces hansenii CBS767 : DEHA2B12364g	1.2905	1.2905	0.02846	1.46562	1.46562	0.13824
orf19.7368	0	Ortholog(s) have mRNA binding, poly(U) RNA binding activity and role in nuclear-transcribed mRNA catabolic process, nonsense-mediated decay, regulation of mRNA stability, stress granule assembly	1.29043	1.29043	0.05851	1.19517	1.19517	0.0077
orf19.4382	0	Ortholog(s) have role in retrograde vesicle-mediated transport, Golgi to ER and COPI vesicle coat, cytosol, nucleus localization	1.29036	1.29036	0.63567	-1.00624	0.9938	0.6107
orf19.5585	SAP5	Secreted aspartyl proteinase; sap4,5,6 triple null defective in utilization of protein as N source; virulence role effected by URA3; expressed during infection; mRNA localized to hyphal tip via She3; rat catheter and Spider biofilm induced	1.29025	1.29025	0.08053	1.70436	1.70436	0.31748
orf19.2030	0	Plasma membrane-associated protein; induced in cyr1 or ras1 mutant; induced by hypoxia, ketoconazole and during growth in the mouse cecum; induced in oralpharyngeal candidasis; Spider biofilm induced	1.29015	1.29015	0.06484	1.3515	1.3515	0.03184
orf19.3931	SFC1	Putative succinate-fumarate transporter; involved in repression of growth on sorbose; alkaline induced; rat catheter biofilm induced; Spider biofilm induced	1.29011	1.29011	0.12139	1.83427	1.83427	0.0323
orf19.953.1	COF1	Putative cofilin; macrophage-induced protein; protein present in exponential and stationary-phase yeast cells, but higher amounts in stationary phase	1.28999	1.28999	0.32018	-1.16931	0.85521	0.27033
orf19.6068	SVF1	Putative survival factor; stationary phase enriched protein; fluconazole-induced; regulated by Gcn4p; repressed in response to amino acid starvation (3-AT treatment); fungal-specific (no human or murine homolog)	1.28999	1.28999	0.28414	1.15085	1.15085	0.18176
orf19.2412	0	Ortholog(s) have role in late endosome to vacuole transport via multivesicular body sorting pathway and Golgi apparatus, Vps55/Vps68 complex, fungal-type vacuole membrane, late endosome localization	1.28894	1.28894	0.09526	1.13495	1.13495	0.10044
orf19.6667	0	Predicted histone deacetylase activity; Spider biofilm induced	1.28892	1.28892	0.17775	1.50404	1.50404	0.02054
orf19.6551.1	STE18	Protein similar to S. cerevisiae Ste18p; expressed in opaque or white MTLa/MTLa or MTLalpha/MTLalpha, but not MTLa/MTLalpha cells; MTLa1p, MTLalpha2p bind promoter region	1.28856	1.28856	0.68458	1.13978	1.13978	0.11278
orf19.1751	SPT23	Protein involved in regulation of unsaturated fatty acid biosynthesis; controls the expression of the Ole1p delta-9-fatty acid desaturase	1.28837	1.28837	0.29322	1.40361	1.40361	0.0335
orf19.1596	FGR28	Protein lacking an ortholog in S. cerevisiae; transposon mutation affects filamentous growth; possibly an essential gene, disruptants not obtained by UAU1 method	1.28821	1.28821	0.05169	-1.04903	0.95326	0.95249
orf19.2959.1	0	Gene induced by hypoxia and ketoconazole; oral infection upregulated; mutants have reduced capacity to damage oral epithelial cells; Spider biofilm induced	1.2879	1.2879	0.42813	1.23974	1.23974	0.75435
orf19.487	SPT14	Putative DNA-binding transcription factor; predicted role in regulation of biogenesis of the cell wall; upregulated in biofilm; protein newly produced during adaptation to the serum	1.28784	1.28784	0.50125	1.29263	1.29263	0.07912
orf19.4923	0	Predicted membrane transporter; sugar porter (SP) family member, major facilitator superfamily; caspofungin induced; Spider biofilm induced	1.2875	1.2875	0.23117	1.09849	1.09849	0.13509
orf19.4450	ZCF23	Predicted Zn(II)2Cys6 transcription factor; ortholog of S. cerevisiae Gsm1; flow model biofilm induced	1.28675	1.28675	0.46898	1.2772	1.2772	0.07558
orf19.36	0	Component of the conserved oligomeric Golgi complex; predicted to mediate fusion of transport vesicles to Golgi compartments; clade-associated gene expression	1.286	1.286	0.09512	1.04848	1.04848	0.39187
orf19.1497	ZCF6	Putative transcription factor with zinc cluster DNA-binding motif	1.28592	1.28592	0.06211	1.1437	1.1437	0.18048
orf19.2084	CDH1	Protein involved in regulation of mitosis; similar to S. cerevisiae Cdh1, which is an APC/C component; transcriptionally induced by Mnl1 under weak acid stress	1.28574	1.28574	0.10505	1.12273	1.12273	0.00944
orf19.728	TSC11	Protein similar to S. cerevisiae Tsc11p which is involved in sphingolipid biosynthesis; transposon mutation affects filamentous growth	1.28568	1.28568	0.25481	1.27734	1.27734	0.05333
orf19.6691	0	Putative ember of the multi-drug and toxin extrusion (MATE) family of the multidrug/oligosaccharidyl-lipid/polysaccharide exporter superfamily; Spider biofilm induced	1.28531	1.28531	0.12186	1.58464	1.58464	0.01172
orf19.1259	0	Ortholog(s) have DNA binding, ubiquitin-protein ligase activity and role in histone catabolic process, histone ubiquitination, regulation of transcription from RNA polymerase II promoter in response to oxidative stress	1.28525	1.28525	0.26222	1.17854	1.17854	0.00599
orf19.4807	0	Ortholog(s) have inorganic diphosphatase activity, role in aerobic respiration and mitochondrion localization	1.2852	1.2852	0.03901	1.23237	1.23237	0.14142
orf19.4120	LAS1	Putative bud formation and morphogenesis protein; mutation confers hypersensitivity to 5-fluorocytosine (5-FC), 5-fluorouracil (5-FU); macrophage-induced; Spider biofilm induced	1.28492	1.28492	0.35273	-1.00664	0.9934	0.17518
orf19.6850	0	Putative transcription factor with C3HC4 zinc finger DNA-binding motif; mutants are viable	1.28473	1.28473	0.40609	1.43714	1.43714	0.0488
orf19.7050	NOP15	Nucleolar ribosome biogenesis factor; hyphal-induced expression; Hap43-induced; rat catheter biofilm induced	1.28427	1.28427	0.17475	1.05572	1.05572	0.94821
orf19.1887	0	Ortholog(s) have sterol esterase activity, role in sterol metabolic process and integral to membrane, lipid particle localization	1.28395	1.28395	0.0298	1.15826	1.15826	0.19516
orf19.4416	VPS13	Putative vacuolar protein sorting-associated protein; gene used for multilocus sequence typing	1.28309	1.28309	0.17031	-1.49367	0.66949	0.03902
orf19.3220	0	Putative rRNA processing protein; Spider biofilm induced	1.28296	1.28296	0.05148	1.31284	1.31284	0.00169
orf19.719	0	Ortholog(s) have ubiquitin-protein ligase activity	1.28293	1.28293	0.29347	1.0777	1.0777	0.1773
orf19.2064	0	Putative transcription factor with zinc finger DNA-binding motif	1.28276	1.28276	0.00892	1.23617	1.23617	0.27339
orf19.4931	0	Putative tRNA-Cys synthetase; induced by alpha pheromone in SpiderM medium; ribosomal subunits, translation factors, tRNA synthetases are downregulated upon phagocytosis by murine macrophage	1.28254	1.28254	0.92807	1.24602	1.24602	0.1629
orf19.1960	CLN3	G1 cyclin; depletion abolishes budding and causes hyphal growth defects; farnesol regulated, functional in S. cerevisiae; possibly essential (UAU1 method); other biofilm induced; Spider biofilm induced	1.28254	1.28254	0.39125	1.65742	1.65742	0.0478
orf19.7305	0	Ortholog of C. dubliniensis CD36 : Cd36_34510, Candida tropicalis MYA-3404 : CTRG_05938 and Candida albicans WO-1 : CAWG_02183	1.28227	1.28227	0.52994	1.16647	1.16647	0.16299
orf19.178	0	Ortholog of C. dubliniensis CD36 : Cd36_32460, C. parapsilosis CDC317 : CPAR2_205480, Candida tenuis NRRL Y-1498 : CANTEDRAFT_115156 and Debaryomyces hansenii CBS767 : DEHA2E22154g	1.28215	1.28215	0.19321	1.21125	1.21125	0.09901
orf19.4952	0	Protein of unknown function; flow model biofilm induced; Spider biofilm induced	1.28201	1.28201	0.21857	-1.23276	0.81119	0.5679
orf19.6376	PTC5	Mitochondrial protein phosphatase of the Type 2C-related family (serine/threonine-specific), involved in drug response and cadmium tolerance	1.28192	1.28192	0.24011	1.2887	1.2887	0.05495
orf19.5514	0	Ortholog of S. pombe SPCC550.08, an N-acetyltransferase; transcript induced during growth in the mouse cecum	1.28109	1.28109	0.47537	1.4243	1.4243	0.05176
orf19.17	SCP1	Putative cortical actin cytoskeleton protein; constitutive expression independent of MTL or white-opaque status	1.28036	1.28036	0.23205	1.30762	1.30762	0.00712
orf19.6579	0	Ortholog of C. dubliniensis CD36 : Cd36_71340, C. parapsilosis CDC317 : CPAR2_301350, Candida tenuis NRRL Y-1498 : CANTEDRAFT_114098 and Debaryomyces hansenii CBS767 : DEHA2D03432g	1.2801	1.2801	0.31395	1.44395	1.44395	0.02173
orf19.1911	PGA52	GPI-anchored cell surface protein of unknown function; Hap43p-repressed gene; fluconazole-induced; possibly an essential gene, disruptants not obtained by UAU1 method	1.28003	1.28003	0.14181	1.15222	1.15222	0.14694
orf19.771	LPG20	Aldo-keto reductase family protein; similar to aryl alcohol dehydrogenases; osmotic stress-induced, correlates with overexpression of MDR1 in fluconazole-resistant isolate; stationary phase enriched protein	1.27974	1.27974	0.26703	1.14243	1.14243	0.26032
orf19.843	0	Putative DNA repair exonuclease; fungal-specific (no human or murine homolog)	1.27947	1.27947	0.06062	1.24214	1.24214	0.02124
orf19.7359	CRZ1	Calcineurin-regulated C2H2 transcription factor; role in maintenance of membrane integrity, azole tolerance; not required for mouse virulence; repressed by low iron; regulates Ca++ influx during alkaline pH response; Spider biofilm induced	1.27945	1.27945	0.18935	-1.16511	0.85829	0.00959
orf19.4063	GPT1	GABA/polyamine transporter; 9 to 11 membrane spanning segments; complements GABA uptake defect of an S. cerevisiae uga4 put4 gap1 triple mutant; complements growth of an S. cerevisiae spe1 mutant under polyamine limitation	1.27868	1.27868	0.17589	1.04162	1.04162	0.60425
orf19.4330	0	Ortholog of C. dubliniensis CD36 : Cd36_52790, Candida tropicalis MYA-3404 : CTRG_05968 and Candida albicans WO-1 : CAWG_04684	1.27834	1.27834	0.12791	-1.20054	0.83296	0.10578
orf19.3445	HOC1	Protein with similarity to mannosyltransferases; similar to S. cerevisiae Hoc1p and C. albicans Och1p	1.27772	1.27772	0.00609	1.4963	1.4963	0.01992
orf19.5259	0	Ortholog of C. dubliniensis CD36 : Cd36_11290, C. parapsilosis CDC317 : CPAR2_805090, Pichia stipitis Pignal : PICST_28850 and Candida guilliermondii ATCC 6260 : PGUG_02709	1.27751	1.27751	0.18955	1.12861	1.12861	0.07418
orf19.284	0	Ortholog of C. dubliniensis CD36 : Cd36_82890, Debaryomyces hansenii CBS767 : DEHA2G01034g, Pichia stipitis Pignal : PICST_32242 and Candida guilliermondii ATCC 6260 : PGUG_04638	1.27737	1.27737	0.79871	-1.07232	0.93256	0.71256
orf19.27	0	Ortholog of C. dubliniensis CD36 : Cd36_20860, C. parapsilosis CDC317 : CPAR2_104250, Candida tenuis NRRL Y-1498 : CANTEDRAFT_115100 and Debaryomyces hansenii CBS767 : DEHA2E10450g	1.277	1.277	0.51943	1.27273	1.27273	0.18005
orf19.7644	0	Ortholog(s) have ubiquitin-protein ligase activity, role in anaphase-promoting complex-dependent proteasomal ubiquitin-dependent protein catabolic process, protein ubiquitination and anaphase-promoting complex localization	1.27687	1.27687	0.18469	1.07415	1.07415	0.55919
orf19.5751	ORM1	Putative endoplasmic reticulum membrane protein; Hap43p-repressed gene; mutation confers hypersensitivity to aureobasidin A	1.27648	1.27648	0.25761	1.4371	1.4371	0.25543
orf19.3878	0	Protein of unknown function; flow model biofilm induced	1.27624	1.27624	0.20992	1.16761	1.16761	0.22499
orf19.4937	CHS3	Major chitin synthase of yeast and hyphae; synthesizes short-chitin fibrils; Chs4-activated; transcript induced at yeast-hyphal transition; Chs1 and Chs2, but not Chs3, are inhibited by the protoberberine HWY-289; Spider biofilm induced	1.2762	1.2762	0.18991	1.22351	1.22351	0.07446
orf19.4659	0	Ortholog(s) have RNA binding activity, role in mRNA splicing, via spliceosome and U2 snRNP, U2-type prespliceosome localization	1.27611	1.27611	0.60556	-1.07038	0.93424	0.59499
orf19.1702	ARF3	Similar to but not orthologous to S. cerevisae Arf3; transcript filament induced; Tup1 regulated; rat catheter biofilm repressed (see Locus History Note for Assembly 19 correction)	1.27604	1.27604	0.30134	1.14371	1.14371	0.08245
orf19.5251	ZCF30	Predicted Zn(II)2Cys6 transcription factor; mutants are viable; repressed by fluphenazine; Spider biofilm induced	1.27601	1.27601	0.47479	1.08498	1.08498	0.11213
orf19.5505	HIS7	Putative imidazole glycerol phosphate synthase; histidine biosynthesis; no human/murine homolog; transcription induced by histidine starvation; regulated by Gcn2p and Gcn4p; higher protein level in stationary phase	1.27593	1.27593	0.2841	1.37923	1.37923	0.05513
orf19.4823	LIP6	Secreted lipase, member of family of lipase genes expressed differentially in response to carbon source and during infection; may have a role in nutrition and/or in creating an acidic microenvironment; induced on adherence to polystyrene	1.27532	1.27532	0.1392	1.12974	1.12974	0.38709
orf19.2774	LAB5	Ortholog(s) have role in protein lipoylation and mitochondrion localization	1.2752	1.2752	0.23988	1.22319	1.22319	0.11611
orf19.4358	0	Putative protein of unknown function; Hap43p-repressed gene; S. cerevisiae ortholog YDL157C localizes to mitochondria	1.27491	1.27491	0.10748	1.30372	1.30372	0.39232
orf19.1077	ATM1	Member of MDR subfamily of ABC family; ortholog of S. cerevisiae ABC transporter, Atm1; induced in low iron; induced by nitric oxide independent of Yhb1	1.27479	1.27479	0.62162	1.35998	1.35998	0.08347
orf19.5952	0	Protein of unknown function; induced by nitric oxide independent of Yhb1; Sef1, Sfu1, and Hap43-induced; rat catheter and Spider biofilm induced	1.27451	1.27451	0.5589	-1.0039	0.99612	0.96716
orf19.2799	GPI8	Protein similar to S. cerevisiae Gpi8p, which is a subunit of the GPI transamidase complex that adds GPI anchors to proteins; likely to be essential for growth, based on an insertional mutagenesis strategy	1.27385	1.27385	0.07052	1.32194	1.32194	0.06224
orf19.5824	0	Protein of unknown function; rat catheter and Spider biofilm induced	1.27385	1.27385	0.10407	1.40964	1.40964	0.00623
orf19.3149	LSP1	Eisosome component with a predicted role in endocytosis; protein present in exponential and stationary growth phase yeast cultures; caspofungin repressed; biofilm induced; fungal-specific (no human/murine homolog); sumoylation target	1.27377	1.27377	0.3251	1.02573	1.02573	0.36859
orf19.4841	SHY1	Cytochrome c oxidase biosynthesis protein; transcript regulated by Nrg1 and Mig1	1.27354	1.27354	0.14789	1.47166	1.47166	0.01293
orf19.5384	CHS8	Chitin synthase required for synthesis of long-chitin fibrils; nonessential; 8 or 9 membrane spanning regions; mRNA present in yeast and hyphae; induced during cell wall regeneration; flow model biofilm repressed	1.27349	1.27349	0.05732	1.20093	1.20093	0.24021
orf19.2263	0	Has domain(s) with predicted adenyl nucleotide binding activity	1.27341	1.27341	0.48786	1.15077	1.15077	0.03253
orf19.1168	ZCF3	Zn(II)2Cys6 domain transcription factor; required for filamentous growth, resistance to rapamycin and flucytosine; possibly an essential gene, disruptants not obtained by UAU1 method; Hap43-repressed; Spider and flow model biofilm induced	1.2734	1.2734	0.17661	1.06744	1.06744	0.39656
orf19.5719	0	Predicted ORF from Assembly 19; removed from Assembly 20; subsequently reinstated in Assembly 21 and merged with orf19.1020 based on comparative genome analysis	1.27329	1.27329	0.00493	1.22054	1.22054	0.10719
orf19.3898	0	Ortholog(s) have SNAP receptor activity, role in endocytosis, vesicle fusion and Golgi apparatus, SNARE complex, endoplasmic reticulum, endosome, trans-Golgi network localization	1.27302	1.27302	0.04082	1.25155	1.25155	0.0168
orf19.6064	0	Ortholog(s) have phosphatidylinositol binding, ubiquitin binding activity	1.27268	1.27268	0.02701	1.07214	1.07214	0.51863
orf19.3490	FGR6-4	Protein lacking an ortholog in S. cerevisiae; member of a family encoded by FGR6-related genes in the RB2 repeat sequence; transposon mutation affects filamentous growth	1.27246	1.27246	0.21842	1.06117	1.06117	0.31446
orf19.3569	0	Protein of unknown function; S. cerevisiae YLR407W mutants have abnormal budding; constitutive expression independent of MTL or white-opaque status; Spider biofilm induced	1.27236	1.27236	0.01931	-1.01099	0.98913	0.92376
orf19.7645	0	Biotin protein ligase; catalyzes covalent attachment of biotin to biotin-dependent enzymes including acetyl CoA carboxylase and pyruvate carboxylase	1.27233	1.27233	0.14411	1.19746	1.19746	0.00666
orf19.6457	0	Ortholog of S. cerevisiae : YBL086C, C. glabrata CBS138 : CAGL0C01815g, C. dubliniensis CD36 : Cd36_72270, C. parapsilosis CDC317 : CPAR2_702850 and Candida tenuis NRRL Y-1498 : CANTEDRAFT_107537	1.2723	1.2723	0.06676	1.13474	1.13474	0.2413
orf19.1442	PLB4.5	Phospholipase B; Hog1-induced; regulated by Ssn6; putative GPI-anchor; repressed during cell wall regeneration; clade-associated gene expression; Hap43-induced; rat catheter and Spider biofilm repressed	1.27218	1.27218	0.10007	1.48912	1.48912	0.57218
orf19.895	HOG1	MAP kinase of osmotic-, heavy metal-, and core stress response; role in regulation of glycerol, D-arabitol in response to stress; phosphorylated in response to H2O2 (Ssk1-dependent) or NaCl; mutant induces protective mouse immune response	1.27168	1.27168	0.09377	1.49509	1.49509	0.01913
orf19.4003	TIP20	Protein interacting with Sec20p, possibly involved in retrograde transport between the Golgi and the endoplasmic reticulum; similar to S. cerevisiae Tip20p	1.27124	1.27124	0.26715	1.35687	1.35687	0.0056
orf19.7296	0	Putative cation conductance protein; similar to stomatin mechanoreception protein; plasma-membrane localized; induced by Rgt1; rat catheter and Spider biofilm induced	1.27121	1.27121	0.09959	1.72098	1.72098	0.08421
orf19.3174	CDC24	GDP-GTP exchange factor for Cdc42p; phosphorylated; required for maintenance of hyphal growth; misexpression blocks hyphal growth and causes avirulence in a mouse model of systemic infection; antigenic during human oral infection	1.27071	1.27071	0.308	1.21068	1.21068	0.04317
orf19.4918	0	Has domain(s) with predicted DNA binding activity	1.27067	1.27067	0.01084	1.24327	1.24327	0.1
orf19.5775	0	Predicted ORF overlapping the Major Repeat Sequence on chromosome 6; member of a family encoded by FGR6-related genes in the RB2 repeat sequence; rat catheter biofilm repressed	1.27061	1.27061	0.24249	1.01886	1.01886	0.50238
orf19.7290	0	Ortholog(s) have RNA cap binding activity, role in deadenylation-dependent decapping of nuclear-transcribed mRNA and cytoplasmic mRNA processing body, cytosol, mRNA cap binding complex, nucleus localization	1.27061	1.27061	0.00552	1.06158	1.06158	0.16603
orf19.5811	MET1	Putative uroporphyrin-3 C-methyltransferase, methionine biosynthesis enzyme; upregulated by human whole blood or polymorphonuclear (PMN) cells; Hog1p-induced; fungal-specific (no human or murine homolog); Hap43p-repressed	1.27056	1.27056	0.05096	1.1339	1.1339	0.24188
orf19.136	QDR3	Predicted membrane transporter, member of the drug:proton antiporter (12 spanner) (DHA1) family, major facilitator superfamily (MFS); Hap43p-repressed gene	1.26998	1.26998	0.16353	1.03957	1.03957	0.34266
orf19.3330.3	POX18	Similar to Pox18, a peroxisomal protein; induced during chlamydospore formation in C. albicans and C. dubliniensis; A21 sequence updated based on new sequence and analysis, the allelic orf19.10841 was reinstated; Spider biofilm induced	1.26945	1.26945	0.16573	1.08733	1.08733	0.24326
orf19.6459	DPP3	Protein similar to S. cerevisiae pyrophosphate phosphatase Dpp1; required for farnesol biosynthesis; repressed by 17-beta-estradiol, ethynyl estradiol; Spider biofilm induced	1.269	1.269	0.131	1.08437	1.08437	0.39294
orf19.6734	TCC1	Putative transcription factor/corepressor; regulation of filamentation and virulence; interacts with Tup1; regulates hypha-specific gene expression; contains 4 tetratricopeptide repeat (TPR) motifs; flucytosine repressed; Tbp1-induced	1.26865	1.26865	0.00253	1.37461	1.37461	0.05241
orf19.4028	RER2	Putative cis-prenyltransferase involved in dolichol synthesis; participates in endoplasmic reticulum (ER) protein sorting; flow model biofilm induced	1.26847	1.26847	0.01358	1.142	1.142	0.08612
orf19.6324	VID27	Protein similar to S. cerevisiae Vid27p; transposon mutation affects filamentous growth; mutation confers hypersensitivity to toxic ergosterol analog; fungal-specific (no human or murine homolog)	1.2684	1.2684	0.3386	1.50335	1.50335	0.0218
orf19.3876	ZCF19	Predicted Zn(II)2Cys6 transcription factor	1.26827	1.26827	0.05817	1.2047	1.2047	0.20743
orf19.4621	0	Ortholog(s) have cytoplasmic mRNA processing body localization	1.26817	1.26817	0.045	1.00614	1.00614	0.97798
orf19.5343	ASH1	GATA-like transcription factor; localizes to daughter cell, hyphal tip cell nuclei; mRNA localization mediated by She3; required for WT virulence and filamentous growth on solid media; Ras1 repressed in yeast, Cyr1 repressed yeast, hyphae	1.26814	1.26814	0.19618	-1.14167	0.87591	0.50216
orf19.4119	SPO72	Protein described as similar to S. cerevisiae sporulation protein; ortholog of S. cerevisiae Atg2, an autophagic vesicle formation protein; up-regulation associated with azole resistance; Spider biofilm induced	1.26811	1.26811	0.12851	1.19013	1.19013	0.12608
orf19.2704	0	Ortholog of Candida albicans WO-1 : CAWG_03507	1.26782	1.26782	0.17849	1.14145	1.14145
orf19.3283	0	Ortholog(s) have 3-oxoacyl-[acyl-carrier-protein] reductase (NADPH) activity, role in aerobic respiration, fatty acid metabolic process and mitochondrion localization	1.26698	1.26698	0.03522	-1.05822	0.94498	0.81951
orf19.641	0	Ortholog(s) have role in protein folding and endoplasmic reticulum localization	1.26688	1.26688	0.2987	1.13828	1.13828	0.04633
orf19.1523	FMO1	Putative oxidoreductase; mutation confers hypersensitivity to toxic ergosterol analog, and to amphotericin B	1.26642	1.26642	0.2398	1.20127	1.20127	0.12763
orf19.5804	HYU1	Putative hydantoin utilization protein A; induced upon adherence to polystyrene; regulated by Gcn2p and Gcn4p	1.26626	1.26626	0.27137	1.12213	1.12213	0.32594
orf19.1507	AMN1	Putative negative regulator of exit from mitosis; Plc1-regulated; rat catheter biofilm induced	1.26582	1.26582	0.06926	1.15229	1.15229	0.16504
orf19.1586	FGR22	Putative phosphatidylinositol-specific phospholipase C (PI-PLC); predicted type 2 membrane protein; no S. cerevisiae ortholog; role in, and regulated by, filamentation, Hap43p; almost identical to orf19.5797	1.26461	1.26461	0.41621	1.59062	1.59062	0.04639
orf19.5077	0	Protein of unknown function; Hap43-repressed gene; repressed by nitric oxide	1.26458	1.26458	0.14722	1.64698	1.64698	0.01085
orf19.3931.1	0	Pseudogene; added to Assembly 21 based on comparative genome analysis	1.26197	1.26197	0.28591	1.09826	1.09826
orf19.5975	TRY4	C2H2 transcription factor; fluconazole-repressed; induced in ssr1 mutant; required for yeast cell adherence to silicone substrate; Spider biofilm induced	1.26188	1.26188	0.30073	-1.01982	0.98057	0.78322
orf19.7098	0	Putative protein of unknown function; Hap43-repressed; repressed by nitric oxide; Spider biofilm induced	1.26172	1.26172	0.00099	1.35061	1.35061	0.03528
orf19.5542	SAP6	Secreted aspartyl protease; expressed during hyphal growth, oral carriage, infection; sap4,5,6 triple mutant defective in protein utilization as N source; virulence role affecte by URA3; N-glycosylated; rat catheter biofilm induced	1.26156	1.26156	0.17339	1.18673	1.18673	0.21862
orf19.1343	MED16	Putative RNA polymerase II mediator complex subunit; induced by nitric oxide	1.26076	1.26076	0.08868	-1.16002	0.86205	0.18568
orf19.2203.1	0	Ortholog of C. parapsilosis CDC317 : CPAR2_103590, Debaryomyces hansenii CBS767 : DEHA2C08118g, Pichia stipitis Pignal : psti_CGOB_00124 and Spathaspora passalidarum NRRL Y-27907 : SPAPADRAFT_49916	1.26006	1.26006	0.05201	-1.1151	0.89678	0.40416
orf19.3302	0	Putative type-1 protein phosphatase targeting subunit; transcript repressed by yeast-hyphal switch; transcript induced by Mnl1p under weak acid stress; flow model biofilm induced	1.25997	1.25997	0.30693	1.10452	1.10452	0.22002
orf19.3446	0	Ortholog(s) have Ran GTPase binding activity, role in protein import into nucleus and nucleus localization	1.25896	1.25896	0.01769	1.25346	1.25346	0.12259
orf19.6177	0	Protein of unknown function; Spider biofilm repressed	1.25877	1.25877	0.42618	-1.03091	0.97001	0.24325
orf19.925	SAM51	Component of the SAM complex involved in mitochondrial protein import, involved in beta-barrel protein assembly; member of the Omp85 protein family	1.25851	1.25851	0.18123	1.92293	1.92293	0.00789
orf19.4163	0	Ortholog(s) have role in protein targeting to vacuole, receptor-mediated endocytosis, response to pheromone and actin cortical patch, cytosol, endosome, plasma membrane, ribosome localization	1.2572	1.2572	0.30097	1.29466	1.29466	0.0152
orf19.6642	0	Ortholog(s) have role in ER to Golgi vesicle-mediated transport, cellular response to nitrogen starvation, negative regulation of G0 to G1 transition	1.25694	1.25694	0.04402	1.17664	1.17664	0.08048
orf19.1438	0	Protein with homology to NADH dehydrogenase; regulated by Sef1p-, Sfu1p-, and Hap43p	1.25646	1.25646	0.35268	1.0112	1.0112	0.39741
orf19.852	SAP98	Glycosyl-phosphatidylinositol-anchored aspartic endopeptidase; regulated by Gcn2p and Gcn4p; expressed only in opaque MTLa/MTLa cells	1.25618	1.25618	0.03784	1.08249	1.08249	0.24561
orf19.6313	MNT4	Predicted alpha-1,3-mannosyltransferase with a role in protein glycosylation; induced in low iron	1.25615	1.25615	0.27351	1.0215	1.0215	0.31021
orf19.6187	0	possible pseudouridine monophosphate glycosidase; overlaps orf19.6185 and orf19.618; has intron; Spider biofilm repressed	1.25581	1.25581	0.37767	-1.02637	0.97431	0.48846
orf19.4473	SPC19	Essential subunit of the Dam1 (DASH) complex, which acts in chromosome segregation by coupling kinetochores to spindle microtubules	1.25581	1.25581	0.71762	1.10841	1.10841	0.2082
orf19.2383	YKU80	Yku70p-Yku80p Ku complex subunit involved in nonhomologous end joining during double-strand break repair repair; Hap43-repressed gene; flow model biofilm induced	1.25567	1.25567	0.43317	1.1345	1.1345	0.13028
orf19.1161	PLD1	Phospholipase D1; required for phosphatidic acid and for most diacylglycerol production; required for wild-type mouse virulence, but not rat oral virulence; mutant defect in hyphal growth on solid substrates; similar to S. cerevisiae Spo14p	1.255	1.255	0.39404	1.31881	1.31881	0.23845
orf19.4069	0	Protein of unknown function; repressed by alpha pheromone in SpiderM medium	1.25482	1.25482	0.01962	1.24553	1.24553	0.47435
orf19.583	0	Indoleamine 2,3-dioxygenase (IDO); rate-limiting enzyme of tryptophan catabolism via kynurenine; enzyme inhibition by 1-methyl-D,L-tryptophan increases hyphal growth; expressed in yeast and hyphae; rat catheter and Spider biofilm induced	1.2548	1.2548	0.43533	1.12671	1.12671	0.0822
orf19.3895	CHT2	GPI-linked chitinase; required for normal filamentous growth; repressed in core caspofungin response; fluconazole, Cyr1, Efg1, pH-regulated; mRNA binds She3 and is localized to yeast-form buds and hyphal tips; Spider biofilm repressed	1.25454	1.25454	0.3771	1.24729	1.24729	0.17081
orf19.74	SEC5	Predicted exocyst component; ortholog of S. cerevisiae Sec5p; merged with orf19.75 in Assembly 21	1.25449	1.25449	0.2581	1.07571	1.07571	0.43323
orf19.4128	0	Ortholog of C. dubliniensis CD36 : Cd36_19390, C. parapsilosis CDC317 : CPAR2_209600, Candida tenuis NRRL Y-1498 : CANTEDRAFT_134010 and Debaryomyces hansenii CBS767 : DEHA2C14960g	1.2543	1.2543	0.12386	1.23381	1.23381	0.07083
orf19.7139	0	Ortholog(s) have role in mRNA splicing, via spliceosome	1.25388	1.25388	0.86871	1.30565	1.30565	0.00178
orf19.4109	PMT4	Protein mannosyltransferase; required for WT cell wall composition and virulence in mice; roles in hyphal growth and drug sensitivity; one of 5 family members; Axl2 a substrate; Spider biofilm repressed; Bcr1-repressed in RPMI a/a biofilm	1.25379	1.25379	0.09998	-1.40953	0.70945	0.00114
orf19.3201	MTLA1	Homeodomain protein of the MTLa mating type locus; a1 and alpha2 together repress white-opaque switching and mating (an opaque-specific process); a/alpha mating type may increase virulence by competitive advantage; Spider biofilm induced	1.25375	1.25375	0.36783	1.04989	1.04989	0.35969
orf19.6867	0	Protein with a predicted cytochrome b5-like heme/steroid binding domain; repressed by alpha pheromone in SpiderM medium	1.2536	1.2536	0.18934	1.34605	1.34605	0.05238
orf19.4412	0	Ortholog(s) have DNA-directed DNA polymerase activity, deoxycytidyl transferase activity and role in error-free translesion synthesis, error-prone translesion synthesis	1.25317	1.25317	0.20703	1.15341	1.15341	0.12457
orf19.1239	0	Secreted protein; exogenously expressed protein is a substrate for Kex2 processing in vitro; fluconazole-regulated; Spider biofilm induced	1.25305	1.25305	0.39179	1.26662	1.26662	0.03006
orf19.841	0	Ortholog(s) have role in Golgi vesicle transport and Golgi membrane localization	1.25211	1.25211	0.02621	-1.04775	0.95443	0.23401
orf19.1901	MCM3	Putative DNA replication protein; periodic mRNA expression, peak at cell-cycle M/G1 phase; Spider biofilm induced	1.25208	1.25208	0.69281	-1.12887	0.88584	0.10172
orf19.7469	ARG1	Argininosuccinate synthase; arginine synthesis; Gcn4, Rim101 regulated; induced by amino acid starvation (3-AT), benomyl treatment; stationary phase enriched protein; repressed in alkalinizing medium; rat catheter, Spider biofilm induced	1.25208	1.25208	0.04611	1.31514	1.31514	0.11653
orf19.7425	0	Ortholog(s) have uracil DNA N-glycosylase activity, role in DNA repair and mitochondrion, nucleus localization	1.25197	1.25197	0.21354	1.17816	1.17816	0.09851
orf19.4505	ADH3	Putative NAD-dependent (R,R)-butanediol dehydrogenase; regulated by white-opaque switch; induced by nitric oxide independent of Yhb1; Spider biofilm induced	1.25183	1.25183	0.07597	1.26353	1.26353	0.21704
orf19.2028	MXR1	Putative methionine sulfoxide reductase; Plc1-regulated; induced by human neutrophils, flucytosine; macrophage regulated (gene induced, protein decreased); possibly adherence-induced; Spider biofilm induced	1.25175	1.25175	0.21886	1.12439	1.12439	0.32492
orf19.3661	0	Putative deubiquitinating enzyme; induced by Mnl1 under weak acid stress	1.25048	1.25048	0.1069	1.36616	1.36616	0.00863
orf19.173	0	C2H2 transcription factor; induced by Mnl1 under weak acid stress	1.25023	1.25023	0.27379	1.01346	1.01346	0.57264
orf19.6447	ARF1	ADP-ribosylation factor; probable GTPase involved in intracellular transport; one of several C. albicans ADP-ribosylation factors; N-myristoylprotein; substrate of Nmt1; Spider biofilm induced	1.25022	1.25022	0.3641	1.24163	1.24163	0.09059
orf19.3609	UTP15	Small subunit (SSU) processome component; mutation confers resistance to 5-fluorocytosine (5-FC); physically interacts with TAP-tagged Nop1p	1.25005	1.25005	0.16624	1.11265	1.11265	0.03119
orf19.4858	VPS41	Protein similar to S. cerevisiae Vps41p, which is involved in vacuole organization and biogenesis; transposon mutation affects filamentous growth; regulated by Gcn4p; induced in response to amino acid starvation (3-aminotriazole treatment)	1.2496	1.2496	0.04663	1.25577	1.25577	0.12031
orf19.1628	LAP41	Putative aminopeptidase yscI precursor; mutant is viable; protein present in exponential and stationary growth phase yeast cultures; Spider biofilm repressed	1.24957	1.24957	0.02632	-1.0232	0.97732	0.88732
orf19.4768	0	Protein of unknown function; Spider biofilm induced	1.24941	1.24941	0.05316	1.25935	1.25935	0.08061
orf19.6759	#N/A	#N/A	1.2493	1.2493	0.03949	1.26722	1.26722	0.06494
orf19.6440	0	Ortholog(s) have ubiquitin-protein ligase activity, role in ubiquitin-dependent protein catabolic process and endoplasmic reticulum membrane, nuclear inner membrane localization	1.24905	1.24905	0.03079	1.15457	1.15457	0.28533
orf19.6005	HGT5	Putative glucose transporter of the major facilitator superfamily; the C. albicans glucose transporter family comprises 20 members; 12 probable membrane-spanning segments, extended N terminus; expressed in rich medium; Hap43p-repressed	1.24892	1.24892	0.12307	1.29325	1.29325	0.04331
orf19.3152	AMO2	Protein similar to A. niger predicted peroxisomal copper amino oxidase; mutation confers hypersensitivity to toxic ergosterol analog; F-12/CO2 early biofilm induced	1.24871	1.24871	0.14513	1.02115	1.02115	0.38619
orf19.1460	0	Putative glutamine-dependent NAD synthetase, involved in NAD salvage pathway	1.24859	1.24859	0.15471	1.02126	1.02126	0.30452
orf19.1420	0	Ortholog(s) have cytosol, nucleus localization	1.24848	1.24848	0.20895	1.11937	1.11937	0.59246
orf19.1257	0	Ortholog of Candida albicans WO-1 : CAWG_03251	1.24841	1.24841	0.21422	-1.00525	0.99478	0.78066
orf19.3840	0	Putative serine/threonine kinase similar to S. cerevisiae Sak1; possibly an essential gene, disruptants not obtained by UAU1 method; Spider biofilm induced	1.24836	1.24836	0.24114	1.14064	1.14064	0.15219
orf19.6043	0	Ortholog(s) have mitochondrial membrane localization	1.2483	1.2483	0.02735	1.2012	1.2012	0.03885
orf19.6889	MKK2	Ortholog of S. cerevisiae Mkk2; MAP kinase kinase involved in signal transduction; macrophage-downregulated; mutants are viable and hypersensitive to caspofungin	1.24825	1.24825	0.01216	1.30579	1.30579	0.01503
orf19.2163	0	Ortholog(s) have cytosol localization	1.24822	1.24822	0.33637	1.03747	1.03747	0.95292
orf19.4849	0	Protein required for localizing proteasomes to the nucleus; involved in ubiquitin-mediated protein degradation; possibly an essential gene, disruptants not obtained by UAU1 method; Spider biofilm induced	1.24766	1.24766	0.80395	1.3907	1.3907	0.06538
orf19.3013	CDC12	Septin; essential for viability; forms ring at sites of cell division and also forms filaments in mature chlamydospore; filamentous growth induced; regulated by Nrg1, Tup1, tyrosol and cell density; rat catheter biofilm repressed	1.24749	1.24749	0.24036	1.35181	1.35181	0.01223
orf19.2479	UGA4	Putative gamma-aminobutyric acid/polyamine permease; nitrogen catabolite repressed gene, induced in absence of preferred N sources; transcriptionally induced upon phagocytosis by macrophage; gene regulation by nitrogen source requires Gat1p	1.24732	1.24732	0.08438	-1.06427	0.93961	0.58561
orf19.390	CDC42	Rho-type GTPase; required for budding and maintenance of hyphal growth; GGTase I geranylgeranylated; misexpression blocks hyphal growth, causes avirulence in mouse IV infection; shows actin-dependent localization to hyphal tip	1.24684	1.24684	0.30428	1.27114	1.27114	0.01201
orf19.4390	0	Protein of unknown function; repressed by alpha pheromone in SpiderM medium; transcript induced by Mnl1 under weak acid stress	1.24632	1.24632	0.22724	1.44646	1.44646	0.11049
orf19.6927	PEP8	Protein similar to S. cerevisiae Pep8p, which is involved in retrograde transport; transposon mutation affects filamentous growth	1.24618	1.24618	0.03006	1.09124	1.09124	0.04304
orf19.1721	NCE103	Carbonic anhydrase; converts of CO2 to bicarbonate; essential for virulence in host niches with limited CO2, normal white-opaque switch; Mnl1-induced in weak acid stress; Hap43-induced gene; F-12/CO2, rat catheter, Spider biofilm induced	1.24576	1.24576	0.03012	1.10334	1.10334	0.30337
orf19.371	0	Ortholog of C. dubliniensis CD36 : Cd36_40110, C. parapsilosis CDC317 : CPAR2_402300, Candida tenuis NRRL Y-1498 : CANTEDRAFT_94507 and Debaryomyces hansenii CBS767 : DEHA2F05588g	1.24556	1.24556	0.10787	1.09494	1.09494	0.37674
orf19.1800	0	Protein of unknown function; Spider biofilm induced	1.24554	1.24554	0.01001	1.06686	1.06686	0.73879
orf19.6367	SSB1	HSP70 family heat shock protein; mRNA in yeast and germ tubes; at yeast cell surface, not hyphae; antigenic in human/mouse infection; macrophage, GCN-induced; possibly essential; sumoylation target; Hap43-induced; Spider biofilm repressed	1.24542	1.24542	0.40112	-1.19311	0.83814	0.46032
orf19.2792	IST2	Ortholog(s) have lipid binding activity, role in endoplasmic reticulum membrane organization, regulation of phosphatidylinositol dephosphorylation and cellular bud membrane, cortical endoplasmic reticulum localization	1.24489	1.24489	0.26633	1.16166	1.16166	0.10526
orf19.6600	0	Ortholog(s) have phosphatidic acid transporter activity and role in cardiolipin metabolic process, phospholipid transport, positive regulation of phosphatidylcholine biosynthetic process	1.24447	1.24447	0.2359	1.16656	1.16656	0.06927
orf19.2302	0	Ortholog(s) have enzyme regulator activity, role in cellular calcium ion homeostasis and integral to endoplasmic reticulum membrane localization	1.24423	1.24423	0.66589	1.38531	1.38531	0.23255
orf19.851	0	Protein of unknown function; repressed by Rim101; negatively modulates intracellular ATP levels during the development of azole resistance; induced by Ca(2+) in a calcineurin-dependent manner; Spider biofilm induced	1.244	1.244	0.02715	1.29351	1.29351	0.05462
orf19.3473	0	Ortholog(s) have enzyme activator activity, histone acetyltransferase activity, structural molecule activity	1.24359	1.24359	0.31075	1.09264	1.09264	0.04719
orf19.1055	CDC3	Septin; essential for viability; functional homolog of S. cerevisiae Cdc3p; down-regulation associated with azole resistance; macrophage/pseudohyphal-repressed; virulence-group-correlated expression; gene has intron	1.24251	1.24251	0.09545	1.36484	1.36484	0.0743
orf19.2178.1	0	Protein of unknown function; Spider biofilm induced	1.24248	1.24248	0.53603	1.26367	1.26367	0.21301
orf19.3526	ITR1	MFS inositol transporter; uptake of exogenous inositol; 12 transmembrane motifs; expressed in rich medium; fluconazole, caspofungin repressed; possibly essential (UAU1 method); flow model, rat catheter and Spider biofilm induced	1.24245	1.24245	0.26346	1.56652	1.56652	0.06118
orf19.4839	0	GET complex subunit; expression downregulated in an ssr1 null mutant	1.24173	1.24173	0.08419	1.39051	1.39051	0.0671
orf19.528	SEC26	Secretory vesicles coatomer complex protein	1.2417	1.2417	0.14338	-1.10089	0.90836	0.02619
orf19.6342	0	Ortholog of C. dubliniensis CD36 : Cd36_11980, C. parapsilosis CDC317 : CPAR2_201330, Candida tenuis NRRL Y-1498 : CANTEDRAFT_114815 and Debaryomyces hansenii CBS767 : DEHA2G10032g	1.24119	1.24119	0.18492	1.03634	1.03634	0.52522
orf19.5941	0	Ortholog(s) have role in ER to Golgi vesicle-mediated transport and ER to Golgi transport vesicle, integral to Golgi membrane, integral to endoplasmic reticulum membrane localization	1.24097	1.24097	0.09249	1.0713	1.0713	0.00618
orf19.1902	NOC4	Putative nucleolar protein; Hap43-induced; mutation confers resistance to 5-fluorocytosine (5-FC), 5-fluorouracil (5-FU), and tubercidin (7-deazaadenosine); Spider biofilm induced	1.24065	1.24065	0.52829	1.06939	1.06939	0.44066
orf19.2781	0	Protein with predicted serine/threonine kinase and tyrosine kinase domains; possibly an essential gene, disruptants not obtained by UAU1 method; Spider biofilm induced	1.24063	1.24063	0.26729	1.08207	1.08207	0.22961
orf19.6214	ATC1	Cell wall acid trehalase; catalyzes hydrolysis of the disaccharide trehalose; similar to S. cerevisiae vacuolar acid trehalase (Ath1p); Hap43p-repressed gene	1.24061	1.24061	0.2753	-1.27777	0.78261	0.04496
orf19.1418	SEC15	Predicted exocyst subunit; cellular bud tip-associated protein; ortholog of S. cerevisiae SEC15	1.24061	1.24061	0.20016	1.04681	1.04681	0.21639
orf19.7030	SSR1	Beta-glucan associated ser/thr rich cell-wall protein with a role in cell wall structure; GPI anchor; similar mRNA abundance in yeast-form and germ tubes; detected at germ tube plasma membrane; repressed in cells treated with Congo Red	1.24001	1.24001	0.28699	1.08771	1.08771	0.40241
orf19.3854	0	Ortholog of S. cerevisiae Sat4; amphotericin B induced; clade-associated gene expression; Spider biofilm induced	1.23949	1.23949	0.03836	1.03364	1.03364	0.05582
orf19.676	0	Microtubule-binding protein of the cortical microtubule; delays exit from mitosis when the spindle is abnormally oriented; Spider biofilm repressed	1.23941	1.23941	0.64385	1.27036	1.27036	0.02092
orf19.7199	0	Ortholog(s) have TRC complex, nucleus localization	1.23902	1.23902	0.04429	-1.27417	0.78482	0.06723
orf19.1737	0	Ortholog of Candida albicans WO-1 : CAWG_01802	1.2389	1.2389	0.27439	1.00533	1.00533	0.82938
orf19.1796	0	Putative glyoxylate reductase; acts on glyoxylate and hydroxypyruvate substrates; Spider biofilm repressed	1.23842	1.23842	0.38592	1.30018	1.30018	0.3621
orf19.4724	0	Ortholog(s) have RNA binding activity, role in spliceosomal complex assembly and U2-type prespliceosome localization	1.23835	1.23835	0.0951	1.53919	1.53919	0.00477
orf19.2268	RCK2	Predicted MAP kinase-activated protein kinase, similar to S. cerevisiae serine/threonine protein kinase Rck2p; induced by osmotic stress via Hog1p; macrophage/pseudohyphal-repressed; mutants are sensitive to rapamycin	1.23825	1.23825	0.01574	1.15022	1.15022	0.41366
orf19.7124	RVS161	Protein required for endocytosis; contains a BAR domain, which is found in proteins involved in membrane curvature; null mutant exhibits defects in hyphal growth, virulence, cell wall integrity, and actin patch localization	1.23805	1.23805	0.14468	1.14996	1.14996	0.19297
orf19.6184	0	Protein of unknown function; Spider biofilm repressed	1.23786	1.23786	0.36194	1.10024	1.10024	0.19147
orf19.3848	0	Ortholog of C. dubliniensis CD36 : Cd36_31420, C. parapsilosis CDC317 : CPAR2_205100, Debaryomyces hansenii CBS767 : DEHA2G10648g and Pichia stipitis Pignal : PICST_32997	1.23764	1.23764	0.93322	1.1007	1.1007	0.16529
orf19.2899	0	Ortholog(s) have cytosol, nucleus localization	1.23755	1.23755	0.03705	1.07111	1.07111	0.23379
orf19.467	WOR3	Transcription factor; modulator of white-opaque switch; induced in opaque cells; promoter bound by Wor1; overexpression at 25 degr shifts cells to opaque state; deletion stabilizes opaque cells at higher temperatures; Spider biofilm induced	1.23745	1.23745	0.13894	1.33308	1.33308	0.05826
orf19.7577	MSS51	Putative mRNA maturation factor; fungal-specific (no human or murine homolog)	1.23712	1.23712	0.09783	1.07475	1.07475	0.84333
orf19.374	0	Ortholog(s) have role in protein targeting to vacuole involved in ubiquitin-dependent protein catabolic process via the multivesicular body sorting pathway	1.23703	1.23703	0.31024	1.10277	1.10277	0.69321
orf19.3241	0	Ortholog(s) have Seh1-associated complex, extrinsic to fungal-type vacuolar membrane localization	1.23668	1.23668	0.09593	1.25838	1.25838	0.02761
orf19.2929	GSC1	Essential beta-1,3-glucan synthase subunit; gsc1 allele determines resistance/sensitivity to echinocandins; 16 predicted membrane-spanning regions; mRNA abundance declines after yeast-to-hypha transition; Spider biofilm induced	1.23664	1.23664	0.34697	1.30848	1.30848	0.04757
orf19.6898	0	Protein similar to S. pombe SPBC1709.16c a predicted aromatic ring-opening dioxygenase; induced by benomyl treatment or in azole-resistant strain that overexpresses MDR1; Spider biofilm induced	1.23639	1.23639	0.29196	1.32427	1.32427	0.11023
orf19.4579	ERV29	Putative SURF4 family member; plasma membrane-localized; flow model biofilm repressed	1.23618	1.23618	0.05434	1.06216	1.06216	0.54791
orf19.6456	0	Ortholog of C. dubliniensis CD36 : Cd36_72280, C. parapsilosis CDC317 : CPAR2_703040, Candida tenuis NRRL Y-1498 : CANTEDRAFT_125842 and Debaryomyces hansenii CBS767 : DEHA2B05984g	1.23596	1.23596	0.03179	-1.08736	0.91966	0.13137
orf19.4632	RPL20B	Ribosomal protein L20; repressed upon phagocytosis by murine macrophage; alternatively spliced intron in 5' UTR; Hap43-induced; Spider biofilm repressed	1.23578	1.23578	0.33384	-1.09191	0.91583	0.32293
orf19.1863	0	Has domain(s) with predicted Rho guanyl-nucleotide exchange factor activity, role in regulation of Rho protein signal transduction and intracellular localization	1.23549	1.23549	0.3969	-1.09653	0.91197	0.10573
orf19.5508	0	Ortholog of Candida albicans WO-1 : CAWG_05700	1.23484	1.23484	0.05557	-1.16161	0.86087	0.32704
orf19.2135	TSM1	Putative transcription initiation factor TFIID subunit; transcript is upregulated in clinical isolates from HIV+ patients with oral candidiasis; Nrg1-regulated	1.23484	1.23484	0.25701	-1.04029	0.96127	0.58101
orf19.5702	0	Ortholog(s) have cell division site, spindle localization	1.23447	1.23447	0.31444	-1.10443	0.90544	0.41144
orf19.4368	0	Has domain(s) with predicted hydrolase activity and role in cellular process	1.23429	1.23429	0.0839	1.53049	1.53049	0.08901
orf19.1389	0	Ortholog(s) have poly(A) RNA binding activity, role in mRNA metabolic process and cytoplasm localization	1.2341	1.2341	0.4052	1.16507	1.16507	0.39282
orf19.6038	UGA32	Predicted Zn(II)2Cys6 transcription factor; has similarity to S. cerevisiae Uga3, a transcription factor involved in the regulation of gamma-aminobutyrate metabolism genes; rat catheter biofilm induced	1.23401	1.23401	0.24196	1.09644	1.09644	0.67961
orf19.2962	0	Protein of unknown function; Spider biofilm induced	1.23395	1.23395	0.00494	1.78409	1.78409	0.02806
orf19.427	0	Ortholog(s) have telomeric DNA binding activity and role in chromatin silencing at silent mating-type cassette, chromatin silencing at telomere, single-species biofilm formation on inanimate substrate, telomere capping	1.233	1.233	0.35923	1.45714	1.45714	0.00303
orf19.5003	0	Ortholog(s) have GTPase regulator activity and cytoplasm, nuclear envelope localization	1.23233	1.23233	0.25459	1.41996	1.41996	0.07204
orf19.717	HSP60	Heat shock protein; soluble in hyphae; regulated by Nrg1 and by iron; induced in high iron; heavy metal (cadmium) stress-induced; sumoylation target; protein present in exponential and stationary phase cells; Hap43-repressed	1.23206	1.23206	0.28868	1.31565	1.31565	0.19797
orf19.4190	PAM18	Predicted component of the presequence translocase-associated import motor (PAM complex) involved in protein import into mitochondrial matrix; rat catheter biofilm induced	1.23167	1.23167	0.27911	1.18287	1.18287	0.02554
orf19.7510	KIN2	Protein with similarity to S. cerevisiae Kin2p, transcription is positively regulated by Tbf1	1.23152	1.23152	0.98149	1.20105	1.20105	0.06172
orf19.6393	0	Putative Arf3p GTPase activating protein; Hap43p-repressed gene; possibly an essential gene, disruptants not obtained by UAU1 method	1.23146	1.23146	0.10062	-1.05334	0.94937	0.94277
orf19.994	0	Protein of unknown function; induced by Mnl1 under weak acid stress; flow model biofilm repressed	1.23146	1.23146	0.16515	1.30244	1.30244	0.16024
orf19.7460	0	Putative 2'-O-methyltransferase with a predicted role in tRNA modification; transcription is activated in the presence of elevated CO2	1.23133	1.23133	0.27281	1.47451	1.47451	0.05497
orf19.5357	AKL1	Putative serine/threonine protein kinase; induced during the mating process	1.23119	1.23119	0.03368	1.29365	1.29365	0.01464
orf19.5584	PEP3	Peptidase; activity useful for strain identification by multilocus enzyme electrophoresis (MLEE); clade-associated gene expression	1.23057	1.23057	0.11749	-1.03784	0.96354	0.87561
orf19.7398.1	TSA1B	Putative peroxidase; orf19.7398.1 is contig-truncated fragment of gene identical to TSA1; Tsa1p and Tsa1Bp role under oxidative/reductive stress, hyphal cell wall formation; in hyphal nucleus, cell wall; yeast-form nucleus, cytoplasm	1.23045	1.23045	0.20614	1.01906	1.01906	0.43535
orf19.6302	PGA39	Putative GPI-anchored protein	1.23041	1.23041	0.22688	1.02408	1.02408	0.68606
orf19.5572	0	Protein of unknown function; Spider biofilm repressed	1.23032	1.23032	0.10771	-1.05147	0.95105	0.52005
orf19.2057	0	Ortholog(s) have ATP binding, ATPase activity, metallopeptidase activity, role in protein complex assembly, proteolysis, signal peptide processing and m-AAA complex, mitochondrial inner boundary membrane localization	1.23024	1.23024	0.51307	1.48201	1.48201	0.15207
orf19.302	0	Ortholog(s) have Rab guanyl-nucleotide exchange factor activity, role in ER to Golgi vesicle-mediated transport and TRAPP complex, cytosol, nucleus localization	1.23003	1.23003	0.31418	1.14318	1.14318	0.06969
orf19.539	LAP3	Putative aminopeptidase; positively regulated by Sfu1; clade-associated gene expression; virulence-group-correlated expression; induced by alpha pheromone in SpiderM medium; Hap43-induced; Spider and flow model biofilm induced	1.22984	1.22984	0.27847	1.1565	1.1565	0.1428
orf19.7389	REV3	Ortholog(s) have DNA-directed DNA polymerase activity, role in error-free translesion synthesis, error-prone translesion synthesis and cytosol, mitochondrion, nuclear chromatin, nucleus, zeta DNA polymerase complex localization	1.22975	1.22975	0.45576	1.22392	1.22392	0.0272
orf19.3676	ABP140	Ortholog of S. cerevisiae actin-binding protein Abp140; Hap43-induced; F-12/CO2 early biofilm induced	1.22947	1.22947	0.00291	1.48925	1.48925	0.01598
orf19.4275	RAD9	DNA damage-dependent checkpoint protein; involved in regulation of DNA-damage-induced filamentous growth; induced by alpha pheromone in SpiderM medium	1.22921	1.22921	0.08516	1.05977	1.05977	0.31997
orf19.5667	MNR2	Putative ion transporter; fungal-specific (no human or murine homolog)	1.22905	1.22905	0.00736	1.3375	1.3375	0.01905
orf19.5932	0	Protein of unknown function; Spider biofilm induced	1.2288	1.2288	0.05355	1.12061	1.12061	0.11975
orf19.1754	CMK2	Putative calmodulin-dependent protein kinase; involved in cell wall integrity and oxidative stress response	1.22797	1.22797	0.09684	1.071	1.071	0.69282
orf19.3981	MAL31	Putative high-affinity maltose transporter; transcript is upregulated in clinical isolates from HIV+ patients with oral candidiasis; alkaline induced; Spider biofilm induced	1.22779	1.22779	0.27893	1.28597	1.28597	0.02531
orf19.4153	0	Ortholog(s) have NEDD8 activating enzyme activity, role in protein neddylation and cytosol, nucleus localization	1.22776	1.22776	0.02406	-1.04451	0.95739	0.60877
orf19.418	KOG1	Putative TORC1 subunit; heterozygous null mutant displays sensitivity to rapamycin; likely to be essential for growth, based on an insertional mutagenesis strategy	1.22774	1.22774	0.40575	-1.04164	0.96003	0.71494
orf19.423	0	Ortholog(s) have enzyme activator activity, m7G(5')pppN diphosphatase activity, mRNA binding activity, role in deadenylation-dependent decapping of nuclear-transcribed mRNA and cytoplasmic mRNA processing body localization	1.22737	1.22737	0.88137	1.1064	1.1064	0.36122
orf19.4961	STP2	Amino-acid-regulated transcription factor; activates transcription of amino acid permease genes; activated by amino-acid-induced proteolytic processing (Ssy1, Csh3 dependent); required for alkalinization of medium; Spider biofilm induced	1.22725	1.22725	0.31128	-1.05111	0.95138	0.67058
orf19.2114	0	Predicted uricase; ortholog of S. pombe SPCC1223.09; Spider biofilm induced	1.22683	1.22683	0.19915	1.0168	1.0168	0.03098
orf19.4122	0	Ortholog(s) have acyl-CoA hydrolase activity, role in fatty acid beta-oxidation and mitochondrion, peroxisome localization	1.22658	1.22658	0.8024	1.33249	1.33249	0.02444
orf19.5250	0	Has domain(s) with predicted cofactor binding activity	1.22638	1.22638	0.15769	1.13231	1.13231	0.04646
orf19.5248	MSO1	Putative secretory protein involved in S. cerevisiae sporulation; repressed during pseudohyphal growth in the presence of lysed macrophages; Hap43-repressed; Spider biofilm induced	1.22596	1.22596	0.15127	1.29218	1.29218	0.23699
orf19.1973	HAP5	Component of CCAAT-binding transcription factor; roles in filamentous growth, low-iron induction of FRP1; regulates genes involved in respiratory growth; functional homolog of S. cerevisiae Hap5p; Cap1p-dependent expression in low iron	1.22587	1.22587	0.16123	-1.0153	0.98493	0.73747
orf19.1444	0	Ortholog(s) have phosphatidylinositol-4,5-bisphosphate binding activity, role in actin cortical patch assembly, actin filament organization, endocytosis and actin cortical patch, mating projection tip localization	1.22587	1.22587	0.08963	1.32643	1.32643	0.05488
orf19.1186	0	Has domain(s) with predicted role in attachment of GPI anchor to protein and GPI-anchor transamidase complex localization	1.22573	1.22573	0.02859	1.30034	1.30034	0.01164
orf19.971	SKN7	Putative homolog of S. cerevisiae Skn7p, which is predicted to be a response regulator protein in a phosphorelay signal transduction pathway; required for normal hydrogen peroxide resistance	1.22522	1.22522	0.72505	1.02118	1.02118	0.42733
orf19.493	RPL15A	Putative ribosomal protein; repressed upon phagocytosis by murine macrophage; positively regulated by Tbf1; Spider biofilm repressed	1.22501	1.22501	0.17629	1.08399	1.08399	0.55137
orf19.5892	0	Ortholog of S. cerevisiae Hul4; similar to hect domain E3 ubiquitin-protein ligases; Hap43-repressed gene	1.22487	1.22487	0.06715	1.00961	1.00961	0.65327
orf19.4811	0	Putative tricarboxylate carrier family protein; localized to the mitochondrial membrane	1.2248	1.2248	0.69859	1.20147	1.20147	0.00675
orf19.7436.1	ECM15	Protein of unknown function; predicted role in cell wall organization; Hap43-repressed; caspofungin repressed; Spider biofilm induced; rat catheter biofilm repressed	1.22452	1.22452	0.04605	-1.14385	0.87424	0.20081
orf19.5658	MNN10	Ortholog(s) have alpha-1,6-mannosyltransferase activity, role in ascospore formation, barrier septum assembly and alpha-1,6-mannosyltransferase complex localization	1.22429	1.22429	0.30414	1.18094	1.18094	0.11396
orf19.946	MET14	Putative adenylylsulfate kinase; predicted role in sulfur metabolism; possibly adherence-induced; protein present in exponential and stationary growth phase yeast; F-12/CO2 biofilm induced	1.22389	1.22389	0.12206	-1.33792	0.74743	0.21002
orf19.900	NSP1	Essential component of the nuclear pore complex; sumoylation target; stationary phase enriched protein; rat catheter biofilm repressed	1.22382	1.22382	0.12532	1.37493	1.37493	0.02251
orf19.2654	RMS1	Putative lysine methyltransferase; Hap43-induced; protein induced during mating; possibly essential, disruptants not obtained by UAU1 method; rat catheter and Spider biofilm induced	1.22345	1.22345	0.86047	1.09492	1.09492	0.19635
orf19.1370	0	Protein of unknown function; expression regulated by white-opaque switch; repressed by alpha pheromone in SpiderM medium	1.22344	1.22344	0.33142	1.24804	1.24804	0.05499
orf19.6874	0	Putative helix-loop-helix (HLH) transcription factor with a role in filamentous growth	1.22342	1.22342	0.22482	-1.09778	0.91093	0.17292
orf19.5797	PLC2	Phosphatidylinositol (PtdIns)-specific phospholipase C (PI-PLC); predicted type 2 membrane protein; role in, and regulated by, filamentation, Nrg1 and Tup1; no mouse systemic virulence role; orf19.5797 and orf19.1586 are almost identical	1.2234	1.2234	0.22984	1.52541	1.52541	0.06375
orf19.4723	FAD1	Ortholog(s) have ATP binding, FMN adenylyltransferase activity, magnesium ion binding activity, role in FAD biosynthetic process and cytosol, nucleus localization	1.22305	1.22305	0.98391	-1.10832	0.90227	0.38381
orf19.7267	SAM35	Predicted component of the sorting and assembly machinery (SAM complex) of the mitochondrial outer membrane, involved in protein import into mitochondria	1.22256	1.22256	0.29526	-1.12727	0.8871	0.01481
orf19.4247	0	Protein of unknown function; rat catheter and Spider biofilm repressed	1.22231	1.22231	0.14366	1.36555	1.36555	0.01686
orf19.3355	ISN1	Putative inosine 5'-monophosphate 5'-nucleotidase; fungal-specific (no human or murine homolog)	1.2218	1.2218	0.22802	1.08877	1.08877	0.33093
orf19.5175	0	Ortholog(s) have ubiquitin-protein ligase activity, role in ER-associated ubiquitin-dependent protein catabolic process and Doa10p ubiquitin ligase complex, integral to endoplasmic reticulum membrane, nuclear inner membrane localization	1.22144	1.22144	0.15961	-1.06228	0.94137	0.24719
orf19.1396	0	Ortholog(s) have ARF GTPase activator activity, role in ER to Golgi vesicle-mediated transport, intra-Golgi vesicle-mediated transport and Golgi apparatus, clathrin-coated vesicle localization	1.2214	1.2214	0.44038	1.06948	1.06948	0.70697
orf19.7115	SAC7	Putative GTPase activating protein (GAP) for Rho1; repressed upon adherence to polystyrene; macrophage/pseudohyphal-repressed; transcript is upregulated in RHE model of oral candidiasis and in clinical oral candidiasis	1.2214	1.2214	0.05467	1.23112	1.23112	0.30389
orf19.3077	VID21	Subunit of the NuA4 histone acetyltransferase complex; soluble protein in hyphae; Spider biofilm repressed	1.22122	1.22122	0.02659	-1.01123	0.98889	0.98219
orf19.7036	0	Ortholog(s) have phosphatase activator activity, role in actin filament organization, endocytosis, mitochondrion degradation, regulation of growth, response to heat, response to salt stress and cytosol, nucleus localization	1.22105	1.22105	0.1077	1.0539	1.0539	0.21533
orf19.6650	0	Ortholog of C. dubliniensis CD36 : Cd36_30990, C. parapsilosis CDC317 : CPAR2_204660, Candida tenuis NRRL Y-1498 : CANTEDRAFT_104939 and Debaryomyces hansenii CBS767 : DEHA2G23760g	1.22093	1.22093	0.37465	1.15875	1.15875	0.13024
orf19.3409	SEC12	Putative guanyl-nucleotide exchange factor; induced in high iron; Hap43-repressed	1.22084	1.22084	0.1286	-1.20224	0.83178	0.51855
orf19.1246	0	Putative eisosome component role in proper eisosome assembly; upregulated in cyr1 null mutant	1.22048	1.22048	0.09681	1.02772	1.02772	0.36488
orf19.1873	0	Protein of unknown function; Hap43-repressed gene; repressed by nitric oxide	1.22042	1.22042	0.27659	1.38527	1.38527	0.01398
orf19.52	0	Ortholog(s) have role in cellular iron ion homeostasis and mitochondrion localization	1.22034	1.22034	0.27724	1.31656	1.31656	0.00159
orf19.5501	YAF9	Subunit of the NuA4 histone acetyltransferase complex; transcript regulated by Mig1; possibly an essential gene, disruptants not obtained by UAU1 method	1.22033	1.22033	0.12395	1.07361	1.07361	0.22246
orf19.4744	0	Putative phosphatidylinositol 3-phosphate (PI3P) phosphatase; repressed by alpha pheromone in SpiderM medium	1.21977	1.21977	0.49001	1.16354	1.16354	0.04735
orf19.827	0	Ortholog of C. dubliniensis CD36 : Cd36_18620, C. parapsilosis CDC317 : CPAR2_212480, Candida tenuis NRRL Y-1498 : CANTEDRAFT_115371 and Debaryomyces hansenii CBS767 : DEHA2D06798g	1.21967	1.21967	0.96095	1.04012	1.04012	0.82114
orf19.7177	KAP120	Putative karyopherin; mutation confers hypersensitivity to cytochalasin D	1.21962	1.21962	0.01465	1.07354	1.07354	0.07439
orf19.5237	VPH2	Ortholog(s) have role in vacuolar acidification, vacuolar proton-transporting V-type ATPase complex assembly and endoplasmic reticulum membrane localization	1.21904	1.21904	0.11296	-1.16418	0.85898	0.02968
orf19.750	0	Protein of unknown function; exogenously expressed protein is a substrate for Kex2p processing in vitro	1.21891	1.21891	0.25539	-1.05465	0.94818	0.27946
orf19.7446	OPI3	Phosphatidylethanolamine N-methyltransferase; phosphatidylcholine biosynthesis; downregulation correlates with clinical development of fluconazole resistance; amphotericin B, caspofungin repressed; Hap43-induced; Spider biofilm repressed	1.21859	1.21859	0.34297	-1.23466	0.80994	0.13197
orf19.6517	RAD14	Putative DNA repair protein; transcription is regulated upon yeast-hyphal switch; flucytosine repressed	1.2178	1.2178	0.00241	1.03678	1.03678	0.34512
orf19.2351	NIT3	Putative nitrilase; regulated by Gcn2p and Gcn4p; protein present in exponential and stationary growth phase yeast cultures	1.21778	1.21778	0.30457	1.29569	1.29569	0.03433
orf19.4981	0	Ortholog(s) have endoplasmic reticulum localization	1.21762	1.21762	0.09606	-1.05067	0.95178	0.89511
orf19.2035	0	Ortholog of C. parapsilosis CDC317 : CPAR2_212930, C. dubliniensis CD36 : Cd36_15830, Candida orthopsilosis Co 90-125 : CORT_0A12240 and Candida tropicalis MYA-3404 : CTRG_01155	1.21762	1.21762	0.28454	1.14307	1.14307	0.08567
orf19.2863	0	Ortholog of C. dubliniensis CD36 : Cd36_28090, C. parapsilosis CDC317 : CPAR2_802560, Candida tenuis NRRL Y-1498 : CANTEDRAFT_104949 and Debaryomyces hansenii CBS767 : DEHA2A12848g	1.21746	1.21746	0.3673	1.00796	1.00796	0.8142
orf19.2460	0	Protein of unknown function; substrate for Kex2 processing in vitro; repressed by alpha pheromone in SpiderM medium; Spider biofilm induced; Bcr1-repressed in a/a RPMI biofilms	1.21714	1.21714	0.04027	1.26552	1.26552	0.14404
orf19.6793	0	Protein of unknown function; Sef1, Sfu1, and Hap43 regulated; rat catheter and Spider biofilm induced	1.21691	1.21691	0.38735	1.40939	1.40939	0.05928
orf19.5256	0	Protein of unknown function; Hap43-repressed gene; induced by alpha pheromone in SpiderM medium	1.21643	1.21643	0.35672	1.04119	1.04119	0.67999
orf19.1352	TIM22	Mitochondrial inner membrane protein; predicted role in protein import; Hap43-repressed gene; flow model biofilm induced; Spider biofilm repressed	1.21632	1.21632	0.25633	-1.01827	0.98206	0.5157
orf19.6529	CDC34	Putative ubiquitin-protein ligase; transcript regulated by Nrg1 and Tup1, and by Gcn2 and Gcn4; rat catheter biofilm induced	1.21621	1.21621	0.36025	1.01271	1.01271	0.46964
orf19.218	BUD20	Protein similar to S. cerevisiae Bud20p, which affects bud site selection; transposon mutation affects filamentous growth	1.21619	1.21619	0.2034	1.04404	1.04404	0.15589
orf19.1180	0	Putative 2-aminoadipate transaminase; rat catheter and Spider biofilm repressed	1.21617	1.21617	0.11798	-1.17731	0.8494	0.01815
orf19.1139	0	Protein of unknown funtion; S. cerevisiae ortholog Svl3 plays a role in endocytosis and is localized to the bud neck; Spider biofilm induced	1.21609	1.21609	0.28144	1.00631	1.00631	0.6735
orf19.5727	0	Ortholog of C. dubliniensis CD36 : Cd36_64130, C. parapsilosis CDC317 : CPAR2_601230, Candida tenuis NRRL Y-1498 : CANTEDRAFT_115908 and Debaryomyces hansenii CBS767 : DEHA2E12540g	1.21585	1.21585	0.9146	1.38312	1.38312	0.03545
orf19.6997	ATO5	Putative fungal-specific transmembrane protein	1.21563	1.21563	0.0442	1.22772	1.22772	0.10326
orf19.3232	0	Putative transporter; mutation confers hypersensitivity to toxic ergosterol analog; fungal-specific (no human or murine homolog)	1.2156	1.2156	0.42837	1.27911	1.27911	0.10173
orf19.2430	0	Ortholog of Candida albicans WO-1 : CAWG_00792	1.21489	1.21489	0.56764	1.05923	1.05923	0.60993
orf19.1923	RRN3	Protein with a predicted role in recruitment of RNA polymerase I to rDNA; caspofungin induced; flucytosine repressed; repressed in core stress response; repressed by prostaglandins	1.21488	1.21488	0.00509	1.11887	1.11887	0.02605
orf19.2803	HEM13	Coproporphyrinogen III oxidase; antigenic; on yeast cell surface, not hyphae; iron-regulated expression; Hap43, macrophage-repressed; farnesol-induced; possibly essential; flow model biofilm induced; rat catheter, Spider biofilm repressed	1.21472	1.21472	0.37999	-1.71247	0.58395	0.0016
orf19.6938	MEU1	Putative methylthioadenosine phosphorylase; protein level decreases in stationary phase cultures	1.21459	1.21459	0.19194	1.30232	1.30232	0.03418
orf19.440	SDH1	Putative mitochondrial succinate dehydrogenase; macrophage/pseudohyphal-induced; repressed by nitric oxide	1.21382	1.21382	0.48102	1.18185	1.18185	0.00032
orf19.7052	0	Putative polyphosphatidylinositol phosphatase; possibly an essential gene, disruptants not obtained by UAU1 method	1.21346	1.21346	0.22258	-1.11989	0.89295	0.28091
orf19.5663	RCH1	Plasma membrane protein; involved in regulation of cytosolic calcium homeostasis; null mutation confers sensitivity to calcium and resistance to azoles and terbinafine; rat catheter biofilm induced	1.21333	1.21333	0.86269	-1.1607	0.86155	0.17926
orf19.6225	PCL7	Putative cyclin-like protein; possible Pho85 cyclin; hyphal repressed; induced by Mnl1 under weak acid stress	1.21331	1.21331	0.33377	1.19495	1.19495	0.05718
orf19.3701	0	Protein of unknown function; mutants are viable; ortholog of S. cervisiae Art10, a protein of unknown function	1.21323	1.21323	0.15946	1.1488	1.1488	0.08949
orf19.6049	0	Ortholog(s) have protein kinase activator activity, role in protein phosphorylation, regulation of cytokinesis and chromosome passenger complex, kinetochore microtubule, spindle midzone localization	1.21295	1.21295	0.24179	-1.09032	0.91716	0.76581
orf19.3758	0	Ortholog(s) have fungal-type vacuole membrane localization	1.2129	1.2129	0.0267	-1.0604	0.94304	0.70628
orf19.1277	0	Protein of unknown function; Rgt1, Hap43-repressed; flow model biofilm induced; Spider biofilm induced	1.21289	1.21289	0.40438	-1.10527	0.90476	0.35653
orf19.6979	0	Ortholog(s) have role in cellular manganese ion homeostasis, mitochondrion organization and fungal-type vacuole membrane localization	1.21269	1.21269	0.25171	1.17327	1.17327	0.08585
orf19.4759	COX5	Cytochrome oxidase subunit V; putative upstream CCAAT box regulatory element; macrophage/pseudohyphal-induced; repressed by nitric oxide; intron in 5'-UTR; Hap43p-dependent repression in low iron medium	1.21248	1.21248	0.34129	1.13029	1.13029	0.14455
orf19.1746	0	Protein similar to S. cerevisiae meiosis-specific, spore-wall-localized protein Ssp2p, which is required for wild-type outer spore wall formation in S. cerevisiae; possibly an essential gene (UAU1 method); Hap43p-repressed	1.21234	1.21234	0.08765	1.25915	1.25915	0.00156
orf19.3845	FGR3	Protein lacking an ortholog in S. cerevisiae; transposon mutation affects filamentous growth	1.21229	1.21229	0.03867	1.05396	1.05396	0.10416
orf19.451	SOK1	Protein kinase required for degradation of Nrg1p; mutants are sensitive to growth on hydrogen peroxide medium; induced by alpha pheromone in SpiderM medium; rat catheter and Spider biofilm induced	1.21229	1.21229	0.31542	1.46731	1.46731	0.1349
orf19.2649	PCL1	Cyclin homolog; transcript induced by filamentous growth; induced by alpha pheromone in SpiderM medium	1.2122	1.2122	0.30776	1.17648	1.17648	0.33689
orf19.1589	0	Putative transcription factor component of the core factor (CF) rDNA transcription factor complex; Spider biofilm induced	1.21208	1.21208	0.02465	1.20468	1.20468	0.0055
orf19.3823	ZDS1	Nonessential protein; similar to S. cerevisiae Zds1p	1.21186	1.21186	0.92408	-1.08659	0.92031	0.25497
orf19.6168	0	Ortholog of C. dubliniensis CD36 : Cd36_80830, Debaryomyces hansenii CBS767 : DEHA2F17930g, Candida tropicalis MYA-3404 : CTRG_04030 and Candida lusitaniae ATCC 42720 : CLUG_04224	1.21155	1.21155	0.13214	1.122	1.122	0.22227
orf19.2304	0	Protein similar to S. cerevisiae Gvp36p; transposon mutation affects filamentous growth	1.21144	1.21144	0.31021	1.36428	1.36428	0.04107
orf19.7281	PDK2	Putative pyruvate dehydrogenase kinase; mutation confers hypersensitivity to amphotericin B	1.21105	1.21105	0.24645	1.8041	1.8041	0.05859
orf19.1567	0	Ortholog(s) have Rab guanyl-nucleotide exchange factor activity, phosphatidylinositol binding activity	1.21061	1.21061	0.66015	1.05099	1.05099	0.11775
orf19.5653	ATP2	F1 beta subunit of F1F0 ATPase complex; antigenic in human, mice; induced by ciclopirox olamine; caspofungin repressed; macrophage/pseudohyphal-induced; detected during exponential and stationary growth phases; Spider biofilm repressed	1.21061	1.21061	0.13595	1.20947	1.20947	0.04484
orf19.7269	0	Putative polyamine acetyltransferase; acetylates polyamines (e.g. putrescine, spermidine, spermine) and aralkylamines (e.g. tryptamine, phenylethylamine); Spider biofilm repressed	1.21033	1.21033	0.46886	-1.07186	0.93296	0.29031
orf19.2231	0	Protein of unknown function; Spider biofilm induced	1.21015	1.21015	0.71877	1.28848	1.28848	0.03444
orf19.3785	0	DnaJ chaperone domain protein; role in pre-mRNA splicing; Spider biofilm induced	1.20992	1.20992	0.61327	1.19745	1.19745	0.15066
orf19.3633	0	Ortholog(s) have role in purine nucleobase catabolic process and cytosol, nucleus localization	1.20987	1.20987	0.12665	1.04758	1.04758	0.99706
orf19.4934	OP4	Ala- Leu- and Ser-rich protein; secreted; N-terminal hydrophobic region; possible glycosylation; opaque-specific transcript; repressed by alpha pheromone in opaque MTLa homozygotes; fluconazole-induced; Spider biofilm induced	1.20908	1.20908	0.01033	1.25695	1.25695
orf19.1698	0	Ortholog(s) have phosphatidate phosphatase activity, role in actin cytoskeleton organization, cellular lipid metabolic process and actin cortical patch localization	1.20874	1.20874	0.54536	1.07328	1.07328	0.19415
orf19.6350	0	Ortholog of C. dubliniensis CD36 : Cd36_11890 and Candida albicans WO-1 : CAWG_00170	1.20873	1.20873	0.29701	1.53559	1.53559	0.00402
orf19.5714	SAP1	Secreted aspartyl proteinase; acts in utilization of protein as nitrogen source; assessment of virulence role complicated by URA3 effects; regulated by growth phase, alpha-pheromone; produced by opaque cells	1.20868	1.20868	0.20698	-1.05301	0.94966	0.03868
orf19.7119	RAD3	Ortholog of S. cerevisiae Rad3; 5' to 3' DNA helicase, nucleotide excision repair and transcription, subunit of RNA polII initiation factor TFIIH and Nucleotide Excision Repair Factor 3 (NEF3)	1.20819	1.20819	0.43554	1.30988	1.30988	0.31237
orf19.7388	PBS2	MAPK kinase (MAPKK); role in osmotic and oxidative stress responses, oxidative stress adaptation; required for stress regulation of Hog1p localization and activity; functional homolog of S. cerevisiae Pbs2p	1.20818	1.20818	0.66613	1.04383	1.04383	0.58132
orf19.4677	0	Putative protein of unknown function, transcript is upregulated in clinical isolates from HIV+ patients with oral candidiasis; Spider biofilm induced	1.20797	1.20797	0.16477	-1.04745	0.9547	0.47036
orf19.3666	0	Predicted debranching enzyme-associated ribonuclease; rat catheter biofilm induced	1.20794	1.20794	0.19371	1.27238	1.27238	0.0042
orf19.5718	0	Has domain(s) with predicted zinc ion binding activity and role in intracellular protein transport, vesicle-mediated transport	1.20793	1.20793	0.03198	1.02807	1.02807	0.80046
orf19.1789.1	LYS1	Saccharopine dehydrogenase (biosynthetic); enzyme of alpha-aminoadipate lysine biosynthesis pathway; functionally complements S. cerevisiae lys1 mutation; fungal-specific (no human or murine homolog)	1.20793	1.20793	0.21406	1.23058	1.23058	0.06813
orf19.4332	0	Ortholog of C. dubliniensis CD36 : Cd36_52800, C. parapsilosis CDC317 : CPAR2_303110, Candida tenuis NRRL Y-1498 : CANTEDRAFT_92321 and Debaryomyces hansenii CBS767 : DEHA2G07964g	1.20765	1.20765	0.0936	-1.24533	0.803	0.08546
orf19.2952	EXG2	GPI-anchored cell wall protein, similar to S. cerevisiae exo-1,3-beta-glucosidase Exg2p; predicted Kex2p substrate; induced during cell wall regeneration; possibly an essential gene, disruptants not obtained by UAU1 method; Hap43p-repressed	1.20738	1.20738	0.15645	1.25188	1.25188	0.00139
orf19.6998	GTT1	Putative glutathione S-transferase; downregulated upon adherence to polystyrene; regulated upon white-opaque switching; induced in the presence of human neutrophils; oxidative stress-induced via Cap1p; regulated by Gcn2p, Gcn4p	1.20736	1.20736	0.00578	1.1376	1.1376	0.02779
orf19.6754	0	Protein of unknown function; Spider biofilm induced	1.20718	1.20718	0.0334	1.11847	1.11847	0.28172
orf19.5197	APE2	Neutral arginine, alanine, leucine specific metallo-aminopeptidase; purified from cell wall/intracellular fractions; protein repressed during mating; Hog1, farnesol-induced; may be essential (UAU1 method); rat catheter biofilm repressed	1.2069	1.2069	0.37889	1.22934	1.22934	0.0928
orf19.4736	0	Ortholog(s) have alkaline phosphatase activity and role in cellular response to cadmium ion, detoxification of cadmium ion, nicotinamide nucleotide metabolic process, protein dephosphorylation	1.20667	1.20667	0.47516	-1.10143	0.90791	0.12076
orf19.413.1	RPS27A	Ribosomal protein S27; rat catheter and Spider biofilm induced	1.2064	1.2064	0.29011	1.4111	1.4111	0.02406
orf19.5445	GLO3	Putative ARF GTPase activator; role in COPI coating of Golgi vesicle, ER to Golgi vesicle-mediated transport, retrograde Golgi to ER vesicle-mediated transport; Spider biofilm repressed	1.20632	1.20632	0.1519	1.00337	1.00337	0.95802
orf19.1538	TLG2	Putative syntaxin-like t-SNARE; macrophage/pseudohyphal-repressed	1.20624	1.20624	0.09052	-1.01842	0.98191	0.74143
orf19.6763	SLK19	Alkaline-induced protein of plasma membrane; affects cell aggregation, cell wall; similar to S. cerevisiae Slk19p (a kinetochore protein with roles in mitosis, meiosis); required for wild-type virulence in mouse; macrophage-downregulated	1.2061	1.2061	0.11805	1.01411	1.01411	0.52559
orf19.6026	ERG2	C-8 sterol isomerase; enzyme of ergosterol biosynthesis; converts fecosterol to episterol; mutant is hypersensitive to multiple drugs; ketoconazole-induced; flow model and Spider biofilm repressed	1.2061	1.2061	0.1623	1.381	1.381	0.16739
orf19.905	AVT7	Ortholog of S. cerevisiae Avt7 transporter; repressed upon adherence to polystyrene; constitutive expression independent of MTL or white-opaque status; Spider biofilm induced	1.206	1.206	0.10803	1.23347	1.23347	0.02801
orf19.1386	0	Ortholog(s) have SNAP receptor activity and role in ER to Golgi vesicle-mediated transport, retrograde vesicle-mediated transport, Golgi to ER, vesicle fusion	1.20597	1.20597	0.98834	1.03153	1.03153	0.8635
orf19.2879	IFF5	Putative GPI-anchored protein; adhesin-like protein; possibly an essential gene, disruptants not obtained by UAU1 method	1.20579	1.20579	0.06528	1.01583	1.01583	0.81741
orf19.6341	0	Ortholog(s) have 5-amino-6-(5-phosphoribosylamino)uracil reductase activity, role in riboflavin biosynthetic process and cytosol, nucleus localization	1.20568	1.20568	0.75813	1.38692	1.38692	0.02772
orf19.6703	0	Ortholog of C. dubliniensis CD36 : Cd36_73260 and Candida albicans WO-1 : CAWG_05699	1.20538	1.20538	0.17028	1.07844	1.07844	0.42977
orf19.3269	GSL2	Protein similar to beta-1,3-glucan synthase; 16 predicted membrane-spanning regions; transcript regulated by Nrg1; very low gene expression in yeast-form and hyphal cells	1.20528	1.20528	0.2446	1.17067	1.17067	0.38313
orf19.4602	MDH1-1	Predicted malate dehydrogenase precursor; macrophage-induced transcript; protein present in exponential and stationary growth phase yeast cultures; Spider biofilm repressed	1.20471	1.20471	0.29491	1.45922	1.45922	0.04944
orf19.4328	CCC2	Copper-transporting P-type ATPase of Golgi; required for wild-type iron assimilation (indirect effect via Fet3p); induced by iron starvation, ciclopirox olamine; caspofungin repressed; not required for virulence in mouse systemic infection	1.20447	1.20447	0.1525	1.31532	1.31532	0.07043
orf19.7022	0	Ortholog of C. dubliniensis CD36 : Cd36_70850, Candida tenuis NRRL Y-1498 : cten_CGOB_00183, Debaryomyces hansenii CBS767 : DEHA2F22462g and Pichia stipitis Pignal : PICST_60416	1.20427	1.20427	0.06315	1.08171	1.08171	0.2328
orf19.4764	0	Ortholog(s) have poly(A)-specific ribonuclease activity, role in mRNA 3'-end processing, postreplication repair and PAN complex localization	1.20426	1.20426	0.12345	1.24428	1.24428	0.01551
orf19.5244	MCD4	Protein of major facilitator superfamily; has phosphodiesterase/nucleotide pyrophosphatase domain; similar to S. cerevisiae Mcd4p, which acts in GPI anchor biosynthesis; possibly an essential gene, disruptants not obtained by UAU1 method	1.2041	1.2041	0.15417	-1.1644	0.85881	0.15684
orf19.2252	0	Protein of unknown function; rat catheter biofilm repressed	1.20402	1.20402	0.14367	1.39018	1.39018	0.07394
orf19.1376	SSO2	Plasma membrane t-SNARE; involved in fusion of secretory vesicles at the plasma membrane	1.2038	1.2038	0.31604	1.26991	1.26991	0.09622
orf19.653	0	Dubious open reading frame	1.20378	1.20378	0.09886	1.24109	1.24109	0.01985
orf19.2616	UGT51C1	UDP-glucose:sterol glucosyltransferase; enzyme of sterol glucoside (membrane-bound lipid) biosynthesis; has UDP-sugar binding domain; activity is UDP-glucose-specific in vitro; enzyme does not use UDP-mannose; Mig1-regulated	1.20365	1.20365	0.03854	1.13191	1.13191	0.41176
orf19.7272	0	Protein of unknown function; transcript detected on high-resolution tiling arrays	1.20351	1.20351	0.22541	-1.18302	0.84529	0.37967
orf19.1082.1	0	Ortholog(s) have cytochrome-c oxidase activity, role in mitochondrial respiratory chain complex IV assembly and cytosol, mitochondrial intermembrane space, mitochondrial respiratory chain complex IV, nucleus localization	1.20313	1.20313	0.37945	1.37434	1.37434	0.01494
orf19.5110	OPY2	Predicted transmembrane protein; role in cell wall biogenesis; required for Cek1 phosphorylation; Spider biofilm induced	1.20311	1.20311	0.7111	1.22752	1.22752	0.27795
orf19.4589	0	Ortholog(s) have polyamine oxidase activity, role in pantothenate biosynthetic process, polyamine catabolic process and cytoplasm localization	1.20304	1.20304	0.08778	1.49693	1.49693	0.01158
orf19.4286	0	Protein of unknown function; flow model biofilm induced; Spider biofilm induced	1.20292	1.20292	0.55717	1.08631	1.08631	0.11404
orf19.3369	MOH1	Ortholog of S. cerevisiae Moh1, essential for staionary phase growth; induced by alpha pheromone in SpiderM medium and by Mnl1 under weak acid stress; possibly essential (UAU1 method); flow model biofilm induced; Spider biofilm induced	1.20282	1.20282	0.35254	1.09761	1.09761	0.37616
orf19.305	0	Protein of unknown function; upregulated in a cyr1 null mutant	1.20172	1.20172	0.23077	1.23476	1.23476	0.03817
orf19.3841	0	Putative protein serine/threonine kinase; predicted role in vesicle formation in autophagy and the cytoplasm-to-vacuole targeting (Cvt) pathway; Spider biofilm induced	1.20139	1.20139	0.40866	1.36547	1.36547	0.03643
orf19.233.1	HRT1	Ortholog of S. cerevisiae Hrt1; component of a nuclear ubiquitin-protein ligase complex involved in cell cycle control; induced by hydroxyurea; Spider biofilm induced	1.20112	1.20112	0.25353	1.216	1.216	0.03253
orf19.6286	0	Ortholog(s) have role in vacuolar transport and endosome localization	1.20084	1.20084	0.00094	1.06396	1.06396	0.50545
orf19.7278	0	Similar to a region of the Tca2 (pCal) retrotransposon, which is present in strain hOG1042 as 50 to 100 copies of a linear dsDNA; rat catheter biofilm repressed	1.20035	1.20035	0.41261	-2.04605	0.48875	0.16748
orf19.477	0	Ortholog(s) have role in mitochondrial translation and mitochondrion localization	1.20016	1.20016	0.02801	1.07771	1.07771	0.14793
orf19.3245	0	Ortholog of C. dubliniensis CD36 : Cd36_26090, C. parapsilosis CDC317 : CPAR2_801510, Candida tenuis NRRL Y-1498 : CANTEDRAFT_137093 and Debaryomyces hansenii CBS767 : DEHA2F20548g	1.19933	1.19933	0.88982	1.27653	1.27653	0.1016
orf19.3187	ZNC1	Zn(2)-Cys(6) transcription factor; regulated by Gcn2 and Gcn4; gene located in zinc cluster region of Chromosome 5, near the MTL locus; required for yeast cell adherence to silicone substrate; Spider biofilm induced	1.19919	1.19919	0.053	1.23976	1.23976	0.03119
orf19.2510	0	Ortholog(s) have role in protein folding, tubulin complex assembly	1.19862	1.19862	0.31482	1.09399	1.09399	0.03751
orf19.930	PET9	Mitochondrial ADP/ATP carrier protein involved in ATP biosynthesis; possible lipid raft component; 3 predicted transmembrane helices; flucytosine induced; ketoconazole-induced; downregulated by Efg1p	1.19854	1.19854	0.29756	1.57044	1.57044	0.0144
orf19.4407	0	Protein of unknown function; Hap43-repressed gene	1.19848	1.19848	0.39235	-1.56006	0.641	0.11923
orf19.7187	MAM33	Putative mitochondrial acidic matrix protein; regulated by Ssn6p; protein present in exponential and stationary growth phase yeast cultures	1.19846	1.19846	0.18814	1.59027	1.59027	0.02963
orf19.1499	CTF1	Putative zinc-finger transcription factor, similar to A. nidulans FarA and FarB; activates genes required for fatty acid degradation; induced by oleate; null mutant displays carbon source utilization defects and slightly reduced virulence	1.19827	1.19827	0.48791	-1.03634	0.96493	0.86495
orf19.3093	MSH2	Putative DNA mismatch repair factor; transcript regulated by Nrg1; flucytosine repressed; transcript regulated by tyrosol and cell density	1.19827	1.19827	0.1881	1.73171	1.73171	0.00894
orf19.7578	0	Ortholog(s) have oligosaccharide binding activity, role in ER-associated ubiquitin-dependent protein catabolic process and Hrd1p ubiquitin ligase ERAD-L complex, luminal surveillance complex localization	1.1981	1.1981	0.07231	1.12655	1.12655	0.10477
orf19.1595	0	Ortholog(s) have Dsc E3 ubiquitin ligase complex, endoplasmic reticulum localization	1.19807	1.19807	0.14653	1.01908	1.01908	0.60993
orf19.5530	NAB3	Putative nuclear polyadenylated RNA-binding protein; flucytosine repressed	1.19779	1.19779	0.31175	-1.08681	0.92012	0.77715
orf19.5543	0	Ortholog(s) have cell division site, cytosol localization	1.19774	1.19774	0.16495	1.01497	1.01497	0.3594
orf19.4427	SKP1	Putative subunit D of kinetochore protein complex CBF3; regulated by Gcn4p; repressed in response to amino acid starvation (3-aminotriazole treatment)	1.19748	1.19748	0.45628	1.03572	1.03572	0.35687
orf19.2280	ZCF10	Putative transcription factor with zinc cluster DNA-binding motif	1.19737	1.19737	0.22112	-1.14044	0.87685	0.32997
orf19.5875	VAM3	Predicted target membrane receptor (t-SNARE) involved in vacuolar transport, endocytosis, and secretion; required for biofilm formation in RPMI-1640 and for virulence; rat catheter biofilm repressed	1.19724	1.19724	0.36734	1.03529	1.03529	0.14472
orf19.6926	CSC25	Guanyl-nucleotide exchange factor; activator of Ras/adenylyl cyclase pathway; functional homolog of S. cerevisiae Cdc25p; commonly called Cdc25; transposon mutation affects filamentous growth	1.19702	1.19702	0.04183	1.08856	1.08856	0.17448
orf19.5348	TPS3	Predicted trehalose-phosphate synthase regulatory subunit; regulated by Efg1; regulated by Tsa1, Tsa1B under H2O2 stress conditions; flow model biofilm induced (reports differ)	1.19683	1.19683	0.42146	1.14199	1.14199	0.55072
orf19.1840	0	Predicted lipid-binding ER protein; involved in ER-plasma membrane tethering; Spider biofilm induced	1.19676	1.19676	0.26654	1.18393	1.18393	0.10191
orf19.6114	0	Protein of unknown function; transcript detected on high-resolution tiling arrays	1.19568	1.19568	0.50972	-1.16862	0.85571	0.122
orf19.6832	0	Protein of unknown function; regulated by Sef1p-, Sfu1p-, and Hap43p	1.19494	1.19494	0.01304	1.01755	1.01755	0.99958
orf19.2933	0	Ortholog(s) have ubiquitin-specific protease activity, role in protein deubiquitination, regulation of transcription, DNA-dependent and cytosol, nucleus localization	1.1948	1.1948	0.99068	1.1242	1.1242	0.00684
orf19.3505	0	Ortholog(s) have role in TOR signaling cascade, actin filament bundle assembly, eisosome assembly, endosomal transport, establishment or maintenance of actin cytoskeleton polarity, regulation of cell growth	1.19454	1.19454	0.35369	1.06179	1.06179	0.42096
orf19.2459	0	Protein of unknown function; mRNA binds to She3; Hap43 repressed gene; Spider biofilm induced	1.1941	1.1941	0.17928	1.07911	1.07911	0.14674
orf19.6860	0	Ortholog(s) have CDP-diacylglycerol-inositol 3-phosphatidyltransferase activity, role in phosphatidylinositol biosynthetic process and Golgi apparatus, integral to membrane, mitochondrial outer membrane localization	1.19396	1.19396	0.33544	1.22001	1.22001	0.00465
orf19.6419.1	0	Ortholog of C. parapsilosis CDC317 : CPAR2_205710, Candida tenuis NRRL Y-1498 : CANTEDRAFT_117073, Lodderomyces elongisporus NRLL YB-4239 : LELG_02945 and Debaryomyces hansenii CBS767 : DEHA2A11462g	1.19394	1.19394	0.96574	-1.10949	0.90131	0.163
orf19.1783	YOR1	Protein similar to S. cerevisiae Yor1; ABC-type plasma membrane transporter involved in resistance to aureobasidin A; white cell type-specific transcript; Spider biofilm induced	1.19362	1.19362	0.08888	1.04926	1.04926	0.05703
orf19.2277	TPK2	cAMP-dependent protein kinase catalytic subunit; isoform of Tpk1; needed for epithelial cell damage, engulfment and oral (not systemic) virulence in mice; control of morphogenesis and stress response; rat catheter, Spider biofilm repressed	1.19357	1.19357	0.21128	1.11502	1.11502	0.0934
orf19.7648	0	Has domain(s) with predicted antiporter activity, drug transmembrane transporter activity, role in drug transmembrane transport and membrane localization	1.19316	1.19316	0.12758	1.04256	1.04256	0.32823
orf19.5627	0	S. cerevisiae ortholog Hek2/Khd1 is a putative RNA binding protein involved in the asymmetric localization of ASH1 mRNA; Hap43-induced gene	1.19301	1.19301	0.28815	1.28882	1.28882	0.42468
orf19.1283	MEC1	Cell cycle checkpoint protein with a role in genome integrity; RNA abundance regulated by tyrosol and cell density	1.19286	1.19286	0.11907	1.00283	1.00283	0.52831
orf19.264	0	Has domain(s) with predicted protein kinase binding activity and role in regulation of cyclin-dependent protein serine/threonine kinase activity	1.19275	1.19275	0.3202	1.1502	1.1502	0.14855
orf19.7002	0	Ortholog of C. parapsilosis CDC317 : CPAR2_806990, Candida tenuis NRRL Y-1498 : CANTEDRAFT_122709, Debaryomyces hansenii CBS767 : DEHA2E00110g and Pichia stipitis Pignal : PICST_30109	1.19261	1.19261	0.44154	1.28417	1.28417	0.0889
orf19.2758	PGA38	Putative adhesin-like GPI-anchored protein; repressed during cell wall regeneration; possibly an essential gene, disruptants not obtained by UAU1 method; rat catheter and Spider biofilm repressed	1.19237	1.19237	0.38447	1.14354	1.14354	0.25999
orf19.1542	HEX3	Protein similar to S. cerevisiae Hex3p, which is involved in DNA damage response; transposon mutation affects filamentous growth	1.19217	1.19217	0.25893	1.13042	1.13042	0.14538
orf19.3496	CHC1	Clathrin heavy chain; subunit of the major coat protein; role in intracellular protein transport and endocytosis; flow model and rat catheter biofilm repressed	1.19214	1.19214	0.35029	-1.16904	0.8554	0.0994
orf19.2005	REG1	Putative protein phosphatase regulatory subunit; Hap43-repressed gene; macrophage/pseudohyphal-induced; possibly regulated upon hyphal formation; flow model biofilm induced	1.19187	1.19187	0.53836	1.25513	1.25513	0.18724
orf19.2575	0	Putative S-adenosylmethionine-dependent methyltransferase; Hap43p-induced gene	1.19174	1.19174	0.62162	1.28018	1.28018	0.03159
orf19.3323	0	Ortholog of C. dubliniensis CD36 : Cd36_01240, C. parapsilosis CDC317 : CPAR2_109140, Candida tenuis NRRL Y-1498 : CANTEDRAFT_114227 and Debaryomyces hansenii CBS767 : DEHA2D15026g	1.19173	1.19173	0.29177	1.20194	1.20194	0.05072
orf19.3977	0	Protein with a role in translation; flow model biofilm repressed	1.19149	1.19149	0.05013	-1.01359	0.98659	0.63724
orf19.5446	0	Putative protein of unknown function; transcript is upregulated in clinical isolates from HIV+ patients with oral candidiasis; regulated by Ssn6	1.19138	1.19138	0.43941	1.07321	1.07321	0.54024
orf19.1338	0	Protein of unknown function; possible COPI-coated vesicle, Golgi apparatus, ribosome localization; rat catheter biofilm repressed	1.19135	1.19135	0.27293	1.13546	1.13546	0.01662
orf19.438	0	Ortholog of S. cerevisiae : YHR078W, C. glabrata CBS138 : CAGL0J10626g, C. dubliniensis CD36 : Cd36_05020, Candida tenuis NRRL Y-1498 : CANTEDRAFT_95811 and Debaryomyces hansenii CBS767 : DEHA2E07524g	1.19113	1.19113	0.48096	1.02115	1.02115	0.24723
orf19.3414	SUR7	Protein required for normal cell wall, plasma membrane, cytoskeletal organization, endocytosis; localizes to eisosome subdomains of plasma membrane; four transmembrane motifs; mutant shows ectopic, chitin-rich cell wall; fluconazole-induced	1.19098	1.19098	0.29945	1.28468	1.28468	0.05866
orf19.5752	0	Ortholog(s) have ubiquitin-protein ligase activity, role in SCF-dependent proteasomal ubiquitin-dependent protein catabolic process and SCF ubiquitin ligase complex localization	1.19059	1.19059	0.06305	1.45811	1.45811	0.00479
orf19.5520	ASG7	a-cell specific protein of unknown function; two predicted transmembrane domains; member of conserved Mcm1 regulon; induced by alpha pheromone in SpiderM medium	1.19057	1.19057	0.06301	1.19172	1.19172	0.29873
orf19.6055	0	Ortholog of C. dubliniensis CD36 : Cd36_00460, C. parapsilosis CDC317 : CPAR2_800010, Candida tenuis NRRL Y-1498 : CANTEDRAFT_125085 and Debaryomyces hansenii CBS767 : DEHA2D09086g	1.19049	1.19049	0.72521	-1.13005	0.88492	0.23552
orf19.2862	RIB1	Putative GTP cyclohydrolase II; enzyme of riboflavin biosynthesis; fungal-specific (no human or murine homolog); regulated by Sef1p-, Sfu1p-, and Hap43p	1.18974	1.18974	0.04841	-1.00391	0.99611	0.3931
orf19.4535	PTR3	Protein similar to S. cerevisiae Ptr3p, which is a sensor of external amino acids; expression upregulated in an ssr1 null mutant	1.18962	1.18962	0.03445	1.22373	1.22373	0.1252
orf19.1681	0	Ortholog of C. dubliniensis CD36 : Cd36_81530, C. parapsilosis CDC317 : CPAR2_503590, Candida tenuis NRRL Y-1498 : CANTEDRAFT_115755 and Debaryomyces hansenii CBS767 : DEHA2D15334g	1.18958	1.18958	0.77842	1.05864	1.05864	0.77682
orf19.7125	0	Protein of unknown function; Spider biofilm repressed	1.18957	1.18957	0.01882	-1.3701	0.72987	0.30789
orf19.6570	NUP	Nucleoside permease; adenosine and guanosine are substrates, whereas cytidine, adenine, guanine, uridine, uracil are not; similar to a nucleoside permease of S. pombe; possibly processed by Kex2p	1.18946	1.18946	0.17546	1.94464	1.94464	0.19783
orf19.4975	HYR1	GPI-anchored hyphal cell wall protein; macrophage-induced; repressed by neutrophils; resistance to killing by neutrophils, azoles; regulated by Rfg1, Efg1, Nrg1, Tup1, Cyr1, Bcr1, Hap43; Spider and flow model biofilm induced	1.18907	1.18907	0.07641	1.14404	1.14404	0.13745
orf19.4187	0	Ortholog(s) have role in hyphal growth, mitochondrial genome maintenance, phospholipid transport, protein import into mitochondrial outer membrane, sporocarp development involved in sexual reproduction	1.1889	1.1889	0.01373	1.14581	1.14581	0.04551
orf19.5271	0	Protein of unknown function; Hap43-induced gene	1.18839	1.18839	0.1916	1.09883	1.09883	0.40089
orf19.3184	0	Ortholog(s) have Golgi apparatus, fungal-type vacuole membrane localization	1.18829	1.18829	0.03796	1.18529	1.18529	0.02793
orf19.5170	ENA21	Predicted P-type ATPase sodium pump; Gcn4p-regulated; flucytosine, amphotericin B, or ketoconazole-induced; osmotic stress-induced; overlaps orf19.5170.1, which is annotated as a blocked reading frame; Spider biofilm induced	1.18782	1.18782	0.30618	1.24908	1.24908	0.12864
orf19.271	ADH4	Predicted 3-hydroxyacyl-CoA dehydrogenase; transcript is increased in azole-resistant strain overexpressing MDR1; transcript is increased in populations of cells exposed to fluconazole over multiple generations; mutant is viable	1.18741	1.18741	0.08839	-1.01852	0.98182	0.00757
orf19.6235	0	Protein of unknown function; Spider biofilm induced	1.18661	1.18661	0.24948	1.28178	1.28178	0.06293
orf19.6509	0	Ortholog(s) have role in cellular response to zinc ion and cytosol, nucleus localization	1.18659	1.18659	0.2148	-1.17477	0.85123	0.10336
orf19.6092	KEL1	Kelch repeat domain-containing protein; localizes to sites of polarized growth; mutant colonies exhibit slightly decreased filamentation ratio; not required for buccal epithelial cell adherence or virulence in mice	1.18627	1.18627	0.15723	-1.05882	0.94445	0.33043
orf19.2016	ERG28	Ortholog(s) have protein binding, bridging activity, role in ergosterol biosynthetic process and endoplasmic reticulum membrane localization	1.18622	1.18622	0.15382	1.34816	1.34816	0.00313
orf19.1504	0	Putative patatin-like phospholipase; fungal-specific (no human or murine homolog)	1.18617	1.18617	0.19373	1.09501	1.09501	0.44014
orf19.2784	0	Ortholog of C. dubliniensis CD36 : Cd36_07090, Candida tenuis NRRL Y-1498 : cten_CGOB_00237, Debaryomyces hansenii CBS767 : DEHA2F25542g and Pichia stipitis Pignal : psti_CGOB_00186	1.18617	1.18617	0.27478	1.11935	1.11935	0.18931
orf19.757	0	Ortholog of S. cerevisiae : YPR089W, C. glabrata CBS138 : CAGL0K08008g, C. dubliniensis CD36 : Cd36_04600, C. parapsilosis CDC317 : CPAR2_105630 and Candida tenuis NRRL Y-1498 : CANTEDRAFT_129373	1.1858	1.1858	0.229	1.20776	1.20776	0.0323
orf19.3158	0	Ortholog(s) have cytoplasm localization	1.18561	1.18561	0.50238	-1.0455	0.95648	0.23978
orf19.1824	PGA50	Putative GPI-anchored protein; adhesin-like protein	1.18558	1.18558	0.06727	1.27405	1.27405	0.01285
orf19.7652	CKA1	Putative alpha subunit (catalytic subunit) of protein kinase CK2; Cka1p and Cka2p have a common target with respect to fluconazole resistance; synthetically lethal with CKA2; flucytosine induced	1.18551	1.18551	0.14516	1.44295	1.44295	0.01125
orf19.4115	0	Ortholog of Candida albicans WO-1 : CAWG_04349	1.18525	1.18525	0.01079	-1.11971	0.89308	0.25039
orf19.3456	0	Protein with a predicted serine/threonine kinase and tyrosine kinase domain; possibly an essential gene, disruptants not obtained by UAU1 method	1.18521	1.18521	0.82308	1.32808	1.32808	0.0396
orf19.2751	0	Predicted membrane transporter; member of the monocarboxylate porter (MCP) family, major facilitator superfamily; Hap43-induced gene; alkaline upregulated by Rim101; possibly an essential gene, disruptants not obtained by UAU1 method	1.18473	1.18473	0.02116	1.23941	1.23941	0.0021
orf19.3710	YHB5	Flavohemoglobin-related protein; not required for normal NO resistance; predicted globin/FAD-binding/NAD(P)-binding domains but lacks some conserved residues of flavohemoglobins; filament induced; rat catheter and Spider biofilm induced	1.18454	1.18454	0.81067	1.48092	1.48092	0.05197
orf19.3728	0	Ortholog(s) have protein phosphatase 1 binding, protein phosphatase type 1 regulator activity, role in chromosome segregation, regulation of phosphoprotein phosphatase activity and cytoplasm localization	1.18425	1.18425	0.01707	1.09401	1.09401	0.11045
orf19.182	0	Ortholog(s) have rRNA (guanine-N1-)-methyltransferase activity, role in rRNA modification and endoplasmic reticulum, mitochondrion localization	1.18415	1.18415	0.23363	-1.01182	0.98832	0.4097
orf19.2994	RPL13	Putative ribosomal subunit; antigenic during murine infection; downregulated upon phagocytosis by murine macrophage; Spider biofilm repressed	1.18415	1.18415	0.15782	1.00576	1.00576	0.70641
orf19.4982	0	Has domain(s) with predicted role in lipid metabolic process	1.18356	1.18356	0.26419	-1.30729	0.76494	0.02867
orf19.3088	0	bZIP transcription factor; possibly transcriptionally regulated upon hyphal formation; Hap43; F-12/CO2 early biofilm induced; Spider biofilm induced	1.18324	1.18324	0.46244	1.02822	1.02822	0.85393
orf19.3422	FMP27	Putative mitochondrial protein; mRNA binds She3	1.18319	1.18319	0.03663	-1.39038	0.71923	0.00499
orf19.5968	RDI1	Putative rho GDP dissociation inhibitor; transposon mutation affects filamentous growth; farnesol, filament-induced; regulated by Nrg1, Tup1; protein levels low in stationary phase yeast	1.18303	1.18303	0.05756	1.2224	1.2224	0.02447
orf19.6913	GCN2	Translation initiation factor 2-alpha (eIF2alpha) kinase; has nonessential role in amino acid starvation response, in contrast to S. cerevisiae homolog; similar to S. cerevisiae Gcn2p	1.18298	1.18298	0.01413	1.02814	1.02814	0.21804
orf19.7158	0	Protein of allantoate permease family; fungal-specific (no human or murine homolog); Hap43p-repressed gene	1.1829	1.1829	0.4521	1.02376	1.02376	0.57789
orf19.6449	0	Ortholog of C. dubliniensis CD36 : Cd36_34310	1.18272	1.18272	0.27159	1.03019	1.03019	0.21101
orf19.2495	GSL1	Beta-1,3-glucan synthase subunit; 10 predicted transmembrane regions; caspofungin induced; repressed by yeast-to-hypha transition; young biofilm repressed, induced by biofilm drug exposure; Bcr1-repressed in RPMI a/a biofilms	1.18232	1.18232	0.15907	1.09602	1.09602	0.0312
orf19.4601	0	Putative RNA polymerase III transcription initiation factor complex (TFIIIC) subunit; possibly an essential gene, disruptants not obtained by UAU1 method	1.18178	1.18178	0.81074	1.27076	1.27076	0.04495
orf19.6587	GIR2	Ortholog of S. cerevisiae Gir2; transposon mutation affects filamentous growth	1.18173	1.18173	0.34728	1.00383	1.00383	0.74972
orf19.3671	0	Dubious open reading frame	1.18165	1.18165	0.19081	1.0436	1.0436	0.35218
orf19.1920	0	Ortholog of C. dubliniensis CD36 : Cd36_15040	1.18152	1.18152	0.04319	1.10592	1.10592	0.64436
orf19.3128	0	Ortholog(s) have syntaxin binding activity and role in ER to Golgi vesicle-mediated transport, positive regulation of SNARE complex assembly, retrograde vesicle-mediated transport, Golgi to ER, vesicle fusion with Golgi apparatus	1.18151	1.18151	0.0024	1.06818	1.06818	0.19008
orf19.4465	0	Protein of unknown function; Spider biofilm induced	1.18	1.18	0.64093	1.14119	1.14119	0.04813
orf19.3254	0	Ortholog of C. dubliniensis CD36 : Cd36_26020, Candida tropicalis MYA-3404 : CTRG_00984 and Candida albicans WO-1 : CAWG_01455	1.1797	1.1797	0.83848	1.05468	1.05468	0.71883
orf19.5438	0	Putative ubiquitin-protein ligase; role in protein sumoylation, protein ubiquitination; Spider biofilm induced	1.17943	1.17943	0.07316	-1.23275	0.8112	0.05837
orf19.3517	0	Ortholog(s) have Dsc E3 ubiquitin ligase complex, endoplasmic reticulum, fungal-type vacuole lumen localization	1.17923	1.17923	0.821	1.20604	1.20604	0.08319
orf19.7069	0	Putative AdoMet-dependent proline methyltransferase; Hap43-induced; required for normal flow model biofilm growth; Spider biofilm repressed	1.17903	1.17903	0.67041	1.66948	1.66948	0.27172
orf19.6729	TIP120	Protein similar to human CAND1 (Cullin-Associated Nedd8-Dissociated) protein involved in regulation of SCF complexes; binds unnedddylated cullin Cdc53; mutants are viable	1.17891	1.17891	0.30644	1.01785	1.01785	0.45913
orf19.3748	0	Protein of unknown function; orf19.3747 and orf19.3748 are short, overlapping ORFs in intergenic region between 2 oligopeptide transporter-encoding genes; flow model biofilm induced	1.17876	1.17876	0.33911	-1.16026	0.86188	0.29793
orf19.672	0	Ortholog(s) have U5 snRNP localization	1.17865	1.17865	0.31941	1.09387	1.09387	0.21161
orf19.5908	TEC1	TEA/ATTS transcription factor; white cell pheromone response, hyphal gene regulation; required for Spider and RPMI biofilm formation; regulates BCR1; Cph2 regulated transcript; alkaline, rat catheter, Spider, flow model biofilm induced	1.1784	1.1784	0.22281	1.21556	1.21556	0.27323
orf19.3844	MRP8	Mitochondrial ribosomal protein; ortholog of S. cerevisiae Mrp8; transcript induced in hyphal form; mutant is viable; flow model and rat catheter biofilm repressed	1.17823	1.17823	0.83949	1.19166	1.19166	0.14473
orf19.429	0	Putative non-canonical poly(A) polymerase; repressed by nitric oxide; Spider biofilm induced	1.1782	1.1782	0.9275	1.23293	1.23293	0.13976
orf19.2915	0	Ortholog(s) have ATPase activity, GTPase activity, adenosine-diphosphatase activity, cytidine diphosphatase activity, guanosine-diphosphatase activity, nucleoside-triphosphate diphosphatase activity, uridine-diphosphatase activity	1.17802	1.17802	0.17012	1.25674	1.25674	0.01363
orf19.2753	ZCF15	Predicted Zn(II)2Cys6 transcription factor of unknown function; rat catheter biofilm induced	1.17791	1.17791	0.24074	1.55217	1.55217	0.03835
orf19.2423	ZCF11	Zn(II)2Cys6 transcription factor; required for wild-type filamentous growth; mRNA binds She3	1.1773	1.1773	0.09126	-1.11211	0.89919	0.23655
orf19.2645	0	Ortholog of Candida albicans WO-1 : CAWG_04710	1.17726	1.17726	0.00249	1.04311	1.04311	0.79061
orf19.3097	PDA1	Putative pyruvate dehydrogenase alpha chain; fluconazole-induced; protein present in exponential and stationary growth phase yeast cultures; Hap43-induced; Spider biofilm repressed	1.17703	1.17703	0.65339	1.60227	1.60227	0.05193
orf19.5842	0	Protein with predicted siroheme synthase middle domains NAD(P)-binding; Hap43-repressed gene	1.17691	1.17691	0.08486	-1.0295	0.97134	0.88751
orf19.430	YPT53	Rab-family GTPase involved in vacuolar trafficking, colocolizes with Vps1p and Ypt52p in late endosome; Hap43-repressed gene	1.17675	1.17675	0.53036	1.80709	1.80709	0.00615
orf19.1185	0	Ortholog(s) have protein homodimerization activity, ubiquitin-protein ligase activity	1.17649	1.17649	0.78492	1.19216	1.19216	0.03939
orf19.5067	0	Predicted nuclear exosome-associated nucleic acid binding protein; rat catheter and Spider biofilm induced	1.17619	1.17619	0.25908	1.26512	1.26512	0.16938
orf19.4183	MUC1	Protein similar to S. cerevisiae Muc1; a cell surface glycoprotein involved in filamentous growth; repressed by benomyl treatment; mutant is viable	1.17617	1.17617	0.74172	1.17967	1.17967	0.2117
orf19.448	CUE5	Predicted ubiquitin-binding protein; rat catheter biofilm repressed	1.17606	1.17606	0.32306	1.02293	1.02293	0.8896
orf19.6561	LAT1	Putative dihydrolipoamide acetyltransferase component (E2) of pyruvate dehydrogenase complex; sumoylation target; Spider biofilm repressed	1.17605	1.17605	0.69783	1.61483	1.61483	0.04419
orf19.270	0	Ortholog of C. parapsilosis CDC317 : CPAR2_102150, C. dubliniensis CD36 : Cd36_82780, Pichia stipitis Pignal : psti_CGOB_00155 and Candida orthopsilosis Co 90-125 : CORT_0B03450	1.17571	1.17571	0.09363	1.10924	1.10924	0.14362
orf19.6689	ARG4	Argininosuccinate lyase, catalyzes the final step in the arginine biosynthesis pathway; alkaline downregulated; flow model biofilm induced; Spider biofilm induced	1.17545	1.17545	0.25055	1.16346	1.16346	0.06298
orf19.5008.1	DAD1	Subunit of the Dam1 (DASH) complex, which acts in chromosome segregation by coupling kinetochores to spindle microtubules	1.17509	1.17509	0.02083	-1.09988	0.90919	0.0574
orf19.1630	0	Ortholog(s) have cytoplasm localization	1.17492	1.17492	0.28836	-1.4065	0.71098	0.0197
orf19.5178	ERG5	Putative C-22 sterol desaturase; fungal C-22 sterol desaturases are cytochrome P450 enzymes of ergosterol biosynthesis, catalyze formation of the C-22(23) double bond in the sterol side chain; transposon mutation affects filamentous growth	1.17492	1.17492	0.13925	1.15075	1.15075	0.05467
orf19.201	0	Protein of unknown function; unmerged from orf19.202 in a revision of Assembly 21	1.17487	1.17487	0.13108	1.25765	1.25765	0.03133
orf19.357	0	Ortholog(s) have role in inner mitochondrial membrane organization, mitochondrion inheritance, mitochondrion morphogenesis, negative regulation of proteolysis, protein folding, replicative cell aging	1.17456	1.17456	0.24717	1.40127	1.40127	0.01001
orf19.7612	CTM1	Putative cytochrome c lysine methyltransferase; regulated by Gcn2 and Gcn4; transcript induced by Mnl1 under weak acid stress; early-stage flow model biofilm induced	1.17446	1.17446	0.40288	-1.09047	0.91704	0.45374
orf19.1394	0	Putative protein of unknown function; mutant is viable; protein level decreases in stationary phase cultures; Spider biofilm induced	1.17443	1.17443	0.38846	1.10509	1.10509	0.03488
orf19.1848.1	0	Ortholog of S. cerevisiae : KSH1, C. dubliniensis CD36 : Cd36_32390, C. parapsilosis CDC317 : CPAR2_203260, Candida tenuis NRRL Y-1498 : CANTEDRAFT_116778 and Debaryomyces hansenii CBS767 : DEHA2A10604g	1.17439	1.17439	0.42786	1.05549	1.05549	0.12013
orf19.3394	0	Predicted membrane protein; induced by alpha pheromone in SpiderM medium	1.17418	1.17418	0.23424	-1.08164	0.92452	0.17658
orf19.4726	0	Ortholog(s) have calcium ion binding, enzyme activator activity	1.17374	1.17374	0.05606	1.14124	1.14124	0.36225
orf19.2298	WBP1	Putative oligosaccharyltransferase subunit; Spider biofilm repressed	1.17347	1.17347	0.12395	1.14383	1.14383	0.13058
orf19.4785	PTC1	Putative protein phosphatase of the Type 2C-related family (serine/threonine-specific), similar to S. cerevisiae Ptc1p; mutant shows virulence defect	1.17327	1.17327	0.06623	1.08239	1.08239	0.24277
orf19.7400	ALS7	ALS family protein; hypermutable contingency gene; growth-regulated, downregulated in biofilm; two variable repeat regions; expression in S. cerevisiae does not confer adhesiveness; ALS family includes adhesins, cell-surface glycoproteins	1.17325	1.17325	0.10309	1.02492	1.02492	0.89889
orf19.4652	0	Protein of unknown function; rat catheter biofilm induced	1.17303	1.17303	0.04889	1.01803	1.01803	0.61936
orf19.7378	0	Ortholog(s) have phosphopantothenoylcysteine decarboxylase activity, protein phosphatase inhibitor activity and role in regulation of mitotic cell cycle, response to salt stress	1.1727	1.1727	0.08406	-1.05261	0.95002	0.79437
orf19.6358	0	Ortholog(s) have protein homodimerization activity, ubiquitin-protein ligase activity and role in free ubiquitin chain polymerization, postreplication repair, protein K63-linked ubiquitination	1.17263	1.17263	0.30907	1.32721	1.32721	0.00238
orf19.4174	0	Ortholog(s) have nicotinamide riboside transmembrane transporter activity, role in nicotinamide riboside transport, transmembrane transport and fungal-type vacuole membrane localization	1.17261	1.17261	0.2055	1.07909	1.07909	0.67404
orf19.2863.1	ERV1	Predicted component of the mitochondrial intermembrane space (IMS), involved in protein import into mitochondrial intermembrane space	1.17242	1.17242	0.15472	1.25648	1.25648	0.00937
orf19.2498	0	Predicted ubiquitin-protein ligase; Hap43-repressed gene; oxidative stress-induced via Cap1; flow model biofilm induced	1.17229	1.17229	0.00978	1.22547	1.22547	0.10926
orf19.1769	0	Ortholog(s) have G-protein beta/gamma-subunit complex binding, actin binding activity, role in positive regulation of transcription from RNA polymerase II promoter by pheromones, protein folding and cytoplasm localization	1.17187	1.17187	0.25011	-1.05196	0.9506	0.34953
orf19.3183	0	Protein with a role in insertion of tail-anchored proteins into the ER membrane; required for efficient mating, in shmoo formation and nuclear migration in the pre-zygote of S. cerevisiae; Hap43-repressed	1.17185	1.17185	0.82808	1.17572	1.17572	0.00961
orf19.4024	RIB5	Putative riboflavin synthase; fungal-specific (no human or murine homolog); farnesol-downregulated; protein present in exponential and stationary growth phase yeast cultures	1.17152	1.17152	0.25365	-1.07932	0.92651	0.50064
orf19.7397	0	Ortholog(s) have sequence-specific DNA binding activity and cytoplasm, nucleus, spindle localization	1.17147	1.17147	0.21294	-1.01025	0.98985	0.53798
orf19.2735	SEN2	Putative tRNA splicing endonuclease subunit; mutation confers hypersensitivity to toxic ergosterol analog and to amphotericin B; 5'-UTR intron; Hap43-induced; Spider biofilm induced	1.17147	1.17147	0.57267	1.08511	1.08511	0.96108
orf19.7592	FAA4	Predicted acyl CoA synthase	1.17146	1.17146	0.33947	-1.10473	0.9052	0.81787
orf19.6486	LDG3	Putative LDG family protein; F-12/CO2 early biofilm induced	1.1714	1.1714	0.44367	-1.06698	0.93723	0.0991
orf19.3440	FRP5	Protein with a GPR1/FUN34/yaaH family domain; flucytosine repressed	1.17116	1.17116	0.12896	1.30066	1.30066	0.00833
orf19.6321	PGA48	Putative GPI-anchored adhesin-like protein; similar to S. cerevisiae Spi1p, which is induced at stationary phase; transcript induced in high iron; flow model biofilm induced; Spider biofilm repressed	1.17103	1.17103	0.28619	-1.28761	0.77663	0.04215
orf19.2018.1	0	PProtein of unknown function; gene has intron; similar to human BLOC1S2	1.17091	1.17091	0.86879	-1.0472	0.95492	0.44979
orf19.6595	RTA4	Protein similar to S. cerevisiae Rsb1p, involved in fatty acid transport; transposon mutation affects filamentous growth; alkaline downregulated; caspofungin induced; possibly an essential gene; Hap43p-repressed	1.17075	1.17075	0.71037	-1.23017	0.81289	0.27221
orf19.4689	PGA57	Putative GPI-anchored protein; Hap43p-induced gene	1.17052	1.17052	0.10924	-1.15914	0.86271	0.02476
orf19.2910	PGA43	Putative GPI-anchored protein	1.17002	1.17002	0.89132	-1.00566	0.99438	0.57743
orf19.3904	MRV4	Protein of unknown function; Spider biofilm induced	1.17	1.17	0.57321	1.29496	1.29496	0.07532
orf19.6488	0	Ortholog of C. dubliniensis CD36 : Cd36_72050, C. parapsilosis CDC317 : CPAR2_301140, Candida tenuis NRRL Y-1498 : CANTEDRAFT_135055 and Debaryomyces hansenii CBS767 : DEHA2E07678g	1.16997	1.16997	0.11428	1.03927	1.03927	0.04026
orf19.6626	0	Predicted homeodomain-containing protein; possible transcription factor; possibly transcriptionally regulated upon hyphal formation	1.16992	1.16992	0.95249	1.20242	1.20242	0.0252
orf19.479.2	SEC22	Ortholog(s) have SNAP receptor activity and role in ER to Golgi vesicle-mediated transport, retrograde vesicle-mediated transport, Golgi to ER, vesicle fusion with Golgi apparatus	1.16973	1.16973	0.09498	1.25775	1.25775	0.08337
orf19.2745	UME7	Putative transcription factor with zinc cluster DNA-binding motif; similar to S. cerevisiae Ume6p, which is a transcription factor involved in the regulation of meiotic genes	1.16889	1.16889		1.00608	1.00608
orf19.6076	0	Ortholog(s) have protein transporter activity and role in ascospore formation, cellular response to cadmium ion, detoxification of cadmium ion, intracellular protein transport, retrograde transport, endosome to Golgi	1.16833	1.16833	0.0276	1.12577	1.12577	0.13307
orf19.1374	0	Ortholog of C. dubliniensis CD36 : Cd36_23840, Candida tenuis NRRL Y-1498 : CANTEDRAFT_104074, Debaryomyces hansenii CBS767 : DEHA2B13310g and Pichia stipitis Pignal : PICST_58235	1.1682	1.1682	0.234	1.21084	1.21084	0.11717
orf19.3644	0	Protein of unknown function; Cyr1-repressed; rat catheter and Spider biofilm induced	1.16775	1.16775	0.26864	1.24832	1.24832	0.00535
orf19.3268	TMA19	Cell wall protein, ortholog of S. cerevisiae Tma19p (Ykl065cp)	1.16773	1.16773	0.00224	-1.2201	0.81961	0.18098
orf19.1720	0	Ortholog(s) have role in mitotic recombination	1.16761	1.16761	0.31082	1.39369	1.39369	0.20284
orf19.2190	VRP1	Verprolin-related protein involved in actin cytoskeleton organization and polarized morphogenesis; interacts with Wal1p and Myo5p; downregulated upon adherence to polystyrene	1.16694	1.16694	0.07406	1.08311	1.08311	0.44273
orf19.1664	0	Protein of unknown function; expression downregulated in an ssr1 null mutant	1.16691	1.16691	0.0935	-1.09406	0.91403	0.13716
orf19.7224	0	Ortholog(s) have ubiquitin-protein ligase activity and role in histone catabolic process, histone ubiquitination	1.16665	1.16665	0.01016	1.15799	1.15799	0.01565
orf19.6987	DNM1	Putative dynamin-related GTPase; transcript upregulated inbRHE model of oral candidiasis; transcript regulated by Nrg1, Mig1, and Tup1	1.166	1.166	0.42057	1.19297	1.19297	0.04928
orf19.7279	NIT2	Putative carbon-nitrogen hydrolase; rat catheter biofilm repressed	1.16551	1.16551	0.17176	1.36169	1.36169	0.00243
orf19.4727	0	Ortholog(s) have succinate dehydrogenase (ubiquinone) activity	1.1654	1.1654	0.08721	1.06742	1.06742	0.97915
orf19.2131	0	Ortholog(s) have ubiquitin-protein ligase activity and role in protein ubiquitination, ubiquitin-dependent protein catabolic process via the multivesicular body sorting pathway	1.16485	1.16485	0.40663	1.09176	1.09176	0.1652
orf19.6988	OST1	Alpha subunit of the oligosaccharyltransferase complex of the ER lumen; catalyzes asparagine-linked glycosylation of newly synthesized proteins; Spider biofilm repressed	1.16481	1.16481	0.16447	1.10373	1.10373	0.97994
orf19.5634	FRP1	Ferric reductase; alkaline-induced by Rim101; iron-chelation-induced by CCAAT-binding factor; fluconazole-repressed; ciclopirox-, hypoxia-, Hap43-induced; colony morphology-related regulation by Ssn6; Spider and flow model biofilm induced	1.16476	1.16476	0.26234	1.29394	1.29394	0.0015
orf19.4280	0	Protein of unknown function; Spider biofilm induced; rat catheter biofilm repressed	1.16463	1.16463	0.83756	-1.09505	0.9132	0.34377
orf19.4684.2	RPL40B	Protein with similarity to the ribosomal protein portion of S. cerevisiae Rpl40Bp; colony morphology-related gene regulation by Ssn6; positively regulated by Tbf1; Spider biofilm repressed	1.16456	1.16456	0.40814	-1.11904	0.89362	0.57063
orf19.657	SAM2	S-adenosylmethionine synthetase; localizes to surface of hyphae, not yeast cells; alkaline, Hog1-induced; farnesol-downregulated; F-12/CO2 early biofilm induced; Spider biofilm repressed	1.16446	1.16446	0.30972	-1.03429	0.96684	0.47085
orf19.4863	PDC2	Homeodomain-like transcription factor; regulator of pyruvate decarboxylase; contains a putative C-terminal activation domain, Glu- and Pro-rich; complements glucose utilization defect of S. cerevisiae pdc2 mutant	1.1642	1.1642	0.8444	1.38062	1.38062	0.03335
orf19.997	SNL1	Ribosome-associated protein predicted to function in protein synthesis; 1 predicted transmembrane domain; rat catheter biofilm repressed	1.16389	1.16389	0.31122	1.12988	1.12988	0.22679
orf19.3931.2	0	Protein of unknown function	1.16354	1.16354
orf19.6448	0	Protein of unknown function; Spider biofilm repressed	1.16314	1.16314	0.03372	-1.11684	0.89538	0.33222
orf19.4448	SOG2	Leucine-rich-repeat domain protein of RAM cell wall integrity signaling network; role in cell separation, azole sensitivity; required for hyphal growth; lacks orthologs in higher eukaryotes	1.16178	1.16178	0.10688	1.08745	1.08745	0.18323
orf19.873	0	Ortholog of Candida albicans WO-1 : CAWG_04115	1.16177	1.16177	0.99145	1.16142	1.16142	0.02627
orf19.6297	0	Ortholog(s) have pseudouridine synthase activity, role in tRNA pseudouridine synthesis and cytosol, nucleus localization	1.16174	1.16174	0.03201	1.24535	1.24535	0.0127
orf19.4584	PHO114	Acid phosphatase; induced by Mnl1 under weak acid stress; Spider biofilm induced	1.16152	1.16152	0.43496	1.25763	1.25763	0.0053
orf19.2537	0	Protein of unknown function; transcript detected on high-resolution tiling arrays	1.16127	1.16127	0.40626	1.51282	1.51282	0.01293
orf19.6928	SAP9	Secreted aspartyl protease; roles in adhesion, cell surface integrity; induced by antifungal drugs, stationary phase, or in white-phase cells; farnesol-downregulated in biofilm; autocatalytic processing; GPI-anchor; Spider biofilm induced	1.16124	1.16124	0.3435	-1.02948	0.97136	0.2901
orf19.921	HMS1	hLh domain Myc-type transcript factor; required for morphogenesis induced by elevated temperature or Hsp90 compromise; acts downstream of Pcl1; Spider biofilm induced	1.16081	1.16081	0.13967	1.00315	1.00315	0.81656
orf19.4666	0	Protein of unknown function; hyphal-induced expression, regulated by Cyr1, Ras1, Efg1; Spider biofilm induced	1.16065	1.16065	0.43639	-1.09339	0.91459	0.80571
orf19.1029	RPP1	Putative ortholog of S. cerevisiae Rpp1; subunit of both RNase MRP and nuclear RNase P; rat catheter and Spider biofilm induced	1.1602	1.1602	0.36887	1.28618	1.28618	0.29106
orf19.267	0	Protein required for normal filamentous growth; mRNA binds She3	1.16011	1.16011	0.50717	1.12943	1.12943	0.08671
orf19.4341	0	Ortholog(s) have role in attachment of GPI anchor to protein, conidium formation, hyphal growth, sporocarp development involved in sexual reproduction and GPI-anchor transamidase complex localization	1.15991	1.15991	0.16793	1.27801	1.27801	0.05803
orf19.3908	MRV8	Protein of unknown function; Spider biofilm induced	1.15974	1.15974	0.04563	-1.09803	0.91072	0.16392
orf19.581	0	Putative RNA-binding protein; transcript is upregulated in an RHE model of oral candidiasis	1.15933	1.15933	0.34314	1.04532	1.04532	0.59544
orf19.1531	0	Ortholog(s) have RNA binding, protein heterodimerization activity, role in mRNA cleavage, mRNA polyadenylation and cytosol, mRNA cleavage factor complex, mitochondrion localization	1.15926	1.15926	0.03603	-1.09917	0.90977	0.05782
orf19.752	0	Has domain(s) with predicted methyltransferase activity and role in metabolic process	1.15909	1.15909	0.26705	1.04159	1.04159	0.5802
orf19.3801	FAV1	Protein with weak similarity to S. cerevisiae Fus2p; induced by alpha pheromone mating factor in MTLa/MTLa opaque cells	1.15906	1.15906	0.27557	1.19501	1.19501	0.1681
orf19.3428	0	Protein of unknown function; flow model biofilm induced	1.15862	1.15862	0.38126	1.31831	1.31831	0.02314
orf19.5519	GCV1	Putative T subunit of glycine decarboxylase; transcript negatively regulated by Sfu1; Spider biofilm repressed	1.15856	1.15856	0.37856	1.24182	1.24182	0.51836
orf19.936	0	Ortholog of C. dubliniensis CD36 : Cd36_50530, C. parapsilosis CDC317 : CPAR2_303990, Candida tenuis NRRL Y-1498 : CANTEDRAFT_107934 and Pichia stipitis Pignal : PICST_63283	1.15804	1.15804	0.08533	1.30359	1.30359	0.1626
orf19.6778	0	Aminophospholipid translocase (flippase); maintains membrane lipid asymmetry in post-Golgi secretory vesicles; contributes to clathrin-coated vesicle formation and endocytosis; flow model biofilm repressed	1.15751	1.15751	0.00257	1.14365	1.14365	0.00709
orf19.3329	0	Ortholog(s) have sphingosine-1-phosphate phosphatase activity, role in calcium-mediated signaling and endoplasmic reticulum localization	1.15728	1.15728	0.92452	1.30603	1.30603	0.0103
orf19.6834.10	TAR1	Ortholog of S. cerevisiae Tar1p; Transcript Antisense to Ribosomal RNA; encoded within the 25S rRNA gene on the opposite strand; induced by Tbf1	1.15691	1.15691		1.00701	1.00701
orf19.1522	0	Ortholog of C. dubliniensis CD36 : Cd36_16850, C. parapsilosis CDC317 : CPAR2_211990, Candida tenuis NRRL Y-1498 : cten_CGOB_00169 and Debaryomyces hansenii CBS767 : DEHA2G03036g	1.15661	1.15661	0.23641	1.2291	1.2291	0.4378
orf19.4942	0	Ortholog of Candida albicans WO-1 : CAWG_00134	1.15616	1.15616	0.23357	-1.02751	0.97322	0.77477
orf19.6020	0	Ortholog(s) have Atg8 ligase activity and role in C-terminal protein lipidation, CVT pathway, autophagic vacuole assembly, cellular response to nitrogen starvation, mitochondrion degradation, piecemeal microautophagy of nucleus	1.15593	1.15593	0.01993	1.26556	1.26556	0.05416
orf19.2406	0	Ortholog(s) have role in microautophagy, positive regulation of TOR signaling cascade, positive regulation of transcription from RNA polymerase II promoter	1.15567	1.15567	0.34423	1.124	1.124	0.27444
orf19.2832	INN1	Protein with similarity to S. cerevisiae Inn1p, which is an essential protein of the contractile actomyosin ring required for ingression of the plasma membrane into the bud neck during cytokinesis; contains a C2 membrane targeting domain	1.1553	1.1553	0.21884	1.3359	1.3359	0.0446
orf19.7662	0	Ortholog(s) have RNA polymerase II core binding activity, role in mRNA 3'-end processing, negative regulation of transposition, RNA-mediated and nuclear chromatin, site of double-strand break localization	1.15496	1.15496	0.15247	1.09123	1.09123	0.18411
orf19.4236	RET2	Delta subunit of the coatomer complex (COPI); coats Golgi-derived transport vesicles; involved in retrograde transport between Golgi and ER; interacts with Crk1 in the two-hybrid system; Spider biofilm repressed	1.1549	1.1549	0.91557	-1.10297	0.90664	0.04654
orf19.6722	0	Protein similar to S. cerevisiae Rad4p; down-regulation associated with azole resistance	1.1543	1.1543	0.04576	1.07908	1.07908	0.3835
orf19.5401	#N/A	#N/A	1.15323	1.15323	0.68814	-1.01044	0.98966	0.7742
orf19.3178	0	Ortholog(s) have RNA binding activity, role in mRNA splicing, via spliceosome and U2-type prespliceosome localization	1.15312	1.15312	0.10484	1.19408	1.19408	0.01794
orf19.6052	CNS1	Putative co-chaperone; Hap43p-induced gene; mutation confers hypersensitivity to radicicol	1.15291	1.15291	0.16515	1.16042	1.16042	0.33326
orf19.4031	0	Ortholog(s) have cytoplasm localization	1.15275	1.15275	0.16623	1.1407	1.1407	0.25021
orf19.6955	HBR3	Essential protein; regulated by hemoglobin; S. cerevisiae ortholog is essential; Hap43p-induced gene	1.15198	1.15198	0.61788	1.30584	1.30584	0.05461
orf19.4691	MRV1	Ortholog of Candida albicans WO-1 : CAWG_03682	1.15179	1.15179	0.01029	1.12277	1.12277	0.02293
orf19.301	PGA18	Putative GPI-anchored protein; regulated by Nrg1, Tup1; rat catheter biofilm repressed	1.15108	1.15108	0.28808	-1.11592	0.89612	0.20112
orf19.7363	KRE6	Essential beta-1,6-glucan synthase subunit; change in mRNA length, not abundance, at yeast-hypha transition; alkaline induced by Rim101, on cell wall regeneration; Spider biofilm induced; Bcr1-repressed in RPMI a/a biofilms	1.15082	1.15082	0.38018	1.08151	1.08151	0.58851
orf19.910	PRP3	Predicted splicing factor, component of the U4/U6-U5 snRNP complex; Hap43-induced gene; rat catheter biofilm induced	1.15067	1.15067	0.96495	1.21502	1.21502	0.0066
orf19.6992	QDR2	Predicted MFS membrane transporter, member of the drug:proton antiporter (12 spanner) (DHA1) family; Spider biofilm induced	1.15064	1.15064	0.10277	-1.16072	0.86153	0.56694
orf19.5356	0	Protein with a predicted role in cell wall integrity; repressed in core stress response	1.15059	1.15059	0.29245	1.4977	1.4977	0.02261
orf19.7033	0	Putative dual specificity protein phosphatase, similar to S. cerevisiae Pps1p	1.15057	1.15057	0.10667	1.15417	1.15417	0.43955
orf19.1467	COX13	Cytochrome c oxidase; flucytosine induced; repressed by nitric oxide	1.15049	1.15049	0.58766	1.30939	1.30939	0.16878
orf19.2113	0	Putative integral peroxisomal membrane protein; Hap43p-repressed gene	1.1504	1.1504	0.32246	1.40086	1.40086	0.03579
orf19.1086	0	Ortholog(s) have role in protein deubiquitination, regulation of ER to Golgi vesicle-mediated transport, regulation of retrograde vesicle-mediated transport, Golgi to ER, ribophagy and cytoplasm localization	1.15026	1.15026	0.95335	-1.38801	0.72046	0.00982
orf19.6844	ICL1	Isocitrate lyase; glyoxylate cycle enzyme; required for virulence in mice; induced upon phagocytosis by macrophage; farnesol regulated; Pex5-dependent peroxisomal localization; stationary phase enriched; rat catheter, Spider biofilm induced	1.15021	1.15021	0.31891	1.46836	1.46836	0.05076
orf19.480	0	Protein of unknown function; rat catheter and Spider biofilm induced	1.15012	1.15012	0.10307	-1.02982	0.97105	0.8342
orf19.7108	0	D-ribulose-5-phosphate 3-epimerase; stationary phase enriched protein	1.14961	1.14961	0.33976	1.02949	1.02949	0.6496
orf19.6674	BTS1	Putative geranylgeranyl diphosphate synthase; repressed by benomyl treatment; Spider biofilm induced	1.14941	1.14941	0.20435	1.31527	1.31527	0.0733
orf19.4356	HGT3	Putative glucose transporter of the major facilitator superfamily; the C. albicans glucose transporter family comprises 20 members; 12 probable membrane-spanning segments, extended C terminus; expressed in rich medium with 2% glucose	1.14922	1.14922	0.30388	1.10193	1.10193	0.15125
orf19.6491	0	Ortholog of Candida albicans WO-1 : CAWG_05572	1.14891	1.14891	0.21495	1.17957	1.17957	0.4902
orf19.1458	0	Ortholog(s) have tRNA-specific adenosine deaminase activity, role in tRNA modification and cytoplasm, nucleus localization	1.1488	1.1488	0.03684	1.08176	1.08176	0.22761
orf19.6479	SEC1	Ortholog(s) have SNARE binding activity and role in positive regulation of vesicle fusion, vesicle docking involved in exocytosis	1.14873	1.14873	0.95161	-1.02591	0.97475	0.47036
orf19.7167	0	Putative adhesin-like protein	1.14871	1.14871	0.2751	1.19562	1.19562	0.02283
orf19.2911	SEC3	Predicted subunit of the exocyst complex, involved in exocytosis; required for hyphal growth after the first septin ring formation; interacts with septins Cdc3p, Cdc10p, and Cdc11p; localizes to a crescent on the surface of the hyphal tip	1.14851	1.14851	0.8925	1.19574	1.19574	0.07932
orf19.872	0	Ortholog of C. dubliniensis CD36 : Cd36_18230, Debaryomyces hansenii CBS767 : DEHA2E20636g, Pichia stipitis Pignal : PICST_66811 and Spathaspora passalidarum NRRL Y-27907 : SPAPADRAFT_60843	1.1484	1.1484	0.0643	1.15672	1.15672	0.35266
orf19.7071	FGR2	Protein similar to phosphate transporters; transposon mutation affects filamentous growth; expression is regulated upon white-opaque switching	1.14834	1.14834	0.0492	1.21951	1.21951
orf19.3303	0	Ortholog(s) have tRNA methyltransferase activity, role in tRNA methylation, wybutosine biosynthetic process and cytosol, mitochondrion, nucleus localization	1.14817	1.14817	0.30987	1.34707	1.34707	0.17333
orf19.2800	0	Ortholog of Candida albicans WO-1 : CAWG_00667	1.14815	1.14815	0.36613	1.05117	1.05117	0.29093
orf19.6627	0	Protein of unknown function; possibly transcriptionally regulated upon hyphal formation	1.14813	1.14813	0.20405	1.10489	1.10489	0.72016
orf19.6805	0	Protein of unknown function; Spider biofilm induced	1.14798	1.14798	0.12957	1.34007	1.34007	0.01751
orf19.6671	LAP4	Protein similar to aminopeptidase I; mutation confers hypersensitivity to amphotericin B; transcript regulated in macrophage response; flow model biofilm induced	1.14781	1.14781	0.00416	-1.00535	0.99468	0.89564
orf19.3679	0	Putative protein of unknown function; stationary phase enriched protein	1.14709	1.14709	0.33992	1.2332	1.2332	0.01067
orf19.1601	RPL3	Ribosomal protein, large subunit; induced by ciclopirox olamine treatment; genes encoding cytoplasmic ribosomal subunits are downregulated upon phagocytosis by murine macrophages; Hap43-induced gene; Spider biofilm repressed	1.14708	1.14708	0.47018	-1.09554	0.91279	0.06237
orf19.4812	0	Phosphopantetheine:protein transferase (PPTase); Spider biofilm induced	1.14682	1.14682	0.25947	1.22946	1.22946	0.02932
orf19.2156	NAG1	Glucosamine-6-phosphate deaminase; required for normal hyphal growth and mouse virulence; converts glucosamine 6-P to fructose 6-P; reversible reaction in vitro; gene and protein is GlcNAc-induced; Spider biofilm induced	1.1468	1.1468	0.72828	-1.23605	0.80903	0.06951
orf19.3301	0	Putative ubiquitin ligase complex component; induced by heavy metal (cadmium) stress; Hog1-induced; transcript induced by Mnl1p under weak acid stress; flow model biofilm induced; Spider biofilm induced	1.14635	1.14635	0.18426	-1.01053	0.98958	0.68548
orf19.4455	0	Protein of unknown function; Spider biofilm induced	1.14613	1.14613	0.71675	-1.00142	0.99858	0.27925
orf19.5890	0	Ortholog of C. dubliniensis CD36 : Cd36_84350, C. parapsilosis CDC317 : CPAR2_806070, Candida tenuis NRRL Y-1498 : CANTEDRAFT_133308 and Debaryomyces hansenii CBS767 : DEHA2F11682g	1.14603	1.14603	0.27989	-1.12969	0.88519	0.07686
orf19.444	0	Has domain(s) with predicted nucleic acid binding, nucleotide binding activity	1.14588	1.14588	0.01824	1.02739	1.02739	0.53949
orf19.7509.1	ATP17	Mitochondrial ATPase complex subunit; downregulated by Efg1p; flucytosine induced; caspofungin repressed	1.1458	1.1458	0.97769	1.10507	1.10507	0.56153
orf19.7006	0	Ortholog(s) have role in reciprocal meiotic recombination	1.14532	1.14532	0.2429	1.12468	1.12468	0.35876
orf19.1745	0	Protein of unknown function; Hap43-repressed gene	1.1453	1.1453	0.80214	-1.11632	0.8958	0.68913
orf19.3954	PSD2	Ortholog(s) have phosphatidylserine decarboxylase activity, role in phosphatidylcholine biosynthetic process, phosphatidylethanolamine biosynthetic process and cell division site, cytosol, endosome localization	1.14515	1.14515	0.7406	1.38622	1.38622	0.04019
orf19.1031	HMG1	HMG-CoA reductase; enzyme of sterol pathway; inhibited by lovastatin; gene not transcriptionally regulated in response to lovastatin and fluconazole	1.14512	1.14512	0.46946	1.24251	1.24251	0.02902
orf19.6078	POL93	Predicted ORF in retrotransposon Tca8 with similarity to the Pol region of retrotransposons encoding reverse transcriptase, protease and integrase; downregulated in response to ciclopirox olamine; F-12/CO2 early biofilm induced	1.14509	1.14509	0.43952	1.01014	1.01014	0.89429
orf19.7405	0	Ortholog of Rad33; involved in nucleotide excision repair in S. cerevisiae; induced by Mnl1 under weak acid stress	1.14474	1.14474	0.32225	-1.13105	0.88413	0.20217
orf19.5304	0	Ortholog of C. dubliniensis CD36 : Cd36_43800 and Candida albicans WO-1 : CAWG_03395	1.14472	1.14472	0.24581	-1.14327	0.87469	0.06265
orf19.206	0	Putative adhesin-like protein	1.14461	1.14461	0.18948	-1.03668	0.96462	0.71463
orf19.6329	0	Protein of unknown function; opaque-specific transcript; fluconazole-repressed; induced in cyr1 mutant and in oralpharyngeal candidasis; Spider biofilm induced	1.14455	1.14455	0.10862	1.07294	1.07294	0.03796
orf19.3594	0	Putative adhesin-like protein; predicted ORF from Assembly 19; removed from Assembly 20; subsequently reinstated in Assembly 21 based on comparative genome	1.14384	1.14384	0.94093	1.11274	1.11274	0.03345
orf19.4993	SEC18	Functional homolog of S. cerevisiae Sec18p, which acts in protein transport; conserved ATP binding site; not glycosylated	1.14372	1.14372	0.88127	1.00762	1.00762	0.65648
orf19.6528	0	Ortholog of C. dubliniensis CD36 : Cd36_71740, C. parapsilosis CDC317 : CPAR2_703440, Candida tenuis NRRL Y-1498 : CANTEDRAFT_102923 and Debaryomyces hansenii CBS767 : DEHA2C03190g	1.14359	1.14359	0.02213	1.20652	1.20652	0.07193
orf19.3572	0	Ortholog of C. dubliniensis CD36 : Cd36_19880, Candida tenuis NRRL Y-1498 : CANTEDRAFT_117672, Debaryomyces hansenii CBS767 : DEHA2D11154g and Pichia stipitis Pignal : PICST_59570	1.14343	1.14343	0.77275	1.06403	1.06403	0.42306
orf19.3722	0	Predicted protein of rapamycin resistance; Spider biofilm induced	1.14334	1.14334	0.19381	1.10131	1.10131	0.27273
orf19.5693	0	Subunit of the GPI (glycosylphosphatidylinositol):protein transamidase complex; removes the GPI-anchor signal and attaches GPI to proteins in the ER; Spider biofilm repressed	1.14309	1.14309	0.29732	-1.37915	0.72508	0.03339
orf19.7014	0	Putative protein of unknown function; transcription is positively regulated by Tbf1p; overlaps orf19.7015	1.14302	1.14302	0.27081	-1.15558	0.86537
orf19.4191.1	0	Ortholog(s) have ubiquitin-ubiquitin ligase activity, role in ER-associated ubiquitin-dependent protein catabolic process, protein polyubiquitination and cytosol, nuclear envelope, proteasome complex localization	1.1429	1.1429	0.11607	-1.00391	0.99611	0.66082
orf19.5912	MAK21	Putative 66S pre-ribosomal particle subunit; mutation confers hypersensitivity to tubercidin (7-deazaadenosine)	1.14253	1.14253	0.27826	1.13474	1.13474	0.17192
orf19.2301	0	Ortholog(s) have role in proteasome regulatory particle assembly and cytosol, nucleus localization	1.14231	1.14231	0.17712	1.21508	1.21508	0.00667
orf19.2369.1	ATX1	Putative cytosolic copper metallochaperone; flucytosine induced; Ssr1-repressed; rat catheter biofilm induced	1.14222	1.14222	0.93725	1.50171	1.50171	0.28618
orf19.2868	0	Protein of unknown function; induced by alpha pheromone in SpiderM medium	1.14206	1.14206	0.31583	1.09711	1.09711	0.1123
orf19.5213	0	Putative protein of unknown function; transcript is upregulated in clinical isolates from HIV+ patients with oral candidiasis	1.14198	1.14198	0.12717	-1.08803	0.91909	0.27994
orf19.2808	ZCF16	Predicted Zn(II)2Cys6 transcription factor; mutants are viable; rat catheter biofilm induced	1.14197	1.14197	0.27911	1.03563	1.03563	0.4773
orf19.1624	0	Non-catalytic subunit of N-terminal acetyltransferase of the NatC type; flow model biofilm repressed	1.14194	1.14194	0.2319	-1.23611	0.80899	0.03581
orf19.3166	0	Ortholog(s) have role in Golgi to endosome transport, cell morphogenesis, cleistothecium development, conidium formation and endoplasmic reticulum organization, more	1.14165	1.14165	0.06631	-1.12514	0.88878	0.04822
orf19.6551	0	Ortholog(s) have SNAP receptor activity, role in Golgi vesicle transport, vesicle fusion and Golgi medial cisterna, SNARE complex localization	1.14159	1.14159	0.38217	1.08974	1.08974	0.24484
orf19.5532	0	Protein of unknown function; Spider biofilm induced	1.14159	1.14159	0.08501	1.1178	1.1178	0.01499
orf19.86	0	Putative glutathione peroxidase; induced by peroxide, exposure to neutrophils and macrophage blood fractions; repressed during infection of macrophages; Spider biofilm induced; flow model biofilm repressed	1.14139	1.14139	0.76472	1.33467	1.33467	0.05065
orf19.254	0	Protein of unknown function; Hog1p-repressed; Spider biofilm induced	1.14075	1.14075	0.12771	-1.07863	0.9271	0.31486
orf19.5592	0	Ortholog of C. dubliniensis CD36 : Cd36_63980, Candida tenuis NRRL Y-1498 : CANTEDRAFT_115187, Candida tropicalis MYA-3404 : CTRG_02719 and Candida albicans WO-1 : CAWG_05060	1.14069	1.14069	0.06188	1.04934	1.04934	0.51749
[truncated: 4,168 more rows]
