# Supplementary material for: A conserved regulator controls asexual sporulation in the fungal pathogen Candida albicans
Source: Nat Commun. 2020 Dec 4;11:6224. doi: 10.1038/s41467-020-20010-9 (PMC7718266; doi:10.1038/s41467-020-20010-9)
Supplement: Supplementary file 10 — Supplementary Data 7 [file 41467_2020_20010_MOESM10_ESM.xlsx]

## Sheet: Table S7 Scoring of clinic isol
Strain	Type	Clade	Scoring	Reference
CEC1289	invasive	3	0	15
CEC1424	superficial	1	0	6
CEC1426	superficial	11	0	7
CEC1492	unknown	4	0	6
CEC2018	superficial	9	4	7
CEC2019	superficial	12	0	6
CEC2020	superficial	1	0	16
CEC2021	invasive	2	2	7
CEC2022	invasive	4	0	17
CEC2023	commensal	8	2	18
CEC2871	invasive	18	0	19
CEC2872	invasive	18	0	19
CEC2876	invasive	18	2	19
CEC3494	commensal	11	0	20
CEC3529	commensal	1	2	17
CEC3530	commensal	4	0	17
CEC3531	commensal	2	4	17
CEC3532	commensal	4	0	17
CEC3533	commensal	9	0	17
CEC3534	commensal	1	0	16
CEC3535	commensal	4	0	16
CEC3536	commensal	4	0	16
CEC3537	commensal	12	1	16
CEC3538	superficial	4	1	Lab collection
CEC3539	unknown	2	0	21
CEC3540	invasive	4	0	15
CEC3541	invasive	4	2	15
CEC3542	superficial ?	4	1	Lab collection
CEC3544	commensal	1	0	20
CEC3547	commensal	11	0	20
CEC3548	commensal	3	0	20
CEC3549	commensal	2	2	20
CEC3550	starling	16	0	22
CEC3551	superficial	4	1	7
CEC3553	commensal	2	2	20
CEC3554	superficial	1	0	7
CEC3555	invasive	4	1	15
CEC3556	commensal	4	0	16
CEC3557	commensal	3	0	20
CEC3558	commensal	2	0	20
CEC3559	superficial	1	0	7
CEC3560	superficial	1	0	6
CEC3561	commensal	11	0	20
CEC3562	unknown	4	1	Lab collection
CEC3579	commensal	3	0	17
CEC3596	invasive	3	0	15
CEC3597	invasive	3	0	15
CEC3598	superficial ?	4	0	Lab collection
CEC3600	starling	16	0	22
CEC3601	commensal	11	0	20
CEC3602	commensal	4	0	16
CEC3603	commensal	1	0	16
CEC3605	commensal	1	0	16
CEC3606	commensal	4	0	Lab collection
CEC3607	commensal	4	2	16
CEC3609	commensal	1	0	16
CEC3610	commensal	4	0	16
CEC3611	commensal	4	1	16
CEC3612	commensal	2	0	16
CEC3613	commensal	8	2	16
CEC3614	commensal	2	0	16
CEC3615	commensal	2	2	16
CEC3616	commensal	10	0	16
CEC3617	commensal	1	1	16
CEC3618	commensal	11	0	20
CEC3619	commensal	NC	4	20
CEC3620	commensal	1	5	Lab collection
CEC3621	commensal	1	0	16
CEC3622	commensal	8	2	16
CEC3623	commensal	1	0	16
CEC3624	commensal	1	1	Lab collection
CEC3626	commensal	3	0	20
CEC3627	commensal	1	0	16
CEC3629	commensal	1	0	Lab collection
CEC3630	commensal	8	0	Lab collection
CEC3631	commensal	3	0	Lab collection
CEC3634	commensal	8	2	16
CEC3635	commensal	1	0	Lab collection
CEC3636	commensal	1	0	16
CEC3637	superficial	5	0	6
CEC3638	commensal	3	0	20
CEC3640	commensal	1	1	Lab collection
CEC3658	superficial	10	0	7
CEC3659	superficial	4	0	7
CEC3660	superficial	1	0	7
CEC3661	superficial	NC	2	7
CEC3662	invasive	1	0	7
CEC3663	invasive	NC	2	7
CEC3664	superficial	NC	1	7
CEC3665	superficial	NC	0	7
CEC3666	superficial ?	1	1	Lab collection
CEC3667	superficial ?	NC	1	Lab collection
CEC3668	superficial	9	1	7
CEC3669	superficial	2	2	7
CEC3671	invasive	7	1	7
CEC3672	invasive	1	0	7
CEC3673	invasive	1	0	7
CEC3674	superficial	4	0	7
CEC3675	invasive	4	0	7
CEC3676	superficial	4	1	7
CEC3678	superficial	1	1	7
CEC3679	superficial	1	0	7
CEC3680	invasive	12	0	7
CEC3681	invasive	3	0	7
CEC3682	invasive	1	0	7
CEC3683	invasive	4	4	7
CEC3684	invasive	NC	1	Lab collection
CEC3685	invasive	12	2	7
CEC3686	invasive	12	0	7
CEC3687	invasive	11	0	Lab collection
CEC3689	superficial ?	3	0	Lab collection
CEC3704	superficial	11	0	7
CEC3705	superficial ?	11	0	Lab collection
CEC3706	superficial	10	0	7
CEC3707	superficial	NC	1	7
CEC3708	superficial	NC	0	7
CEC3709	superficial ?	3	0	Lab collection
CEC3711	superficial	10	0	7
CEC3712	superficial	NC	1	7
CEC3713	superficial ?	1	0	Lab collection
CEC3715	superficial	3	0	7
CEC3716	superficial	4	0	7
CEC3786	invasive	18	2	7
CEC4022	unknown	2	1	Lab collection
CEC4023	unknown	NC	1	Lab collection
CEC4024	unknown	10	4	Lab collection
CEC4026	unknown	4	0	Lab collection
CEC4029	unknown	1	1	Lab collection
CEC4031	unknown	NC	0	Lab collection
CEC4032	superficial	1	3	8
CEC4033	unknown	1	0	Lab collection
CEC4034	unknown	2	1	Lab collection
CEC4035	superficial	1	0	8
CEC4036	unknown	1	0	Lab collection
CEC4038	superficial	3	0	Lab collection
CEC4039	superficial	NC	4	Lab collection
CEC4216	commensal	NC	0	Lab collection
CEC4217	commensal	1	0	Lab collection
CEC4218	commensal	1	1	Lab collection
CEC4297	N/A	N/A	5	This study
CEC704	superficial	4	1	8
CEC708	superficial	4	1	8
CEC709	superficial	3	0	Lab collection
CEC711	superficial	4	0	8
CEC712	superficial	4	1	8
CEC716	superficial	12	0	Lab collection
CEC718	superficial	1	0	8
CEC723	superficial	NC	0	Lab collection
CEC724	unknown	1	1	Lab collection
SC5314	invasive	1	0	1
