# Supplementary material for: A conserved regulator controls asexual sporulation in the fungal pathogen Candida albicans
Source: Nat Commun. 2020 Dec 4;11:6224. doi: 10.1038/s41467-020-20010-9 (PMC7718266; doi:10.1038/s41467-020-20010-9)
Supplement: Supplementary file 11 — Supplementary Data 8 [file 41467_2020_20010_MOESM11_ESM.xlsx]

## Sheet: Table S8 Expression data 
Probe ID	Gene name	Description	fold change	ratio	p-student
orf19.4463	0	Ortholog of Candida albicans WO-1 : CAWG_01004	-60.3837	0.01656	0.00195
orf19.555	0	Protein similar to S. cerevisiae Cis3p, which has a role cell-wall-related processes; predicted Kex2p substrate; possibly an essential gene, disruptants not obtained by UAU1 method	-42.4884	0.02354	0.00067
orf19.654	0	Predicted protein only found in C. albicans and C. dubliniensis; highly induced during chlamydospore development	-41.0261	0.02437	0.00066
orf19.5532	0	Protein of unknown function; Spider biofilm induced	-27.3301	0.03659	0.00637
orf19.4170	CSP2	Putative cell wall associated protein; C. albicans and C. dubliniensis specific gene highly induced during chlamydospore development in both species; localized to chlamydospore cell wall; Hap43-repressed; Spider biofilm induced	-23.2557	0.043	0.00547
orf19.4438	RME1	Zinc finger protein; controls meiosis in S. cerevisae; white-specific transcript; upregulation correlates with clinical development of fluconazole resistance; Upc2-regulated in hypoxia; flow model biofilm induced; Spider biofilm repressed	-11.0703	0.09033	0.00873
orf19.3512	CSP1	Putative cell wall associated protein; gene only found in C. albicans and C. dubliniensis; highly upregulated during chlamydospore development in both species; localized to chlamydospore cell wall	-8.74218	0.11439	0.00476
orf19.5784	AMO1	Putative peroxisomal copper amine oxidase	-6.5082	0.15365	0.01486
orf19.6267	0	Ortholog of C. dubliniensis CD36 : Cd36_06020, C. parapsilosis CDC317 : CPAR2_803380, Candida tenuis NRRL Y-1498 : CANTEDRAFT_91858 and Pichia stipitis Pignal : PICST_30337	-5.212	0.19186	0.01057
orf19.1062	0	Ortholog of C. dubliniensis CD36 : Cd36_04020, C. parapsilosis CDC317 : CPAR2_107000, Candida tenuis NRRL Y-1498 : CANTEDRAFT_113990 and Pichia stipitis Pignal : PICST_32780	-4.12749	0.24228	0.01084
orf19.7652	CKA1	Putative alpha subunit (catalytic subunit) of protein kinase CK2; Cka1p and Cka2p have a common target with respect to fluconazole resistance; synthetically lethal with CKA2; flucytosine induced	-4.0854	0.24477	0.00953
orf19.4526	HSP30	Putative heat shock protein; fluconazole repressed; amphotericin B induced; Spider biofilm induced; rat catheter biofilm induced	-3.96068	0.25248	0.0055
orf19.3499	0	Secreted potein; Hap43-repressed; fluconazole-induced; regulated by Tsa1, Tsa1B under H2O2 stress conditions; induced by Mnl1p under weak acid stress; Spider biofilm induced	-3.93586	0.25407	0.00831
orf19.2072	0	Ortholog(s) have (R)-carnitine transmembrane transporter activity, choline transmembrane transporter activity, ethanolamine transmembrane transporter activity	-3.89172	0.25696	0.01085
orf19.5655	0	Has domain(s) with predicted 2 iron, 2 sulfur cluster binding, iron ion binding, oxidoreductase activity, oxidoreductase activity and acting on paired donors, more	-3.83512	0.26075	0.00368
orf19.3475	0	Described as a Gag-related protein; hyphal induced; downregulation correlates with clinical development of fluconazole resistance; repressed by nitric oxide, 17-beta-estradiol, ethynyl estradiol	-3.78865	0.26395	0.00716
orf19.1723	0	Ortholog(s) have role in cellular response to drug, response to purine-containing compound and cytoplasm, nucleus localization	-3.71613	0.2691	0.0072
orf19.4515	0	Predicted protein with similarity to cell wall proteins; possibly an essential gene, disruptants not obtained by UAU1 method	-3.56753	0.28031	0.02729
orf19.31	0	Ortholog of C. parapsilosis CDC317 : CPAR2_201960, C. dubliniensis CD36 : Cd36_20900, Candida tropicalis MYA-3404 : CTRG_04756 and Candida albicans WO-1 : CAWG_04394	-3.49024	0.28651	0.01781
orf19.207	PGA55	GPI-anchored adhesin-like protein; filament induced; regulated by Nrg1, Tup1; regulated upon hyphal formation; mRNA binds to She3 and is localized to yeast-form buds and hyphal tips; induced during chlamydospore formation	-3.029	0.33014	0.01354
orf19.4169	0	Ortholog of C. dubliniensis CD36 : Cd36_40780, Candida tenuis NRRL Y-1498 : CANTEDRAFT_116553, Lodderomyces elongisporus NRLL YB-4239 : LELG_04263 and Debaryomyces hansenii CBS767 : DEHA2G21736g	-2.96663	0.33708	0.05361
orf19.4551	CTN1	Carnitine acetyl transferase; required for growth on nonfermentable carbon sources, not for hyphal growth or virulence in mice; induced in macrophage; macrophage/pseudohyphal-repressed after 16 hr; rat catheter, Spider biofilm induced	-2.93334	0.34091	0.00217
orf19.1167	0	Ortholog(s) have sulfonate dioxygenase activity and role in sulfur compound catabolic process	-2.9204	0.34242	0.02362
orf19.4873	0	Protein of unknown function; transcript regulated by white-opaque switch; flow model biofilm induced; Spider biofilm induced	-2.90182	0.34461	0.0076
orf19.1461	0	S. pombe ortholog SPCC576.01c is a predicted sulfonate dioxygenase; possibly transcriptionally regulated upon hyphal formation; Spider biofilm induced	-2.81656	0.35504	0.02695
orf19.3567	BIO32	Putative class III aminotransferase with a predicted role in biotin biosynthesis; Spider biofilm induced	-2.7801	0.3597	0.00976
orf19.2506	0	Protein of unknown function; opaque-specific transcript; induced during chlamydospore formation in both C. albicans and C. dubliniensis; Hog1-repressed; Spider biofilm induced	-2.71779	0.36795	0.03433
orf19.1830	0	Protein of unknown function; Hap43-induced; rat catheter and Spider biofilm induced	-2.61338	0.38265	0.00673
orf19.6556	0	Protein of unknown function; rat catheter, flow model and Spider biofilm induced	-2.60102	0.38447	0.00016
orf19.1344	0	Protein of unknown function; fluconazole-induced; Spider biofilm induced	-2.59554	0.38528	0.12949
orf19.4716	GDH3	NADP-glutamate dehydrogenase; Nrg1, Plc1 regulated; hypha, hypoxia, Efg1-repressed; Rim101-induced at pH 8; GlcNAc, ciclopirox, ketoconazole induced; exp and stationary phase protein; Spider biofilm repressed; rat catheter biofilm induced	-2.56518	0.38984	8.73954e-05
orf19.6306	0	Trimethylaminobutyraldehyde dehydrogenase, the third enzyme of the carnitine biosynthesis pathway	-2.53231	0.3949	0.02559
orf19.780	DUR1,2	Urea amidolyase; hydrolyzes urea to CO2; use of urea as N source and for hyphal switch in macrophage; regulated by Nrg1/Hap43; required for virulence; promotes mouse kidney and brain colonization; rat catheter and flow model biofilm induced	-2.51116	0.39822	0.01717
orf19.2509.1	0	Ortholog of C. dubliniensis CD36 : Cd36_29340, Spathaspora passalidarum NRRL Y-27907 : spas_CGOB_00040 and Candida albicans WO-1 : CAWG_00248	-2.46779	0.40522	0.08234
orf19.2432	HAC1	bZIP transcription factor; role in unfolded protein response and control of morphology; transcript undergoes atypical splicing at C terminus under ER stress; induced during mating and by caspofungin; mRNA binds She3; Spider biofilm induced	-2.44344	0.40926	0.00128
orf19.1774	0	Predicted dehydrogenase; transcript upregulated in an RHE model of oral candidiasis; virulence-group-correlated expression; Spider biofilm repressed	-2.41587	0.41393	0.07504
orf19.7053	GAC1	Putative regulatory subunit of ser/thr phosphoprotein phosphatase 1; fluconazole-induced; caspofungin repressed; transcript induced by Mnl1 under weak acid stress; regulated by Nrg1, Tup1; Spider and flow model biofilm induced	-2.38943	0.41851	0.00109
orf19.5625	0	Ortholog of C. dubliniensis CD36 : Cd36_63640, Pichia stipitis Pignal : PICST_32878, Candida guilliermondii ATCC 6260 : PGUG_03423 and Candida tropicalis MYA-3404 : CTRG_02106	-2.38555	0.41919	0.0008
orf19.638	FDH1	Formate dehydrogenase; oxidizes formate to CO2; Mig1 regulated; induced by macrophages; fluconazole-repressed; repressed by Efg1 in yeast, not hyphal conditions; stationary phase enriched; rat catheter and Spider biofilm induced	-2.37625	0.42083	0.08588
orf19.4789	0	Has domain(s) with predicted metal ion binding activity	-2.37388	0.42125	0.05977
orf19.5654	STE24	Prenyl-dependent protease	-2.36821	0.42226	0.02208
orf19.646	GLN1	Putative glutamate synthase; regulated by Tsa1, Tsa1B under H2O2 stress conditions; Spider biofilm induced	-2.34475	0.42648	0.03567
orf19.2114	0	Predicted uricase; ortholog of S. pombe SPCC1223.09; Spider biofilm induced	-2.34216	0.42696	0.03733
orf19.1122	0	Protein of unknown function; induced by alpha pheromone in SpiderM medium; Spider biofilm induced	-2.32397	0.4303	0.00165
orf19.5514	0	Ortholog of S. pombe SPCC550.08, an N-acetyltransferase; transcript induced during growth in the mouse cecum	-2.30074	0.43464	0.05067
orf19.6514	CUP9	Transcription factor; represses SOK1 expression in response to farnesol inhibition; yeast-hypha switch repressed; ketoconazole-induced; Plc1-regulated; colony morphology-related Ssn6 regulation; Spider, flow model biofilm induced	-2.28522	0.43759	0.00741
orf19.5806	ALD5	NAD-aldehyde dehydrogenase; decreased expression in fluconazole-resistant isolate, or in hyphae; biofilm induced; fluconazole-downregulated; protein abundance is affected by URA3 expression in the CAI-4 strain; stationary phase enriched	-2.26616	0.44128	0.03274
orf19.3226	0	Ortholog(s) have role in intracellular sterol transport and extracellular region, fungal-type vacuole lumen localization	-2.26451	0.4416	0.02868
orf19.7049	CYB5	Cytochrome b(5); ortholog of S. cerevisiae Cyb5; induced in high iron; fluconazole-induced; shows colony morphology-related gene regulation by Ssn6; mutants are viable	-2.23152	0.44812	0.00858
orf19.1562	0	Protein of unknown function; flow model biofilm induced; Spider biofilm induced; repressed by alpha pheromone in SpiderM medium	-2.22999	0.44843	0.07343
orf19.7592	FAA4	Predicted acyl CoA synthase	-2.21301	0.45187	0.0031
orf19.2991	HOL1	Putative MFS transporter; regulated by Nrg1; macrophage/pseudohyphal-repressed; induced by alpha pheromone in SpiderM medium; possibly an essential gene, disruptants not obtained by UAU1 method	-2.18755	0.45713	0.05282
orf19.7314	CDG1	Putative cysteine dioxygenases; role in conversion of cysteine to sulfite; transcript regulated upon white-opaque switch; rat catheter, Spider and flow model biofilm induced	-2.18494	0.45768	0.01119
orf19.787.1	0	Protein of unknown function; ORF added to Assembly 21 based on comparative genome analysis; protein detected by mass spec in stationary phase cultures	-2.1606	0.46283	0.01444
orf19.272	FAA21	Predicted acyl CoA synthetase; upregulated upon phagocytosis; transcript regulated by Nrg1 and Mig1	-2.14962	0.4652	0.02543
orf19.7196	0	Putative vacuolar protease; upregulated in the presence of human neutrophils; Spider biofilm induced	-2.10812	0.47436	0.01578
orf19.4674.1	CRD2	Metallothionein; for adaptation to growth in high copper; basal transcription is cadmium-repressed; Ssn6 regulated; complements copper sensitivity of an S. cerevisiae cup1 mutant; regulated by Sef1, Sfu1, and Hap43; Spider biofilm induced	-2.0983	0.47658	0.00109
orf19.1302	0	Ortholog of C. dubliniensis CD36 : Cd36_43500, Spathaspora passalidarum NRRL Y-27907 : SPAPADRAFT_64619, Candida tropicalis MYA-3404 : CTRG_00335 and Candida albicans WO-1 : CAWG_03437	-2.09201	0.47801	0.04609
orf19.4076	MET10	Sulfite reductase; role in sulfur amino acid metabolism; induced by human whole blood or PMNs; Hog1-induced; possibly adherence-induced; flow model, Spider model, F-12/CO2 biofilm induced	-2.08051	0.48065	0.01391
orf19.3172	0	Ortholog of C. dubliniensis CD36 : Cd36_51840, Candida tropicalis MYA-3404 : CTRG_05315 and Candida albicans WO-1 : CAWG_04584	-2.06166	0.48505	0.02395
orf19.5130	PDI1	Putative protein disulfide-isomerase; antigenic in human infection; soluble protein in hyphae; induced by filamentous growth; protein present in exponential and stationary growth phase yeast cultures; flow model biofilm repressed	-2.03818	0.49063	0.00643
orf19.1117	0	Protein similar to Candida boidinii formate dehydrogenase; virulence-group-correlated expression; Hap43-repressed; Spider biofilm repressed	-2.02939	0.49276	0.08934
orf19.2077	ZCF9	Putative Zn(II)2Cys6 transcription factor; hypersensitive to toxic ergosterol analog ECC69 and/or ECC1384	-2.02694	0.49335	0.12779
orf19.1939	0	Ortholog(s) have mRNA 3'-UTR binding activity, role in regulation of mRNA stability, regulation of phosphate metabolic process and cytoplasm localization	-2.02201	0.49456	0.09898
orf19.2479	UGA4	Putative gamma-aminobutyric acid/polyamine permease; nitrogen catabolite repressed gene, induced in absence of preferred N sources; transcriptionally induced upon phagocytosis by macrophage; gene regulation by nitrogen source requires Gat1p	-2.01486	0.49631	0.0502
orf19.6169	ATO1	Putative fungal-specific transmembrane protein; induced by Rgt1; Spider biofilm induced	-2.01337	0.49668	0.00089
orf19.5536	0	Has domain(s) with predicted carbon-nitrogen ligase activity, with glutamine as amido-N-donor activity	-1.99966	0.50008	0.0923
orf19.5000	CYB2	Putative cytochrome b2 precursor; induced in high iron; alkaline repressed; colony morphology-related gene regulation by Ssn6; Hap43-repressed; pider biofilm induced	-1.98933	0.50268	0.07804
orf19.2770.1	SOD1	Cytosolic copper- and zinc-containing superoxide dismutase; role in protection from oxidative stress; required for full virulence; alkaline induced by Rim101; induced by human blood; rat catheter, flow model and Spider biofilm repressed	-1.97666	0.5059	0.00453
orf19.7002	0	Ortholog of C. parapsilosis CDC317 : CPAR2_806990, Candida tenuis NRRL Y-1498 : CANTEDRAFT_122709, Debaryomyces hansenii CBS767 : DEHA2E00110g and Pichia stipitis Pignal : PICST_30109	-1.96199	0.50969	0.04196
orf19.4688	DAG7	Secretory protein; a-specific, alpha-factor induced; mutation confers hypersensitivity to toxic ergosterol analog; fluconazole-induced; induced during chlamydospore formation in C. albicans and C. dubliniensis	-1.94841	0.51324	0.04447
orf19.7379	FAA2	Putative acyl CoA synthetase; expression regulated upon white-opaque switch; rat catheter biofilm induced; Spider biofilm induced	-1.94746	0.51349	0.08035
orf19.7600	FDH3	Glutathione-dependent formaldehyde dehydrogenase; glycine catabolism; repressed by Efg1 in yeast, not hyphal growth conditions; induced by Mnl1 under weak acid stress; Spider biofilm repressed	-1.94487	0.51417	0.1344
orf19.4114	FAA2-1	Predicted long chain fatty acid CoA ligase; upregulated upon phagocytosis; induced by nitric oxide independent of Yhb1	-1.92279	0.52008	0.11525
orf19.6852.1	0	Protein of unknown function; Spider biofilm induced	-1.88187	0.53139	0.00789
orf19.641	0	Ortholog(s) have role in protein folding and endoplasmic reticulum localization	-1.8777	0.53257	0.0284
orf19.4465	0	Protein of unknown function; Spider biofilm induced	-1.87634	0.53295	0.04349
orf19.3646	CTR1	Copper transporter; transcribed in low copper; induced Mac1, Tye7, macrophage interaction, alkaline pH via Rim101; 17-beta-estradiol repressed; complements S. cerevisiae ctr1 ctr3 copper transport mutant; flow model/Spider biofilm induced	-1.87482	0.53338	0.01465
orf19.2843	RHO1	Small GTPase of Rho family; regulates beta-1,3-glucan synthesis activity and binds Gsc1p; essential; expected to be geranylgeranylated by geranylgeranyltransferase type I; plasma membrane-localized	-1.868	0.53533	0.01597
orf19.4011	0	Similar to S. pombe mug180, a predicted esterase/lipase; highly induced during chlamydospore formation in both C. albicans and C. dubliniensis; flow model biofilm induced	-1.86782	0.53538	0.08629
orf19.3353	0	Protein similar to a mitochondrial complex I intermediate-associated protein; fluconazole-repressed; Spider biofilm induced; rat catheter biofilm repressed	-1.86554	0.53604	0.10471
orf19.7150	NRG1	Transcription factor/repressor; regulates chlamydospore formation/hyphal gene induction/virulence and rescue/stress response genes; effects both Tup1 dependent and independent regulation; flow model biofilm induced; Spider biofilm repressed	-1.86479	0.53625	0.03273
orf19.789	PYC2	Putative pyruvate carboxylase; binds biotin cofactor; repressed by Ssk1 response regulator, by benomyl treatment, or in an azole-resistant strain overexpressing MDR1; stationary phase enriched protein; flow model biofilm repressed	-1.85605	0.53878	0.04575
orf19.1801	CBR1	Putative cytochrome B5 reductase; plasma membrane-localized	-1.84938	0.54072	0.05068
orf19.5025	MET3	ATP sulfurlyase; sulfate assimilation; repressed by Met, Cys, Sfu1, or in fluconazole-resistant isolate; Hog1, caspofungin, white phase-induced; induced on biofilm formation, even in presence of Met and Cys; Spider, F-12/CO2 biofilm induced	-1.84524	0.54194	0.02896
orf19.4063	GPT1	GABA/polyamine transporter; 9 to 11 membrane spanning segments; complements GABA uptake defect of an S. cerevisiae uga4 put4 gap1 triple mutant; complements growth of an S. cerevisiae spe1 mutant under polyamine limitation	-1.84273	0.54267	0.07022
orf19.742	ALD6	Putative aldehyde dehydrogenase; stationary phase enriched protein; expression regulated upon white-opaque switch; rat catheter biofilm induced; rat catheter and Spider biofilm induced	-1.84101	0.54318	0.00663
orf19.2059	0	Protein with homology to magnesium-dependent endonucleases and phosphatases; regulated by Sef1, Sfu1, and Hap43; Spider biofilm induced	-1.8373	0.54428	0.01035
orf19.203	STB3	Putative SIN3-binding protein 3 homolog; caspofungin induced; macrophage/pseudohyphal-repressed; rat catheter biofilm induced	-1.8372	0.54431	0.00011
orf19.7608	0	Protein of unknown function; fluconazole-repressed; Spider biofilm induced	-1.83458	0.54508	0.21977
orf19.3869	0	Protein of unknown function; regulated by Tsa1, Tsa1B in minimal media at 37 degrees C; shows colony morphology-related gene regulation by Ssn6; Spider biofilm induced	-1.82648	0.5475	0.01822
orf19.2242	PRB1	Endoprotease B; regulated by heat, carbon source (GlcNAc-induced), nitrogen, macrophage response, human neutrophils; similar to (does not replace) S. cerevisiae vacuolar B protease Prb1p; flow model biofilm induced; Spider biofilm induced	-1.82281	0.5486	0.02778
orf19.431	ZCF2	Zn(II)2Cys6 transcription factor; regulates sulfite tolerance through expression of SSU1 and CDG1; Hap43-repressed; Spider biofilm induced	-1.81449	0.55112	0.00157
orf19.409	0	Ortholog of S. cerevisiae Aim38/Rcf2, cytochrome c oxidase subunit; plasma membrane localized; Hap43-repressed; induced in oralpharyngeal candidasis; flow model biofilm induced; Spider biofilm repressed	-1.81349	0.55142	0.06742
orf19.6414.3	TPM2	Putative tropomyosin isoform 2; regulated by Gcn4; repressed by amino acid starvation; macrophage-induced; protein levels decrease in stationary cells; Hap43-induced; rat catheter and Spider biofilm repressed	-1.80542	0.55389	0.00183
orf19.4335	TNA1	Putative nicotinic acid transporter; detected at germ tube plasma membrane by mass spectrometry; transcript induced upon phagocytosis by macrophage; rat catheter biofilm induced	-1.80071	0.55534	0.00125
orf19.1652	POX1-3	Predicted acyl-CoA oxidase; farnesol regulated; stationary phase enriched protein; Spider biofilm induced	-1.80012	0.55552	0.05411
orf19.4864	0	Ortholog(s) have acylglycerol lipase activity, serine hydrolase activity, role in triglyceride metabolic process and lipid particle, mitochondrial outer membrane, plasma membrane localization	-1.79126	0.55827	0.13258
orf19.556	0	Protein of unknown function; regulated by Ssn6	-1.78267	0.56096	0.06231
orf19.4026	HIS1	ATP phosphoribosyl transferase; enzyme of histidine biosynthesis; acid upregulated/alkaline repressed by Rim101; regulated by Gcn2, Gcn4; strain CA9 is a his1 mutant; flow model biofilm induced; Spider biofilm repressed	-1.77541	0.56325	0.00603
orf19.1369	0	Protein with predicted peptidase domains; Hap43-repressed gene	-1.76932	0.56519	0.25561
orf19.6687	0	Protein of unknown function; rat catheter biofilm repressed	-1.76249	0.56738	0.03854
orf19.1277	0	Protein of unknown function; Rgt1, Hap43-repressed; flow model biofilm induced; Spider biofilm induced	-1.75946	0.56836	0.01511
orf19.3352	0	Has domain(s) with predicted oxidoreductase activity and role in metabolic process	-1.75821	0.56876	0.06822
orf19.6445	ECI1	Protein similar to S. cerevisiae Eci1p, which is involved in fatty acid oxidation; transposon mutation affects filamentous growth; expression is regulated upon white-opaque switching	-1.75453	0.56995	0.06987
orf19.1704	FOX3	Putative peroxisomal 3-oxoacyl CoA thiolase; transcript regulated by white-opaque switch; Spider biofilm induced	-1.7538	0.57019	0.046
orf19.4934	OP4	Ala- Leu- and Ser-rich protein; secreted; N-terminal hydrophobic region; possible glycosylation; opaque-specific transcript; repressed by alpha pheromone in opaque MTLa homozygotes; fluconazole-induced; Spider biofilm induced	-1.75184	0.57083	0.25105
orf19.3182	GIS2	Translational activator for mRNAs with internal ribosome entry sites; induced in high iron; repressed by yeast-hypha switch; null exhibits sensitivity to sorbitol, 5-fluorocytosine, and cold temperatures; Spider biofilm repressed	-1.75162	0.5709	0.02712
orf19.5037	HRQ2	Protein of unknown function; mutants are viable; rat catheter and Spider biofilm induced	-1.74883	0.57181	0.06395
orf19.7094	HGT12	Glucose, fructose, mannose transporter; major facilitator superfamily; role in macrophage-induced hyphal growth; detected at germ tube plasma membrane by mass spectrometry; Snf3p-induced; 12 probable transmembrane segments	-1.7481	0.57205	0.1167
orf19.413	0	Protein of unknown function; induced by Sfu1; Spider biofilm induced	-1.747	0.57241	0.01689
orf19.5495	0	Putative RNA-binding protein; induced by alpha pheromone in SpiderM medium	-1.74323	0.57365	0.02122
orf19.4579	ERV29	Putative SURF4 family member; plasma membrane-localized; flow model biofilm repressed	-1.72625	0.57929	0.00934
orf19.3748	0	Protein of unknown function; orf19.3747 and orf19.3748 are short, overlapping ORFs in intergenic region between 2 oligopeptide transporter-encoding genes; flow model biofilm induced	-1.7145	0.58326	0.27198
orf19.4567	0	Catechol 1,2-dioxygenase (1,2-CTD), involved in degradation of aromatic compounds; Spider biofilm induced	-1.71399	0.58343	0.25949
orf19.2333	0	Ortholog(s) have role in retrograde transport, endosome to Golgi and cytosol, late endosome, nucleus localization	-1.71311	0.58373	0.02716
orf19.1721	NCE103	Carbonic anhydrase; converts of CO2 to bicarbonate; essential for virulence in host niches with limited CO2, normal white-opaque switch; Mnl1-induced in weak acid stress; Hap43-induced gene; F-12/CO2, rat catheter, Spider biofilm induced	-1.70956	0.58495	0.00526
orf19.653	0	Dubious open reading frame	-1.70823	0.5854	0.2171
orf19.4274	PUT1	Putative proline oxidase; alkaline upregulated by Rim101; flow model biofilm induced; Spider biofilm induced	-1.70727	0.58573	0.04314
orf19.7571	UBC4	Ortholog(s) have protein binding, bridging, ubiquitin binding, ubiquitin conjugating enzyme activity	-1.7046	0.58665	0.00682
orf19.6329	0	Protein of unknown function; opaque-specific transcript; fluconazole-repressed; induced in cyr1 mutant and in oralpharyngeal candidasis; Spider biofilm induced	-1.69114	0.59132	0.34599
orf19.5454	DAL1	Putative allantoinase; transcript regulated by Nrg1 and Mig1; macrophage/pseudohyphal-repressed	-1.68277	0.59426	0.09058
orf19.7046	MET28	Predicted bZIP domain-containing transcription factor; protein induced during the mating process; possibly essential, disruptants not obtained by UAU1 method; Hap43-repressed; rat catheter biofilm induced	-1.68168	0.59464	0.02216
orf19.5392	NGT1	N-acetylglucosamine (GlcNAc)-specific transporter; role in GlcNAc (but not serum) induced hyphal growth; localizes to plasma membrane; induced by GlcNAc, macrophage engulfment; 12 transmembrane, major facilitator superfamily	-1.67966	0.59536	0.08251
orf19.3516	0	Protein of unknown function; Hap43-repressed; Spider biofilm repressed	-1.67034	0.59868	0.07865
orf19.430	YPT53	Rab-family GTPase involved in vacuolar trafficking, colocolizes with Vps1p and Ypt52p in late endosome; Hap43-repressed gene	-1.66815	0.59947	0.002
orf19.6073	HMX1	Heme oxygenase; utilization of hemin iron; transcript induced by heat, low iron, or hemin; repressed by Efg1; induced by low iron; upregulated by Rim101 at pH 8; Hap43-induced; Spider and flow model biofilm induced	-1.6627	0.60143	0.00261
orf19.3330.3	POX18	Similar to Pox18, a peroxisomal protein; induced during chlamydospore formation in C. albicans and C. dubliniensis; A21 sequence updated based on new sequence and analysis, the allelic orf19.10841 was reinstated; Spider biofilm induced	-1.66089	0.60209	0.05532
orf19.3902	MRV2	Protein of unknown function; repressed by fluphenazine treatment or in an azole-resistant strain that overexpresses CDR1 and CDR2; Spider biofilm induced	-1.65911	0.60273	0.76163
orf19.4546	HOL4	Putative ion transporter; alkaline induced by Rim101; Plc1-regulated; caspofungin repressed; rat catheter and Spider biofilm induced	-1.65644	0.6037	0.02067
orf19.2738	SUL2	Putative sulfate transporter; transcript negatively regulated by Sfu1; amphotericin B induced; F-12/CO2 and Spider biofilm induced	-1.65426	0.6045	0.01433
orf19.1239	0	Secreted protein; exogenously expressed protein is a substrate for Kex2 processing in vitro; fluconazole-regulated; Spider biofilm induced	-1.65359	0.60474	0.15673
orf19.6817	FCR1	Transcription factor; repressor of fluconazole/ketoconazole/brefeldin A resistance; Tn mutation enhances filamentation; partially rescues S. cerevisiae pdr1 pdr3 fluconazole sensitivity; rat catheter biofilm induced/Spider biofilm repressed	-1.64922	0.60635	0.03577
orf19.1224	FRP3	Putative ammonium transporter; upregulated in the presence of human neutrophils; fluconazole-downregulated; repressed by nitric oxide; Spider biofilm induced; rat catheter biofilm repressed	-1.64584	0.60759	0.01381
orf19.1303	0	Ortholog(s) have translation release factor activity, role in mitochondrial translational termination and mitochondrial inner membrane localization	-1.64568	0.60765	0.00616
orf19.2599	CRC1	Mitochondrial carnitine carrier protein	-1.64403	0.60826	0.03479
orf19.2480.1	AUT7	Putative autophagosome protein; macrophage/pseudohyphal-repressed; alternatively spliced intron in 5' UTR; Spider biofilm induced	-1.64382	0.60834	0.05807
orf19.1169	0	Putative DnaJ-like molecular chaperone; Spider biofilm induced	-1.64298	0.60865	0.0238
orf19.2496	ATO2	Putative fungal-specific transmembrane protein; fluconazole repressed, Hap43-repressed; flow model biofilm induced; Spider biofilm induced	-1.64071	0.60949	0.08089
orf19.6948	CCC1	Manganese transporter; required for normal filamentous growth; mRNA binds She3, localized to hyphal tips; repressed by NO, alkaline pH; colony morphology-related regulation by Ssn6; regulated by Sef1, Sfu1, Hap43; Spider biofilm induced	-1.63903	0.61012	0.01076
orf19.532	RBR2	Cell wall protein; expression repressed by Rim101; transcript regulated upon white-opaque switching; repressed by alpha pheromone in SpiderM medium; macrophage-induced gene	-1.63461	0.61176	0.24567
orf19.868	ADAEC	Protein of unknown function; transcription is specific to white cell type	-1.63303	0.61236	0.0392
orf19.1187	CPH2	Myc-bHLH transcription factor; promotes hyphal growth; directly regulates Tec1 to induce hypha-specific genes; probably homodimeric, phosphorylated; required for colonization of the mouse GI tract; rat catheter and Spider biofilm induced	-1.63105	0.6131	0.01011
orf19.2013	KAR2	Similar to Hsp70 family chaperones; role in translocation of proteins into the ER; induced in high iron; protein present in exponential and stationary growth phase yeast cultures; flow model and Spider biofilm repressed	-1.61963	0.61742	0.03187
orf19.6741	0	Putative plasma membrane protein; predicted role in cell wall integrity; regulated by Nrg1, Tup1; induced during chlamydospore formation in both C. albicans and C. dubliniensis	-1.61886	0.61772	0.0858
orf19.176	OPT4	Oligopeptide transporter; detected at germ tube plasma membrane; transcript inducede during phagocytosis by macrophages; fungal-specific; Hap43-repressed; merged with orf19.2292 in Assembly 20; rat catheter and Spider biofilm induced	-1.61812	0.618	0.19222
orf19.3441	FRP6	Putative ammonia transport protein; regulated by Nrg1 and Tup1; regulated by Ssn6; induced by human neutrophils	-1.61797	0.61806	0.00606
orf19.3751	0	Putative serine/threonine protein kinase; possibly an essential gene, disruptants not obtained by UAU1 method	-1.61361	0.61973	0.05773
orf19.4952	0	Protein of unknown function; flow model biofilm induced; Spider biofilm induced	-1.61288	0.62001	0.03012
orf19.3152	AMO2	Protein similar to A. niger predicted peroxisomal copper amino oxidase; mutation confers hypersensitivity to toxic ergosterol analog; F-12/CO2 early biofilm induced	-1.61178	0.62043	0.0687
orf19.6688	0	Protein of unknown function; expression decreases by benomyl treatment or in an azole-resistant strain overexpressing MDR1; Spider biofilm induced	-1.6061	0.62263	0.0125
orf19.3841	ATG1	Putative protein serine/threonine kinase; predicted role in vesicle formation in autophagy and the cytoplasm-to-vacuole targeting (Cvt) pathway; Spider biofilm induced	-1.59326	0.62764	0.06783
orf19.6254	ANT1	Peroxisomal adenine nucleotide transporter; role in beta-oxidation of medium-chain fatty acid and peroxisome proliferation; rat catheter biofilm induced	-1.59251	0.62794	0.08021
orf19.1358	GCN4	bZIP transcription factor; amino acid control response; required for Efg1-dependent pseudohyphal induction by amino acid starvation, not by serum; human whole blood and PMN induced; required for biofilm formation; Spider biofilm induced	-1.59215	0.62808	0.0125
orf19.2317	0	Protein of unknown function; induced by alpha pheromone in SpiderM medium	-1.59058	0.6287	0.07866
orf19.5233	0	Ortholog of Candida albicans WO-1 : CAWG_00211	-1.58993	0.62896	0.04595
orf19.3211	RCF3	Putative heteropentameric replication factor C subunit; transcription is induced upon filamentous growth	-1.58855	0.6295	0.28196
orf19.3263	ATO10	Putative fungal-specific transmembrane protein; rat catheter and Spider biofilm induced	-1.58531	0.63079	0.05576
orf19.356	GTT13	Putative glutathione S-transferase; opaque-specific transcript; repressed by alpha pheromone in SpiderM medium; Spider biofilm induced	-1.58511	0.63087	0.25715
orf19.5449	0	Predicted integral membrane protein; Spider biofilm induced	-1.58346	0.63153	0.42542
orf19.5455	0	Ortholog(s) have GTPase regulator activity, mRNA binding activity	-1.57947	0.63313	0.04818
orf19.652	0	Ortholog(s) have crossover junction endodeoxyribonuclease activity, role in DNA repair and cytoplasm, nucleus localization	-1.57689	0.63416	0.16835
orf19.2886	CEK1	ERK-family protein kinase; required for wild-type yeast-hypha switch, mating efficiency, virulence in mice; Cst20-Hst7-Cek1-Cph1 MAPK pathway regulates mating, and invasive hyphal growth under some conditions; Spider biofilm induced	-1.57682	0.63419	0.04141
orf19.7357	0	Ortholog(s) have phosphopantothenate--cysteine ligase activity, role in acetyl-CoA biosynthetic process from pantothenate, coenzyme A biosynthetic process and CoA-synthesizing protein complex, cytosol, nucleus localization	-1.57297	0.63574	0.04532
orf19.1065	SSA2	HSP70 family chaperone; cell wall fractions; antigenic; beta-defensin peptides impport; ATPase domain binds histatin 5; at hyphal surface, not yeast; farnesol-repressed in biofilm; flow model, Spider biofilm repressed; caspofungin repressed	-1.57144	0.63636	0.13486
orf19.5826	0	Predicted amino acid transmembrane transporter; rat catheter biofilm repressed	-1.56994	0.63697	0.07794
orf19.6937	PTR22	Oligopeptide transporter involved in uptake of di-/tripeptides; regulated by Stp2 and Stp3; transcript induced upon phagocytosis by macrophage; repressed by Rim101 at pH 8; flow model biofilm induced	-1.56955	0.63713	0.1598
orf19.1847	ARO10	Aromatic decarboxylase; Ehrlich fusel oil pathway of aromatic alcohol biosynthesis; alkaline repressed; protein abundance affected by URA3 expression in CAI-4 strain; Spider biofilm induced	-1.56951	0.63714	0.26846
orf19.258	0	Protein of unknown function; Spider biofilm induced	-1.56432	0.63926	0.02655
orf19.2752	ADR1	C2H2 transcription factor; ortholog of S. cerevisiae Adr1 but mutant phenotype suggests a different set of target genes; transposon mutation affects filamentous growth; Spider biofilm induced	-1.56203	0.64019	0.12267
orf19.4456	GAP4	Putative amino acid permease; hyphal induced; regulated by Hap43, Gcn2 and Gcn4; colony morphology-related gene regulation by Ssnp; detected at plasma membrane of yeast and germ tube by mass spec; Spider biofilm induced	-1.56124	0.64052	0.01507
orf19.7085	0	Protein of unknown function; induced in core stress response; induced by cadmium stress via Hog1; oxidative stress-induced via Cap1; induced by Mnl1 under weak acid stress; macrophage-repressed; rat catheter and Spider biofilm induced	-1.5608	0.6407	0.22679
orf19.419	0	Protein of unknown function; flow model biofilm induced; Spider biofilm induced	-1.55666	0.6424	0.14602
orf19.6966	0	Ortholog(s) have choline kinase activity, ethanolamine kinase activity, role in phosphatidylcholine biosynthetic process, phosphatidylethanolamine biosynthetic process and cytosol, nucleus localization	-1.5527	0.64404	0.07149
orf19.7502	0	Protein of unknown function; Hap43-induced gene; upregulated in a cyr1 null mutant; Spider biofilm induced	-1.55044	0.64498	0.01459
orf19.2133	LIP4	Secreted lipase, member of a differentially expressed lipase gene family with possible roles in nutrition and/or in creating an acidic microenvironment; expressed more strongly during mucosal infections than during systemic infections	-1.55032	0.64503	0.03599
orf19.1069	RPN4	C2H2 transcription factor; putative regulator of proteasome genes; DNA recognition sequence (GAAGGCAAAA) enriched in regions upstream of proteasome genes; induced in core stress response; Hap43-induced; Spider biofilm induced	-1.5483	0.64587	0.0026
orf19.3885	0	Has domain(s) with predicted N-acetyltransferase activity; highly induced during chlamydospore formation in both C. albicans and C. dubliniensis	-1.54553	0.64703	0.04885
orf19.5334	ZSF1	Ortholog od S. cerevisiae Tis11, a mRNA-binding protein; transcription regulated by yeast-hyphal switch; flow model biofilm induced; Spider biofilm repressed	-1.54229	0.64839	0.0439
orf19.2552	0	Protein similar to S. cerevisiae Pmr1p; amphotericin B induced; previously merged with orf19.2553; unmerged from orf19.2553 in a revision of Assembly 21	-1.53308	0.65228	0.29823
orf19.273	0	Ortholog(s) have unfolded protein binding activity, role in sterol biosynthetic process and endoplasmic reticulum localization	-1.53262	0.65248	0.00545
orf19.539	LAP3	Putative aminopeptidase; positively regulated by Sfu1; clade-associated gene expression; virulence-group-correlated expression; induced by alpha pheromone in SpiderM medium; Hap43-induced; Spider and flow model biofilm induced	-1.53119	0.65309	0.06949
orf19.1979	GIT3	Glycerophosphocholine permease; white cell specific transcript; fungal-specific; alkaline repressed; caspofungin, macrophage/pseudohyphal-repressed; flow model biofilm induced; Spider biofilm induced	-1.52785	0.65451	0.09567
orf19.4631	ERG251	C-4 sterol methyl oxidase; role in ergosterol biosynthesis; Hap43-induced; ketoconazole-induced; amphotericin B, caspofungin repressed; possibly essential gene, disruptants not obtained by UAU1 method; Spider biofilm repressed	-1.522	0.65703	0.02421
orf19.2451	PGA45	Putative GPI-anchored cell wall protein; repressed in core caspofungin response; Hog1-induced; regulated by Ssn6; Mob2-dependent hyphal regulation; flow model biofilm induced	-1.52189	0.65708	0.18715
orf19.781	DUR3	High affinity spermidine transporter; expression is induced by urea; fungal-specific (no human or murine homolog); not required for virulence in a mouse intravenous model	-1.52051	0.65767	0.03475
orf19.1709	0	Sterol carrier domain protein; alkaline downregulated; colony morphology-related gene regulation by Ssn6; Spider biofilm induced	-1.51928	0.65821	0.03218
orf19.2842	GZF3	GATA-type transcription factor; oxidative stress-induced via Cap1; mutant has abnormal colony morphology and altered sensitivity to fluconazole, LiCl, and copper; Spider biofilm induced	-1.51426	0.66039	0.05292
orf19.7521	REP1	Protein involved in negative regulation of MDR1 transcription; mutants show increased resistance to azole drugs	-1.51398	0.66051	0.27225
orf19.5255	PXA2	Putative peroxisomal, half-size adrenoleukodystrophy protein (ALD or ALDp) subfamily ABC transporter; Gcn4p-regulated	-1.51303	0.66093	0.06176
orf19.1203.1	DPM2	Dolichol-phosphate mannose synthase subunit, not essential for enzyme activity; flow model and Spider biofilm repressed	-1.50953	0.66246	0.01954
orf19.1168	ZCF3	Zn(II)2Cys6 domain transcription factor; required for filamentous growth, resistance to rapamycin and flucytosine; possibly an essential gene, disruptants not obtained by UAU1 method; Hap43-repressed; Spider and flow model biofilm induced	-1.50918	0.66261	0.18438
orf19.2397.3	0	Putative aminotransferase; Hap43-repressed; homozygous Tn insertion decreases colony wrinkling in filament-inducing conditions, does not block true hypha formation in liquid media; rat catheter and Spider biofilm induced	-1.50797	0.66314	0.00336
orf19.7281	PDK2	Putative pyruvate dehydrogenase kinase; mutation confers hypersensitivity to amphotericin B	-1.50793	0.66316	0.01733
orf19.1055	CDC3	Septin; essential for viability; functional homolog of S. cerevisiae Cdc3p; down-regulation associated with azole resistance; macrophage/pseudohyphal-repressed; virulence-group-correlated expression; gene has intron	-1.50749	0.66335	0.00594
orf19.538	GPI2	Subunit of the GPI-N-acetylglucosaminyl transferase (GPI-GnT) that catalyzes the first step in GPI anchor biosynthesis	-1.50641	0.66383	0.05621
orf19.4405	PPS1	Putative dual specificity protein phosphatase, similar to S. cerevisiae Pps1p; mutant shows virulence defect	-1.50559	0.66419	0.05564
orf19.2367	0	Putative protein of unknown function; Hap43-induced; repressed by Rim101; Spider biofilm induced	-1.50477	0.66455	0.36647
orf19.271	ADH4	Predicted 3-hydroxyacyl-CoA dehydrogenase; transcript is increased in azole-resistant strain overexpressing MDR1; transcript is increased in populations of cells exposed to fluconazole over multiple generations; mutant is viable	-1.50317	0.66526	0.12622
orf19.5059	GCS1	Gamma-glutamylcysteine synthetase; glutathione synthesis, required for virulence;induced in low iron, H2O2, Cd, or presence of human neutrophils; possibly adherence-induced; Spider and F-12/CO2 biofilm induced	-1.50169	0.66592	0.03941
orf19.1477	0	Protein of unknown function; possible ER protein; Hap43p-repressed; Spider biofilm induced	-1.50098	0.66623	0.32424
orf19.4524	ZCF24	Predicted Zn(II)2Cys6 transcription factor; caspofungin induced; Hap43-repressed	-1.49905	0.66709	0.08274
orf19.5117	OLE1	Fatty acid desaturase, essential protein involved in oleic acid synthesis; required for aerobic hyphal growth and chlamydospore formation; subject to hypoxic regulation; fluconazole-induced; caspofungin repressed; Hap43p-induced	-1.49556	0.66864	0.0656
orf19.3496	CHC1	Clathrin heavy chain; subunit of the major coat protein; role in intracellular protein transport and endocytosis; flow model and rat catheter biofilm repressed	-1.49451	0.66912	0.02238
orf19.265	0	Protein with a ribonuclease III domain; flow model biofilm induced; Spider biofilm induced	-1.49222	0.67014	0.10301
orf19.2507	ARP9	Protein similar to S. cerevisiae Arp3p, a component of the Arp2/3 complex involved in actin-dependent processes; likely to be essential for growth, based on an insertional mutagenesis strategy	-1.48974	0.67126	0.20059
orf19.2460	0	Protein of unknown function; substrate for Kex2 processing in vitro; repressed by alpha pheromone in SpiderM medium; Spider biofilm induced; Bcr1-repressed in a/a RPMI biofilms	-1.48958	0.67133	0.31228
orf19.7520	POT1	Putative peroxisomal 3-oxoacyl CoA thiolase; transcript regulated by Nrg1 and Mig1; farnesol regulated; Hap43-repressed	-1.48896	0.67161	0.21092
orf19.1416	COX11	Cytochrome oxidase assembly protein; transcript regulated by Nrg1; protein repressed during the mating process; Hap43-repressed gene; rat catheter biofilm induced	-1.48871	0.67172	0.03897
orf19.4174	0	Ortholog(s) have nicotinamide riboside transmembrane transporter activity, nucleobase transmembrane transporter activity and role in nicotinamide riboside transport, nucleobase transport, transmembrane transport	-1.48691	0.67254	0.06599
orf19.2340	CDC48	Putative microsomal ATPase; plasma membrane-localized; regulated by Gcn2 and Gcn4; induced by amino acid starvation (3-AT); macrophage/pseudohyphal-repressed; protein levels decrease in stationary phase yeast; Spider biofilm repressed	-1.47966	0.67583	0.07007
orf19.1064	ACS2	Acetyl-CoA synthetase; antigenic during human and murine infection; induced by Efg1; macrophage-induced protein; soluble protein in hyphae; gene contains intron; flow model and Spider biofilm repressed	-1.47833	0.67644	0.00081
orf19.6867	0	Protein with a predicted cytochrome b5-like heme/steroid binding domain; repressed by alpha pheromone in SpiderM medium	-1.47428	0.6783	0.01843
orf19.1307	0	Predicted membrane protein; rat catheter biofilm induced	-1.47404	0.67841	0.0573
orf19.346	ALT1	Putative alanine transaminase; mutation confers hypersensitivity to 5-fluorocytosine (5-FC); rat catheter and flow model biofilm induced	-1.47186	0.67941	0.15618
orf19.893	PGA17	Putative GPI-anchored protein; exogenously expressed protein substrate for Kex2 processing in vitro; repressed by alpha pheromone in SpiderM medium; macrophage-induced; induced in oralpharyngeal candidiasis; Spider biofilm induced	-1.47052	0.68003	0.2863
orf19.7313	SSU1	Protein similar to S. cerevisiae Ssu1 sulfite transport protein; Tn mutation affects filamentous growth; regulated by Gcn2 and Gcn4; induced by nitric oxide; Hap43-repressed; Spider and flow model biofilm induced	-1.46635	0.68197	0.02371
orf19.5215	TES15	Putative acyl-CoA thioesterase; Hap43-repressed; Spider biofilm induced	-1.4652	0.6825	0.08807
orf19.1719	SGA1	Putative glucoamylase; induced in oralpharyngeal candidasis; rat catheter and Spider biofilm induced	-1.46518	0.68251	0.06941
orf19.376	0	Protein of unknown function; Hap43-repressed; Spider biofilm induced	-1.46124	0.68435	0.15389
orf19.6645	HMO1	HMG-box transcription factor; binds upstream of hexose and ergosterol metabolism and cell cycle genes; activates pseudohyphal growth when expressed in S. cerevisiae; repressed in hyphae; Spider biofilm repressed	-1.45905	0.68538	0.18676
orf19.2125	0	Protein of unknown function; GlcNAc-induced protein; Spider biofilm induced; rat catheter biofilm repressed	-1.45868	0.68555	0.00622
orf19.1150	0	GATA-like transcription factor; oral infection induced; mutant has reduced capacity to damage oral epithelial cells; regulated by Gcn2 and Gcn4; Spider biofilm induced	-1.45775	0.68599	0.18881
orf19.7599	UTP5	Putative U3 snoRNA-associated protein; Hap43p-induced gene; mutation confers resistance to 5-fluorocytosine (5-FC), 5-fluorouracil (5-FU), and tubercidin (7-deazaadenosine); physically interacts with TAP-tagged Nop1p	-1.45713	0.68628	0.05319
orf19.4035	PGA4	GPI-anchored cell surface protein; beta-1,3-glucanosyltransferase with similarity to the A. fumigatus GEL family; transcript induced in RHE model of oral candidiasis; fluconazol-induced	-1.45671	0.68648	0.05241
orf19.2098	ARO8	Aromatic transaminase of the Ehrlich fusel oil pathway of aromatic alcohol biosynthesis; Rim101 independent alkaline induction; protein abundance affected by URA3 expression in CAI-4 strain; Gcn4-regulated; stationary phase enriched	-1.45656	0.68655	0.04678
orf19.88	ILV5	Ketol-acid reductoisomerase; antigenic; regulated by Gcn4; GlcNAc, amino acid starvation (3-AT)-induced; macrophage-repressed protein; protein present in exponential and stationary phase; flow model and Spider biofilm repressed	-1.45567	0.68697	0.02625
orf19.4450.1	0	Protein conserved among the CTG-clade; 2 adjacent upstream SRE-1 elements; highly up-regulated in cecum-grown cells in a Cph2-dependent manner; Hap43-repressed; rat catheter, Spider and flow model biofilm induced	-1.45554	0.68703	0.04489
orf19.1994	0	Ortholog(s) have phosphatidylinositol-3-phosphate binding activity, role in retrograde transport, endosome to Golgi and endosome localization	-1.45424	0.68765	0.15531
orf19.7297	0	Putative cystathionine gamma-synthase; decreased levels in stationary phase cultures; Hog1p-induced; Gcn4p-regulated	-1.4528	0.68833	0.11833
orf19.6323	HPA2	Ortholog(s) have D-amino-acid N-acetyltransferase activity, role in D-amino acid metabolic process, cellular detoxification of nitrogen compound and cytosol, nucleus localization	-1.45261	0.68842	0.13899
orf19.1743	ACS1	Acetyl-CoA synthetase; induced by human neutrophils; fluconazole-repressed; regulated by Nrg1/Mig1; colony morphology-related gene regulation by Ssn6; only in stationary phase cultures; rat catheter biofilm repressed, Spider biofilm induced	-1.45113	0.68912	0.03097
orf19.1297	0	Ortholog(s) have phosphatidylinositol-3-phosphate binding activity, role in CVT pathway, early endosome to Golgi transport, macroautophagy, mitophagy and endosome, extrinsic component of membrane, pre-autophagosomal structure localization	-1.4497	0.6898	0.26941
orf19.2942	DIP5	Dicarboxylic amino acid permease; mutation confers hypersensitivity to toxic ergosterol analog; induced upon phagocytosis by macrophage; Gcn4-regulated; upregulated by Rim101 at pH 8; rat catheter and Spider biofilm induced	-1.44822	0.6905	0.29907
orf19.1744	HEM4	Putative uroporphyrinogen III synthase; induced in high iron or elevated CO2; alkaline, Hap43-repressed	-1.4455	0.6918	0.03541
orf19.3482	0	Ortholog(s) have NAD+ diphosphatase activity, role in NADH metabolic process and peroxisome localization	-1.44271	0.69314	0.11668
orf19.3615	0	Protein of unknown function; induced in core caspofungin response; expression upregulated in an ssr1 null mutant; induced by nitric oxide independent of Yhb1p	-1.4385	0.69517	0.11517
orf19.4828	0	WD repeat domain protein; Hap43-repressed gene; flow model biofilm induced	-1.43816	0.69533	0.07326
orf19.2117	LEU5	Putative mitochondrial carrier protein; Hap43-repressed; rat catheter biofilm induced	-1.43637	0.6962	0.1784
orf19.1523	FMO1	Putative oxidoreductase; mutation confers hypersensitivity to toxic ergosterol analog, and to amphotericin B	-1.43394	0.69738	0.29816
orf19.1541	0	Protein with a globin-like domain; repressed by alpha pheromone in SpiderM medium; Spider biofilm induced	-1.43372	0.69749	0.30015
orf19.1427	0	Putative transporter; fungal-specific; Spider biofilm induced	-1.43345	0.69762	0.11034
orf19.7356	0	Ortholog of C. parapsilosis CDC317 : CPAR2_807080, C. dubliniensis CD36 : Cd36_85690, Candida orthopsilosis Co 90-125 : CORT_0C02090 and Candida albicans WO-1 : CAWG_02885	-1.43322	0.69773	0.01131
orf19.4862.2	PET100	Chaperone that facilitates the assembly of cytochrome c oxidase; plasma membrane protein	-1.43134	0.69865	0.03421
orf19.4056	BRG1	Transcription factor; recruits Hda1 to hypha-specific promoters; Tn mutation affects filamentation; Hap43-repressed; Spider and flow model biofilm induced; required for Spider biofilm formation; Bcr1-repressed in RPMI a/a biofilms	-1.42991	0.69934	0.05128
orf19.634	0	Ortholog of C. dubliniensis CD36 : Cd36_30370, Candida tropicalis MYA-3404 : CTRG_00536 and Candida albicans WO-1 : CAWG_01831	-1.42983	0.69939	0.09904
orf19.7498	LEU1	3-isopropylmalate dehydratase; antigenic in humans; repressed in hyphae; alkaline repressed; upregulated by human whole blood or PMNs; regulated by Sef1, Sfu1, and Hap43; rat catheter biofilm induced, Spider biofilm repressed	-1.42712	0.70071	0.01635
orf19.5443	BNA4	Putative kynurenine 3-monooxygenase, involved in NAD biosynthesis; transposon mutation affects filamentous growth; Hap43p-repressed gene; oral infection upregulated; mutants have reduced capacity to damage oral epithelial cells	-1.4268	0.70087	0.22326
orf19.2769	0	Putative protease B inhibitor; hyphal-induced expression; Cyr1p- and Ras1p-repressed	-1.42639	0.70107	0.1876
orf19.720	GST3	Glutathione S-transferase; expression regulated upon white-opaque switch; induced by human neutrophils; peroxide-induced; induced by alpha pheromone in SpiderM medium; Spider biofilm induced	-1.42502	0.70175	0.31202
orf19.3180	0	Ortholog(s) have phosphatidylinositol-4,5-bisphosphate 5-phosphatase activity, role in phosphatidylinositol dephosphorylation and endoplasmic reticulum localization	-1.42402	0.70224	0.09318
orf19.2262	0	Protein similar to quinone oxidoreductases; induced by benomyl treatment, nitric oxide; oxidative stress-induced via Cap1; stationary-phase enriched protein; Spider biofilm induced	-1.42356	0.70246	0.14248
orf19.7152	0	Protein similar to Aspergillus CYSK O-acetylserine sulfhydrylase, suggesting that C. albicans uses an O-acetyl-serine (OAS) pathway of sulfur assimilation; upregulated in biofilm; protein level decreases in stationary phase cultures	-1.42075	0.70385	0.06496
orf19.5552	0	Putative transcriptional regulator of ribonucleotide reductase genes; Spider biofilm induced	-1.42052	0.70397	0.1354
orf19.1392	0	Ortholog(s) have protein disulfide isomerase activity, protein-disulfide reductase (glutathione) activity, unfolded protein binding activity	-1.4199	0.70427	0.2002
orf19.2454	PHO87	Putative phosphate permease; transcript repressed by Rim101 at pH 8; regulated by white-opaque switch; caspofungin repressed; virulence-group-correlated expression; flow model biofilm induced	-1.41971	0.70437	0.26084
orf19.1254	SEC23	Putative GTPase-activating protein; regulated upon yeast-hypha switch; Spider biofilm repressed	-1.41936	0.70454	0.02722
orf19.6512	EXO70	Predicted subunit of the exocyst complex, involved in exocytosis; localizes to a crescent on the surface of the hyphal tip	-1.41882	0.70481	0.12797
orf19.6885	SPO7	Putative regulatory subunit of Nem1-Spo7 phosphatase holoenzyme that regulates nuclear growth by controling phospholipid biosynthesis; induced by alpha pheromone in SpiderM medium	-1.41863	0.70491	0.01463
orf19.642	0	Ortholog of C. dubliniensis CD36 : Cd36_30470, C. parapsilosis CDC317 : CPAR2_203380, Candida tenuis NRRL Y-1498 : CANTEDRAFT_117493 and Debaryomyces hansenii CBS767 : DEHA2G19228g	-1.418	0.70522	0.08011
orf19.4970	0	Protein of unknown function; Spider biofilm induced	-1.41675	0.70584	0.11763
orf19.3031	SEC62	Putative endoplasmic reticulum (ER) protein-translocation complex subunit	-1.41553	0.70645	0.05812
orf19.7381	AHR1	Zn(II)2Cys6 transcription factor; involved in regulation of adhesion genes; involved in white-opaque switch; forms complex with Mcm1; mutant is sensetive to 5-fluorocytosine and lithium chloride; Spider biofilm induced	-1.41444	0.70699	0.1788
orf19.655	PHO84	High-affinity phosphate transporter; transcript regulated by white-opaque switch; Hog1, ciclopirox olamine or alkaline induced; caspofungin, stress repressed; upregulated in RHE model; Spider and flow model biofilm induced, Hap43-induced	-1.414	0.70721	0.03689
orf19.5502	0	Ortholog of C. dubliniensis CD36 : Cd36_73420, Debaryomyces hansenii CBS767 : DEHA2A05456g, Pichia stipitis Pignal : PICST_30999 and Candida guilliermondii ATCC 6260 : PGUG_00155	-1.41188	0.70828	0.21233
orf19.5672	MEP2	Ammonium permease and regulator of nitrogen starvation-induced filamentation; 11 predicted transmembrane regions; in low nitrogen cytoplasmic C-terminus activates Ras/cAMP and MAPK signal transduction pathways to induce filamentation	-1.41033	0.70905	0.07004
orf19.6176	SEC61	ER protein-translocation complex subunit; essential; 10 predicted transmembrane regions; chimeric mutant partially functionally complements S. cerevisiae sec61 defects; Spider biofilm repressed	-1.40963	0.7094	0.05592
orf19.4736	0	Ortholog(s) have alkaline phosphatase activity, role in nicotinamide nucleotide metabolic process, protein dephosphorylation and extracellular region, fungal-type vacuole membrane localization	-1.40961	0.70942	0.09614
orf19.7343	0	Ortholog(s) have role in mRNA splicing, via spliceosome, snoRNA splicing and U4/U6 x U5 tri-snRNP complex localization	-1.40947	0.70949	0.37782
orf19.1764	0	Protein of unknown function; rat catheter and Spider biofilm induced	-1.40865	0.7099	0.00848
orf19.7288	0	Protein with predicted oxidoreductase and dehydrogenase domains; Hap43-repressed; Spider biofilm induced	-1.40836	0.71005	0.21505
orf19.2836	0	Protein with similarity to carbonic anhydrases	-1.40632	0.71108	0.0582
orf19.4633	0	Ortholog(s) have carbonyl reductase (NADPH) activity, serine 3-dehydrogenase activity and cytosol, nucleus, ribosome localization	-1.40306	0.71273	0.00291
orf19.5023	DAL7	Putative allantoate permease; mutant is viable	-1.40298	0.71277	0.12403
orf19.4807	0	Ortholog(s) have inorganic diphosphatase activity, role in aerobic respiration and mitochondrion localization	-1.40191	0.71331	0.20291
orf19.1672	0	Alpha subunit of COPI vesicle coatomer complex; role in ER to Golgi vesicle-mediated transport, retrograde vesicle-mediated transport, Golgi to ER transport; flow model biofilm repressed	-1.40179	0.71337	0.04993
orf19.3959	SSD1	Protein with role in resistance to host antimicrobial peptides; virulence role in murine infection; functional homolog of S. cerevisiae Ssd1p, which suppresses various mutant phenotypes; constitutively expressed and not cell-cycle regulated	-1.40017	0.7142	0.09031
orf19.1543	OPI1	Leucine zipper transcription factor; repressor of INO1 involved in inositol biosynthesis; functional homolog of S. cerevisiae Opi1; has putative Opi1-Sin3 interaction domain; interacts with ScSin3, but not CaSin3	-1.39992	0.71433	0.14952
orf19.1585	ZRT2	Zinc transporter; ciclopirox olamine, fluconazole, alkaline repressed; transcript induced by amphotericin B, interaction with macrophages; possibly essential (UAU1 method); induced in oralpharyngeal candidiasis; Spider biofilm induced	-1.39919	0.7147	0.06758
orf19.1599	0	Ortholog of Candida albicans WO-1 : CAWG_06018	-1.39595	0.71636	0.061
orf19.3261	ATO9	Putative fungal-specific transmembrane protein	-1.39399	0.71736	0.07784
orf19.712	KIP1	Non-essential kinesin from the bipolar (Kinesis-5) family; involved in formation of the mitotic spindle	-1.39242	0.71817	0.56192
orf19.2898	0	Ortholog(s) have borate efflux transmembrane transporter activity, role in borate transport, protein targeting to vacuole and fungal-type vacuole, plasma membrane localization	-1.39091	0.71895	0.1082
orf19.1641	0	Has domain(s) with predicted hydrolase activity, acting on carbon-nitrogen (but not peptide) bonds, in linear amides activity and role in metabolic process	-1.39017	0.71934	0.18224
orf19.1389	0	Ortholog(s) have poly(A) binding activity, role in mRNA metabolic process and cytoplasm localization	-1.38964	0.71961	0.01885
orf19.4368	0	Has domain(s) with predicted hydrolase activity and role in cellular process	-1.38916	0.71986	0.22621
orf19.2882	XUT1	Putative high-affinity, high-capacity xanthine-uric acid/H+ symporter; similar to A. nidulans UapA; member of the Nucleobase-Ascorbate Transporter/Nucleobase-Cation Symporter (NAT/NCS2) family; rat catheter biofilm induced	-1.38764	0.72065	0.04762
orf19.6257	GLT1	Putative glutamate synthase; regulated by Sef1, Sfu1, and Hap43; rat catheter biofilm repressed	-1.38751	0.72072	0.08785
orf19.6048	0	Protein of unknown function; Spider biofilm induced	-1.387	0.72098	0.24855
orf19.7027	0	Protein of unknown function; Spider biofilm induced	-1.3854	0.72181	0.14182
orf19.4461	0	Ortholog of Candida albicans WO-1 : CAWG_01005	-1.38493	0.72206	0.23461
orf19.5513	PRP45	Protein required for pre-mRNA splicing; Spider biofilm induced	-1.38403	0.72253	0.19025
orf19.6003	0	Protein of unknown function; role in intracellular signal transduction; Spider biofilm induced	-1.38389	0.7226	0.00898
orf19.2768	AMS1	Putative alpha-mannosidase; transcript regulated by Nrg1; induced during cell wall regeneration; flow model biofilm induced; Spider biofilm induced	-1.38114	0.72404	0.15811
orf19.782	0	Ortholog(s) have serine hydrolase activity, triglyceride lipase activity, role in lipid homeostasis and lipid particle localization	-1.3809	0.72416	0.31856
orf19.2781	0	Protein with predicted serine/threonine kinase and tyrosine kinase domains; possibly an essential gene, disruptants not obtained by UAU1 method; Spider biofilm induced	-1.3808	0.72422	0.08265
orf19.1751	SPT23	Protein involved in regulation of unsaturated fatty acid biosynthesis; controls the expression of the Ole1p delta-9-fatty acid desaturase	-1.38071	0.72427	0.09898
orf19.136	QDR3	Predicted membrane transporter, member of the drug:proton antiporter (12 spanner) (DHA1) family, major facilitator superfamily (MFS); Hap43p-repressed gene	-1.38062	0.72431	0.021
orf19.3633	0	Ortholog(s) have role in purine nucleobase catabolic process and cytosol, nucleus localization	-1.37905	0.72514	0.41292
orf19.1223	DBF2	Essential serine/threonine protein kinase involved in mitotic spindle formation and cytokinesis; required for septum formation, exit from mitosis, and normal hyphal morphogenesis; virulence-group-correlated expression	-1.37779	0.7258	0.26894
orf19.3518	0	Ortholog(s) have dicarboxylic acid transmembrane transporter activity, role in mitochondrial transport and mitochondrial inner membrane localization	-1.37719	0.72612	0.00507
orf19.5720	0	Predicted membrane transporter, member of the monocarboxylate porter (MCP) family, major facilitator superfamily (MFS); ketoconazole or caspofungin repressed; Spider biofilm induced	-1.37549	0.72701	0.15181
orf19.3055	MED17	Putative RNA polymerase II mediator complex subunit; possibly an essential gene, disruptants not obtained by UAU1 method	-1.3754	0.72706	0.36707
orf19.6259	0	Exosome non-catalytic core component; involved in 3'-5' RNA processing and degradation in the nucleus and cytoplasm; Spider biofilm induced	-1.375	0.72727	0.30729
orf19.6621	MHP1	Protein similar to S. cerevisiae Mhp1p, which is involved in microtubule stabilization; transposon mutation affects filamentous growth; possibly transcriptionally regulated upon hyphal formation; possibly an essential gene (by UAU1 method)	-1.37452	0.72752	0.03605
orf19.6844	ICL1	Isocitrate lyase; glyoxylate cycle enzyme; required for virulence in mice; induced upon phagocytosis by macrophage; farnesol regulated; Pex5-dependent peroxisomal localization; stationary phase enriched; rat catheter, Spider biofilm induced	-1.37298	0.72834	0.19118
orf19.558	GUT1	Putative glycerol kinase; downregulated upon adherence to polystyrene; greater mRNA abundance observed in a cyr1 homozygous null mutant than in wild type	-1.37239	0.72866	0.21817
orf19.4516	0	Ortholog(s) have tetrahydrofolylpolyglutamate synthase activity, role in one-carbon metabolic process, regulation of DNA methylation and cytosol, mitochondrion, nucleus localization	-1.36828	0.73084	0.12538
orf19.5515	0	Ortholog(s) have ribosome binding activity and role in mitochondrial respiratory chain complex III assembly, positive regulation of mitochondrial translation	-1.36746	0.73128	0.0635
orf19.3360	0	Protein of unknown function; flow model biofilm induced; Spider biofilm induced	-1.36699	0.73153	0.09561
orf19.3868	0	Dubious open reading frame	-1.36649	0.7318	0.03769
orf19.1350	0	Protein with a thioredoxin domain; predicted role in cell redox homeostasis; rat catheter and Spider biofilm induced	-1.36641	0.73184	0.06538
orf19.639.1	0	Ortholog(s) have structural constituent of ribosome activity and mitochondrial large ribosomal subunit localization	-1.36634	0.73188	0.12839
orf19.6596	0	Putative esterase; possibly transcriptionally regulated by Tac1; induced by Mnl1 under weak acid stress; protein present in exponential and stationary growth phase yeast cultures; Spider biofilm repressed	-1.36546	0.73235	0.28544
orf19.2809	CTN3	Peroxisomal carnitine acetyl transferase; no obvious metabolic, hyphal, virulence defects in Ura+ strain; induced by macrophage engulfment, hyphal growth, starvation, nonfermentable carbon sources; rat catheter, Spider biofilm induced	-1.36456	0.73283	0.0741
orf19.1805	PEX14	Ortholog(s) have peroxisome matrix targeting signal-1 binding, peroxisome matrix targeting signal-2 binding, protein binding, bridging activity	-1.3644	0.73292	0.18307
orf19.1054	0	Ortholog(s) have structural constituent of nuclear pore activity	-1.36223	0.73409	0.02715
orf19.647.3	0	Protein of unknown function; Spider biofilm induced	-1.36	0.73529	0.12359
orf19.482	RPT4	26S proteasome regulatory subunit; regulated by Gcn2p and Gcn4p; protein level decreases in stationary phase cultures	-1.35946	0.73559	0.16821
orf19.1761	0	Predicted olichyl-diphosphooligosaccharide-protein glycotransferase; role in protein N-linked glycosylation; Spider biofilm repressed	-1.35917	0.73575	0.15491
orf19.2607	0	Protein of unknown function; Spider biofilm induced	-1.35786	0.73645	0.10555
orf19.3746	OPT2	Oligopeptide transporter; induced upon phagocytosis by macrophage; macrophage/pseudohyphal-repressed after 16h; fluconazole-induced; virulence-group-correlated expression; Hap43-repressed	-1.35776	0.73651	0.19215
orf19.4947	0	Mitochondrial membrane protein of unknown function; Spider biofilm induced	-1.35718	0.73682	0.00504
orf19.7499	0	Putative nicotinic acid mononucleotide adenylyltransferase, involved in NAD salvage pathway; Spider biofilm repressed	-1.35682	0.73702	0.09471
orf19.3668	HGT2	Putative MFS glucose transporter; 20 member C. albicans glucose transporter family; 12 probable membrane-spanning segments; expressed in rich medium with 2% glucose; rat catheter and Spider biofilm induced	-1.35546	0.73776	0.10957
orf19.2060	SOD5	Cu-containing superoxide dismutase; protects against oxidative stress; induced by neutrophils, hyphal growth, caspofungin, osmotic/oxidative stress; oralpharyngeal candidiasis induced; rat catheter and Spider biofilm induced	-1.35396	0.73857	0.51702
orf19.7447	JEN1	Lactate transporter; induced by lactic acid, activated by Cat8; alkaline repressed by Rim101; localizes to plasma membrane; Spider biofilm induced	-1.35252	0.73936	0.21149
orf19.6991	PRE3	Putative beta-1 proteasome subunit; macrophage-induced protein; regulated by Gcn2p and Gcn4p; GlcNAc-induced protein	-1.35208	0.7396	0.41748
orf19.4181	SPC2	Signal peptidase complex component; role in ER protein translocation; transcript is induced upon filamentous growth	-1.35051	0.74046	0.04299
orf19.7207	DOA4	Ortholog of S. cerevisiae Doa4;, a ubiquitin hydrolase involved in recycling ubiquitin from proteasome-bound ubiquitinated intermediates; oxidative stress-induced via Cap1; mutants are viable	-1.35044	0.7405	0.1837
orf19.1052	0	Predicted histone H2B; Hap43-induced gene; Spider biofilm repressed	-1.35026	0.7406	0.07126
orf19.5226	WRS1	Putative tRNA-Trp synthetase; genes encoding ribosomal subunits, translation factors, tRNA synthetases are downregulated upon phagocytosis by murine macrophages	-1.34985	0.74082	0.23465
orf19.3839	SAP10	Secreted aspartyl protease; roles in adhesion, virulence (RHE model), cell surface integrity; distinct specificity from Sap9; at cell membrane and wall; GPI-anchored; induced in low iron; Tbf1-activated; Spider biofilm induced	-1.34926	0.74115	0.02833
orf19.2941	SCW4	Putative cell wall protein; substrate for Kex2p processing in vitro; expression regulated by white-opaque switch; alkaline repressed; possibly essential (UAU1 method); flow model biofilm induced; Spider biofilm induced	-1.34917	0.7412	0.20712
orf19.5243	TRP3	Putative bifunctional enzyme with predicted indole-3-glycerol-phosphate synthase and anthranilate synthase activities; regulated by Gcn2p and Gcn4p	-1.34899	0.7413	0.38557
orf19.695	RGS2	Protein of RGS superfamily; mutants are viable; rat catheter and Spider biofilm induced	-1.34865	0.74148	0.05377
orf19.1225	PEX22	Putative peroxin	-1.34731	0.74222	0.15189
orf19.3695	0	Ortholog(s) have diacylglycerol cholinephosphotransferase activity, ethanolaminephosphotransferase activity, role in phosphatidylcholine biosynthetic process, phosphatidylethanolamine biosynthetic process and Golgi apparatus localization	-1.34557	0.74318	0.01492
orf19.4077	MIT1	Mannosylinositol phosphorylceramide (MIPC) synthase catalytic subunit; sphingolipid biosynthesis; fluconazole, caspofungin induced; macrophage-repressed; Spider biofilm induced	-1.34541	0.74327	0.07661
orf19.4798	0	Ortholog(s) have role in establishment of protein localization to plasma membrane and mitochondrion, plasma membrane localization	-1.34538	0.74329	0.08974
orf19.6224	0	RTA domain protein; predicted role in response to stress; Spider biofilm induced	-1.3447	0.74366	0.10562
orf19.7093	HGT13	Predicted sugar transporter, involved in glycerol utilization; member of the major facilitator superfamily; 12 transmembrane; gene has intron; oxidative stress-induced via Cap1p; expressed in rich medium, 2% glucose	-1.34296	0.74462	0.17452
orf19.5732	NOG2	Putative nucleolar GTPase; repressed by prostaglandins; Hap43-induced, rat catheter and Spider biofilm induced	-1.3421	0.7451	0.02932
orf19.345	0	Succinate semialdehyde dehydrogenase; for utilization of gamma-aminobutyrate (GABA) as a nitrogen source; part of 4-aminobutyrate and glutamate degradation pathways; rat catheter biofilm induced	-1.34206	0.74512	0.10638
orf19.586	ERV46	Putative ER-derived vesicle protein; COPII-coated vesicle complex subunit; transcript induced by filamentous growth; Spider biofilm repressed	-1.34204	0.74514	0.00869
orf19.97	CAN1	Basic amino acid permease; complements lysine transport mutation; 10 predicted transmembrane regions, 3 predicted N-glycosylation sites; phagocytosis by macrophages induces transcript; rat catheter, Spider and flow model biofilm induced	-1.34082	0.74581	0.01245
orf19.5015	MYO2	Class V myosin; nonessential; sole class V myosin in C. albicans; required for WT actin cytoskeletal polarity, nuclear organization, migration, hyphal growth; conserved myosin ATPase/tail domains; Hap43-induced; flow model biofilm repressed	-1.34071	0.74588	0.03377
orf19.5640	PEX5	Pex5p family protein; required for PTS1-mediated peroxisomal protein import, fatty acid beta-oxidation; similar to S. cerevisiae Pas10p peroxisomal targeting receptor; macrophage/pseudohyphal-repressed; Hap43p-repressed	-1.33911	0.74676	0.13819
orf19.5054	0	Putative quinolinate phosphoribosyl transferase, involved in NAD biosynthesis; Hap43p-repressed gene	-1.33891	0.74688	0.0021
orf19.7305	0	Ortholog of C. dubliniensis CD36 : Cd36_34510, Candida tropicalis MYA-3404 : CTRG_05938 and Candida albicans WO-1 : CAWG_02183	-1.33883	0.74692	0.12553
orf19.7579	FGR34	Protein lacking an ortholog in S. cerevisiae; transposon mutation affects filamentous growth	-1.3386	0.74705	0.01062
orf19.791	RIM11	Ortholog of S. cerevisiae Rim11; a protein kinase involved in meiosis and sporulation in S. cerevisiae; mutant is viable	-1.33841	0.74716	0.03196
orf19.7583	ZCF39	Zn(II)2Cys6 transcription factor; mutants are viable; filament induced; required for yeast cell adherence to silicone substrate; Spider biofilm induced	-1.33793	0.74743	0.10114
orf19.1592	0	Protein of unknown function; Spider biofilm induced	-1.33792	0.74743	0.17546
orf19.6838	0	Putative protein of unknown function, transcript upregulated in clinical isolates from HIV+ patients with oral candidiasis; Spider biofilm induced	-1.33685	0.74803	0.36748
orf19.3910	0	Has domain(s) with predicted RNA binding, ribonuclease T2 activity	-1.33609	0.74845	0.06095
orf19.4781	GRP1	Protein similar to dihydroflavonol-4-reductases	-1.33579	0.74862	0.40814
orf19.2614	RSR1	RAS-related protein; GTP/GDP cycling required for wild-type polar bud site selection, hyphal growth guidance; role in systemic virulence in mouse; geranylgeranylation predicted; suppresses S. cerevisiae cdc24-4 mutant heat sensitivity	-1.33555	0.74876	0.33086
orf19.707	APG7	Ortholog(s) have Atg12 activating enzyme activity, Atg8 activating enzyme activity	-1.33517	0.74897	0.13677
orf19.610	EFG1	bHLH transcription factor; required for white-phase cell type, RPMI and Spider biofilm formation, hyphal growth, cell-wall gene regulation; roles in adhesion, virulence; Cph1 and Efg1 have role in host cytokine response; binds E-box	-1.33435	0.74943	0.09297
orf19.7178	PRE5	Alpha6 subunit of the 20S proteasome; regulated by Gcn4; induced in response to amino acid starvation (3-AT); Spider biofilm repressed	-1.33401	0.74962	0.21729
orf19.4167	0	Protein of unknown function; Spider biofilm induced	-1.334	0.74963	0.02253
orf19.1595	0	Ortholog(s) have clathrin binding activity, role in clathrin-mediated endocytosis, histone H2B ubiquitination and Dsc E3 ubiquitin ligase complex, clathrin-coated vesicle localization	-1.33376	0.74976	0.27812
orf19.7593	0	Putative asparaginase; predicted role in asparagine catabolism; Spider biofilm induced	-1.33292	0.75023	0.15907
orf19.6602	0	Ortholog(s) have role in ubiquinone-6 biosynthetic process and mitochondrial inner membrane localization	-1.33207	0.75071	0.08173
orf19.986	GLY1	L-threonine aldolase; complements glycine auxotrophy of S. cerevisiae shm1 shm2 gly1-1 triple mutant; macrophage/pseudohyphal-induced; the GLY1 locus has an RFLP and is triploid in strain SGY269; flow model biofilm induced	-1.33048	0.75161	0.13391
orf19.1853	HHT2	Putative histone H3; farnesol regulated; Hap43-induced; rat catheter and Spider biofilm repressed	-1.33028	0.75172	0.18378
orf19.2165	0	Predicted hydrolase; induced by nitric oxide	-1.32978	0.752	0.07938
orf19.7648	0	Has domain(s) with predicted antiporter activity, drug transmembrane transporter activity, role in drug transmembrane transport and membrane localization	-1.32892	0.75249	0.2526
orf19.3782	0	Predicted membrane transporter; member of the peptide-acetyl-coA transporter (PAT) family, major facilitator superfamily (MFS); induced by alpha pheromone in Spider medium	-1.32867	0.75263	0.00694
orf19.1722	0	Ortholog of Candida albicans WO-1 : CAWG_02462	-1.32791	0.75306	0.47119
orf19.1286	0	Ortholog of Candida albicans WO-1 : CAWG_04776	-1.32753	0.75328	0.5015
orf19.54	RHD1	Putative beta-mannosyltransferase required for the addition of beta-mannose to the acid-labile fraction of cell wall phosphopeptidomannan; 9-gene family memebr; regulated on yeast-hypha and white-opaque switches; Spider biofilm repressed	-1.32712	0.75351	0.14771
orf19.2903	AGO1	Putative Argonaute protein involved in RNA silencing; hyphal-induced expression; regulated by Cyr1, Ras1, Efg1, Nrg1, Tup1; rat catheter biofilm repressed	-1.32647	0.75388	0.05908
orf19.6061	0	Ortholog(s) have role in N-acylethanolamine metabolic process, N-acylphosphatidylethanolamine metabolic process and integral component of mitochondrial inner membrane localization	-1.326	0.75415	0.05452
orf19.3936	GDE1	Glycerophosphocholine phosphodiesterase; mutation confers hypersensitivity to 5-fluorouracil (5-FU); F-12/CO2 early biofilm induced	-1.32577	0.75428	0.06727
orf19.7186	CLB4	B-type mitotic cyclin; nonessential; negative regulator of pseudohyphal growth; dispensible for mitotic exit, cytokinesis; Fkh2-represed; flow model biofilm repressed; farnesol-upregulated in biofilm; reduced total RNA in clb4 mutant	-1.32409	0.75524	0.00406
orf19.5994	RHB1	Putative small G protein from the Ras superfamily involved in cell wall integrity and control of filamentous growth under nitrogen starvation	-1.32405	0.75526	0.00182
orf19.1424	0	Predicted membrane transporter, member of the oxalate:formate antiporter (OFA) family, major facilitator superfamily (MFS)	-1.32363	0.7555	0.05996
orf19.4491	ERG20	Putative farnesyl pyrophosphate synthetase involved in isoprenoid and sterol biosynthesis, based on similarity to S. cerevisiae Erg20p; likely to be essential for growth, based on an insertional mutagenesis strategy	-1.32327	0.7557	0.01589
orf19.4177	HIS5	Putative histidinol-phosphate aminotransferase; Gcn4p-regulated; protein present in exponential and stationary growth phase yeast cultures	-1.32318	0.75576	0.11538
orf19.2762	AHP1	Alkyl hydroperoxide reductase; immunogenic; fluconazole-induced; amphotericin B, caspofungin, alkaline repressed; core stress response induced; Ssk1/Nrg1/Tup1/Ssn6/Hog1 regulated; flow model biofilm induced; rat catheter biofilm repressed	-1.32301	0.75585	0.34216
orf19.6976	0	Predicted MFS membrane transporter; member of the proton coupled folate transporter/heme carrier protein family; virulence-group-correlated expression; Spider biofilm induced	-1.32266	0.75605	0.11141
orf19.842	ASR3	Adenylyl cyclase and stress responsive protein; induced in cyr1 or ras1 mutant; Spider biofilm induced	-1.32257	0.7561	0.02861
orf19.6327	HET1	Putative sphingolipid transfer protein; involved in localization of glucosylceramide which is important for virulence; Spider biofilm repressed	-1.32202	0.75642	0.25878
orf19.3315	CTA9	Protein required for normal filamentous growth; induced during the mating process; mRNA binds She3; activates transcription in 1-hybrid assay in S. cerevisiae	-1.3216	0.75666	0.16376
orf19.7328	0	Protein with a Staphylococcal nuclease domain; transcript regulated by Mig1 and Tup1; flow model and Spider biofilm repressed	-1.32106	0.75697	0.01119
orf19.6222.1	0	Ortholog of C. parapsilosis CDC317 : CPAR2_208910, Candida tenuis NRRL Y-1498 : CANTEDRAFT_114047, Debaryomyces hansenii CBS767 : DEHA2D14388g and Pichia stipitis Pignal : PICST_37629	-1.31723	0.75917	0.17149
orf19.5005	OSM2	Putative mitochondrial fumarate reductase; regulated by Ssn6p, Gcn2p, and Gcn4p; Hog1p-downregulated; stationary phase enriched protein; Hap43p-repressed gene	-1.31706	0.75927	0.09759
orf19.5782	0	Ortholog(s) have mitochondrion localization	-1.31656	0.75956	0.16549
orf19.6408	0	Putative DnaJ-like heat shock/chaperone; Hap43-repressed; Spider and F-12/CO2 biofilm induced	-1.31637	0.75967	0.20119
orf19.6720	0	P-Loop domain-containing protein of unknown function; transposon mutation affects filamentous growth; Spider biofilm induced	-1.31636	0.75967	0.05507
orf19.263.1	0	Protein of unknown function; gene has intron; Spider biofilm induced	-1.31562	0.7601	0.09619
orf19.6882	OSM1	Putative flavoprotein subunit of fumarate reductase; soluble protein in hyphae; caspofungin repressed; stationary phase enriched protein; flow model biofilm induced; Spider biofilm repressed	-1.31463	0.76067	0.01964
orf19.3749	OPT3	Oligopeptide transporter; transcript induced by macrophage phagocytosis, BSA or peptides; fluconazole-induced; induced by Rim101 at pH 8; virulence-group-correlated expression; Hap43-repressed; Spider biofilm induced	-1.31442	0.76079	0.20031
orf19.6830	0	Putative enoyl-CoA hydratase; Spider biofilm induced	-1.31367	0.76123	0.00308
orf19.7098	0	Putative protein of unknown function; Hap43-repressed; repressed by nitric oxide; Spider biofilm induced	-1.31338	0.7614	0.22964
orf19.6420	PGA13	GPI-anchored cell wall protein involved in cell wall synthesis; required for normal cell surface properties; induced in oralpharyngeal candidasis; Spider biofilm induced; Bcr1-repressed in RPMI a/a biofilms	-1.31224	0.76205	0.11345
orf19.4032	RPN5	Putative COP9 signalosome component; macrophage/pseudohyphal-repressed	-1.31184	0.76229	0.26983
orf19.7279.1	0	Protein of unknown function; Spider biofilm induced	-1.31157	0.76245	0.15733
orf19.5992	WOR2	Zn(II)2Cys6 transcription factor; regulator of white-opaque switching; required for maintenance of opaque state; Hap43-induced	-1.31054	0.76305	0.00664
orf19.3843	0	Ortholog(s) have protein transporter activity, role in filamentous growth, posttranslational protein targeting to membrane, translocation and Sec62/Sec63 complex localization	-1.30905	0.76391	0.06315
orf19.1772	0	Ortholog(s) have mitochondrion localization	-1.30826	0.76437	0.10422
orf19.2331	ADA2	Zinc finger and homeodomain transcriptional coactivator; role in cell wall integrity and in sensitivity to caspofungin; required for the normal transcriptional response to caspofungin; required for yeast cell adherence to silicone substrate	-1.30759	0.76477	0.29608
orf19.5611	0	Predicted 3-methylbutanol:NAD(P) oxidoreductase and methylglyoxal reductase (NADPH-dependent); role in ergosterol metabolic process; early stage flow model biofilm induced; Spider biofilm induced	-1.30611	0.76563	0.06074
orf19.3449.2	0	Putative mitochondrial phosphatidylglycerophosphatase (PGP phosphatase); essential for cardiolipin biosynthesis; rat catheter biofilm induced	-1.30597	0.76571	0.31282
orf19.192	0	Ortholog of C. dubliniensis CD36 : Cd36_19320, C. parapsilosis CDC317 : CPAR2_209670, Candida tenuis NRRL Y-1498 : CANTEDRAFT_113478 and Debaryomyces hansenii CBS767 : DEHA2C15136g	-1.30578	0.76583	0.04904
orf19.5445	GLO3	Putative ARF GTPase activator; role in COPI coating of Golgi vesicle, ER to Golgi vesicle-mediated transport, retrograde Golgi to ER vesicle-mediated transport; Spider biofilm repressed	-1.30511	0.76622	0.53232
orf19.7118	0	Ortholog(s) have adenylate kinase activity, nucleoside triphosphate adenylate kinase activity, role in nucleotide metabolic process and mitochondrial inner membrane, mitochondrial matrix localization	-1.30362	0.7671	0.28141
orf19.5754	0	Putative membrane protein with a predicted role in zinc ion homeostasis; Hap43-induced; fluconazole-induced; rat catheter and Spider biofilm induced	-1.30336	0.76725	0.13787
orf19.1042	POR1	Mitochondrial outer membrane porin; in detergent-resistant membrane fraction (possible lipid raft component); antigenic in human, mouse; Hap43p-induced; flucytosine-, macrophage-, farnesol- induced; fluconazole, caspofungin repressed	-1.30286	0.76754	0.03157
orf19.5827	BUB2	Ortholog(s) have GTPase activator activity	-1.30284	0.76755	0.06641
orf19.1655	PXP2	Putative acyl-CoA oxidase; enzyme of fatty acid beta-oxidation; induced during macrophage infection; opaque specific transcript; putative peroxisome targeting signal; Spider biofilm induced	-1.30272	0.76762	0.16584
orf19.3208	DAL52	Putative allantoate permease; mutant is viable; similar but not orthologous to S. cerevisiae Dal5	-1.30259	0.7677	0.27422
orf19.1061	HHT21	Putative histone H3; amphotericin B repressed; regulated by Efg1, farnesol; Hap43-induced; rat catheter and Spider biofilm repressed	-1.30219	0.76794	0.0565
orf19.1336.2	0	Ortholog(s) have role in mitochondrial respiratory chain complex assembly and mitochondrial intermembrane space, nucleus localization	-1.30217	0.76795	0.02974
orf19.7229	IML2	Protein of unknown function; early-stage flow model biofilm induced; Hap43-repressed; Spider biofilm repressed	-1.30187	0.76813	0.15011
orf19.5565	HPD1	3-hydroxypropionate dehydrogenase; involved in degradation of toxic propionyl-CoA; rat catheter and Spider biofilm induced	-1.30184	0.76814	0.08118
orf19.6310	0	Has domain(s) with predicted myosin binding activity	-1.29998	0.76925	0.35375
orf19.6255	0	Putative protein of unknown function; Hap43p-repressed gene	-1.29989	0.76929	0.35866
orf19.4718	TRP5	Predicted tryptophan synthase; identified in detergent-resistant membrane fraction (possible lipid raft component); predicted N-terminal acetylation; Gcn4p-regulated; S. cerevisiae ortholog is Gcn4p regulated; upregulated in biofilm;	-1.29908	0.76978	0.00012
orf19.2442	0	Ortholog of S. cerevisiae Shg1; a COMPASS (Set1C) complex subunit that methylates histone H3 on lysine 4 and is required in transcriptional silencing near telomeres; repressed in an azole-resistant strain overexpressing MDR1	-1.2988	0.76994	0.05449
orf19.1377	IPK2	Putative inositol polyphosphate multikinase; moderately induced at 42 deg	-1.29725	0.77086	0.06648
orf19.7001	YCK2	Plasma membrane protein similar to S. cerevisiae casein kinase I, Yck2p; null mutant has defect in damaging oral epithelial cells and in hyphal branching; transcription is activated in weak acid stress or on contact with host cells	-1.29554	0.77188	0.09294
orf19.3765	RAX2	Plasma membrane protein involved in establishment of bud sites and linear direction of hyphal growth; filament induced, repressed by Rim101, Tup1; Hap43-induced; Spider biofilm induced	-1.29519	0.77209	0.09806
orf19.4711	0	Ortholog of C. dubliniensis CD36 : Cd36_40890, C. parapsilosis CDC317 : CPAR2_401100, Candida tenuis NRRL Y-1498 : CANTEDRAFT_119698 and Debaryomyces hansenii CBS767 : DEHA2G22154g	-1.29465	0.77241	0.62424
orf19.414	RSM22	Predicted mitochondrial small ribosomal subunit; rat catheter and Spider biofilm induced	-1.29399	0.7728	0.45453
orf19.6924	HTA1	Histone H2A; repressed in fkh2 mutant; amphotericin B repressed; farnesol regulated; RNA abundance regulated by tyrosol and cell density; Hap43-induced gene; Spider biofilm repressed	-1.29315	0.77331	0.00285
orf19.7219	FTR1	High-affinity iron permease; required for mouse virulence, low-iron growth; iron, amphotericin B, caspofungin, ciclopirox, Hog1p, Sef1p, Sfu1p, and Hap43p regulated; complements S. cerevisiae ftr1 iron transport; Hap43p-repressed	-1.29292	0.77345	0.21799
orf19.640	0	Integral membrane protein of the ER; role in the synthesis of beta-1,6-glucan in the cell wall; S. cerevisiae ortholog required for cell viability; Spider biofilm induced	-1.29261	0.77363	0.13264
orf19.4548	MAK32	Putative protein involved in the structural stability of L-A double-stranded RNA-containing particles; downregulated upon adherence to polystyrene	-1.29214	0.77391	0.05751
orf19.1232	VRG4	GDP-mannose transporter; essential; required for glycosylation, hyphal growth; functional homolog of S. cerevisiae Vrg4p, which imports GDP-mannose from cytoplasm to Golgi for protein and lipid mannosylation; no mammalian homolog	-1.29152	0.77428	0.12113
orf19.5587	0	Protein of unknown function; transcript is upregulated in clinical isolates from HIV+ patients with oral candidiasis	-1.29134	0.77439	0.41608
orf19.4240	0	Ortholog(s) have role in GPI anchor biosynthetic process, cellular manganese ion homeostasis and endoplasmic reticulum, fungal-type vacuole membrane localization	-1.29008	0.77514	0.47671
orf19.1860	LSC2	Putative succinate-CoA ligase beta subunit; regulated by Mig1, Tup1; induced in high iron; protein present in exponential and stationary growth phase yeast cells; Spider biofilm repressed	-1.28964	0.77541	0.0454
orf19.3803	MNN22	Alpha-1,2-mannosyltransferase; required for normal cell wall mannan; regulated by Tsa1, Tsa1B at 37 deg; repressed in core stress response; NO, Hog1 induced; confers sensitivity to cell wall perturbing agents; Spider biofilm repressed	-1.28944	0.77553	0.6216
orf19.4679	AGP2	Amino acid permease; hyphal repressed; white-opaque switch regulated; induced in core caspofungin response, during cell wall regeneration, by flucytosine; regulated by Sef1, Sfu1, and Hap43; rat catheter and Spider biofilm induced	-1.28943	0.77554	0.02582
orf19.2515	0	ZZ-type zinc finger protein; rat catheter and Spider biofilm induced	-1.2892	0.77568	0.24047
orf19.3744	CEX1	Ortholog(s) have tRNA binding activity, role in tRNA export from nucleus and cytoplasm, nuclear pore localization	-1.28901	0.77579	0.13331
orf19.4171	0	Has domain(s) with predicted ATP binding activity	-1.28884	0.77589	0.38435
orf19.964	SMC4	Ortholog(s) have ATPase activity, chromatin binding activity, role in DNA unwinding involved in DNA replication, mitotic chromosome condensation, rDNA condensation, tRNA gene clustering and cytosol, nuclear condensin complex localization	-1.2887	0.77598	0.43227
orf19.1275	GAT1	GATA-type transcription factor; regulator of nitrogen utilization; required for nitrogen catabolite repression and utilization of isoleucine, tyrosine and tryptophan N sources; required for virulence in a mouse systemic infection model	-1.28857	0.77606	0.09255
orf19.7368	0	Ortholog(s) have mRNA binding, poly(U) RNA binding activity and role in nuclear-transcribed mRNA catabolic process, nonsense-mediated decay, regulation of mRNA stability, stress granule assembly	-1.28778	0.77653	0.00635
orf19.1600	0	Ortholog of C. dubliniensis CD36 : Cd36_23530, C. parapsilosis CDC317 : CPAR2_406140, Candida tenuis NRRL Y-1498 : CANTEDRAFT_116829 and Debaryomyces hansenii CBS767 : DEHA2B01826g	-1.28755	0.77667	0.11987
orf19.1960	CLN3	G1 cyclin; depletion abolishes budding and causes hyphal growth defects; farnesol regulated, functional in S. cerevisiae; possibly essential (UAU1 method); other biofilm induced; Spider biofilm induced	-1.28706	0.77697	0.04266
orf19.7601	0	Putative mitochondrial 2' O-ribose methyltransferase; predicted role in methylation of U(2791) in 21S rRNA; Spider biofilm induced	-1.28698	0.77701	0.07438
orf19.1841	0	Protein of unknown function; Hap43-induced gene	-1.2857	0.77779	0.61185
orf19.2439.1	0	Ortholog(s) have ubiquinol-cytochrome-c reductase activity, role in aerobic respiration, mitochondrial electron transport, ubiquinol to cytochrome c and mitochondrial respiratory chain complex III localization	-1.28568	0.7778	0.21788
orf19.2962	0	Protein of unknown function; Spider biofilm induced	-1.28463	0.77843	0.12015
orf19.2038	0	Protein of unknown function; Spider biofilm induced	-1.28399	0.77882	0.01577
orf19.4941	TYE7	bHLH transcription factor; control of glycolysis; required for biofilm formation; hyphally regulated by Cph1, Cyr1; flucytosine, Hog1 induced; amphotericin B, caspofungin repressed; induced in flow model biofilm and planktonic cultures	-1.28356	0.77908	0.00601
orf19.1978	GIT2	Putative glycerophosphoinositol permease; fungal-specific; repressed by alpha pheromone in SpiderM medium; Hap43-repressed; Spider biofilm induced	-1.28352	0.77911	0.11136
orf19.637	SDH2	Succinate dehydrogenase, Fe-S subunit; localizes to surface of yeast cells, but not hyphae; induced in high iron and during log phase aerobic growth; repressed by nitric oxide, Hap43	-1.28251	0.77972	0.12033
orf19.5203	0	Protein of unknown function; Hap43-induced gene	-1.28232	0.77984	0.47784
orf19.4630	CPA1	Putative carbamoyl-phosphate synthase subunit; alkaline repressed; rat catheter, Spider and flow model biofilm induced	-1.2823	0.77985	0.06732
orf19.6470	AHP2	Putative thiol-specific peroxiredoxin; macrophage-downregulated gene	-1.28195	0.78006	0.08578
orf19.7245	0	Ortholog(s) have tRNA-5-taurinomethyluridine 2-sulfurtransferase activity, role in mitochondrial tRNA wobble position uridine thiolation and mitochondrion localization	-1.28095	0.78067	0.11276
orf19.635	0	Protein of unknown function; induced by alpha pheromone in SpiderM medium	-1.28025	0.7811	0.05125
orf19.4591	CAT2	Major carnitine acetyl transferase; intracellular acetyl-CoA transport; localized in peroxisomes and mitochondria; induced in macrophages; Hog1-repressed; stationary phase enriched; farnesol-upregulated in biofilm; Spider biofilm induced	-1.27989	0.78132	0.12645
orf19.649	0	Ortholog of C. dubliniensis CD36 : Cd36_30530, C. parapsilosis CDC317 : CPAR2_203340, Candida tenuis NRRL Y-1498 : CANTEDRAFT_117008 and Debaryomyces hansenii CBS767 : DEHA2G24244g	-1.27989	0.78132	0.17903
orf19.1089	PEX11	Putative peroxisomal membrane protein; role in fatty acid oxidation; expression is Tac1-regulated; Hms1p-dependent induction by geldamycin; Spider biofilm induced	-1.27948	0.78157	0.02602
orf19.2680	0	Ortholog(s) have phospholipid-translocating ATPase activity and role in intracellular protein transport, phospholipid translocation, response to pheromone involved in conjugation with cellular fusion	-1.27903	0.78184	0.22831
orf19.3181.1	0	Protein of unknown function; involved in secretion of proteins that lack classical secretory signal sequences; Spider biofilm induced	-1.27872	0.78203	0.00122
orf19.3684	0	Putative oxidoreductase; Spider biofilm induced	-1.2784	0.78223	0.04376
orf19.202	CDC47	Phosphorylated protein described as having role in control of cell division; RNA abundance regulated by tyrosol and cell density; merged with orf19.201 in Assembly 20; unmerged from orf19.201 in a revision of Assembly 21	-1.27814	0.78239	0.16997
orf19.2253	0	Protein of unknown function; expression regulated by white-opaque switch; repressed by alpha pheromone in SpiderM medium; Spider biofilm induced	-1.27797	0.78249	0.28764
orf19.7469	ARG1	Argininosuccinate synthase; arginine synthesis; Gcn4, Rim101 regulated; induced by amino acid starvation (3-AT), benomyl treatment; stationary phase enriched protein; repressed in alkalinizing medium; rat catheter, Spider biofilm induced	-1.27733	0.78289	0.05018
orf19.5125	0	Protein of unknown function; induced by ketoconazole; Spider, F-12/CO2 and flow model biofilm induced	-1.27606	0.78367	0.06393
orf19.1170	ARO7	Putative chorismate mutase; fungal-specific (no human or murine homolog); alkaline upregulated	-1.27579	0.78383	0.20718
orf19.6791	HHT1	Putative histone H3; reduced mRNA abundance in fkh2 mutant; farnesol regulated; Spider biofilm induced; rat catheter biofilm repressed	-1.27511	0.78424	0.28857
orf19.3439	0	Protein of unknown function; Cyr1-repressed; rat catheter and Spider biofilm induced	-1.27464	0.78454	0.04494
orf19.5641	CAR2	Ornithine aminotransferase; arginine metabolism; alkaline induced; mutant sensitivite to toxic ergosterol analog, to amphotericin B; exponential and stationary phase yeast; flow model biofilm induced; rat catheter, Spider biofilm repressed	-1.27365	0.78515	0.11041
orf19.2633.1	0	Ortholog of C. dubliniensis CD36 : Cd36_00150 and Lodderomyces elongisporus NRLL YB-4239 : LELG_01269	-1.2727	0.78573	0.11269
orf19.1754	CMK2	Putative calmodulin-dependent protein kinase; involved in cell wall integrity and oxidative stress response	-1.27221	0.78603	0.10087
orf19.4527	HGT1	High-affinity MFS glucose transporter; induced by progesterone, chloramphenicol, benomyl; likely essential for growth; protein newly produced during adaptation to the serum; rat catheter and Spider biofilm induced	-1.27197	0.78618	0.03708
orf19.1058	0	Ortholog(s) have ubiquitin binding activity, role in ubiquitin-dependent protein catabolic process and proteasome regulatory particle, lid subcomplex, proteasome storage granule localization	-1.27197	0.78618	0.03315
orf19.2946	HNM4	Putative choline permease; fungal-specific (no human or murine homolog)	-1.27192	0.78621	0.32293
orf19.2751	0	Predicted membrane transporter; member of the monocarboxylate porter (MCP) family, major facilitator superfamily; Hap43-induced gene; alkaline upregulated by Rim101; possibly an essential gene, disruptants not obtained by UAU1 method	-1.27188	0.78624	0.15145
orf19.6024	0	Ortholog of C. dubliniensis CD36 : Cd36_00770, Candida tenuis NRRL Y-1498 : CANTEDRAFT_112621, Debaryomyces hansenii CBS767 : DEHA2D09812g and Pichia stipitis Pignal : PICST_61958	-1.27155	0.78644	0.21519
orf19.5843	SRR1	Two-component system response regulator; involved in stress response; Plc1-regulated; upregulated in cyr1 null mutant; flow model biofilm induced; Spider biofilm induced	-1.27154	0.78645	0.76858
orf19.2444	CHS7	Protein required for wild-type chitin synthase III activity; similar to (but not functional homolog of) S. cerevisiae Chs7p, which effects ER export of Chs3p; induced cyr1 mutant hyphae and ras1 yeast-form cells; Spider biofilm induced	-1.27106	0.78675	0.01146
orf19.2452	0	Protein of unknown function; induced in high iron; repressed in core caspofungin response; ketoconazole-repressed; colony morphology-related gene regulation by Ssn6; possibly subject to Kex2 processing	-1.27101	0.78678	0.23309
orf19.4866	CPP1	VH1 family MAPK phosphatase; regulates Cst20-Hst7-Cek1-Cph1 filamentation pathway; represses yeast-hyphal switch; required for virulence in mice; yeast-enriched; induced by alpha pheromone in SpiderM medium; Spider biofilm induced	-1.2704	0.78715	0.05787
orf19.5251	ZCF30	Predicted Zn(II)2Cys6 transcription factor; mutants are viable; repressed by fluphenazine; Spider biofilm induced	-1.27003	0.78738	0.04693
orf19.4531	ROA1	Putative PDR-subfamily ABC transporter involved in sensitivity to azoles; Spider biofilm induced	-1.26894	0.78806	0.1032
orf19.5447	HGT19	Putative MFS glucose/myo-inositol transporter; 20 member family; 12 transmembrane segments, extended N terminus; expressed in rich medium; Hap43, phagocytosis, rat catheter, Spider and flow model biofilm induced	-1.26867	0.78823	0.664
orf19.4776	LYS143	Zn(II)2Cys6 transcription factor; ortholog of S. cerevisiae Lys14 involved in the regulation of lysine biosynthesis genes	-1.26852	0.78832	0.24375
orf19.1633	UTP4	Putative U3 snoRNA-associated protein; Hap43-induced; physically interacts with TAP-tagged Nop1; Spider biofilm induced	-1.26813	0.78856	0.00846
orf19.1124	0	Protein of unknown function; flow model biofilm induced; Spider biofilm induced	-1.26805	0.78861	0.10561
orf19.5307	JEN2	Dicarboxylic acid transporter; regulated by glucose repression; induced by Rgt1; disruptants not obtained by UAU1 method; rat catheter and Spider biofilm induced	-1.26751	0.78895	0.25714
orf19.5250	0	Has domain(s) with predicted cofactor binding activity	-1.2665	0.78958	0.06245
orf19.6637	0	Predicted glycosyl hydrolase; hypoxia induced; flow model biofilm induced	-1.26547	0.79022	0.30505
orf19.2533.1	0	Protein with a predicted role in protein translocation from the endoplasmic reticulum	-1.26508	0.79046	0.02792
orf19.1891	42461	Vacuolar aspartic proteinase; transcript equivalent in yeast-form and mycelial cells but is elevated at lower growth temperatures; upregulated iby human neutrophils; protein enriched in stationary phase; Spider biofilm induced	-1.26505	0.79049	0.2576
orf19.2237	SPR1	Putative GPI-anchored protein; similar but not orthologous to S. cerevisiae Spr1, a sporulation-specific exo-1,3-beta-glucanase; mutant is viable	-1.26485	0.79061	0.60691
orf19.6701	0	Protein with similarity to amino acid-tRNA ligase; stationary phase enriched protein; GlcNAc-induced protein	-1.26474	0.79067	0.2758
orf19.1288	FOX2	3-hydroxyacyl-CoA epimerase; fatty acid beta-oxidation; induced by phagocytosis; regulated by Mig1, by white-opaque switch, by DNA methylation; transcriptional activation by oleate requires Ctf1; rat catheter and Spider biofilm induced	-1.2639	0.7912	0.21277
orf19.6336	PGA25	Putative GPI-anchored adhesin-like protein; fluconazole-downregulated; induced in oralpharyngeal candidasis; Spider biofilm induced	-1.26376	0.79129	0.63255
orf19.1949	VPS1	Dynamin-family GTPase-related protein; induced upon adherence to polystyrene; regulated by Gcn2p and Gcn4p	-1.26346	0.79148	0.03085
orf19.4268	UTP13	Putative U3 snoRNA-associated protein; Hap43-induced; repressed in core stress response; physically interacts with TAP-tagged Nop1	-1.26323	0.79162	0.28392
orf19.4235	PDE1	Low affinity cyclic nucleotide phosphodiesterase; mediates cAMP signaling in response to glucose or intracellular acidification; macrophage-repressed; Spider biofilm induced	-1.26294	0.7918	0.29677
orf19.2757	0	Has domain(s) with predicted role in cell redox homeostasis	-1.26274	0.79193	0.63937
orf19.2008	0	Ortholog(s) have S-methyl-5-thioribose-1-phosphate isomerase activity, role in L-methionine biosynthetic process from methylthioadenosine and cytosol, nucleus localization	-1.26246	0.7921	0.26292
orf19.6639	0	Ortholog of S. cerevisiae Mdm36; mitochondrial distribution and morphology protein; Hap43-repressed gene	-1.26143	0.79275	0.13412
orf19.2890	0	Has domain(s) with predicted sugar:proton symporter activity, role in carbohydrate transport and Golgi membrane, integral component of membrane localization	-1.25995	0.79368	0.28713
orf19.4998	ROB1	Zn(II)2Cys6 transcription factor; required for Spider model biofilm formation; mutant displays abnormal colony morphology and invasive growth; caspofungin repressed; flow model biofilm induced; rat catheter biofilm repressed	-1.25958	0.79391	0.04725
orf19.1289	SCT1	Putative glycerol-3-phosphate O-acyltransferase; fungal-specific (no human or murine homolog)	-1.25899	0.79429	0.10937
orf19.7585	INO1	Inositol-1-phosphate synthase; antigenic in human; repressed by farnesol in biofilm or by caspofungin; upstream inositol/choline regulatory element; glycosylation predicted; rat catheter, flow model induced; Spider biofilm repressed	-1.25897	0.7943	0.18313
orf19.4777	DAK2	Putative dihydroxyacetone kinase; repressed by yeast-hypha switch; fluconazole-induced; caspofungin repressed; protein enriched in stationary phase yeast cultures; flow model biofilm induced; rat catheter and Spider biofilm repressed	-1.25873	0.79445	0.01676
orf19.7290	0	Ortholog(s) have RNA cap binding, chromatin binding, mRNA binding activity and role in deadenylation-dependent decapping of nuclear-transcribed mRNA	-1.2587	0.79447	0.10112
orf19.6754	0	Protein of unknown function; Spider biofilm induced	-1.25865	0.7945	0.06897
orf19.6376	PTC5	Mitochondrial protein phosphatase of the Type 2C-related family (serine/threonine-specific), involved in drug response and cadmium tolerance	-1.25812	0.79484	0.0862
orf19.1671	UTR2	Putative GPI anchored cell wall glycosidase; role in adhesion, hyphal growth on Spider (not serum) medium; chitin-binding, glycosyl hydrolase domains; induced during cell wall regeneration; mRNA in yeast-form cells; Spider biofilm induced	-1.25809	0.79486	0.02702
orf19.4060	ARO4	3-deoxy-D-arabinoheptulosonate-7-phosphate synthase; aromatic amino acid biosynthesis; GCN-regulated; feedback-inhibited by tyrosine if produced in S. cerevisiae Aro3p and Aro4p catalyze same reaction; protein decreases in stationary phase	-1.25804	0.79489	0.22212
orf19.168	0	Ortholog(s) have role in U4 snRNA 3'-end processing, exonucleolytic trimming to generate mature 3'-end of 5.8S rRNA from tricistronic rRNA transcript (SSU-rRNA, 5.8S rRNA and LSU-rRNA), more	-1.25623	0.79603	0.40163
orf19.1354	UCF1	Upregulated by cAMP in filamentous growth; induced in high iron, decreased upon yeast-hypha switch; downregulation correlates with clinical fluconazole resistance; Ras1-regulated; Hap43-repressed; flow model biofilm induced	-1.25606	0.79614	0.03834
orf19.4592	HSX11	UDP-glucose:ceramide glucosyltransferase (glucosylceramide synthase [GCS], EC 2.4.1.80); involved in glucosylceramide biosynthesis, which is important for virulence	-1.25555	0.79646	0.63127
orf19.2135	TSM1	Putative transcription initiation factor TFIID subunit; transcript is upregulated in clinical isolates from HIV+ patients with oral candidiasis; Nrg1-regulated	-1.25526	0.79665	0.12343
orf19.2002	0	Ortholog(s) have structural constituent of nuclear pore activity and role in nuclear pore organization, poly(A)+ mRNA export from nucleus, protein import into nucleus, ribosomal large subunit export from nucleus	-1.25506	0.79678	0.25452
orf19.6322	ARD	D-arabitol dehydrogenase, NAD-dependent (ArDH); enzyme of D-arabitol and D-arabinose catabolism; D-arabitol is a marker for active infection in humans; rat catheter and Spider biofilm induced	-1.25502	0.7968	0.01776
orf19.2483	RIM1	Putative single-stranded DNA-binding protein; protein level decreases in stationary phase cultures; rat catheter biofilm repressed	-1.2549	0.79687	0.02881
orf19.6091	RIM8	Beta-arrestin-like protein; involved in pH response; required for pathogenesis, activation of Rim101 and alkaline pH-induced hyphal growth; colony morphology-related gene regulation by Ssn6p negative feedback regulation target	-1.25447	0.79715	0.42079
orf19.90	0	Ortholog(s) have cytoplasm localization	-1.25394	0.79749	0.16719
orf19.1945	AUR1	Inositolphosphorylceramide (IPC) synthase; catalyzes the key step in sphingolipid biosynthesis; antifungal drug target; flow model biofilm induced; Spider biofilm induced	-1.25378	0.79759	0.14872
orf19.6793	0	Protein of unknown function; Sef1, Sfu1, and Hap43 regulated; rat catheter and Spider biofilm induced	-1.25376	0.7976	0.50987
orf19.1687	0	Ortholog of S. cerevisiae Prp43, an RNA helicase in the DEAH-box family that functions in both RNA polymerase I and polymerase II transcript metabolism; Hap43-induced gene	-1.25346	0.79779	0.00079
orf19.6771	UBI4	Ubiquitin precursor (polyubiquitin) contains 3 tandem repeats of the ubiquitin peptide that are processed to individual units; transcript induced by stress; mRNA in yeast and mycelia at similar abundance; Spider biofilm induced	-1.25295	0.79812	0.02353
orf19.3829	PHR1	Cell surface glycosidase; may act on cell-wall beta-1,3-glucan prior to beta-1,6-glucan linkage; role in systemic, not vaginal virulence (neutral, not low pH); high pH or filamentation induced; Bcr1-repressed in RPMI a/a biofilm	-1.25269	0.79828	0.3142
orf19.4269	0	Has domain(s) with predicted ATP binding, protein kinase activity and role in protein phosphorylation	-1.25246	0.79843	0.15554
orf19.6044	MOB2	Mob1/phocein domain protein of RAM signaling network; cell wall integrity; role in cell separation, cortical actin polarization; required for hyphal growth; phosphorylated by Cdc28 on hyphal induction; activates Cbk1; mRNA binds She3	-1.25234	0.79851	0.15191
orf19.3029	EHD3	Predicted 3-hydroxyisobutyryl-CoA hydrolase; mitochondrially localized; Spider biofilm induced	-1.25226	0.79856	0.28475
orf19.4914.1	BLP1	Protein of unknown function, serum-induced	-1.25191	0.79878	0.08353
orf19.3476	HRR25	Predicted protein serine/threonine kinase; Spider biofilm induced	-1.25163	0.79896	0.03749
orf19.6480	0	Ortholog(s) have role in UDP-glucose transport and COPI-coated vesicle, Golgi apparatus localization	-1.25017	0.79989	0.10603
orf19.5236	SRT1	Ortholog(s) have dehydrodolichyl diphosphate synthase activity, role in dolichol biosynthetic process, protein glycosylation and dehydrodolichyl diphosphate synthase complex, lipid particle localization	-1.24982	0.80012	0.03038
orf19.3178	0	Ortholog(s) have RNA binding activity, role in mRNA 5'-splice site recognition and U2-type prespliceosome localization	-1.24982	0.80012	0.02477
orf19.1763	IFR1	Predicted oxidoreductase/dehydrogenase; induced by nitric oxide; rat catheter and Spider biofilm induced	-1.24964	0.80023	0.04073
orf19.4787	0	Ortholog(s) have cytoplasm, nucleus localization	-1.24911	0.80057	0.15213
orf19.2891	0	Ortholog(s) have role in cellular response to oxidative stress, misfolded or incompletely synthesized protein catabolic process, protein import into peroxisome matrix and mitochondrial inner membrane localization	-1.24894	0.80068	0.05032
orf19.3642	SUN41	Cell wall glycosidase; role in biofilm formation and cell separation; possibly secreted; hypoxia, hyphal induced; caspofungin repressed; Efg1, Cph1 regulated; O-glycosylated, possible Kex2 substrate; 5'-UTR intron; Spider biofilm induced	-1.24878	0.80078	0.44504
orf19.5535	0	Predicted membrane transporter, member of the anion:cation symporter (ACS) family, major facilitator superfamily (MFS)	-1.24861	0.80089	0.29937
orf19.7327	PHO88	Protein with a role in phosphate transport; biofilm-regulated expression; amphotericin B repressed	-1.24796	0.80131	0.01943
orf19.2893	0	Protein of unknown function; regulation correlates with clinical development of fluconazole resistance; transcript is upregulated in an RHE model of oral candidiasis	-1.24754	0.80158	0.22245
orf19.1433	0	Protein of unknown function; Hap43-repressed; colony morphology-related gene regulation by Ssn6; Spider biofilm induced	-1.24684	0.80203	0.10593
orf19.4044	MUM2	Protein similar to S. cerevisiae Mum2, a protein essential for meiotic DNA replication and sporulation; induced by alpha pheromone in SpiderM medium; transcript regulated by Tup1	-1.24659	0.80219	0.13278
orf19.2615	MDL1	Putative mitochondrial, half-size MDR-subfamily ABC transporter	-1.24653	0.80223	0.04037
orf19.4455	0	Protein of unknown function; Spider biofilm induced	-1.24599	0.80257	0.06024
orf19.4101	0	Ortholog of C. parapsilosis CDC317 : CPAR2_104840, Candida tenuis NRRL Y-1498 : CANTEDRAFT_116070, Debaryomyces hansenii CBS767 : DEHA2F04994g and Pichia stipitis Pignal : psti_CGOB_00085	-1.24585	0.80266	0.12037
orf19.2328	0	Ortholog of C. dubliniensis CD36 : Cd36_10220, C. parapsilosis CDC317 : CPAR2_210530, Candida tenuis NRRL Y-1498 : CANTEDRAFT_105553 and Debaryomyces hansenii CBS767 : DEHA2G14432g	-1.24557	0.80285	0.04956
orf19.2057	0	Ortholog(s) have ATP binding, ATPase activity, metallopeptidase activity, role in protein complex assembly, signal peptide processing and m-AAA complex, mitochondrial inner boundary membrane localization	-1.24555	0.80285	0.24723
orf19.2844	APL4	Predicted gamma-adaptin, large subunit of the clathrin-associated protein (AP-1) complex; that binds clathrin and is involved in vesicle mediated transport; induced in core caspofungin response; rat catheter biofilm repressed	-1.24555	0.80286	0.08253
orf19.2233	PRE2	Putative proteasome beta-5 subunit; macrophage-induced protein	-1.24489	0.80328	0.24598
orf19.7363	KRE6	Essential beta-1,6-glucan synthase subunit; change in mRNA length, not abundance, at yeast-hypha transition; alkaline induced by Rim101, on cell wall regeneration; Spider biofilm induced; Bcr1-repressed in RPMI a/a biofilms	-1.24464	0.80344	0.04227
orf19.3761	CDC54	Putative pre-replication complex helicase subunit; transcript regulated by Nrg1 and Mig1; periodic mRNA expression, peak at cell-cycle M/G1 phase; Hap43-induced	-1.24402	0.80384	0.1402
orf19.5622	GLC3	Putative 1,4-glucan branching enzyme; fluconazole-induced; colony morphology-related gene regulation by Ssn6; stationary phase enriched protein	-1.24398	0.80387	0.00217
orf19.651	LYP1	Putative permease; amphotericin B induced; flucytosine repressed; possibly an essential gene, disruptants not obtained by UAU1 method	-1.24292	0.80455	0.10766
orf19.5431	0	Protein of unknown function; Hap43-repressed; Spider biofilm induced	-1.2428	0.80464	0.53017
orf19.6552	0	Flavin-linked sulfhydryl oxidase; predicted localization to endoplasmic reticulum lumen; involved in disulfide bond formation within the ER; Spider biofilm induced	-1.2427	0.8047	0.01025
orf19.516	0	S. cerevisiae ortholog Rft1p has role in glycolipid translocation, protein N-linked glycosylation and localizes to endoplasmic reticulum membrane; regulated by Sef1p-, Sfu1p-, and Hap43p	-1.24268	0.80471	0.24984
orf19.3697	0	Ortholog(s) have role in ascospore formation, intra-S DNA damage checkpoint, positive regulation of macroautophagy, re-entry into mitotic cell cycle after pheromone arrest and regulation of meiosis I, more	-1.24214	0.80507	0.0016
orf19.6036	RIC1	Ortholog of S. cerevisiae Ric1 guanyl-nucleotide exchange factor; mutant is viable; rat catheter biofilm repressed	-1.2421	0.80509	0.52215
orf19.2803	HEM13	Coproporphyrinogen III oxidase; antigenic; on yeast cell surface, not hyphae; iron-regulated expression; Hap43, macrophage-repressed; farnesol-induced; possibly essential; flow model biofilm induced; rat catheter, Spider biofilm repressed	-1.24146	0.8055	0.04564
orf19.260	SLD1	Sphingolipid delta-8 desaturase; catalyzes desaturation at C8 in the long-chain base moiety of ceramides in glucosylceramide synthesis, important for virulence; ketoconazole and hypoxia induced; Hap43-repressed; Spider biofilm induced	-1.24107	0.80575	0.0788
orf19.4378	PPH3	Putative catalytic subunit of protein phosphatase complex; functions with regulatory subunit Psy2p in dephosphorylation of Rad53p in response to DNA damage; dephosphorylates Rfa2p in G1 phase; ortholog of S. cerevisiae Pph3p	-1.24099	0.80581	0.32742
orf19.1985	0	Has aminoglycoside phosphotransferase and protein kinase domains; rat catheter and flow model biofilm induced	-1.24067	0.80601	0.13338
orf19.6066	0	Hexadecenal dehydrogenase; involved in the conversion of sphingosine 1-phosphate breakdown product hexadecenal to hexadecenoic acid; Spider biofilm induced	-1.24047	0.80614	0.19571
orf19.5530	NAB3	Putative nuclear polyadenylated RNA-binding protein; flucytosine repressed	-1.24032	0.80625	0.20955
orf19.250	SLC1	Putative fatty acyltransferase; protein repressed during the mating process	-1.24008	0.8064	0.03389
orf19.7349	CHS4	Activator of Chs3p chitin synthase; required for wild-type wall chitin content, but not for hyphal growth; mutant resistant to Calcofluor white; prenylation and 2 transmembrane segments predicted; functional homolog of S. cerevisiae Chs4p	-1.23977	0.8066	0.07806
orf19.6402	CYS3	Cystathionine gamma-lyase; induced by alkaline, amphotericin B, cadmium stress, oxidative stress via Cap1; possibly adherence-induced; Hog1 regulated; reduced levels in stationary phase yeast cells; Spider and flow model biofilm induced	-1.23974	0.80662	0.43113
orf19.2501	FLC1	Protein involved in heme uptake; putative FAD transporter, similar to S. cerevisiae Flc1; regulated by iron; macrophage-induced; mutant defective in filamentous growth; Spider biofilm induced	-1.23912	0.80702	0.17278
orf19.3252	DAL81	Zn(II)2Cys6 transcription factor; ortholog of S. cerevisiae Dal81, involved in the regulation of nitrogen-degradation genes; required for yeast cell adherence to silicone substrate; Spider biofilm induced	-1.23877	0.80725	0.18897
orf19.6459	DPP3	Protein similar to S. cerevisiae pyrophosphate phosphatase Dpp1; required for farnesol biosynthesis; repressed by 17-beta-estradiol, ethynyl estradiol; Spider biofilm induced	-1.23849	0.80743	0.30743
orf19.5751	ORM1	Putative endoplasmic reticulum membrane protein; Hap43p-repressed gene; mutation confers hypersensitivity to aureobasidin A	-1.23839	0.8075	0.1395
orf19.3954.1	0	Ortholog of C. parapsilosis CDC317 : CPAR2_101170, Candida tenuis NRRL Y-1498 : CANTEDRAFT_113855, Debaryomyces hansenii CBS767 : DEHA2G20240g and Pichia stipitis Pignal : psti_CGOB_00174	-1.23828	0.80757	0.01113
orf19.1386	0	Ortholog(s) have SNAP receptor activity and role in ER to Golgi vesicle-mediated transport, retrograde vesicle-mediated transport, Golgi to ER, vesicle fusion	-1.23792	0.80781	0.02597
orf19.6092	KEL1	Kelch repeat domain-containing protein; localizes to sites of polarized growth; mutant colonies exhibit slightly decreased filamentation ratio; not required for buccal epithelial cell adherence or virulence in mice	-1.23776	0.80791	0.40288
orf19.390	CDC42	Rho-type GTPase; required for budding and maintenance of hyphal growth; GGTase I geranylgeranylated; misexpression blocks hyphal growth, causes avirulence in mouse IV infection; shows actin-dependent localization to hyphal tip	-1.23759	0.80802	0.21972
orf19.3846	LYS4	Homoaconitase; regulated by Gcn4, Gcn2; induced in response to amino acid starvation (3-AT); induced by human whole blood or PMNs; Hap43-repressed; flow model and Spider biofilm repressed	-1.23732	0.8082	0.26087
orf19.4865	SAC1	Putative phosphatidylinositol phosphate (PtdInsP) phosphatase, involved in cell wall integrity and morphogenesis	-1.23714	0.80832	0.06113
orf19.5748	0	Ortholog of C. dubliniensis CD36 : Cd36_64250, Candida tenuis NRRL Y-1498 : cten_CGOB_00218, Debaryomyces hansenii CBS767 : DEHA2E19888g and Spathaspora passalidarum NRRL Y-27907 : spas_CGOB_00025	-1.23688	0.80849	0.13813
orf19.1789.1	LYS1	Saccharopine dehydrogenase (biosynthetic); enzyme of alpha-aminoadipate lysine biosynthesis pathway; functionally complements S. cerevisiae lys1 mutation; fungal-specific (no human or murine homolog)	-1.23662	0.80866	0.06652
orf19.1417	0	Ortholog of C. dubliniensis CD36 : Cd36_43970, C. parapsilosis CDC317 : CPAR2_401720, Candida tenuis NRRL Y-1498 : CANTEDRAFT_102588 and Debaryomyces hansenii CBS767 : DEHA2G16698g	-1.23592	0.80911	0.00851
orf19.113	CIP1	Possible oxidoreductase; transcript induced by cadmium but not other heavy metals, heat shock, yeast-hypha switch, oxidative stress (via Cap1), or macrophage interaction; stationary phase enriched protein; Spider biofilm induced	-1.23553	0.80937	0.12545
orf19.4337	0	Predicted membrane transporter; monocarboxylate porter (MCP) family, major facilitator superfamily (MFS); Spider biofilm induced; rat catheter biofilm repressed	-1.23529	0.80953	0.05425
orf19.6783	0	Putative geranylgeranyltransferase regulatory component	-1.23484	0.80982	0.11209
orf19.2734	0	Protein with a glucose/ribitol dehydrogenase family domain; mutants are viable	-1.23401	0.81037	0.44333
orf19.2694	TYS1	Putative tRNA-Tyr synthetase; downregulated upon phagocytosis by murine macrophages; stationary phase enriched protein; Spider biofilm repressed	-1.23394	0.81041	0.13886
orf19.316	SEC13	Putative protein transport factor; antigenic during murine systemic infection; macrophage-downregulated protein; protein level decreases in stationary phase cultures; Spider biofilm repressed	-1.23326	0.81086	0.17817
orf19.7539.1	0	Putative adhesin-like protein; transcription detected in high-resolution tiling array experiments	-1.23306	0.81099	0.58279
orf19.5835	0	Ortholog(s) have role in rRNA processing, ribosomal small subunit assembly and CURI complex, UTP-C complex, cytosol localization	-1.2322	0.81156	0.0439
orf19.7091	0	Protein of unknown function; induced by nitric oxide; Spider biofilm repressed	-1.23183	0.8118	0.25391
orf19.5941	0	Ortholog(s) have role in ER to Golgi vesicle-mediated transport and ER to Golgi transport vesicle, integral component of Golgi membrane, integral component of endoplasmic reticulum membrane localization	-1.2318	0.81182	0.42452
orf19.412	SSH1	Protein with a role in protein translocation across membranes	-1.23157	0.81197	0.00334
orf19.1298	NUP84	Ortholog(s) have structural constituent of nuclear pore activity	-1.23149	0.81202	0.0597
orf19.7509.1	ATP17	Mitochondrial ATPase complex subunit; downregulated by Efg1p; flucytosine induced; caspofungin repressed	-1.23129	0.81215	0.15291
orf19.6973	0	ATP-dependent LON protease family member; Hap43-repressed gene; regulated by Gcn2 and Gcn4; Spider biofilm induced	-1.23094	0.81239	0.42434
orf19.2039	MSF1	Putative phenylalanine-tRNA ligase; protein level decreases in stationary phase cultures; Hap43p-repressed gene	-1.23082	0.81246	0.07427
orf19.1795	PUF3	RNA-binding protein involved in regulation of mitochondrial biogenesis	-1.23076	0.81251	0.13375
orf19.1336	PUP3	Putative beta 3 subunit of the 20S proteasome; macrophage/pseudohyphal-repressed	-1.23075	0.81251	0.05154
orf19.5678	0	Has domain(s) with predicted role in peptidyl-diphthamide biosynthetic process from peptidyl-histidine and cytoplasm localization	-1.23029	0.81281	0.37672
orf19.4723	FAD1	Ortholog(s) have ATP binding, FMN adenylyltransferase activity, magnesium ion binding activity, role in FAD biosynthetic process and cytosol, nucleus localization	-1.22998	0.81302	0.43449
orf19.6983	0	Protein of unknown function; Hap43-repressed gene; repressed by nitric oxide; Spider biofilm induced	-1.22994	0.81305	0.03653
orf19.1753	PUS7	Pseudouridine synthase; catalyzes pseudouridylation in U2 snRNA, 5S rRNA, cytoplasmic tRNAs and in pre-tRNA(Tyr); F-12/CO2 early biofilm induced	-1.22986	0.8131	0.07591
orf19.7595	0	Has domain(s) with predicted dynactin complex localization	-1.22956	0.8133	0.43488
orf19.5217	TES1	Putative acyl-CoA thioesterase	-1.22941	0.8134	0.46316
orf19.979	FAS1	Beta subunit of fatty-acid synthase; multifunctional enzyme; Hap43, fluconazole-induced; amphotericin B, caspofungin repressed; macrophage/pseudohyphal-induced; flow model and Spider biofilm repressed	-1.22917	0.81356	0.40757
orf19.6809	0	Putative phosphomutase-like protein; protein present in exponential and stationary growth phase yeast; Hap43-repressed; Spider biofilm repressed	-1.22894	0.81371	0.12581
orf19.4793	0	Putative ribosome-associated protein; ortholog of S. cerevisiae Tma16; Hap43-induced gene; Spider biofilm induced	-1.22863	0.81391	0.0743
orf19.1901	MCM3	Putative DNA replication protein; periodic mRNA expression, peak at cell-cycle M/G1 phase; Spider biofilm induced	-1.22858	0.81395	0.02068
orf19.607	0	Protein involved in transcription-coupled nucleotide excision repair of UV-induced DNA lesions; Spider biofilm induced	-1.22851	0.814	0.13072
orf19.479.2	SEC22	Ortholog(s) have SNAP receptor activity and role in ER to Golgi vesicle-mediated transport, retrograde vesicle-mediated transport, Golgi to ER, vesicle fusion with Golgi apparatus	-1.22845	0.81403	0.18683
orf19.4997	KIS2	Scaffold protein of Snf1p complex; similar to S. cerevisiae Gal83p and Sip2p; interacts with Snf4p; interaction with Snf1p complex is regulated by carbon source, decreased on ethanol; N-terminal myristoylation; Hog1p-downregulated	-1.22841	0.81406	0.51903
orf19.4270	MNN13	Predicted alpha-1,3-mannosyltransferase activity with a role in protein glycosylation; regulated by Sef1p-, Sfu1p-, and Hap43p	-1.2276	0.8146	0.53826
orf19.5879	0	Has domain(s) with predicted oxidoreductase activity and role in metabolic process	-1.22742	0.81472	0.08197
orf19.5352	0	Protein with a predicted magnesium transporter domain; mutants are viable	-1.22688	0.81508	0.17267
orf19.5746	ALA1	Alanyl-tRNA synthetase; translational regulation generates cytoplasmic and mitochondrial forms; Gcn4p-regulated; repressed by amino acid starvation (3-AT); translation-related genes downregulated upon phagocytosis by murine macrophages	-1.22681	0.81512	0.03634
orf19.5487	CDC46	Putative hexameric MCM complex subunit; predicted role in control of cell division; periodic mRNA expression. peak at cell-cycle M/G1 phase; regulated by tyrosol, cell density, Plc1; repressed by alpha pheromone in SpiderM medium	-1.22635	0.81543	0.46899
orf19.4255	ECM331	GPI-anchored protein; mainly at plasma membrane, also at cell wall; Hap43, caspofungin-induced; Plc1-regulated; Hog1, Rim101-repressed; colony morphology-related regulated by Ssn6; induced by ketoconazole and hypoxia	-1.2263	0.81546	0.08097
orf19.1341	PRR2	Putative serine/threonine protein kinase; mutation confers resistance to 5-fluorocytosine (5-FC)	-1.22577	0.81581	0.55394
orf19.6548	ISU1	Protein with similarity to NifU; possible role in iron-sulfur cluster biogenesis; induced in low iron; rat catheter biofilm induced; rat catheter and Spider biofilm induced	-1.22569	0.81587	0.09778
orf19.449	0	Putative phosphatidyl synthase; stationary phase enriched protein; transcript repressed by yeast-hypha switch; Hap43-repressed; rat catheter, Spider and flow model biofilm induced	-1.22559	0.81593	0.05841
orf19.2167	0	Ortholog(s) have role in ribosomal large subunit biogenesis, ribosomal small subunit biogenesis and cytosolic large ribosomal subunit, nucleolus localization	-1.22557	0.81594	0.3052
orf19.867	0	Ortholog(s) have superoxide-generating NADPH oxidase activity, role in apoptotic process, regulation of actin cytoskeleton organization and perinuclear endoplasmic reticulum, ribosome localization	-1.22534	0.8161	0.13992
orf19.5007	ACT1	Actin; gene has intron; transcript regulated by growth phase, starvation; at polarized growth site in budding and hyphal cells; required for wild-type Cdc42 localization; unprocessed N terminus; Hap43-induced; Spider biofilm repressed	-1.22516	0.81622	0.00296
orf19.422	SPT20	Putative transcription factor; downregulated upon adherence to polystyrene; flucytosine repressed	-1.22486	0.81642	0.23207
orf19.2579	0	Msh4 ortholog of S. cerevisiae; involved in meiotic recombination and is required for normal levels of crossing over; Spider biofilm induced	-1.22476	0.81649	0.43145
orf19.922	ERG11	Lanosterol 14-alpha-demethylase; cytochrome P450 family; role in ergosterol biosynthesis; target of azole antifungals; may contribute to drug resistance; azole or flow model biofilm induced; drug treated biofilm induced; hypoxia regulated	-1.22443	0.81671	0.09212
orf19.1144	0	Protein with SEL-1 like protein domain; early-stage flow model biofilm induced	-1.22437	0.81674	0.0705
orf19.6355	0	Ortholog(s) have unfolded protein binding activity, role in ribosome biogenesis and nucleolus localization	-1.22425	0.81682	0.20442
orf19.3300	ZPR1	Protein with putative zinc finger; regulated by Gcn4p; repressed in response to amino acid starvation (3-aminotriazole treatment); upregulation correlates with clinical development of fluconazole resistance	-1.22422	0.81685	0.24152
orf19.457	0	Ortholog(s) have ubiquitin-specific protease activity and role in protein deubiquitination, ubiquitin homeostasis, ubiquitin-dependent protein catabolic process via the multivesicular body sorting pathway	-1.22388	0.81708	0.37137
orf19.4506	LYS22	Homocitrate synthase, minor isoform; repressed by nitric oxide and by hypoxia; protein level decreases in stationary phase cultures; induced by ketoconazole, Spider biofilm induced; flow model biofilm repressed	-1.22385	0.8171	0.17145
orf19.4753	PFK26	Putative 6-phosphofructo-2-kinase; protein repressed during the mating process	-1.22354	0.8173	0.45187
orf19.5026	0	C2H2 transcription factor; Spider biofilm induced	-1.22344	0.81737	0.21561
orf19.909.1	0	Ortholog of C. dubliniensis CD36 : Cd36_17965, C. parapsilosis CDC317 : CPAR2_211700, Candida tenuis NRRL Y-1498 : CANTEDRAFT_112898 and Debaryomyces hansenii CBS767 : DEHA2G05588g	-1.22339	0.8174	0.10191
orf19.4525	0	Ortholog(s) have endoplasmic reticulum, nuclear pore localization	-1.22328	0.81747	0.25184
orf19.5962	HGT4	Glucose and galactose sensor; fermentation, filamentation, virulence roles; 20-member glucose transporter family; extended C terminus; high-glucose repressed; macrophage induced; flow model biofilm repressed; Spider biofilm induced	-1.22317	0.81755	0.05773
orf19.5450	ETR1	Putative 2-enoyl thioester reductase; protein present in exponential and stationary growth phase yeast cultures; rat catheter biofilm repressed	-1.22305	0.81763	0.52131
orf19.3919	0	RNI-like superfamily domain-containing protein; early-stage flow model biofilm induced; Spider biofilm induced	-1.22286	0.81775	0.48634
orf19.137	0	Putative transferase involved in phospholipid biosynthesis; induced by alpha pheromone in SpiderM medium	-1.22268	0.81787	0.2132
orf19.6691	0	Putative ember of the multi-drug and toxin extrusion (MATE) family of the multidrug/oligosaccharidyl-lipid/polysaccharide exporter superfamily; Spider biofilm induced	-1.22264	0.8179	0.15948
orf19.5903	RAX1	Protein with a predicted role in bud site selection; hypha-induced expression; Spider biofilm induced	-1.22126	0.81883	0.52106
orf19.3205	MPRL36	Mitochondrial ribosomal protein of the large subunit; rat catheter biofilm induced	-1.22107	0.81895	0.00124
orf19.1649	RNA1	Putative GTPase-activating protein; protein level decreases in stationary phase cultures; Spider biofilm repressed	-1.22092	0.81906	0.21493
orf19.5691	CDC11	Septin; cell and hyphal morphology, agar-invasive growth, full virulence and kidney tissue invasion in mouse, but not kidney colonization, immunogenicity; hyphal and cell-cycle-regulated phosphorylation; rat catheter biofilm repressed	-1.22087	0.81909	0.18534
orf19.2481	0	Protein of unknown function; Spider biofilm induced	-1.2197	0.81987	0.03085
orf19.1867	0	Putative malate permease; induced during macrophage infection; regulated by Gcn2 and Gcn4; putative peroxisome targeting signal; Hap43-repressed; Spider biofilm induced	-1.21929	0.82015	0.04456
orf19.2334	BIG1	Endoplasmic reticulum (ER) protein; ortholog of S. cerevisiae Big1; required for beta-1,6-glucan synthesis, filamentation, adhesion, and virulence; rat catheter biofilm repressed	-1.21914	0.82025	0.08569
orf19.7385	0	CCCH zinc finger protein; Spider biofilm induced	-1.2187	0.82054	0.08264
orf19.6905	0	Ortholog of S. cerevisiae : YNL011C, C. glabrata CBS138 : CAGL0H03619g, C. dubliniensis CD36 : Cd36_71090, C. parapsilosis CDC317 : CPAR2_300420 and Candida tenuis NRRL Y-1498 : CANTEDRAFT_111980	-1.21869	0.82056	0.01133
orf19.6988	OST1	Alpha subunit of the oligosaccharyltransferase complex of the ER lumen; catalyzes asparagine-linked glycosylation of newly synthesized proteins; Spider biofilm repressed	-1.21853	0.82066	0.01531
orf19.4437	0	Ortholog(s) have ATPase activity, DNA binding, nucleosome binding, rDNA binding activity	-1.21844	0.82072	0.32042
orf19.792	0	Ortholog(s) have protein serine/threonine kinase activity, protein serine/threonine/tyrosine kinase activity, protein tyrosine kinase activity	-1.21827	0.82083	0.47936
orf19.4252	0	Ortholog(s) have protein serine/threonine kinase activity	-1.21765	0.82125	0.18617
orf19.7224	0	Ortholog(s) have ubiquitin-protein transferase activity and role in histone catabolic process, histone ubiquitination	-1.2175	0.82135	0.34905
orf19.589	VPS21	Late endosomal Rab small monomeric GTPase involved in transport of endocytosed proteins to the vacuole; involved in filamentous growth and virulence; Spider biofilm induced	-1.21689	0.82177	0.03195
orf19.3982	0	Maltase; induced during growth on sucrose; induced by alpha pheromone in SpiderM medium; early-stage flow model biofilm indced	-1.2164	0.8221	0.02516
orf19.4409	0	Ortholog(s) have nucleoside-triphosphatase activity, nucleoside-triphosphate diphosphatase activity and role in cellular response to phosphate starvation, nucleoside triphosphate metabolic process	-1.21633	0.82215	0.09492
orf19.5278	0	Protein of unknown function; Spider biofilm induced	-1.21615	0.82226	0.19295
orf19.3984	0	Protein of unknown function; induced in core caspofungin response; induced in ssr1 mutant; induced by nitric oxide independent of Yhb1; Spider biofilm induced	-1.21597	0.82239	0.09514
orf19.6849	ELC1	Putative elongin C; transcript regulated by Nrg1 and Mig1; regulated by Gcn2 and Gcn4	-1.21594	0.82241	0.03249
orf19.1776	0	Putative pantetheine-phosphate adenylyltransferase (PPAT); which catalyzes 4th step in coenzyme A biosynthesis from pantothenate; rat catheter biofilm repressed	-1.21585	0.82247	0.09342
orf19.6009	SET1	Lysine histone methyltransferase; methylates histone H3 K4; regulates of white-opaque switch, epithelial cell adhesion, agar-embedded filamentation, virulence in mice; unique N-terminus immunogenic in human; rat catheter biofilm repressed	-1.21578	0.82252	0.41304
orf19.1375	LEU42	Putative alpha-isopropylmalate synthase; fungal-specific; induced by human blood or polymorphonuclear cells; regulated by Gcn2 and Gcn4; stationary phase enriched protein; Spider biofilm induced	-1.21543	0.82276	0.27227
orf19.7365	0	Ortholog(s) have ubiquitin-protein transferase activity and role in negative regulation of apoptotic process, negative regulation of gluconeogenesis, proteasome-mediated ubiquitin-dependent protein catabolic process	-1.21537	0.8228	0.16438
orf19.1476	0	Ortholog(s) have mRNA (N6-adenosine)-methyltransferase activity, role in mRNA methylation, meiotic nuclear division, negative regulation of pseudohyphal growth and MIS complex localization	-1.21468	0.82326	0.48508
orf19.85	GPX2	Similar to glutathione peroxidase; induced in high iron; alkaline induced by Rim101; induced by alpha factor or interaction with macrophage; regulated by Efg1; caspofungin repressed; Spider biofilm induced	-1.21458	0.82333	0.05029
orf19.935	AGA1	Protein with some similarity to agglutinin subunit; expression regulated upon white-opaque switch; Spider biofilm induced	-1.21453	0.82336	0.33643
orf19.275	0	Ortholog(s) have RNA binding, ribonuclease MRP activity, ribonuclease P activity	-1.21438	0.82347	0.08114
orf19.6448	0	Protein of unknown function; Spider biofilm repressed	-1.21392	0.82378	0.50763
orf19.5773	0	Putative dipeptidyl-peptidase III; protein detected by mass spec in exponential and stationary phase cultures; Hog1p-induced; clade-associated gene expression	-1.21367	0.82395	0.28089
orf19.3647	SEC8	Predicted subunit of the exocyst complex, involved in exocytosis; localizes to a crescent on the surface of the hyphal tip	-1.21343	0.82411	0.04135
orf19.506	YDJ1	Putative type I HSP40 co-chaperone; heavy metal (cadmium) stress-induced	-1.21319	0.82427	0.06789
orf19.4288	CTA7	Zn(II)2Cys6 transcription factor; activates transcription in 1-hybrid assay in S. cerevisiae; has similarity to S. cerevisiae Stb4	-1.213	0.8244	0.10055
orf19.469	HST7	MAP kinase kinase involved in mating and hyphal growth signal transduction pathways; phosphorylates Cek1p; wild-type virulence in mouse systemic infection; functional homolog of S. cerevisiae Ste7p; mutants are hypersensitive to caspofungin	-1.21288	0.82448	0.04131
orf19.7643	0	Ortholog(s) have 4-hydroxybenzoate octaprenyltransferase activity, role in ubiquinone biosynthetic process and integral component of mitochondrial membrane, mitochondrial inner membrane localization	-1.2126	0.82468	0.42817
orf19.5156	0	Protein similar to S. cerevisiae Phs1p, which is required for growth; has six putative membrane-spanning regions	-1.21217	0.82497	0.00778
orf19.2511.2	0	Ortholog of C. parapsilosis CDC317 : CPAR2_103040, Candida tenuis NRRL Y-1498 : CANTEDRAFT_116324, Debaryomyces hansenii CBS767 : DEHA2G01980g and Pichia stipitis Pignal : PICST_45936	-1.21141	0.82548	0.06641
orf19.3710	YHB5	Flavohemoglobin-related protein; not required for normal NO resistance; predicted globin/FAD-binding/NAD(P)-binding domains but lacks some conserved residues of flavohemoglobins; filament induced; rat catheter and Spider biofilm induced	-1.21137	0.82551	0.47606
orf19.166	ASG1	Gal4p family zinc-finger transcription factor with similarity to S. cerevisiae Asg1p	-1.21059	0.82605	0.25274
orf19.2568	IFU5	Predicted membrane protein; estradiol-induced; upregulation associated with CDR1 and CDR2 overexpression or fluphenazine; putative drug-responsive regulatory site; similar to S. cerevisiae Wwm1p; Hap43-repressed; Spider biofilm repressed	-1.21037	0.8262	0.5982
orf19.451	SOK1	Protein kinase required for degradation of Nrg1p; mutants are sensitive to growth on hydrogen peroxide medium; induced by alpha pheromone in SpiderM medium; rat catheter and Spider biofilm induced	-1.21021	0.8263	0.01776
orf19.4428	0	Ortholog of C. dubliniensis CD36 : Cd36_06910, C. parapsilosis CDC317 : CPAR2_208560, Candida tenuis NRRL Y-1498 : CANTEDRAFT_95854 and Debaryomyces hansenii CBS767 : DEHA2F25982g	-1.21002	0.82643	0.01069
orf19.879	0	Ortholog(s) have myosin binding activity, role in intracellular mRNA localization, mating type switching and cytoplasm localization	-1.20973	0.82663	0.25046
orf19.1591	ERG10	Acetyl-CoA acetyltransferase; role in ergosterol biosynthesis; soluble in hyphae; changes in protein abundance associated with azole resistance; fluconazole or ketoconazole induced; macrophage-downregulated protein; GlcNAc-induced protein	-1.20947	0.82681	0.01739
orf19.719	0	Ortholog(s) have ubiquitin protein ligase activity	-1.20915	0.82702	0.39118
orf19.5850	NOC2	Putative nucleolar complex protein; Hap43-induced; transposon mutation affects filamentous growth; mutation confers hypersensitivity to 5-fluorouracil (5-FU), tubercidin (7-deazaadenosine); repressed in core stress response	-1.20896	0.82715	0.00106
orf19.6706	GYP7	Protein similar to S. cerevisiae Gyp7p (GTPase-activating protein for Ypt1p); caspofungin-induced	-1.20895	0.82717	0.00322
orf19.4769	IPT1	Inositol phosphoryl transferase; catalyzes the synthesis of the most abundant sphingolipid, mannose-(inositol-P)2-ceramide, M(IP)2C, from MIPC; required for wild-type membrane localization of Cdr1; Spider biofilm induced	-1.20863	0.82738	0.1135
orf19.3680	42620	Septin, required for wild-type invasive growth in vitro but not required for virulence in a mouse model of systemic infection; localizes to hyphal septum or bud neck; Asn-rich; aberrant gel mobility; phosphorylated in vitro by Gin4p	-1.20811	0.82774	0.27263
orf19.2949	IML1	Putative protein with a role in autophagy; rat catheter biofilm induced	-1.20796	0.82784	0.37839
orf19.1249	0	Ortholog(s) have 1-(5-phosphoribosyl)-5-[(5-phosphoribosylamino)methylideneamino]imidazole-4-carboxamide isomerase activity, role in histidine biosynthetic process and cytosol, nucleus localization	-1.2074	0.82823	0.06018
orf19.1486	0	Protein with a life-span regulatory factor domain; regulated by Sef1, Sfu1, and Hap43; flow model biofilm induced; Spider biofilm induced	-1.20671	0.8287	0.07702
orf19.3215	0	Putative plasma membrane protein; in S. cerevisiae it is localized to the cell bud and mating projection membrane; repressed by alpha pheromone in SpiderM medium	-1.20663	0.82876	0.00596
orf19.5137.1	HHO1	Putative histone H1; farnesol regulated; Hap43-induced; contains 5' UTR intron; Spider biofilm repressed	-1.20619	0.82905	0.1186
orf19.111	CAN2	Basic amino acid permease; arginine metabolism; regulated by Nrg1/Tup1; caspofungin, flucytosine induced; colony morphology-related regulation by Ssn6; Hap43-repressed; rat catheter and Spider biofilm induced; promoter bound by Efg1	-1.20603	0.82917	0.08459
orf19.3763	0	Has domain(s) with predicted serine-type endopeptidase activity, role in retrograde vesicle-mediated transport, Golgi to ER and integral component of membrane localization	-1.20587	0.82928	0.18838
orf19.2853	0	Protein of unknown function; rat catheter biofilm induced	-1.2053	0.82967	0.2813
orf19.164	0	Ortholog(s) have triglyceride lipase activity, role in triglyceride catabolic process and peroxisomal matrix localization	-1.20521	0.82973	0.19279
orf19.4719	CWH41	Processing alpha glucosidase I, involved in N-linked protein glycosylation and assembly of cell wall beta 1,6 glucan; rat catheter biofilm repressed	-1.20505	0.82984	0.22298
orf19.6828.1	0	Ortholog(s) have P-P-bond-hydrolysis-driven protein transmembrane transporter activity, protein transporter activity, structural molecule activity	-1.20395	0.8306	0.18632
orf19.6566	0	Ortholog of C. dubliniensis CD36 : Cd36_71420, C. parapsilosis CDC317 : CPAR2_300980, Candida tenuis NRRL Y-1498 : CANTEDRAFT_94952 and Debaryomyces hansenii CBS767 : DEHA2A05346g	-1.20388	0.83065	0.04142
orf19.522	PIM1	ATP-dependent Lon protease; role in degradation of misfolded proteins in mitochondria, biogenesis and maintenance of mitochondria; rat catheter biofilm induced	-1.20388	0.83064	0.00893
orf19.6020	0	Ortholog(s) have Atg8 ligase activity, role in C-terminal protein lipidation, CVT pathway, autophagosome assembly, late nucleophagy, mitophagy, piecemeal microautophagy of nucleus and cytosol, nucleus localization	-1.20361	0.83083	0.07021
orf19.3426	ANB1	Translation initiation factor eIF-5A; repressed in hyphae vs yeast cells; downregulated upon phagocytosis by murine macrophage; Hap43-induced; GlcNAc-induced protein; Spider biofilm repressed	-1.20344	0.83095	0.00631
orf19.5068	IRE1	Putative protein kinase; role in cell wall regulation; mutant is hypersensitive to caspofungin; Spider biofilm induced	-1.20341	0.83097	0.22976
orf19.5039	RRP42	Putative exosome non-catalytic core component; involved in 3'-5' RNA processing; rat catheter biofilm induced	-1.20321	0.83111	0.26758
orf19.2940	0	Putative v-SNARE of the endoplasmic reticulum membrane; possibly an essential gene, disruptants not obtained by UAU1 method	-1.20313	0.83117	0.15411
orf19.3260	0	Ortholog(s) have phosphopantothenoylcysteine decarboxylase activity, role in coenzyme A biosynthetic process, response to salt stress and CoA-synthesizing protein complex, phosphopantothenoylcysteine decarboxylase complex localization	-1.20274	0.83144	0.23623
orf19.3184	0	Has domain(s) with predicted role in vesicle-mediated transport	-1.20244	0.83164	0.20165
orf19.91	0	Protein of unknown function; flow model biofilm induced; Hap43-repressed	-1.20173	0.83214	0.02003
orf19.5921	0	Ortholog(s) have glyoxysome localization	-1.20172	0.83214	0.13187
orf19.4615	0	Ortholog(s) have histone deacetylase activity	-1.20164	0.8322	0.00553
orf19.1313	CDR3	Transporter of the Pdr/Cdr family of the ATP-binding cassette superfamily; transports phospholipids out-to-in; expressed in opaque-phase cells; induced by macrophage interaction; fluconazole-repressed; Spider biofilm induced	-1.20157	0.83224	0.18361
orf19.3477	0	Putative pseudouridine synthase; predicted role in snRNA pseudouridine synthesis, tRNA pseudouridine synthesis; Spider biofilm induced	-1.20156	0.83225	0.02698
orf19.1357	FCY21	High affinity, high capacity, hypoxanthine-adenine-guanine-cytosine/H+ symporter; similar to S. cerevisiae Fcy2; mutation confers resistance to 5-fluorocytosine (5-FC); flow model biofilm induced	-1.2015	0.8323	0.09081
orf19.6025	0	Ortholog(s) have N-acetylglucosaminyldiphosphodolichol N-acetylglucosaminyltransferase activity and role in dolichol-linked oligosaccharide biosynthetic process	-1.20139	0.83237	0.23093
orf19.4872	0	Protein of unknown function; induced by Mnl1 under weak acid stress; Hap43-induced; mutant is viable	-1.20123	0.83248	0.0546
orf19.7231	FTR2	High-affinity iron permease; probably interacts with ferrous oxidase; regulated by iron level, ciclopirox olamine, amphotericin B, caspofungin; complements S. cerevisiae ftr1 iron transport defect; Hap43-repressed; Spider biofilm induced	-1.20112	0.83255	0.13168
orf19.5876	0	Protein of unknown function; Cyr1-repressed; induced by alpha pheromone in SpiderM medium; rat catheter and Spider biofilm induced	-1.2011	0.83257	0.05682
orf19.2825	DRE2	Putative cytosolic Fe-S protein assembly protein; a-specific transcript; regulated by Sef1, Sfu1, and Hap43; rat catheter and Spider biofilm induced	-1.20087	0.83273	0.07958
orf19.6912	0	Putative ethanolamine kinase	-1.20063	0.83289	0.12339
orf19.1669	AFG3	Similar to S. cerevisiae Afg3p, a subunit of the mitochondrial inner membrane m-AAA protease; likely to be essential for growth, based on an insertional mutagenesis strategy	-1.20055	0.83295	0.13887
orf19.7316	0	Putative phytanoyl-CoA dioxygenase family protein; mutation confers hypersensitivity to 5-fluorocytosine (5-FC), 5-fluorouracil (5-FU), and tubercidin (7-deazaadenosine); induced by nitric oxide	-1.19981	0.83347	0.26654
orf19.2571	SEC4	Small GTPase of Rab family; role in post-Golgi secretion; possible C-terminal palmitoylation; downregulated on adherence to polystyrene; localizes to the Spitzenkorper during hyphal growth; functional homolog of S. cerevisiae Sec4p	-1.19965	0.83358	0.24901
orf19.1720	0	Ortholog(s) have role in mitotic recombination	-1.19929	0.83383	0.25005
orf19.1047	ERB1	Protein with a predicted role in ribosomal large subunit biogenesis; mutation confers hypersensitivity to 5-fluorocytosine (5-FC), 5-fluorouracil (5-FU), and tubercidin (7-deazaadenosine); hyphal, macrophage repressed	-1.19909	0.83397	0.05079
orf19.169	CHO2	Putative phosphatidyl-ethanolamine N-methyltransferase; fungal-specific (no human or murine homolog); amphotericin B repressed; Hap43p-induced gene	-1.19903	0.83401	0.04075
orf19.7448	LYS9	Saccharopine dehydrogenase; lysine biosynthesis; soluble protein in hyphae; amphotericin B repressed; Gcn4-regulated; colony morphology-related gene regulation by Ssn6; protein present in exponential and stationary growth phase yeast	-1.19879	0.83417	0.02835
orf19.1854	HHF22	Putative histone H4; regulated by Efg1; flucytosine, fluconazole-induced; amphotericin B, caspofungin repressed; colony morphology-related gene regulation by Ssn6; Hap43-induced; rat catheter and Spider biofilm repressed	-1.19821	0.83458	0.16212
orf19.2682	0	Ortholog(s) have RNA polymerase II transcription factor activity, TBP-class protein binding, involved in preinitiation complex assembly, TBP-class protein binding activity	-1.19779	0.83487	0.05866
orf19.3350	MRP20	Component of mitochondrial ribosome; decreased expression in hyphae compared to yeast-form cells	-1.19695	0.83546	0.22625
orf19.5205	0	Protein of unknown function; Hap43-repressed gene	-1.19632	0.8359	0.15753
orf19.4190	PAM18	Predicted component of the presequence translocase-associated import motor (PAM complex) involved in protein import into mitochondrial matrix; rat catheter biofilm induced	-1.19605	0.83609	0.12824
orf19.4010	PAN3	Ortholog(s) have poly(A) RNA binding, poly(A)-specific ribonuclease activity, role in nuclear-transcribed mRNA poly(A) tail shortening, postreplication repair and PAN complex localization	-1.19565	0.83636	0.49161
orf19.2553	0	Protein similar to S. cerevisiae Pmr1p; amphotericin B induced; previously merged with orf19.2552 in Assembly 20; unmerged from orf19.2552 in a revision of Assembly 21	-1.19549	0.83648	0.1047
orf19.4951	0	Protein of unknown function; Spider biofilm induced	-1.19532	0.83659	0.02666
orf19.1614	MEP1	Ammonium permease; Mep1 more efficient permease than Mep2, Mep2 has additional regulatory role; 11 predicted transmembrane regions; low mRNA abundance; hyphal downregulated; flow model biofilm induced	-1.19523	0.83666	0.16173
orf19.5825.1	0	Ortholog(s) have role in ER to Golgi vesicle-mediated transport and ER to Golgi transport vesicle, endoplasmic reticulum membrane, integral component of Golgi membrane localization	-1.19508	0.83677	0.0926
orf19.4842	0	Protein of unknown function; Spider biofilm induced	-1.19499	0.83683	0.01566
orf19.7602	AHA1	Putative Hsp90p co-chaperone; Hap43-repressed; heavy metal (cadmium) stress-induced; oxidative stress-induced via Cap1; rat catheter biofilm induced; flow model biofilm repressed	-1.19484	0.83693	0.27951
orf19.6064	0	Ortholog(s) have phosphatidylinositol-3,5-bisphosphate binding, ubiquitin binding activity	-1.19423	0.83736	0.0731
orf19.6269	0	Ortholog of C. dubliniensis CD36 : Cd36_05990, Candida tenuis NRRL Y-1498 : CANTEDRAFT_91852, Debaryomyces hansenii CBS767 : DEHA2G15356g and Pichia stipitis Pignal : PICST_87044	-1.19382	0.83765	0.18316
orf19.6869	0	Putative lipid raft associated protein; Spider biofilm induced	-1.19347	0.8379	0.03982
orf19.2771	BEM3	Putative GTPase-activating protein (GAP) for Rho-type GTPase Cdc42p; involved in cell signaling pathways that control cell polarity; similar to S. cerevisiae Bem3p	-1.19322	0.83807	0.04624
orf19.6016	0	Ortholog(s) have GTPase activity, calcium ion binding activity and role in mitochondrion inheritance, mitochondrion-ER tethering, phospholipid homeostasis, regulation of mitochondrion organization	-1.1927	0.83843	0.58632
orf19.7577	MSS51	Putative mRNA maturation factor; fungal-specific (no human or murine homolog)	-1.19267	0.83846	0.15008
orf19.4380.1	0	Ortholog(s) have role in mitochondrial genome maintenance and integral component of mitochondrial inner membrane localization	-1.19265	0.83847	0.49446
orf19.6848	VPS16	Protein similar to S. cerevisiae Vps16p, which is involved in protein-vacuolar targeting; likely to be essential for growth, based on insertional mutagenesis; downregulated in biofilm or in azole-resistant strain that overexpresses MDR1	-1.19262	0.83849	0.07908
orf19.2097	0	Predicted DNA-dependent ATPase/helicase; Spider biofilm induced	-1.19256	0.83853	0.53111
orf19.6679	0	Ortholog(s) have cytosol, nucleus localization	-1.19191	0.83899	0.01168
orf19.7354	LAC1	Ceramide synthase; required for biosynthesis of ceramides with C18:0 fatty acids, which serve as precursors for glucosylsphingolipids; caspofungin induced	-1.19179	0.83907	0.02771
orf19.7434	GLG2	Putative self-glucosylating initiator of glycogen synthesis; expression regulated upon white-opaque switch; hypha-induced; Spider biofilm induced	-1.19158	0.83922	0.04615
orf19.5249	0	Ortholog(s) have role in macroautophagy and cytosol, nucleus, pre-autophagosomal structure localization	-1.19157	0.83923	0.26591
orf19.5418	0	Ortholog(s) have role in ER to Golgi vesicle-mediated transport and endoplasmic reticulum localization	-1.1912	0.83949	0.39418
orf19.2717	SAS10	Putative U3-containing small subunit processome complex subunit; Hap43p-induced gene; mutation confers resistance to 5-fluorocytosine (5-FC); repressed upon high-level peroxide stress	-1.19102	0.83961	0.126
orf19.3171	ACH1	Acetyl-coA hydrolase; acetate utilization; nonessential; soluble protein in hyphae; antigenic in human; induced on polystyrene adherence; farnesol-, ketoconazole-induced; no human or murine homolog; stationary phase-enriched protein	-1.19077	0.83979	0.26008
orf19.1795.1	0	Ortholog(s) have role in protein targeting to ER, signal peptide processing and signal peptidase complex localization	-1.19054	0.83996	0.1244
orf19.2400	0	Ortholog(s) have role in mRNA splicing, via spliceosome, maturation of SSU-rRNA, positive regulation of ATPase activity, positive regulation of helicase activity	-1.19023	0.84017	0.02926
orf19.5783	0	Ortholog(s) have protein-arginine omega-N monomethyltransferase activity and role in peptidyl-arginine methylation	-1.19013	0.84025	0.16303
orf19.7449	0	Ortholog(s) have role in mitochondrial genome maintenance, plasmid maintenance and cytosol, mitochondrion localization	-1.18999	0.84034	0.24025
orf19.6137	0	Has domain(s) with predicted ATP binding, ATP-dependent helicase activity, nucleic acid binding activity	-1.18984	0.84045	0.19363
orf19.5657	SWI1	Protein involved in transcription regulation; ortholog of S. cerevisiae Swi1p, which is a subunit of the SWI/SNF chromatin remodeling complex; interacts with Snf2p; SWI/SNF complex is essential for hyphal growth and virulence	-1.18969	0.84055	0.57233
orf19.7547	0	Ortholog(s) have phosphatidylinositol-3-phosphate binding, ubiquitin-protein transferase activity, role in protein ubiquitination and cytosol, fungal-type vacuole membrane, late endosome, nucleus localization	-1.18948	0.84071	0.17125
orf19.1422	FZO1	Mitochondrial biogenesis protein; rat catheter and Spider biofilm induced	-1.18944	0.84073	0.04332
orf19.2972	PDE2	High affinity cyclic nucleotide phosphodiesterase; moderates signaling by cAMP; required for virulence, switching, cell wall, hyphal, not pseudohyphal growth; expressed shortly after hyphal induction; rat catheter and Spider biofilm induced	-1.18925	0.84087	0.07204
orf19.5596	0	Ortholog(s) have ASTRA complex localization	-1.18909	0.84098	0.79189
orf19.6798	SSN6	Functional homolog of S. cerevisiae Cyc8/Ssn6; hyphal growth regulator; repressed during hyphal growth; Ssn6 and Tup1 regulate distinct sets of genes; overexpression or mutation causes avirulence in mouse IV infection; TPR motifs	-1.18883	0.84116	0.25185
orf19.5357	AKL1	Putative serine/threonine protein kinase; induced during the mating process	-1.18821	0.8416	0.27061
orf19.4407	0	Protein of unknown function; Hap43-repressed gene	-1.18811	0.84167	0.44779
orf19.4590	RFX2	Transcriptional repressor; regulator of filamentation, response to DNA damage, adhesion, virulence in murine mucosal, systemic infections; RFX domain; regulated by Nrg1, UV-induced; partially complements S. cerevisiae rfx1 mutant defects	-1.18811	0.84168	0.20001
orf19.1146	0	Ortholog of Candida albicans WO-1 : CAWG_00265	-1.18801	0.84175	0.10431
orf19.846	0	Predicted protein kinase similar to S. cerevisiae Nnk1; implicated in proteasome function in S. cerevisiae; induced by Mnl1 under weak acid stress	-1.18799	0.84176	0.71317
orf19.5758	SAL6	Putative protein phosphatase of the Type 1 family; serine/threonine-specific; similar to S. cerevisiae Ppq1; mutant has virulence defect; Spider biofilm induced	-1.18798	0.84176	0.0927
orf19.7063	THG1	tRNA guanylyltransferase, with role in tRNA modification; catalyzes reverse (3'-5') nucleotide polymerization	-1.18791	0.84181	0.40995
orf19.7437	0	Putative protein of unknown function; Hap43p-repressed gene; ortholog of S. cerevisiae YJL218W	-1.18761	0.84203	0.63812
orf19.7355	SSN8	Ortholog of S. cerevisiae Ssn8; a component of RNA polymerase II holoenzyme; mutants are viable and are sensitive to hydrogen peroxide medium	-1.18727	0.84227	0.20958
orf19.6950	0	Putative vacuolar membrane transporter for cationic amino acids; Spider biofilm induced	-1.18724	0.84229	0.14741
orf19.4883	0	Protein of unknown function; S. cerevisiae ortholog Cos111 confers resistance to the antifungal drug ciclopirox olamine; constitutive expression independent of MTL or white-opaque status; Spider biofilm induced	-1.18717	0.84234	0.02877
orf19.5516	0	Ortholog(s) have role in SRP-dependent cotranslational protein targeting to membrane, translocation and signal recognition particle, endoplasmic reticulum targeting localization	-1.18675	0.84264	0.2086
orf19.5917	STP1	Transcription factor; regulates SAP2, OPT1 expression and thereby protein catabolism for nitrogen source; activated via amino-acid-induced proteolytic processing; macrophage/pseudohyphal-repressed; Spider biofilm repressed	-1.18672	0.84266	0.22236
orf19.3449	0	Ortholog(s) have ubiquitin-protein transferase activity, role in histone catabolic process, histone ubiquitination and cytoplasm, ribosome localization	-1.18651	0.84281	0.43671
orf19.2071	0	Protein of unknown function; induced by alpha pheromone in SpiderM medium	-1.1863	0.84296	0.33957
orf19.5486	0	Putative endoribonuclease; heterozygous null mutant exhibits hypersensitivity to parnafungin and cordycepin in the C. albicans fitness test	-1.18621	0.84302	0.60717
orf19.3153	MSS4	Phosphatidylinositol-4-phosphate 5-kinase; activity induced by phosphatidic acid (Pld1 product); macrophage/pseudohyphal-repressed; mRNA binds to She3, localized to yeast cell buds and hyphal tips; Hap43-induced; Spider biofilm induced	-1.18619	0.84303	0.03585
orf19.1708	0	Protein of unknown function; Spider biofilm induced	-1.18589	0.84325	0.32284
orf19.1318	0	Ortholog of C. dubliniensis CD36 : Cd36_43350, C. parapsilosis CDC317 : CPAR2_403560, Debaryomyces hansenii CBS767 : DEHA2A08250g and Pichia stipitis Pignal : PICST_29838	-1.18584	0.84329	0.32094
orf19.1522	0	Ortholog of C. dubliniensis CD36 : Cd36_16850, C. parapsilosis CDC317 : CPAR2_211990, Candida tenuis NRRL Y-1498 : cten_CGOB_00169 and Debaryomyces hansenii CBS767 : DEHA2G03036g	-1.18579	0.84332	0.72671
orf19.3919.1	0	Putative adhesin-like protein	-1.18531	0.84366	0.02889
orf19.2961	0	Putative transcription factor with zinc finger DNA-binding motif	-1.18523	0.84372	0.58914
orf19.480	0	Protein of unknown function; rat catheter and Spider biofilm induced	-1.18474	0.84407	0.33836
orf19.4393	CIT1	Citrate synthase; induced by phagocytosis; induced in high iron; Hog1-repressed; Efg1-regulated under yeast, not hyphal growth conditions; present in exponential and stationary phase; Spider biofilm repressed; rat catheter biofilm induced	-1.18456	0.8442	0.40534
orf19.934	0	Predicted ORF from Assembly 19; removed from Assembly 20; subsequently reinstated in Assembly 21 and merged with orf19.2224, based on comparative genome analysis; flow model biofilm repressed	-1.1844	0.84431	0.68764
orf19.1638	0	Has domain(s) with predicted zinc ion binding activity, role in ER to Golgi vesicle-mediated transport, intracellular protein transport and COPII vesicle coat localization	-1.18408	0.84454	0.32001
orf19.4732	SEC24	Protein with a possible role in ER to Golgi transport; induced upon yeast-hyphal switch; sumoylation target; Spider biofilm repressed	-1.18405	0.84456	0.0774
orf19.7504	0	Ortholog of S. cerevisiae Rts3; a component of the protein phosphatase type 2A complex; Plc1-regulated; induced in core caspofungin response; Spider biofilm induced	-1.18394	0.84463	0.16489
orf19.4498	0	Ortholog of C. dubliniensis CD36 : Cd36_19120, C. parapsilosis CDC317 : CPAR2_103880, Candida tenuis NRRL Y-1498 : CANTEDRAFT_115581 and Debaryomyces hansenii CBS767 : DEHA2F08426g	-1.18381	0.84473	0.09211
orf19.2847.1	#N/A	#N/A	-1.18373	0.84479	0.386
orf19.4379	PRP13	Putative integral inner mitochondrial membrane protein with similarity to exonucleases	-1.18361	0.84487	0.4218
orf19.3131	OYE32	NAD(P)H oxidoreductase family protein; induced by nitric oxide, amphotericin B, oxidative stress via Cap1; upregulation associated with MDR1 overexpression or benomyl treatment; macrophage-downregulated protein; Spider biofilm induced	-1.18323	0.84515	0.11072
orf19.5557	MNN4-4	Mannosyltransferase; transcript upregulated in Ssk1 response regulator mutant or in nik1 null mutant, but not in chk1 or sln1 null mutants; pheromone induced; Spider biofilm induced	-1.18269	0.84553	0.15426
orf19.6305	0	Hydroxytrimethyllysine aldolase, the second enzyme in the carnitine biosynthesis pathway; rat catheter biofilm repressed	-1.18265	0.84556	0.14977
orf19.7672	0	Ortholog(s) have role in ER-associated ubiquitin-dependent protein catabolic process, endoplasmic reticulum unfolded protein response	-1.18236	0.84577	0.89789
orf19.1285	0	Plasma membrane-localized protein of unknown function; Hap43p-repressed gene	-1.18233	0.84579	0.47169
orf19.5828	0	Ortholog(s) have mRNA binding, pre-mRNA branch point binding activity, role in mRNA branch site recognition, mRNA cis splicing, via spliceosome and U2-type prespliceosome, U2AF, commitment complex localization	-1.18227	0.84583	0.37203
orf19.4979	KNS1	Protein kinase involved in negative regulation of PolIII transcription; effector kinase of the TOR signaling pathway, phosphorylates Rpc53p to regulate ribosome and tRNA biosynthesis; Spider and flow model biofilm induced	-1.1822	0.84588	0.36031
orf19.4006	0	Ortholog(s) have cytosol, nucleus localization	-1.18206	0.84598	0.14515
orf19.7029	0	Putative guanine deaminase; mutation confers hypersensitivity to toxic ergosterol analog; Spider biofilm induced	-1.18178	0.84618	0.16748
orf19.5660.1	0	Ortholog(s) have proton-transporting ATP synthase activity, rotational mechanism, structural molecule activity and role in ATP synthesis coupled proton transport, cristae formation, protein complex oligomerization	-1.18173	0.84622	0.16707
orf19.7625	PGA1	Putative GPI-anchored protein; induced during cell wall regeneration; required for normal adhesion to host cells and for adherence during Sabouraud biofilm formation; Spider biofilm induced	-1.18171	0.84623	0.3217
orf19.2549	SHP1	Regulator of the type 1 protein phosphatase Glc7p activity, involved in control of morphogenesis, progression through the cell cycle and response to DNA damage	-1.1814	0.84645	0.21161
orf19.5094	BUL1	Protein similar but not orthologous to S. cerevisiae Bul1; a protein involved in selection of substrates for ubiquitination; mutants are viable; macrophage/pseudohyphal-induced; rat catheter biofilm induced	-1.18136	0.84648	0.53192
orf19.633	CRG1	Methyltransferase involved in sphingolipid homeostasis, methylates a drug cantharidin; decreased expression in hyphae compared to yeast; expression regulated during planktonic growth; flow model biofilm induced; Hap43-repressed gene	-1.18128	0.84654	0.46734
orf19.6321	PGA48	Putative GPI-anchored adhesin-like protein; similar to S. cerevisiae Spi1p, which is induced at stationary phase; transcript induced in high iron; flow model biofilm induced; Spider biofilm repressed	-1.18097	0.84676	0.25878
orf19.1806	0	Ortholog of C. dubliniensis CD36 : Cd36_30340, C. parapsilosis CDC317 : CPAR2_203900, Candida tenuis NRRL Y-1498 : CANTEDRAFT_113094 and Debaryomyces hansenii CBS767 : DEHA2G22374g	-1.18094	0.84678	0.12918
orf19.239	0	Putative ATP-dependent helicase; induced by nitric oxide	-1.18089	0.84682	0.00023
orf19.7216	YPT52	Rab-family GTPase involved in vacuolar trafficking, colocolizes with Vps1p and Ypt53p in late endosome	-1.1807	0.84696	0.02738
orf19.4933	FAD3	Omega-3 fatty acid desaturase; production of alpha-linolenic acid, a major component of membranes; caspofungin induced; Plc1-regulated; colony morphology-related gene regulation by Ssn6; Spider biofilm induced, flow model biofilm repressed	-1.18068	0.84697	0.0401
orf19.3874	0	Predicted cation transmembrane transporter; Spider biofilm induced	-1.18068	0.84697	0.20938
orf19.2722	CGR1	Negative regulator of yeast-form growth; HSP70 family member; induced by growth cessation at yeast-hyphal transition or in planktonic growth; physically interacts with Msi3p; similar to rat anti-aging gene, SMP30, stationary phase enriched	-1.18025	0.84728	0.55494
orf19.3732	ERG25	Putative C-4 methyl sterol oxidase; C4-demethylation of ergosterol biosynthesis intermediates, based on similarity to S. cerevisiae Erg25; fluconazole-induced; induced in azole-resistant strain; rat catheter and Spider biofilm induced	-1.18023	0.84729	0.15445
orf19.5576	0	Putative pantothenate kinase; ortholog of S. cerevisiae Cab1; transposon mutation affects filamentous growth; repressed in core stress response	-1.17926	0.84799	0.04004
orf19.5428	0	Putative Golgi membrane protein with a predicted role in manganese homeostasis; Hap43p-repressed gene; clade-associated gene expression	-1.17925	0.848	0.24542
orf19.7654	CPR6	Putative peptidyl-prolyl cis-trans isomerase; macrophage/pseudohyphal-repressed; heavy metal (cadmium) stress-induced; heterozygous null mutant displays sensitivity to virgineone; rat catheter biofilm induced	-1.17913	0.84808	0.47691
orf19.1802	OFD1	Putative prolyl hydroxylase family member; regulates Ume6p stability in response to oxygen; inhibited by hypoxia; repressed by prostaglandins; Spider biofilm induced	-1.17869	0.8484	0.01845
orf19.5491.1	ATP14	Putative mitochondrial F1F0 ATP synthase subunit; macrophage/pseudohyphal-induced	-1.17819	0.84876	0.10723
orf19.500	0	Ortholog(s) have tRNA (adenine-N1-)-methyltransferase activity, role in tRNA methylation and nucleus, tRNA (m1A) methyltransferase complex localization	-1.17811	0.84882	0.12324
orf19.1420	0	Ortholog(s) have protein binding, bridging activity, role in vesicle-mediated transport and cytosol, nucleus localization	-1.17805	0.84886	0.39099
orf19.3123	RPT5	26S proteasome regulatory subunit; transcript regulated by Nrg1 and Mig1; regulated by Gcn2 and Gcn4; protein level decreases in stationary phase	-1.17783	0.84902	0.23041
orf19.3156	0	Protein of unknown function; induced by Mnl1 under weak acid stress	-1.17783	0.84902	0.2105
orf19.1927	SNM1	Protein similar to RNase MRP RNA binding protein; ciclopirox olamine induced; regulated by Sef1, Sfu1, and Hap43; Spider biofilm induced	-1.17779	0.84905	0.56961
orf19.4540	UBC8	Predicted ubiquitin-conjugating enzyme that negatively regulates gluconeogenesis by mediating the glucose-induced ubiquitination of fructose-1,6-bisphosphatase; induced by alpha pheromone in SpiderM medium	-1.17764	0.84916	0.02835
orf19.5093	0	Ortholog(s) have DNA translocase activity	-1.17758	0.8492	0.05385
orf19.178	0	Ortholog of C. dubliniensis CD36 : Cd36_32460, C. parapsilosis CDC317 : CPAR2_205480, Candida tenuis NRRL Y-1498 : CANTEDRAFT_115156 and Debaryomyces hansenii CBS767 : DEHA2E22154g	-1.1774	0.84933	0.25028
orf19.6049	0	Ortholog(s) have protein kinase activator activity, role in protein phosphorylation, regulation of cytokinesis and chromosome passenger complex, kinetochore microtubule, spindle midzone localization	-1.17724	0.84944	0.64966
orf19.2510	0	Ortholog(s) have role in protein folding, tubulin complex assembly	-1.17723	0.84945	0.05389
orf19.2914	0	Ortholog of C. dubliniensis CD36 : Cd36_45760, C. parapsilosis CDC317 : CPAR2_401920, Candida tenuis NRRL Y-1498 : CANTEDRAFT_126814 and Debaryomyces hansenii CBS767 : DEHA2D16742g	-1.17723	0.84945	0.06396
orf19.2508	PRM9	Protein described a similar to S. cerevisiae Prm9; not the ortholog though; mutant is viable	-1.17722	0.84946	0.22655
orf19.2417	SMC5	Protein similar to S. cerevisiae Smc5p, which is involved in DNA repair; transposon mutation affects filamentous growth	-1.17714	0.84952	0.68828
orf19.3983	0	Protein with a predicted transcription factor BTF3 domain; flow model biofilm induced	-1.17697	0.84964	0.32457
orf19.2168	0	Putative sterol deacetylase; flow model biofilm induced; rat catheter biofilm repressed	-1.17696	0.84964	0.04949
orf19.5639	HIS4	Multifunctional enzyme that catalyzes three steps of histidine biosynthesis, with phosphoribosyl-AMP cyclohydrolase, phosphoribosyl-ATP diphosphatase, and histidinol dehydrogenase activities; required for wild-type adhesion to human calls	-1.17628	0.85014	0.38865
orf19.5747	0	Ortholog(s) have structural constituent of ribosome activity and mitochondrial small ribosomal subunit localization	-1.1761	0.85027	0.23912
orf19.135	EXO84	Predicted subunit of the exocyst complex, involved in exocytosis; localizes to a crescent on the surface of the hyphal tip	-1.17598	0.85036	0.08474
orf19.3794	CSR1	Transcription factor; role in zinc homeostasis and regulation of Spider biofilm matrix; mutation affects filamentous growth; can suppress S. cerevisiae rok1 mutant inviability; Spider biofilm induced; mutants for abnormal Spider biofilms	-1.17587	0.85043	0.13267
orf19.3886	0	Ortholog of C. dubliniensis CD36 : Cd36_31820, C. parapsilosis CDC317 : CPAR2_205050, Debaryomyces hansenii CBS767 : DEHA2G10736g and Pichia stipitis Pignal : PICST_32993	-1.17586	0.85044	0.15194
orf19.2622	YPT31	Protein required for resistance to toxic ergosterol analog	-1.17578	0.8505	0.11066
orf19.5964	ARF2	Putative ADP-ribosylation factor; mutation confers hypersensitivity to Brefeldin A; Spider biofilm repressed	-1.17573	0.85054	0.02839
orf19.244	DCG1	Protein of unknown function; ortholog of S. cerevisiae Dcg1; transcript regulated by Nrg1 and Mig1	-1.17538	0.85079	0.80842
orf19.2847	0	Ortholog(s) have RNA polymerase III activity, role in tRNA transcription from RNA polymerase III promoter and DNA-directed RNA polymerase III complex, mitotic spindle pole body localization	-1.17536	0.85081	0.03983
orf19.1478	STT3	Putative oligosaccharyltransferase complex component; flow model and rat catheter biofilm repressed	-1.17495	0.8511	0.24897
orf19.5842	0	Protein with predicted siroheme synthase middle domains NAD(P)-binding; Hap43-repressed gene	-1.17495	0.8511	0.05827
orf19.2611	MCM6	Putative MCM DNA replication initiation complex component; mRNA expression peak at cell-cycle M/G1 phase; regulated by tyrosol and cell density; repressed by alpha pheromone in SpiderM medium; Hap43-induced gene	-1.17494	0.85111	0.15587
orf19.7605	PUP1	Putative beta 2 subunit of the 20S proteasome; macrophage/pseudohyphal-repressed; Spider biofilm repressed	-1.17478	0.85122	0.14019
orf19.2446	0	Ortholog(s) have cell division site, cell tip, cytoplasm, nucleus localization	-1.17469	0.85129	0.07556
orf19.5001	CUP2	Putative copper-binding transcription factor; required for normal resistance to copper; activates transcription of metallothionein genes; Hap43-repressed; Spider biofilm induced	-1.17469	0.85129	0.08663
orf19.5496	AVT1	Putative vacuolar transporter; promoter bound by a1p and alpha2p by ChIP-chip analysis	-1.17444	0.85147	0.06326
orf19.2352	0	Ortholog(s) have mitochondrion localization	-1.17416	0.85167	0.82617
orf19.3453	0	Ortholog(s) have cellular bud tip, cytoplasm localization	-1.17413	0.85169	0.212
orf19.4467	0	Ortholog of C. dubliniensis CD36 : Cd36_03660, C. parapsilosis CDC317 : CPAR2_106860, Candida tenuis NRRL Y-1498 : CANTEDRAFT_96694 and Debaryomyces hansenii CBS767 : DEHA2G15950g	-1.17411	0.85171	0.60537
orf19.6782	BMT1	Beta-mannosyltransferase, required for addition of the 1st beta-mannose residue to acid-stable fraction of cell wall phosphopeptidomannan; 9-gene family member; mutants induce higher levels of inflammatory cytokines in mouse dendritic cells	-1.17372	0.85199	0.10229
orf19.4199	SLY41	Protein involved in ER-to-Golgi transport; rat catheter and Spider biofilm induced	-1.17328	0.85231	0.1473
orf19.4939	MON2	Peripheral membrane protein; role in endocytosis and vacuole integrity; flow model and rat catheter biofilm repressed	-1.17327	0.85232	0.58573
orf19.5046	RAM1	Protein that acts in prenylation; transcription is alpha-factor induced; regulated in response to lovastatin and fluconazole; Hap43p-repressed gene	-1.17316	0.8524	0.56495
orf19.7412	MUB1	Predicted protein required for ubiquitination; role in meiosis, regulation of cell budding in S. cereviae; Spider biofilm induced	-1.17312	0.85243	0.33623
orf19.7612	CTM1	Putative cytochrome c lysine methyltransferase; regulated by Gcn2 and Gcn4; transcript induced by Mnl1 under weak acid stress; early-stage flow model biofilm induced	-1.17309	0.85245	0.03422
orf19.5295	0	Protein with a predicted endonuclease/exonuclease/phosphatase family domain and a carbon catabolite repressor protein 4 domain; induced by alpha pheromone in SpiderM medium	-1.17303	0.85249	0.62583
orf19.109	0	Probable mitochondrial tyrosyl-tRNA synthetase, based on conservation in other fungi	-1.17275	0.85269	0.0194
orf19.338	0	Putative glycoside hydrolase; stationary phase enriched protein; Hog1p-downregulated; shows colony morphology-related gene regulation by Ssn6p	-1.17225	0.85306	0.27325
orf19.5599	MDL2	Putative mitochondrial, half-size MDR-subfamily ABC transporter	-1.17203	0.85322	0.07426
orf19.5566	0	Ortholog(s) have role in protein lipoylation and mitochondrion localization	-1.17188	0.85333	0.00681
orf19.1418	SEC15	Predicted exocyst subunit; cellular bud tip-associated protein; ortholog of S. cerevisiae SEC15	-1.17168	0.85348	0.00064
orf19.5550	MRT4	Putative mRNA turnover protein; Hap43-induced; mutation confers hypersensitivity to tubercidin (7-deazaadenosine); rat catheter biofilm induced	-1.17164	0.8535	0.0791
orf19.6203	PUT3	Zn(II)2Cys6 transcription factor; has similarity to S. cerevisiae Put3, a transcription factor involved in the regulation of proline utilization genes	-1.17152	0.85359	0.52274
orf19.6568	SMC6	Putative structural maintenance of chromosomes (SMC) protein; Hap43-induced; cell-cycle regulated periodic mRNA expression; S. cerevisiae ortholog not cell-cycle regulated; Spider biofilm induced	-1.17149	0.85361	0.20818
orf19.4600.1	DPM3	Dolichol-phosphate mannose synthase subunit, essential for enzyme activity; flow model biofilm repressed	-1.17128	0.85377	0.03583
orf19.5201	0	Ortholog(s) have structural constituent of ribosome activity and mitochondrial small ribosomal subunit localization	-1.17108	0.85391	0.35728
orf19.6624	0	Ortholog(s) have GTPase activator activity and clathrin-coated vesicle, endosome, trans-Golgi network localization	-1.17091	0.85404	0.12754
orf19.3667	0	Ortholog(s) have microtubule motor activity, protein homodimerization activity and kinesin complex localization	-1.17083	0.85409	0.51392
orf19.6460	PEX1	Ortholog(s) have ATPase activity, protein heterodimerization activity, role in fatty acid metabolic process, protein import into peroxisome matrix, receptor recycling and peroxisomal membrane localization	-1.17082	0.8541	0.7709
orf19.2608	ADH5	Putative alcohol dehydrogenase; regulated by white-opaque switch; fluconazole-induced; antigenic in murine infection; regulated by Nrg1, Tup1; Hap43, macrophage repressed, flow model biofilm induced; Spider biofilm induced	-1.1708	0.85412	0.32347
orf19.944	IFG3	Putative D-amino acid oxidase; Spider biofilm induced	-1.17056	0.85429	0.12336
orf19.5161	0	Ortholog(s) have structural constituent of ribosome activity and mitochondrial large ribosomal subunit localization	-1.17054	0.8543	0.2029
orf19.5971	0	Ortholog of S. cerevisiae : MTC6, C. glabrata CBS138 : CAGL0I01892g, C. dubliniensis CD36 : Cd36_84990, C. parapsilosis CDC317 : CPAR2_405620 and Candida tenuis NRRL Y-1498 : CANTEDRAFT_99433	-1.17046	0.85437	0.33694
orf19.2601	HEM1	Putative 5-aminolevulinate synthase; caspofungin repressed; induced by high iron, nitric oxide; regulated by Ssn6; Hap43-repressed; Spider biofilm induced	-1.17038	0.85442	0.1421
orf19.107	0	DEAH-box ATP-dependent RNA helicase, required for 18S rRNA synthesis; rat catheter biofilm induced	-1.17006	0.85465	0.27717
orf19.1091	NOP8	Ortholog of S. cereviiae Nop8; has a role in ribosomal large subunit biogenesis; rat catheter and Spider biofilm induced	-1.16997	0.85472	0.09525
orf19.5213	0	Putative protein of unknown function; transcript is upregulated in clinical isolates from HIV+ patients with oral candidiasis	-1.16975	0.85489	0.77573
orf19.1429	SOH1	Subunit of the RNA polymerase II mediator complex; involved in control of cytokinesis, morphogenesis, biofilm formation, virulence; cell-cycle regulated periodic mRNA expression	-1.16973	0.85489	0.03394
orf19.5378	SCL1	Proteasome subunit YC7alpha; protein present in exponential and stationary growth phase yeast cultures; flow model and Spider biofilm repressed	-1.16964	0.85496	0.56048
orf19.3187	ZNC1	Zn(2)-Cys(6) transcription factor; regulated by Gcn2 and Gcn4; gene located in zinc cluster region of Chromosome 5, near the MTL locus; required for yeast cell adherence to silicone substrate; Spider biofilm induced	-1.16955	0.85503	0.0678
orf19.2503	0	Ortholog(s) have prospore membrane localization	-1.16924	0.85525	0.60949
orf19.3931	SFC1	Putative succinate-fumarate transporter; involved in repression of growth on sorbose; alkaline induced; rat catheter biofilm induced; Spider biofilm induced	-1.16916	0.85532	0.12169
orf19.6152	0	Ortholog of C. dubliniensis CD36 : Cd36_32830, C. parapsilosis CDC317 : CPAR2_205930, Candida tenuis NRRL Y-1498 : CANTEDRAFT_115846 and Debaryomyces hansenii CBS767 : DEHA2E06072g	-1.16889	0.85551	0.58745
orf19.4602	MDH1-1	Predicted malate dehydrogenase precursor; macrophage-induced transcript; protein present in exponential and stationary growth phase yeast cultures; Spider biofilm repressed	-1.16869	0.85566	0.07967
orf19.832	GPI13	Major facilitator superfamily protein; has phosphodiesterase/nucleotide pyrophosphatase domain; similar to S. cerevisiae Gpi13p, which acts in GPI anchor biosynthesis; Hap43p-induced gene	-1.16836	0.8559	0.39564
orf19.7589	0	Protein of unknown function; Hap43-repressed gene; transcript induced by elevated CO2	-1.16801	0.85615	0.4701
orf19.4577	0	Ortholog(s) have GTPase activating protein binding, cAMP-dependent protein kinase inhibitor activity, signal transducer activity	-1.16787	0.85626	0.44053
orf19.4322	DAP2	Putative dipeptidyl aminopeptidase; transcriptionally regulated during macrophage response	-1.16784	0.85628	0.10064
orf19.1832	FCY23	Putative transporter; Gcn4p-regulated; more similar to S. cerevisiae Tpn1p, which is a vitamin B6 transporter, than to purine-cytosine permeases	-1.16778	0.85633	0.68092
orf19.1528	0	Putative mitochondrial RNA polymerase specificity factor; possibly an essential gene, disruptants not obtained by UAU1 method	-1.16772	0.85637	0.25307
orf19.2892	0	Ortholog of C. dubliniensis CD36 : Cd36_45910, C. parapsilosis CDC317 : CPAR2_501110, Candida tenuis NRRL Y-1498 : CANTEDRAFT_119393 and Debaryomyces hansenii CBS767 : DEHA2E08976g	-1.16751	0.85652	0.08171
orf19.1276	0	Protein with a selenoprotein domain and a thioredoxin-like fold domain; similar to S. cerevisiae Vhs3p, which is a putative phosphopantothenoylcysteine decarboxylase	-1.16742	0.85659	0.15436
orf19.124	CIC1	Putative proteasome-interacting protein; rat catheter biofilm induced	-1.16737	0.85663	0.02761
orf19.3301	0	Putative ubiquitin ligase complex component; induced by heavy metal (cadmium) stress; Hog1-induced; transcript induced by Mnl1p under weak acid stress; flow model biofilm induced; Spider biofilm induced	-1.16735	0.85664	0.01506
orf19.6511	LIG1	tRNA ligase; functional homolog of S. cerevisiae Trl1	-1.16729	0.85669	0.00562
orf19.7561	DEF1	RNA polymerase II regulator; role in filamentation, epithelial cell escape, dissemination in RHE model; induced by fluconazole, high cell density; Efg1/hyphal regulated; role in adhesion, hyphal growth on solid media; Spider biofilm induced	-1.16729	0.85669	0.18029
orf19.1280	SUI1	Putative translation initiation factor; flucytosine induced; genes encoding ribosomal subunits, translation factors, and tRNA synthetases are downregulated upon phagocytosis by murine macrophage	-1.16712	0.85681	0.02504
orf19.2473	0	Putative RSC chromatin remodeling complex component; decreased transcription is observed upon fluphenazine treatment or in an azole-resistant strain that overexpresses CDR1 and CDR2	-1.16711	0.85682	0.22763
orf19.2447	0	Putative Type II phosphatidylinositol 4-kinase; Ssr1-repressed; flow model biofilm repressed	-1.16698	0.85692	0.10941
orf19.4821	LIP1	Secreted lipase, member of a lipase gene family whose members are expressed differentially in response to carbon source and during infection; may have a role in nutrition and/or in creating an acidic microenvironment	-1.16692	0.85696	0.79602
orf19.6458.1	0	Ortholog(s) have U6 snRNA binding activity and role in cytoplasmic mRNA processing body assembly, mRNA splicing, via spliceosome	-1.16689	0.85698	0.02008
orf19.4497	MED8	Ortholog(s) have RNA polymerase II core promoter proximal region sequence-specific DNA binding, RNA polymerase II transcription corepressor activity, TBP-class protein binding, structural molecule activity	-1.16671	0.85711	0.37041
orf19.6801	RPD31	Putative histone deacetylase; involved in regulation of white-opaque switch; Spider biofilm repressed	-1.16655	0.85723	0.30043
orf19.3884	FGR50	Protein lacking an ortholog in S. cerevisiae; transposon mutation affects filamentous growth; Spider biofilm repressed	-1.16649	0.85728	0.32249
orf19.880	0	Ortholog(s) have role in cargo loading into COPII-coated vesicle and COPII vesicle coat, cytosol, mating projection tip localization	-1.16628	0.85743	0.25888
orf19.3871	DAD3	Subunit of the Dam1 (DASH) complex, which acts in chromosome segregation by coupling kinetochores to spindle microtubules	-1.16624	0.85746	0.042
orf19.6923	0	Ortholog(s) have chromatin binding activity, role in RNA polymerase II transcriptional preinitiation complex assembly and transcription factor TFIID complex localization	-1.16604	0.85761	0.57575
orf19.7578	0	Ortholog(s) have oligosaccharide binding activity and role in ER-associated ubiquitin-dependent protein catabolic process, endoplasmic reticulum unfolded protein response, retrograde protein transport, ER to cytosol	-1.16598	0.85765	0.44743
orf19.6601	0	Protein of unknown function; rat catheter and flow model biofilm induced	-1.16579	0.85779	0.51304
orf19.2488	FAL1	eIF4A subfamily of DEAD-box ATP-dependent RNA helicases; predicted nucleolar protein required for maturation of 18S rRNA; Spider biofilm induced	-1.16569	0.85786	0.14777
orf19.6239	0	Putative serine/threonine protein kinase; possibly an essential gene, disruptants not obtained by UAU1 method	-1.16544	0.85804	0.35629
orf19.10	ALK8	Alkane-inducible cytochrome P450; catalyzes hydroxylation of lauric acid to hydroxylauric acid; overproduction causes fluconazole resistance in WT and causes multidrug resistance in a cdr1 cdr2 double mutant; rat catheter biofilm repressed	-1.16534	0.85812	0.18812
orf19.5106	DIP2	Putative small ribonucleoprotein complex; Tn mutation affects filamentous growth; physically interacts with TAP-tagged Nop1; heterozygous null mutant exhibits resistance to parnafungin; Hap43-induced gene; Spider biofilm induced	-1.16511	0.85828	0.19963
orf19.3394	0	Predicted membrane protein; induced by alpha pheromone in SpiderM medium	-1.16507	0.85832	0.09386
orf19.6008	0	S. cerevisiae ortholog YLL032C interacts with ribosomes; repressed by alpha pheromone in SpiderM medium	-1.16499	0.85838	0.21916
orf19.6211	0	Protein of unknown function; protein newly produced during adaptation to the serum	-1.16451	0.85873	0.34134
orf19.899	0	Ortholog of C. dubliniensis CD36 : Cd36_18040, C. parapsilosis CDC317 : CPAR2_211790, Candida tenuis NRRL Y-1498 : CANTEDRAFT_109928 and Debaryomyces hansenii CBS767 : DEHA2E21010g	-1.16369	0.85934	0.27158
orf19.7624	0	Ortholog(s) have role in maturation of SSU-rRNA from tricistronic rRNA transcript (SSU-rRNA, 5.8S rRNA, LSU-rRNA) and 90S preribosome, nucleolus, small-subunit processome localization	-1.16356	0.85943	0.291
orf19.413.1	RPS27A	Ribosomal protein S27; rat catheter and Spider biofilm induced	-1.16353	0.85946	0.13726
orf19.5834	0	Ortholog(s) have protein transporter activity, role in mRNA export from nucleus and cytoplasm, nucleus localization	-1.16349	0.85948	0.13151
orf19.3469	0	S. cerevisiae ortholog Stb1 has a role in regulation of MBF-specific transcription at Start; induced in a cyr1 null mutant; Spider biofilm induced	-1.16337	0.85957	0.07724
orf19.6529	CDC34	Putative ubiquitin-protein ligase; transcript regulated by Nrg1 and Tup1, and by Gcn2 and Gcn4; rat catheter biofilm induced	-1.16315	0.85974	0.39928
orf19.1514	0	Ortholog(s) have enzyme binding, phosphatidylinositol-4-phosphate binding activity	-1.16258	0.86016	0.61484
orf19.3785	0	DnaJ chaperone domain protein; role in pre-mRNA splicing; Spider biofilm induced	-1.16249	0.86022	0.65598
orf19.758	0	Ortholog(s) have signal sequence binding activity, role in vacuolar transport and late endosome localization	-1.1624	0.86029	0.015
orf19.4275	RAD9	DNA damage-dependent checkpoint protein; involved in regulation of DNA-damage-induced filamentous growth; induced by alpha pheromone in SpiderM medium	-1.16233	0.86034	0.20378
orf19.3348	0	Ortholog(s) have structural constituent of ribosome activity and fungal-type vacuole, mitochondrial large ribosomal subunit localization	-1.16225	0.8604	0.1525
orf19.6577	FLU1	Multidrug efflux pump of the plasma membrane; MDR family member of the MFS (major facilitator superfamily) of transporters; involved in histatin 5 efflux; fungal-specific (no human/murine homolog)	-1.16221	0.86043	0.20776
orf19.59	REI1	Putative cytoplasmic pre-60S factor; Hap43-induced; repressed by prostaglandins	-1.16205	0.86055	0.08015
orf19.2485	0	Ortholog(s) have structural constituent of nuclear pore activity and role in chromosome segregation, heterochromatin assembly involved in chromatin silencing, nuclear pore complex assembly, protein targeting to nuclear inner membrane	-1.16186	0.86069	0.03839
orf19.1712	GEA2	Putative ARF GTP/GDP exchange factor; induced in low iron; flow model biofilm repressed	-1.1617	0.86081	0.19682
orf19.7020	0	Protein similar to S. cerevisiae Kex1p, which is a pheromone-processing peptidase; possible Kex2p substrate	-1.16168	0.86082	0.05122
orf19.4517	0	Protein of unknown function; Hap43-induced gene	-1.16139	0.86103	0.1289
orf19.2219	ORF298	Predicted ORF in retrotransposon Tca3; similar to Gag-Pol; a-specific transcript, alpha-factor induced; rat catheter biofilm repressed; mRNA binds She3	-1.16116	0.86121	0.04452
orf19.4246	0	Protein with similarity to S. cerevisiae Ykr070w; Tn mutation affects filamentation; Hog1-repressed; colony morphology-related gene regulation by Ssn6p; induced during cell wall regeneration; possibly essential	-1.16065	0.86158	0.4759
orf19.4720	CTR2	Putative low-affinity copper transporter of the vacuolar membrane; induced by nitric oxide; clade-associated gene expression; rat catheter and flow model biofilm induced	-1.16047	0.86172	0.15231
orf19.1569	UTP22	Putative U3 snoRNP protein; Ssr1-induced; repressed by prostaglandins; heterozygous null mutant is resistant to parnafungin	-1.16026	0.86188	0.13651
orf19.3251	ARC19	Putative ARP2/3 complex subunit; Hap43-induced gene; mutation confers hypersensitivity to cytochalasin D; rat catheter biofilm repressed	-1.16024	0.86189	0.63258
orf19.2988	0	Predicted aminotransferase based on S. pombe ortholog SPBC660.12c; flow model biofilm induced	-1.16022	0.8619	0.62897
orf19.3774	PPG1	Protein phosphatase of the Type 2A-related family (serine/threonine-specific) involved in control of filamentous growth and virulence	-1.16021	0.86191	0.04453
orf19.779	HAT1	Hat1-Hat2 histone acetyltransferase complex subunit; involved in DNA damage repair and morphogenesis; mutations cause constitutive pseudohyphal growth, white to opaque switch, caspofungin sensitivity; rat catheter, Spider biofilm repressed	-1.16019	0.86192	0.43409
orf19.5673	OPT7	Putative oligopeptide transporter; possibly transports GSH or related compounds; Hog1-induced; expression of OPT6, -7, or -8 does not suppress defect of mutant lacking OPT1-3; Hap43-repressed; F-12/CO2 early biofilm induced	-1.16017	0.86195	0.16235
orf19.1287	0	Protein of unknown function; flow model biofilm induced; Spider biofilm induced	-1.1595	0.86244	0.14573
orf19.6850	0	Putative transcription factor with C3HC4 zinc finger DNA-binding motif; mutants are viable	-1.15949	0.86245	0.11125
orf19.3914	0	Has domain(s) with predicted translation initiation factor activity, role in translational initiation and cytoplasm localization	-1.15945	0.86248	0.05485
orf19.1300	0	Putative mitochondrial membrane protein; homozygous transposon insertion causes decreased colony wrinkling under filamentous growth-inducing conditions, but does not block true hyphal formation in liquid media	-1.15931	0.86258	0.48861
orf19.3192	STI1	Protein that interacts with Cdc37 and Crk1 in two-hybrid; may be involved in Cdc37 chaperone activity; soluble protein in hyphae; protein in exponential and stationary phase yeast cultures; YNB biofilm induced; Spider biofilm induced	-1.15927	0.86261	0.61618
orf19.769	IFE1	Putative medium-chain alcohol dehydrogenase; rat catheter and Spider biofilm repressed	-1.15926	0.86262	0.13392
orf19.2320	0	Putative serine/threonine-protein kinase; possibly an essential gene, disruptants not obtained by UAU1 method	-1.15916	0.86269	0.03841
orf19.1210	0	Ortholog(s) have L-arginine transmembrane transporter activity, L-aspartate transmembrane transporter activity and L-glutamate transmembrane transporter activity, more	-1.1591	0.86274	0.44145
orf19.5231.2	ATP19	Subunit k of the mitochondrial F1F0 ATP synthase; a large enzyme complex required for ATP synthesis; Spider biofilm repressed	-1.15899	0.86282	0.68932
orf19.1654	0	Predicted membrane protein; induced by prostaglandins	-1.15892	0.86287	0.18183
orf19.6411	0	Protein similar to S. cerevisiae Vac14p; a protein involved in regulated synthesis of PtdIns(3,5)P(2); transposon mutation affects filamentous growth	-1.15884	0.86293	0.40501
orf19.238	CCP1	Cytochrome-c peroxidase N terminus; Rim101, alkaline pH repressed; induced in low iron or by macrophage interaction; oxygen-induced activity; regulated by Sef1, Sfu1, and Hap43; Spider biofilm induced; rat catheter biofilm repressed	-1.15855	0.86315	0.6232
orf19.2383	YKU80	Yku70p-Yku80p Ku complex subunit involved in nonhomologous end joining during double-strand break repair repair; Hap43-repressed gene; flow model biofilm induced	-1.15838	0.86327	0.59067
orf19.3610	0	Protein of unknown function; upregulation correlates with clinical development of fluconazole resistance; regulated by Sef1, Sfu1, and Hap43	-1.15834	0.86331	0.17863
orf19.921	HMS1	hLh domain Myc-type transcript factor; required for morphogenesis induced by elevated temperature or Hsp90 compromise; acts downstream of Pcl1; Spider biofilm induced	-1.15825	0.86337	0.13143
orf19.7080	LEU2	Isopropyl malate dehydrogenase; leucine biosynthesis; induced by human whole blood or PMNs; protein level decreases in stationary phase; GlcNAc-induced protein; flow model biofilm repressed	-1.1582	0.86341	0.23708
orf19.6264.3	0	Ortholog(s) have role in ER to Golgi vesicle-mediated transport and ER to Golgi transport vesicle, Golgi apparatus, endoplasmic reticulum localization	-1.158	0.86356	0.52122
orf19.24	RTA2	Flippase involved in sphingolipid long chain base release; mediates calcineurin-dependent ER stress response and resistance to azoles; Plc1p, Ca2+, calcineurin-regulated;	-1.15795	0.86359	0.12017
orf19.4353	ULP2	SUMO deconjugation enzyme; removes the small ubiquitin-like modifier (SUMO) from proteins; Spider biofilm induced	-1.15785	0.86367	0.54406
orf19.4115	0	Ortholog of Candida albicans WO-1 : CAWG_04349	-1.15778	0.86372	0.13671
orf19.6557	0	Protein with a predicted fatty acid amide hydrolase I domain; induced by Mnl1 under weak acid stress	-1.1573	0.86408	0.32036
orf19.6146	CLG1	Putative cyclin-like protein; transcription is regulated upon yeast-hyphal switch	-1.15726	0.86411	0.06775
orf19.844	STE11	Protein similar to S. cerevisiae Ste11p; mutants are sensitive to growth on H2O2 medium	-1.15688	0.86439	0.14036
orf19.6805	0	Protein of unknown function; Spider biofilm induced	-1.15678	0.86447	0.0268
orf19.4595	0	Ortholog of C. dubliniensis CD36 : Cd36_41860, C. parapsilosis CDC317 : CPAR2_400440, Candida tenuis NRRL Y-1498 : CANTEDRAFT_103033 and Debaryomyces hansenii CBS767 : DEHA2B03234g	-1.15641	0.86475	0.68097
orf19.871	0	Ortholog(s) have GTPase activator activity, role in positive regulation of GTPase activity, positive regulation of TORC1 signaling and Lst4-Lst7 complex, vacuolar membrane localization	-1.15641	0.86475	0.33927
orf19.2820	0	Ortholog(s) have nucleocytoplasmic transporter activity, structural constituent of nuclear pore activity and role in NLS-bearing protein import into nucleus, nuclear pore organization, protein targeting to nuclear inner membrane	-1.15623	0.86488	0.11095
orf19.1658	0	Ortholog(s) have cell cortex, cellular bud neck, cellular bud tip, mating projection tip localization	-1.15605	0.86501	0.80275
orf19.3367	0	Ortholog(s) have structural constituent of ribosome activity and mitochondrial large ribosomal subunit localization	-1.15572	0.86526	0.49434
orf19.1546	0	Membrane-localized protein of unknown function	-1.15503	0.86578	0.41268
orf19.4143	FYV5	Protein with a predicted role maturation of 18S rRNA; rat catheter biofilm induced	-1.15499	0.86581	0.02058
orf19.5975	TRY4	C2H2 transcription factor; fluconazole-repressed; induced in ssr1 mutant; required for yeast cell adherence to silicone substrate; Spider biofilm induced	-1.15472	0.86601	0.17934
orf19.5813	0	Putative adhesin-like protein; upregulated during growth in the mouse cecum; flow model, rat catheter and Spider biofilm induced	-1.15465	0.86606	0.2644
orf19.2341	HNT1	Protein with similarity to protein kinase C inhibitor-I; protein level decreases in stationary phase cultures	-1.1546	0.8661	0.63387
orf19.264	0	Has domain(s) with predicted protein kinase binding activity and role in regulation of cyclin-dependent protein serine/threonine kinase activity	-1.15449	0.86618	0.1901
orf19.7358	SAM50	Predicted component of the SAM complex involved in mitochondrial protein import	-1.15422	0.86639	0.23768
orf19.4600	0	Protein of unknown function; possible mitochondrial protein; Spider biofilm induced	-1.1542	0.8664	0.1647
orf19.2755	0	Ortholog(s) have role in proteasomal ubiquitin-independent protein catabolic process, proteasome-mediated ubiquitin-dependent protein catabolic process and cytosol, nucleus, proteasome core complex, beta-subunit complex localization	-1.15414	0.86644	0.13306
orf19.644	HGT9	Putative glucose transporter of the major facilitator superfamily; the C. albicans glucose transporter family comprises 20 members; 12 probable membrane-spanning segments; induced at low (0.2%, compared to 2%) glucose in rich media; intron	-1.1539	0.86662	0.09806
orf19.3859	0	Putative microsomal beta-keto-reductase; transcript upregulated by treatment with ciclopirox olamine; induced by alpha pheromone in SpiderM medium; regulated by Sef1, Sfu1, and Hap43	-1.15389	0.86664	0.52928
orf19.6729	TIP120	Protein similar to human CAND1 (Cullin-Associated Nedd8-Dissociated) protein involved in regulation of SCF complexes; binds unnedddylated cullin Cdc53; mutants are viable	-1.15379	0.86671	0.26763
orf19.5531	CDC37	Chaperone for Crk1p; interacts with Crk1p kinase domain and with Sti1p; putative phosphorylation site at Ser14; functional homolog of S. cerevisiae Cdc37p; likely to be essential for growth; regulated by Gcn2p and Gcn4p	-1.1535	0.86693	0.32895
orf19.4705	0	Ortholog(s) have tRNA adenylyltransferase activity, role in tRNA 3'-terminal CCA addition and mitochondrial matrix localization	-1.15341	0.867	0.33409
orf19.213	0	Ortholog(s) have role in proteasome-mediated ubiquitin-dependent protein catabolic process and CENP-A containing chromatin, nucleus, proteasome regulatory particle, lid subcomplex, proteasome storage granule localization	-1.15339	0.86701	0.34268
orf19.3736	KAR4	Transcription factor; required for gene regulation in response to pheromones; ortholog of S. cerevisiae Kar4; role in karyogamy; opaque-specific, a-specific; induced by alpha factor	-1.15334	0.86705	0.15558
orf19.5381	0	Ortholog(s) have mRNA binding activity	-1.15327	0.8671	0.37244
orf19.5818	SUR2	Putative ceramide hydroxylase; predicted enzyme of sphingolipid biosynthesis; regulated by Tsa1, Tsa1B under H2O2 stress conditions; Spider and flow model biofilm induced	-1.15294	0.86735	0.69487
orf19.6296	VPS22	ESCRT-II complex protein with a role in multivesicular body (MVB) trafficking; required for processing of Rim8p; Hap43p-repressed gene	-1.15291	0.86737	0.16765
orf19.761	TCO89	Putative homolog of S. cerevisiae Tco89p, which is a component of the TOR C1 complex that is involved in the regulation of growth and cell wall integrity; heterozygous null mutant displays sensitivity to rapamycin	-1.1528	0.86745	0.30797
orf19.7489	LRG1	Ortholog(s) have GTPase activator activity	-1.15278	0.86747	0.25504
orf19.920	RMT2	Minor protein arginine methyltransferases (PRMT) involved in methylation of arginine residues	-1.15263	0.86758	0.09048
orf19.7072	PEL1	Predicted enzyme of mitochondrial phospholipid biosynthesis; rat catheter and flow model biofilm induced	-1.1523	0.86783	0.07869
orf19.3266	0	Ortholog of C. dubliniensis CD36 : Cd36_25930, C. parapsilosis CDC317 : CPAR2_800910, Candida tenuis NRRL Y-1498 : CANTEDRAFT_132053 and Debaryomyces hansenii CBS767 : DEHA2E17160g	-1.15228	0.86784	0.00284
orf19.5009	0	Ortholog(s) have cytoplasm localization	-1.15209	0.86799	0.00062
orf19.863	0	Ortholog(s) have structural constituent of ribosome activity and mitochondrial large ribosomal subunit localization	-1.15161	0.86835	0.34582
orf19.7570	UGA3	Zn(II)2Cys6 transcription factor; required for utilization of gamma-aminobutyrate (GABA) as a nitrogen source; mutants display decreased CFU in mouse kidneys; Spider biofilm induced	-1.1516	0.86836	0.08239
orf19.6829	0	Protein with a predicted mitochondrial ATPase expression domain; possibly an essential gene, disruptants not obtained by UAU1 method	-1.15159	0.86836	0.03576
orf19.4112	0	Ortholog(s) have 8-oxo-dGDP phosphatase activity	-1.15159	0.86836	0.10385
orf19.7247	RIM101	Transcription factor; alkaline pH response; required for alkaline-induced hyphal growth; role in virulence in mice; activated by C-terminal proteolytic cleavage; mediates both positive and negative regulation; Spider biofilm induced	-1.15131	0.86857	0.35339
orf19.1204	0	Phosphorylated protein of unknown function; transcript is upregulated clinical isolates from HIV positive patients with oral candidiasis	-1.15126	0.86861	0.57352
orf19.793	CAK1	Monomeric CDK-activating kinase; functional homolog of S. cerevisiae Cak1p; phosphorylates cyclin-free human CDK2; lacks glycine loop motif; conserved lysine (K36) not required for activity; possibly essential gene (by UAU1 method)	-1.15125	0.86862	0.30311
orf19.4521	0	S. cerevisiae ortholog Env9 has similarity to oxidoreductases and is proposed to have vacuolar functions, found in lipid particles; hyphal-induced expression	-1.15124	0.86863	0.06917
orf19.5299	ECM1	Putative pre-ribosomal factor; decreased mRNA abundance observed in cyr1 homozygous mutant hyphae; induced by heavy metal (cadmium) stress; Hog1p regulated	-1.15097	0.86883	0.2301
orf19.801	TBF1	Essential transcription factor; induces ribosomal protein genes and the rDNA locus; acts with Cbf1 at subset of promoters; recruits Fhl1 and Ifh1 to promoters; role is analogous to that of S. cerevisiae Rap1; Spider biofilm induced	-1.15088	0.8689	0.15339
orf19.1575	PRS1	Phosphoribosylpyrophosphate synthetase; enzyme of purine, pyrimidine, histidine, and tryptophan biosynthesis; essential; flucytosine induced; macrophage/pseudohyphal-induced	-1.15081	0.86895	0.11647
orf19.5200	SIT4	Serine/threonine protein phosphatase catalytic subunit; has a role in cell wall maintenance, hyphal growth, and virulence in a mouse systemic infection model	-1.15078	0.86898	0.0189
orf19.499	0	Ortholog(s) have S-adenosylmethionine-dependent methyltransferase activity, role in translational readthrough and mitochondrion localization	-1.15071	0.86903	0.13446
orf19.1690	TOS1	Protein similar to alpha agglutinin anchor subunit; secreted; exogenously expressed protein is a substrate for Kex2 processing in vitro; fluconazole-induced; induced by alpha pheromone in SpiderM medium; Hap43-induced	-1.15037	0.86928	0.09789
orf19.4287	0	Putative oxidoreductase; Hap43-repressed gene; clade-associated gene expression	-1.15037	0.86929	0.42648
orf19.837.1	INO4	Transcription factor; activator that forms a heterodimer with Ino2; likely regulates genes involved in phosphatidylcholine and phosphatidylinositol biosynthesis, fatty acid beta-oxidation, and peroxisome biogenesis; gene has intron	-1.15026	0.86937	0.3243
orf19.3689	0	Putative protein similar to 6-phosphofructo-2-kinase/fructose-2,6-bisphosphatase; expression downregulated in an ssr1 null mutant	-1.15014	0.86946	0.11662
orf19.4786	FGR43	Protein lacking an S. cerevisiae ortholog; transposon mutation affects filamentous growth; induced by by Mnl1 under weak acid stress	-1.15007	0.86951	0.54978
orf19.3582	0	Ortholog(s) have protein-lysine N-methyltransferase activity, role in peptidyl-lysine dimethylation, peptidyl-lysine monomethylation, vesicle-mediated transport and cytosol, nucleus localization	-1.14987	0.86967	0.94923
orf19.2795	LHP1	Ortholog(s) have tRNA binding activity, role in tRNA 3'-trailer cleavage, endonucleolytic and nucleolus, nucleoplasm localization	-1.14986	0.86967	0.12098
orf19.351	0	Ortholog of S. cerevisiae : YPR153W, C. glabrata CBS138 : CAGL0L08382g, C. dubliniensis CD36 : Cd36_83540, C. parapsilosis CDC317 : CPAR2_404520 and Candida tenuis NRRL Y-1498 : CANTEDRAFT_115795	-1.14982	0.8697	0.11593
orf19.2723	HIT1	Ortholog of S. cerevisiae Hit1; protein of unknown function required for high temperature growth; flow model biofilm induced; Spider biofilm induced	-1.14977	0.86974	0.04522
orf19.4936.1	0	Putative adhesin-like protein; Spider biofilm induced	-1.14975	0.86976	0.83426
orf19.5559	RAV2	Protein similar to S. cerevisiae Rav2; a regulator of (H+)-ATPase in vacuolar membrane; transposon mutation affects filamentous growth	-1.14974	0.86976	0.09509
orf19.881	DFG16	Rim101 pathway protein that acts in Rim101 processing; regulates filamentation in response to alkaline pH; required for host tissue invasion during infection; flow model biofilm induced	-1.1495	0.86994	0.1119
orf19.7264	0	Metalloprotease subunit of the 19S regulatory particle of the 26S proteasome lid; couples the deubiquitination and degradation of proteasome substrates; role in fission of mitochondria and peroxisome; Spider biofilm repressed	-1.14933	0.87007	0.40765
orf19.2241	PST1	Putative 1,4-benzoquinone reductase; hyphal-induced; regulated by Cyr1, Ras1, Efg1, Nrg1, Rfg1, Tup1; Hap43-induced; Spider biofilm induced	-1.14921	0.87017	0.23219
orf19.3798	0	Ortholog(s) have tRNA (guanine-N7-)-methyltransferase activity, role in tRNA methylation and nucleolus, tRNA methyltransferase complex localization	-1.14893	0.87038	0.54296
orf19.6461	0	Ortholog(s) have unfolded protein binding activity, role in aerobic respiration, mitochondrial respiratory chain complex IV assembly, protein processing and mitochondrial inner membrane localization	-1.14893	0.87037	0.59532
orf19.2930	0	Predicted translation initiation factor; role in translational initiation; Spider biofilm repressed	-1.14851	0.87069	0.09347
orf19.1460	0	Putative glutamine-dependent NAD synthetase, involved in NAD salvage pathway	-1.14819	0.87094	0.4307
orf19.2472.1	0	Ortholog of C. dubliniensis CD36 : Cd36_61610, C. parapsilosis CDC317 : CPAR2_107530, Candida tenuis NRRL Y-1498 : CANTEDRAFT_115252 and Debaryomyces hansenii CBS767 : DEHA2D02200g	-1.14814	0.87098	0.04917
orf19.3243	SRP54	Putative signal recognition particle (SRP) subunit; induced in ssr1 null; Spider biofilm repressed	-1.14799	0.87108	0.57805
orf19.6749	KRS1	Putative tRNA-Lys synthetase; repressed upon phagocytosis by murine macrophages; stationary phase enriched protein; Spider biofilm repressed	-1.14721	0.87168	0.10094
orf19.3173	0	Ortholog(s) have Golgi apparatus, endoplasmic reticulum localization	-1.14718	0.87171	0.01311
orf19.7047	RTF1	Putative RNA polymerase II-associated Paf1 complex subunit; induced during the mating process	-1.14709	0.87177	0.11625
orf19.4550	0	Predicted MFS membrane transporter, member of the drug:proton antiporter (12 spanner) (DHA1) family; flow model biofilm induced	-1.14679	0.872	0.1654
orf19.2084	CDH1	Protein involved in regulation of mitosis; similar to S. cerevisiae Cdh1, which is an APC/C component; transcriptionally induced by Mnl1 under weak acid stress	-1.14643	0.87227	0.15019
orf19.6558	0	Ortholog(s) have GTPase activator activity and cytosol localization	-1.14621	0.87244	0.14622
orf19.5935	0	Ortholog of C. dubliniensis CD36 : Cd36_84710, C. parapsilosis CDC317 : CPAR2_807470, Candida tenuis NRRL Y-1498 : CANTEDRAFT_136475 and Debaryomyces hansenii CBS767 : DEHA2B08844g	-1.14591	0.87267	0.48157
orf19.854	UGA11	Putative gamma-aminobutyrate (GABA) transaminase; macrophage-induced; overlaps orf19.854.1, which is a region annotated as a blocked reading frame; Spider biofilm induced	-1.14586	0.87271	0.04361
orf19.5258	0	Protein of unknown function; induced by nitric oxide	-1.14585	0.87271	0.09085
orf19.5854	SBP1	Similar to RNA binding proteins; downregulated upon adherence to polystyrene; stationary-phase enriched protein	-1.14557	0.87293	0.0339
orf19.3287	BUD22	Protein with a predicted role in 18S rRNA maturation and small ribosomal subunit biogenesis; repressed in core stress response; repressed by prostaglandins	-1.14542	0.87304	0.14749
orf19.873.1	COX6	Putative cytochrome c oxidase; flucytosine induced	-1.14526	0.87316	0.13751
orf19.5041	0	Ortholog of C. dubliniensis CD36 : Cd36_43600, C. parapsilosis CDC317 : CPAR2_403780, Candida tenuis NRRL Y-1498 : CANTEDRAFT_93767 and Debaryomyces hansenii CBS767 : DEHA2G16984g	-1.1451	0.87328	0.35404
orf19.7068	MAC1	Copper fist transcription factor; regulator of CTR1 copper transporter; induces CTR1 in low-copper conditions; required for copper regulation of SOD1 and SOD3; Spider biofilm induced	-1.14501	0.87335	0.39558
orf19.1711	END3	Regulated by Gcn4p; induced in response to amino acid starvation (3-aminotriazole treatment)	-1.145	0.87336	0.30593
orf19.5269	0	Ortholog of C. dubliniensis CD36 : Cd36_11210, C. parapsilosis CDC317 : CPAR2_805180, Candida tenuis NRRL Y-1498 : CANTEDRAFT_116279 and Debaryomyces hansenii CBS767 : DEHA2B10714g	-1.14471	0.87358	0.50494
orf19.1107	0	Protein of unknown function; Spider biofilm induced	-1.1447	0.87359	0.17947
orf19.952	0	Has domain(s) with predicted DNA binding activity	-1.14456	0.8737	0.30915
orf19.1989	DCW1	Protein with predicted GPI modification; dfg5 dcw1 double mutant is inviable; not required for wild-type hyphal growth; upregulated in cyr1 mutant (yeast or hyphal form); Hap43-induced	-1.1445	0.87375	0.37343
orf19.2753	ZCF15	Predicted Zn(II)2Cys6 transcription factor of unknown function; rat catheter biofilm induced	-1.14443	0.8738	0.25173
orf19.7367	UBP1	Ortholog(s) have ubiquitin-specific protease activity, role in protein deubiquitination and endoplasmic reticulum localization	-1.14434	0.87387	0.15116
orf19.1534	0	Ortholog of S. cerevisiae Zrt3, vacuolar membrane zinc transporter; predicted Kex2 substrate; induced in oralpharyngeal candidasis; flow model biofilm induced; Spider biofilm induced	-1.14432	0.87388	0.05056
orf19.2996	0	Ortholog(s) have cytoplasm localization	-1.14411	0.87404	0.12475
orf19.6668	0	Ortholog(s) have ubiquitin binding, ubiquitin-protein transferase activator activity and role in ER-associated ubiquitin-dependent protein catabolic process, establishment of protein localization to endoplasmic reticulum membrane	-1.14411	0.87404	0.23411
orf19.1742	HEM3	Hydroxymethylbilane synthase; converts 4-porphobilinogen to hydroxymethylbilane in heme biosynthesis; induced in high iron, CO2; alkaline repressed; regulated by Sef1, Sfu1, and Hap43; rat catheter and Spider biofilm induced	-1.14405	0.87409	0.24158
orf19.1760	RAS1	RAS signal transduction GTPase; regulates cAMP and MAP kinase pathways; role in hyphal induction, virulence, apoptosis, heat-shock sensitivity; nonessential; plasma membrane-localized; complements viability of S. cerevisiae ras1 ras2 mutant	-1.14395	0.87416	0.00782
orf19.76	SPB1	Putative AdoMet-dependent methyltransferase; Hap43-induced; repressed by prostaglandins; possibly essential gene, disruptants not obtained by UAU1 method; Spider biofilm induced	-1.14392	0.87419	0.08335
orf19.6472	CYP1	Peptidyl-prolyl cis-trans isomerase; cyclosporin A sensitive activity; soluble in hyphae; biofilm induced, macrophage-induced protein; downregulated upon treatment of biofilm with farnesol; present in exponential and stationary phase cells	-1.14376	0.87431	0.65599
orf19.1793	0	Ortholog(s) have phosphatidylinositol-3,5-bisphosphate binding activity and role in macroautophagy, piecemeal microautophagy of nucleus	-1.14371	0.87435	0.31994
orf19.3605	PEX17	Putative peroxin	-1.14365	0.87439	0.83869
orf19.5253	0	Has domain(s) with predicted ATP binding, protein kinase activity, protein tyrosine kinase activity and role in protein phosphorylation	-1.14339	0.87459	0.14637
orf19.327	HTA3	Putative histone H2A; amphotericin B repressed; flucytosine induced; RNA abundance regulated by tyrosol and cell density; Spider biofilm repressed	-1.14336	0.87462	0.30339
orf19.6934	0	Ortholog(s) have role in protein insertion into mitochondrial membrane from inner side and integral component of mitochondrial inner membrane localization	-1.14314	0.87478	0.29178
orf19.714	0	Ortholog(s) have GTPase activity, role in intracellular protein transport, retrograde transport, endosome to Golgi and Golgi apparatus, cis-Golgi network, cytosol localization	-1.14312	0.8748	0.40222
orf19.4759	COX5	Cytochrome oxidase subunit V; putative upstream CCAAT box regulatory element; macrophage/pseudohyphal-induced; repressed by nitric oxide; intron in 5'-UTR; Hap43p-dependent repression in low iron medium	-1.14306	0.87484	0.0755
orf19.6766	NOP13	Ortholog of S. cerevisiae Nop13; a nucleolar protein found in preribosomal complexes; Hap43-induced gene; rat catheter biofilm induced	-1.14302	0.87487	0.07199
orf19.2210	0	Protein of unknown function; Spider biofilm induced	-1.14297	0.87491	0.19459
orf19.3730	0	Protein similar to S. cerevisiae Kre27p, which has a role in resistance to killer toxin; predicted Kex2p substrate	-1.1426	0.8752	0.05079
orf19.4062	TRY2	Transcription factor; regulator of yeast form adherence; required for yeast cell adherence to silicone substrate; Spider biofilm induced	-1.14224	0.87547	0.26449
orf19.7500	PXA1	Putative peroxisomal, half-size adrenoleukodystrophy protein (ALD or ALDp) subfamily ABC family transporter	-1.142	0.87566	0.13123
orf19.2939	0	Ortholog(s) have role in mitochondrial respiratory chain complex IV assembly and mitochondrion localization	-1.14196	0.87569	0.0235
orf19.4609	0	Putative dienelactone hydrolase; protein abundance is affected by URA3 expression in the CAI-4 strain background; protein present in exponential and stationary growth phase yeast cultures; rat catheter biofilm repressed	-1.14183	0.87579	0.32031
orf19.4535	PTR3	Protein similar to S. cerevisiae Ptr3p, which is a sensor of external amino acids; expression upregulated in an ssr1 null mutant	-1.14161	0.87596	0.51809
orf19.3168	RPN8	Putative regulatory subunit of the 26S proteasome; mutation confers hypersensitivity to amphotericin B; regulated by Mig1, Gcn2 and Gcn4; Spider biofilm repressed	-1.14144	0.87609	0.24922
orf19.5504	0	Ortholog of C. dubliniensis CD36 : Cd36_73400, C. parapsilosis CDC317 : CPAR2_703180, Candida tenuis NRRL Y-1498 : CANTEDRAFT_104803 and Debaryomyces hansenii CBS767 : DEHA2A04466g	-1.14133	0.87617	0.46857
orf19.5087	BUD6	Protein required for Spitzenkorper formation in hyphal cells (wild-type localization of Mlc1p to the Spitzenkorper); localizes to polarisome	-1.14124	0.87624	0.20361
orf19.577	0	Predicted protein tyrosine phosphatase; rat catheter biofilm induced	-1.14118	0.87628	0.10256
orf19.7386	0	Ortholog(s) have ribosome binding activity	-1.14098	0.87644	0.02793
orf19.4940	0	Putative histidine permease; fungal-specific (no human or murine homolog); Hap43p-induced gene	-1.14098	0.87644	0.18437
orf19.3003.1	RPL6	Ortholog of S. cerevisiae ribosomal subunit, Rpl6B; transposon mutation affects filamentous growth; translation-related genes are downregulated upon phagocytosis by murine macrophage; Hap43-induced; Spider biofilm repressed	-1.1405	0.87681	0.23571
orf19.3317	MED22	RNA polymerase II mediator complex subunit	-1.14043	0.87686	0.06692
orf19.2487	0	Protein with a predicted phosphoribulokinase/uridine kinase domain; Spider biofilm induced	-1.14036	0.87692	0.73959
orf19.1291	ABZ1	Ortholog(s) have 4-amino-4-deoxychorismate synthase activity, role in para-aminobenzoic acid biosynthetic process and cytosol, nucleus localization	-1.14025	0.877	0.30389
orf19.5671	0	Ortholog(s) have enzyme inhibitor activity and role in actin cortical patch assembly, negative regulation of catalytic activity, septin cytoskeleton organization	-1.1401	0.87711	0.49526
orf19.2073	0	Protein with a multidrug and toxin extrusion protein domain; induced by Mnl1 under weak acid stress	-1.14006	0.87715	0.46172
orf19.4733	YMC2	Putative mitochondrial carrier protein; Gcn4-regulated; F-12/ CO2 early biofilm induced; Spider biofilm induced	-1.13997	0.87722	0.1797
orf19.4869	SFU1	GATA-type transcription factor; regulator of iron-responsive genes; represses iron utilization genes if iron is present; Hap43-repressed; promotes gastrointestinal commensalism in mice; Spider biofilm induced	-1.13957	0.87752	0.39445
orf19.5749	SBA1	Similar to co-chaperones; induced in high iron; farnesol-, heavy metal (cadmium) stress-induced; protein level decreases in stationary phase cultures; Hap43-repressed	-1.13939	0.87766	0.74201
orf19.3434	TRY5	Zn(II)2Cys6 transcription factor; regulator of yeast form adherence; required for yeast cell adherence to silicone substrate	-1.13934	0.8777	0.21038
orf19.6369	RIO2	Putative serine kinase with a predicted role in the processing of the 20S pre-rRNA into mature 18S rRNA; null mutants are hypersensitive to caspofungin	-1.13934	0.8777	0.06082
orf19.7335	PRE8	Putative alpha-2_sc subunit of proteasome; macrophage-induced protein; regulated by Gcn2p and Gcn4p; transcription is positively regulated by Tbf1p; stationary phase enriched protein	-1.13921	0.8778	0.14835
orf19.2711	0	Similar to S. cerevisiae Elp2, an Elongator complex subunit required for modification of wobble nucleosides in tRNA; repressed in core stress response	-1.13889	0.87805	0.09513
orf19.4930	SPC3	Essential protein; similar to S. cerevisiae Spc3p, a component of the signal peptidase complex required for signal peptidase activity; predicted integral ER membrane protein; complements spc3 and suppresses sec61 S. cerevisiae mutants	-1.13884	0.87809	0.21868
orf19.3811	GYP1	Putative Cis-golgi GTPase-activating protein; required for hyphen growth and virulence; transcript regulated by Nrg1, Mig1, and Tup1	-1.13873	0.87817	0.44406
orf19.4215	FET34	Multicopper ferroxidase; induced by low iron, ciclopirox olamine, ketoconazole, hypoxia; alkaline induced by Rim101; repressed in fluconazole-resistant isolate; Sfu1, Hog1 repressed; complements S. cerevisiae fet3; Spider biofilm induced	-1.13868	0.87821	0.40575
orf19.6165	KGD1	Putative 2-oxoglutarate dehydrogenase; regulated by Efg1 under yeast but not hyphal growth conditions; transcript induced in an RHE model of oral candidiasis; stationary phase enriched protein; Hap43-repressed; rat catheter biofilm induced	-1.13835	0.87847	0.00251
orf19.6325.1	0	Ortholog(s) have mitochondrion localization	-1.13835	0.87847	0.39947
orf19.1642	0	Ortholog of S. cerevisiae Loc1, a nuclear protein involved in asymmetric localization of ASH1 mRNA in S. cerevisiae; Hap43-induced gene; Spider biofilm induced	-1.13831	0.8785	0.01417
orf19.6707	0	Predicted vacuolar protein with a calcineurin-like phosphoesterase domain; repressed by alpha pheromone in SpiderM medium	-1.13821	0.87857	0.07213
orf19.2799	GPI8	Protein similar to S. cerevisiae Gpi8p, which is a subunit of the GPI transamidase complex that adds GPI anchors to proteins; likely to be essential for growth, based on an insertional mutagenesis strategy	-1.13815	0.87862	0.16008
orf19.4495	NDH51	Nicotinamide adenine dinucleotide dehydrogenase complex I subunit of the mitochondrial electron transport chain; required for wild-type filamentous growth; alkaline repressed; Hap43-repressed; Spider biofilm repressed	-1.13799	0.87874	0.49553
orf19.1533	0	Possible vacuolar protein; Hap43-induced gene	-1.13764	0.87901	0.0932
orf19.4005	0	Putative dephospho-CoA kinase; protein likely to be essential for growth, based on an insertional mutagenesis strategy	-1.13755	0.87908	0.02275
orf19.3873	ARC40	Protein similar to S. cerevisiae Arc40; involved in actin filament organization in S. cerevisiae; transposon mutation affects filamentous growth; rat catheter and Spider biofilm repressed	-1.13731	0.87927	0.01316
orf19.6987	DNM1	Putative dynamin-related GTPase; transcript upregulated inbRHE model of oral candidiasis; transcript regulated by Nrg1, Mig1, and Tup1	-1.1372	0.87936	0.07407
orf19.5350	0	Ortholog(s) have role in positive regulation of DNA-templated transcription, elongation, positive regulation of transcription from RNA polymerase I promoter, positive regulation of translational fidelity, protein phosphorylation	-1.13718	0.87937	0.39659
orf19.6936	RAD53	Protein involved in regulation of DNA-damage-induced filamentous growth; putative component of cell cycle checkpoint; ortholog of S. cerevisiae Rad53p, protein kinase required for cell-cycle arrest in response to DNA damage	-1.1368	0.87966	0.99226
orf19.5789	ADE8	Putative phosphoribosylglycinamide formyl-transferase, enzyme of amino acid biosynthesis pathway; upregulated in biofilm; S. cerevisiae ortholog is Gcn4p regulated; protein enriched in stationary phase yeast-form cultures	-1.13677	0.87968	0.14365
orf19.1402	CCT2	Chaperonin of the cytosolic TCP1 ring complex; protein present in exponential and stationary-phase yeast cells, but higher amounts in stationary phase; GlcNAc-induced protein	-1.13671	0.87973	0.23502
orf19.3712	0	Protein of unknown function; induced by Mnl1 under weak acid stress; flow model biofilm induced; Spider biofilm induced	-1.13641	0.87996	0.01279
orf19.7021	GPH1	Putative glycogen phosphorylase; role in glycogen metabolism; regulated by Ssk1, Mig1, Tup1, Hap43; fluconazole-induced; localizes to cell surface of hyphae, not yeast; stationary phase enriched protein; Spider biofilm induced	-1.13625	0.88009	0.07054
orf19.1250	0	Ortholog(s) have role in maturation of SSU-rRNA from tricistronic rRNA transcript (SSU-rRNA, 5.8S rRNA, LSU-rRNA) and cytoplasm, nucleolus localization	-1.13622	0.88011	0.03448
orf19.3282	BMT3	Beta-mannosyltransferase; adds 2nd beta-mannose to the acid-stable fraction of cell wall phosphopeptidomannan, elongation of beta-mannose chains on the phosphopeptidomannan acid-labile fraction; Hap43-induced; Spider biofilm induced	-1.13597	0.88031	0.76953
orf19.6379	0	Ortholog of C. dubliniensis CD36 : Cd36_33820, C. parapsilosis CDC317 : CPAR2_206210, Candida tenuis NRRL Y-1498 : CANTEDRAFT_92567 and Debaryomyces hansenii CBS767 : DEHA2E06138g	-1.13597	0.8803	0.52955
orf19.3478	NIP7	Putative nucleolar protein with role in ribosomal assembly; hyphal-induced; Hap43-induced; Spider biofilm induced	-1.13588	0.88038	0.25231
orf19.5160	0	Ortholog(s) have role in G1/S transition of mitotic cell cycle, TOR signaling, dephosphorylation, regulation of mitotic sister chromatid segregation, tRNA wobble uridine modification	-1.13578	0.88045	0.08543
orf19.487	SPT14	Putative DNA-binding transcription factor; predicted role in regulation of biogenesis of the cell wall; upregulated in biofilm; protein newly produced during adaptation to the serum	-1.13563	0.88057	0.08177
orf19.5623	ARP4	Subunit of the NuA4 histone acetyltransferase complex	-1.13554	0.88064	0.51415
orf19.5031	SSK1	Response regulator of two-component system; role in oxidative stress response, cell wall biosynthesis, virulence, hyphal growth on solid media; expressed in hyphae and yeast; peroxisomal targeting sequence (PTS1); Spider biofilm induced	-1.13534	0.88079	0.18507
orf19.5809	0	Putative arylformamidase, enzyme of the NAD biosynthesis pathway; Gcn4p-regulated	-1.13528	0.88084	0.59309
orf19.1674	CDC53	Cullin, a scaffold subunit of the SCF ubiquitin-ligase complexes; depletion leads to increased filamentous growth and premature cell death	-1.13527	0.88084	0.01681
orf19.3221	CPA2	Putative arginine-specific carbamoylphosphate synthetase; protein enriched in stationary phase yeast cultures; rat catheter biofilm induced; Spider biofilm induced	-1.13527	0.88084	0.01083
orf19.7341	0	Protein of unknown function; flow model biofilm induced; ketoconazole-repressed	-1.13525	0.88086	0.20929
orf19.872	0	Ortholog of C. dubliniensis CD36 : Cd36_18230, Debaryomyces hansenii CBS767 : DEHA2E20636g, Pichia stipitis Pignal : PICST_66811 and Spathaspora passalidarum NRRL Y-27907 : SPAPADRAFT_60843	-1.13514	0.88095	0.58705
orf19.1779	MP65	Cell surface mannoprotein; cell-wall glucan metabolism, adhesion; adhesin motif; O-glycosylation; induced by heat, germ tube formation, wall regeneration; mycelial antigen; diagnostic marker; fluconazole-repressed; Spider biofilm induced	-1.13477	0.88124	0.15144
orf19.3992	0	BLOC-1 complex subunit involved in endosomal maturation; Predicted ORF from Assembly 19; removed from Assembly 20; subsequently reinstated in Assembly 21 based on comparative genome analysis	-1.13443	0.8815	0.18188
orf19.686	0	Protein of unknown function; regulated by Nrg1	-1.1344	0.88152	0.38238
orf19.7660	VPS52	Protein required for hyphal growth; has similarity to S. cerevisiae Vps52p	-1.1343	0.8816	0.4088
orf19.6268	0	Putative cohesin complex subunit; expression downregulated in an ssr1 null mutant	-1.13404	0.8818	0.49351
orf19.1536	0	Putative vacuolar transporter; Hap43-induced; required for normal filamentous growth; mRNA binds She3 and is localized to hyphal tips	-1.13403	0.88181	0.28825
orf19.7427	0	Ortholog(s) have Golgi apparatus, fungal-type vacuole membrane localization	-1.13402	0.88182	0.02102
orf19.5802	0	Ortholog(s) have role in maturation of SSU-rRNA and cytoplasm, nucleus localization	-1.13381	0.88198	0.56003
orf19.4281	#N/A	#N/A	-1.13359	0.88215	0.24886
orf19.6489	FMP45	Predicted membrane protein induced during mating; mutation confers hypersensitivity to toxic ergosterol analog, to amphotericin B; alkaline repressed; repressed by alpha pheromone in SpiderM medium; rat catheter, Spider biofilm induced	-1.13344	0.88227	0.33982
orf19.1589.1	0	Has domain(s) with predicted catalytic activity, pyridoxal phosphate binding activity and role in biosynthetic process	-1.13305	0.88257	0.22658
orf19.4791	0	Protein of unknown function; Spider biofilm induced	-1.13291	0.88268	0.3578
orf19.4395	0	Putative actin cytoskeleton component; protein present in exponential and stationary growth phase yeast cultures	-1.13284	0.88274	0.95935
orf19.2425	HGT18	Putative glucose transporter of the major facilitator superfamily; the C. albicans glucose transporter family comprises 20 members; 12 probable membrane-spanning segments; expressed in rich medium with 2% glucose	-1.13268	0.88286	0.04356
orf19.6703	0	Ortholog of C. dubliniensis CD36 : Cd36_73260 and Candida albicans WO-1 : CAWG_05699	-1.13255	0.88297	0.28879
orf19.5615	AYR2	Putative NADPH-dependent 1-acyl dihydroxyacetone phosphate reductase; shows colony morphology-related gene regulation by Ssn6p	-1.13251	0.88299	0.72315
orf19.4102	RPN10	Putative 19S regulatory particle of the 26S proteasome; macrophage/pseudohyphal-repressed; regulated by Gcn2 and Gcn4; Spider biofilm repressed	-1.13234	0.88313	0.26198
orf19.3457	SWD3	Ortholog(s) have histone methyltransferase activity (H3-K4 specific) activity, role in chromatin silencing at telomere, histone H3-K4 methylation, telomere maintenance and Set1C/COMPASS complex localization	-1.13221	0.88323	0.06784
orf19.5681	0	Ortholog of C. dubliniensis CD36 : Cd36_50190, C. parapsilosis CDC317 : CPAR2_302680, Candida tenuis NRRL Y-1498 : CANTEDRAFT_109949 and Debaryomyces hansenii CBS767 : DEHA2G00814g	-1.13207	0.88334	0.57471
orf19.685	YHM1	Putative mitochondrial carrier protein; fungal-specific (no human or murine homolog); Hap43p-repressed gene	-1.13204	0.88336	0.29974
orf19.1314	0	Protein of unknown function; planktonic growth-induced gene	-1.13168	0.88364	0.4395
orf19.491	0	Endoplasmic reticulum (ER) protein-translocation complex subunit	-1.13162	0.88369	0.15318
orf19.3204	0	Ortholog of C. dubliniensis CD36 : Cd36_51610, C. parapsilosis CDC317 : CPAR2_303630, Candida tenuis NRRL Y-1498 : CANTEDRAFT_135125 and Debaryomyces hansenii CBS767 : DEHA2E19030g	-1.1316	0.8837	0.22436
orf19.6417	TSR1	Component of 20S pre-rRNA processing unit; repressed by prostaglandins	-1.13144	0.88383	0.00911
orf19.4430	0	Ortholog(s) have ubiquitin binding activity, role in proteasome-mediated ubiquitin-dependent protein catabolic process and cytoplasm, nucleus localization	-1.13135	0.8839	0.15696
orf19.6992	QDR2	Predicted MFS membrane transporter, member of the drug:proton antiporter (12 spanner) (DHA1) family; Spider biofilm induced	-1.13111	0.88409	0.94971
orf19.1762	OCA1	Putative protein phosphatase of the PTP family (tyrosine-specific); ortholog of S. cerevisiae Oca1; mutant is viable; mutant shows virulence defect	-1.13089	0.88426	0.14503
orf19.4451	RIA1	Putative translation elongation factor; genes encoding ribosomal subunits, translation factors, and tRNA synthetases are downregulated upon phagocytosis by murine macrophage	-1.13067	0.88443	0.15866
orf19.5260	RPN2	Putative 26S proteasome subunit; transcript regulated by Mig1; caspofungin repressed; regulated by Gcn2 and Gcn4; gene used for strain identification by multilocus sequence typing	-1.13046	0.88459	0.04305
orf19.6518	0	Predicted aldehyde dehydrogenase [NAD(P)+]; Spider biofilm induced	-1.13027	0.88474	0.32424
orf19.2329.1	RPS17B	Ribosomal protein 17B; downregulated upon phagocytosis by murine macrophages; Hap43-induced; Spider biofilm repressed	-1.13023	0.88478	0.18655
orf19.5548	LYS14	Zn(II)2Cys6 transcription factor; has similarity to S. cerevisiae Lys14, which is a transcription factor involved in the regulation of lysine biosynthesis genes	-1.13012	0.88486	0.12693
orf19.3161	0	Ortholog(s) have ATPase activator activity, RNA binding activity	-1.13007	0.8849	0.06951
orf19.4929	0	Ortholog(s) have mRNA binding, translation regulator activity and role in mitochondrial respiratory chain complex IV biogenesis, positive regulation of mitochondrial translational initiation	-1.12993	0.88501	0.10667
orf19.1142	AVT4	Putative vacuolar transporter of large neutral amino acids; induced by alpha pheromone in SpiderM medium	-1.12966	0.88523	0.15389
orf19.6094	VPS53	Ortholog(s) have role in Golgi to vacuole transport, cellular sphingolipid homeostasis, retrograde transport, endosome to Golgi and GARP complex localization	-1.12959	0.88527	0.6945
orf19.4355	0	Ortholog of C. dubliniensis CD36 : Cd36_29080, C. parapsilosis CDC317 : CPAR2_202490, Candida tenuis NRRL Y-1498 : CANTEDRAFT_112323 and Debaryomyces hansenii CBS767 : DEHA2F19184g	-1.12958	0.88529	0.78051
orf19.5170	ENA21	Predicted P-type ATPase sodium pump; Gcn4p-regulated; flucytosine, amphotericin B, or ketoconazole-induced; osmotic stress-induced; overlaps orf19.5170.1, which is annotated as a blocked reading frame; Spider biofilm induced	-1.12953	0.88532	0.09766
orf19.3912	GLN3	GATA transcription factor, involved in regulation of nitrogen starvation-induced filamentous growth; regulates transcription of Mep2 ammonium permease; regulated by Gcn2 and Gcn4; mRNA binds She3; Spider biofilm induced	-1.1295	0.88535	0.13619
orf19.1663	MNT2	Alpha-1,2-mannosyl transferase; adds 3rd mannose in cell-wall mannoprotein biosynthesis; partially redundant with Mnt1; role in adherence and virulence; expressed in yeast and hyphae; fungal-specific; Hap43-induced; Spider biofilm induced	-1.1294	0.88542	0.07431
orf19.5348	TPS3	Predicted trehalose-phosphate synthase regulatory subunit; regulated by Efg1; regulated by Tsa1, Tsa1B under H2O2 stress conditions; flow model biofilm induced (reports differ)	-1.12938	0.88544	0.32869
orf19.4960	0	Ortholog(s) have spermine synthase activity, role in pantothenate biosynthetic process, spermine biosynthetic process and cytoplasm localization	-1.12931	0.88549	0.1045
orf19.1049	0	Predicted NUDIX hydrolase domain; Hap43-induced	-1.12929	0.88551	0.00545
orf19.2670	0	Ortholog(s) have 3-hydroxyacyl-[acyl-carrier-protein] dehydratase activity, role in fatty acid biosynthetic process and mitochondrion localization	-1.1292	0.88558	0.34889
orf19.158	0	Ortholog of S. cerevisiae Apd1; required for normal localization of actin patches and normal tolerance of sodium ions and hydrogen peroxide; Hap43-induced; Spider biofilm induced	-1.12888	0.88583	0.51279
orf19.4150	0	Putative glutaredoxin; induced by nitric oxide; Spider biofilm induced	-1.12878	0.88591	0.0521
orf19.5131	0	Ortholog of S. cerevisiae Gid7, a GID complex protein; involved in proteasome-dependent catabolite inactivation of fructose-1,6-bisphosphatase; Hap43-repressed gene	-1.12877	0.88592	0.09778
orf19.1902	NOC4	Putative nucleolar protein; Hap43-induced; mutation confers resistance to 5-fluorocytosine (5-FC), 5-fluorouracil (5-FU), and tubercidin (7-deazaadenosine); Spider biofilm induced	-1.12854	0.8861	0.06476
orf19.382	TEF2	Translation elongation factor 1-alpha; genes encoding ribosomal subunits, translation factors, and tRNA synthetases are downregulated upon phagocytosis by murine macrophage	-1.12845	0.88617	0.60279
orf19.4099	ECM17	Putative sulfite reductase beta subunit; role in cell wall biogenesis; regulated by Tsa1/Tsa1B in H2O2 stress; Gcn4-regulated; Tbf1-activated; Hap43-repressed; Spider, flow, F-12/CO2 model biofilm induced	-1.12827	0.88632	0.01378
orf19.568	SPE2	Putative S-adenosylmethionine decarboxylase; Hap43-induced gene; possibly adherence-induced; Spider biofilm induced	-1.12817	0.88639	0.20603
orf19.5254	0	Protein of unknown function; repressed by nitric oxide	-1.12809	0.88646	0.63526
orf19.2401	0	Ortholog(s) have cysteine-type endopeptidase activity	-1.12804	0.88649	0.04934
orf19.334	0	Protein of unknown function; flow model biofilm induced; Spider biofilm induced; regulated by Sef1, Sfu1, and Hap43	-1.12801	0.88652	0.67017
orf19.7341.1	0	Protein of unknown function; Spider biofilm induced	-1.12795	0.88657	0.78829
orf19.1637	0	Ortholog(s) have cytosol, nucleus localization	-1.12775	0.88672	0.21816
orf19.6139	FRE7	Copper-regulated cupric reductase; repressed by ciclopirox olamine or 17-beta-estradiol; induced by alkaline conditions or interaction with macrophage; Spider biofilm induced	-1.1277	0.88676	0.39077
orf19.7234	0	Putative RSC chromatin remodeling complex component; possibly an essential gene, disruptants not obtained by UAU1 method	-1.1277	0.88676	0.50738
orf19.6886	0	Ortholog(s) have rRNA binding activity, role in maturation of LSU-rRNA from tricistronic rRNA transcript (SSU-rRNA, 5.8S rRNA, LSU-rRNA), ribosomal large subunit export from nucleus and nucleolus localization	-1.12764	0.88681	0.00763
orf19.1883	YCS4	Putative condensin complex subunit; cell-cycle regulated periodic mRNA expression	-1.1276	0.88684	0.77415
orf19.5483	0	Ortholog(s) have GTPase activity, ribosome binding activity, role in positive regulation of translation and mitochondrial matrix, mitochondrial ribosome localization	-1.1276	0.88684	0.19356
orf19.2948	SNO1	Protein with a predicted role in pyridoxine metabolism; stationary phase protein; regulated by Tup1, Efg1; Spider biofilm induced	-1.12751	0.88691	0.96278
orf19.1938	0	Ortholog of S.pombe SPCC825.05c; a predicted splicing coactivator; transcription repressed in azole-resistant strain overexpressing CDR1 and CDR2; induced by benomyl treatment	-1.12744	0.88697	0.97085
orf19.4120	LAS1	Putative bud formation and morphogenesis protein; mutation confers hypersensitivity to 5-fluorocytosine (5-FC), 5-fluorouracil (5-FU); macrophage-induced; Spider biofilm induced	-1.12736	0.88703	0.29004
orf19.6747	0	Ortholog(s) have acid phosphatase activity, role in dephosphorylation, intracellular sterol transport and cytoplasm, nucleus localization	-1.12728	0.88709	0.05774
orf19.5846	0	Putative TFIIH and nucleotide excision repair factor 3 complex subunit; possibly an essential gene, disruptants not obtained by UAU1 method	-1.12722	0.88714	0.13146
orf19.5910	0	Putative histone acetyltransferase complex subunit; induced upon low-level peroxide stress; Spider biofilm induced	-1.12687	0.88742	0.65419
orf19.6244	0	Ortholog of C. dubliniensis CD36 : Cd36_06250, C. parapsilosis CDC317 : CPAR2_206820, Candida tenuis NRRL Y-1498 : CANTEDRAFT_125137 and Debaryomyces hansenii CBS767 : DEHA2G13266g	-1.12676	0.8875	0.07094
orf19.7552	0	Putative U3-containing small subunit processome complex protein; Hap43-induced gene; repressed in core stress response; Spider biofilm induced	-1.1266	0.88762	0.03267
orf19.4236	RET2	Delta subunit of the coatomer complex (COPI); coats Golgi-derived transport vesicles; involved in retrograde transport between Golgi and ER; interacts with Crk1 in the two-hybrid system; Spider biofilm repressed	-1.1266	0.88763	0.41916
orf19.4887	ECM21	Predicted regulator of endcytosis of plasma membrane proteins; fluconazole induced, alkaline induced by Rim101; repressed by caspofungin and in azole-resistant strain overexpressing MDR1; flow model, rat catheter and Spider biofilm induced	-1.12657	0.88765	0.29817
orf19.6968	0	Protein of unknown function; Hog1-repressed; Spider biofilm induced	-1.12656	0.88765	0.18704
orf19.6054	0	Protein with a Bul1 domain; binds the ubiquitin ligase Rsp5 and is involved in intracellular trafficking of a general amino acid permease Gap1; repressed in an azole-resistant strain overexpressing MDR1; Spider biofilm induced	-1.12623	0.88792	0.2779
orf19.7518	ZCF38	Putative Zn(II)2Cys6 transcription factor	-1.12617	0.88797	0.68964
orf19.276	0	Plasma membrane-associated protein; upregulated in an azole-resistant strain that overexpresses MDR1; Hap43-repressed; Spider biofilm induced	-1.12616	0.88798	0.62777
orf19.3230	BOI2	Putative SH3-domain-containing protein; mutation confers hypersensitivity to toxic ergosterol analog; Spider biofilm induced	-1.12612	0.888	0.16397
orf19.2330	0	Putative U3 snoRNA-associated protein; Hap43-induced; transposon mutation affects filamentous growth; repressed by prostaglandins	-1.12603	0.88807	0.01146
orf19.847	YIM1	Protein similar to protease of mitochondrial inner membrane; increased transcription is observed upon benomyl treatment; macrophage-downregulated gene	-1.12601	0.88809	0.88603
orf19.6998	GTT1	Putative glutathione S-transferase; downregulated upon adherence to polystyrene; regulated upon white-opaque switching; induced in the presence of human neutrophils; oxidative stress-induced via Cap1p; regulated by Gcn2p, Gcn4p	-1.126	0.8881	0.2809
orf19.2665	MSN5	Predicted karyopherin involved in nuclear import and export of proteins; flow model biofilm induced; Spider biofilm induced	-1.12583	0.88823	0.0624
orf19.3848	0	Ortholog of C. dubliniensis CD36 : Cd36_31420, C. parapsilosis CDC317 : CPAR2_205100, Debaryomyces hansenii CBS767 : DEHA2G10648g and Pichia stipitis Pignal : PICST_32997	-1.12561	0.88841	0.08486
orf19.357	0	Ortholog(s) have role in inner mitochondrial membrane organization, mitochondrion inheritance, mitochondrion morphogenesis, negative regulation of proteolysis, protein folding, replicative cell aging	-1.12549	0.8885	0.61805
orf19.834	0	Ortholog(s) have carbohydrate binding, mannosyl-oligosaccharide 1,2-alpha-mannosidase activity, role in ER-associated ubiquitin-dependent protein catabolic process and endoplasmic reticulum lumen localization	-1.12548	0.88851	0.42093
orf19.1702	ARF3	Similar to but not orthologous to S. cerevisae Arf3; transcript filament induced; Tup1 regulated; rat catheter biofilm repressed (see Locus History Note for Assembly 19 correction)	-1.12535	0.88861	0.15037
orf19.7590	0	Putative NADH-ubiquinone oxidoreductase; identified in detergent-resistant membrane fraction (possible lipid raft component); predicted N-terminal acetylation; repressed by nitric oxide	-1.12508	0.88882	0.19232
orf19.1057	0	Ortholog of C. dubliniensis CD36 : Cd36_03980, C. parapsilosis CDC317 : CPAR2_107050, Candida tenuis NRRL Y-1498 : CANTEDRAFT_113999 and Debaryomyces hansenii CBS767 : DEHA2D12518g	-1.12507	0.88883	0.25551
orf19.5561	STE23	Ortholog of S. cerevisiae Ste23 metalloprotease; role in N-terminal processing of pro-a-factor to the mature form; Tn mutation affects filamentous growth; Spider biofilm induced	-1.12499	0.8889	0.2714
orf19.7308	TUB1	Alpha-tubulin; gene has intron; complements cold-sensitivity of S. cerevisiae tub1 mutant; C. albicans has single alpha-tubulin gene, whereas S. cerevisiae has two (TUB1, TUB3); farnesol-upregulated in biofilm; sumoylation target	-1.12496	0.88892	0.15854
orf19.2512	0	Ortholog of C. dubliniensis CD36 : Cd36_81000, C. parapsilosis CDC317 : CPAR2_103050, Candida tenuis NRRL Y-1498 : CANTEDRAFT_116326 and Debaryomyces hansenii CBS767 : DEHA2G01958g	-1.12457	0.88923	0.42226
orf19.4809	ERG12	Ortholog(s) have mevalonate kinase activity and role in ergosterol biosynthetic process, farnesyl diphosphate biosynthetic process, mevalonate pathway, isopentenyl diphosphate biosynthetic process, mevalonate pathway	-1.12436	0.88939	0.07797
orf19.6367	SSB1	HSP70 family heat shock protein; mRNA in yeast and germ tubes; at yeast cell surface, not hyphae; antigenic in human/mouse infection; macrophage, GCN-induced; possibly essential; sumoylation target; Hap43-induced; Spider biofilm repressed	-1.12433	0.88942	0.67904
orf19.6140	FRE30	Protein with similarity to ferric reductases; downregulated in response to amphotericin B, estradiol, or ciclopirox olamine, and upregulated by interaction with macrophage; un-merged from orf19.6139 in a revision of Assembly 21	-1.12402	0.88967	0.30333
orf19.3034	RLI1	Member of RNase L inhibitor (RLI) subfamily of ABC family; predicted not to be a transporter; regulated by Sef1p, Sfu1p, and Hap43p	-1.12396	0.88971	0.15708
orf19.4161	0	Ortholog(s) have SUMO transferase activity, role in DNA repair and Smc5-Smc6 complex, nucleus localization	-1.12387	0.88978	0.18789
orf19.4230	0	20S proteasome subunit (beta7); protein present in exponential and stationary growth phase yeast cultures	-1.12383	0.88982	0.14959
orf19.4906	0	Putative adhesin-like protein; positively regulated by Tbf1; Spider biofilm induced	-1.12363	0.88997	0.34518
orf19.1653	0	Has domain(s) with predicted integral component of membrane localization	-1.12334	0.8902	0.59349
orf19.808	0	Ortholog(s) have role in histone deacetylation, negative regulation of chromatin silencing at rDNA and negative regulation of chromatin silencing at silent mating-type cassette, more	-1.12334	0.8902	0.09712
orf19.753	MNN15	Putative alpha-1,3-mannosyltransferase; predicted role in protein O-linked glycosylation; Spider biofilm induced	-1.12332	0.89022	0.61124
orf19.6266	0	Protein of unknown function; Spider biofilm induced	-1.12256	0.89082	0.30786
orf19.155	URE2	Functional homolog of S. cerevisiae Ure2p, which is a regulator of nitrogen utilization, and which also has an infectious prion form called [URE3]; forms [URE3] prion when expressed in S. cerevisiae	-1.12246	0.8909	0.2727
orf19.1105.3	0	Protein of unknown function	-1.12244	0.89091	0.91762
orf19.6538	VMA11	Predicted ortholog of S. cerevisiae Tfp3/Vma11; c' subunit of the V0 subcomplex of the vacuolar ATPase; required for hemoglobin-iron utilization; Spider biofilm repressed	-1.12241	0.89094	0.18071
orf19.6298	SPB4	Putative ATP-dependent RNA helicase; flucytosine repressed; Spider biofilm induced	-1.12226	0.89106	0.01659
orf19.6167	AYR1	Putative oxidoreductase; transcriptionally induced by interaction with macrophage; rat catheter biofilm repressed	-1.12216	0.89114	0.35676
orf19.955	0	Protein of unknown function; Spider biofilm repressed	-1.12215	0.89115	0.19625
orf19.5832	HPT1	Putative hypoxanthine-guanine phosphoribosyltransferase; protein abundance affected by URA3 expression in the CAI4 strain background; protein level decreases in stationary phase; Spider biofilm induced	-1.12202	0.89125	0.33405
orf19.5676	0	Ortholog(s) have cytosol, nucleus localization	-1.12159	0.89159	0.5091
orf19.510	0	Protein of unknown function; Spider biofilm induced	-1.12157	0.89161	0.55865
orf19.3309	0	Ortholog of Candida tropicalis MYA-3404 : CTRG_04422 and Candida albicans WO-1 : CAWG_01254	-1.12144	0.89171	0.30836
orf19.2001	0	Has domain(s) with predicted L-ascorbic acid binding, iron ion binding, oxidoreductase activity, acting on paired donors, with incorporation or reduction of molecular oxygen and oxidoreductase activity, more	-1.12139	0.89175	0.24891
orf19.2667	RPF1	Putative nucleolar protein with a predicted role in the assembly and export of the large ribosomal subunit; essential for growth; rat catheter and Spider biofilm induced	-1.12127	0.89185	0.03639
orf19.4862	0	Putative integral membrane protein; S. cerevisiae ortholog Tvp23 localizes to late Golgi vesicles; rat catheter biofilm induced	-1.12115	0.89194	0.23025
orf19.4012	PCL5	Putative cyclin for Pho85 kinase; Gcn4-induced; suppresses toxicity of C. albicans Gcn4 overproduction in S. cerevisiae via increased Pho85-dependent phosphorylation and degradation of Gcn4; rat catheter and Spider biofilm induced	-1.12109	0.89199	0.03593
orf19.5669	0	Protein with B-cell receptor-associated protein 31-like domain; membrane-localized protein	-1.12097	0.89209	0.6868
orf19.3193	FCR3	bZIP transcription factor; ortholog of S. cerevisiae Yap3; partially complements fluconazole sensitivity of S. cerevisiae pdr1 pdr3; Hap43-induced; required for yeast cell adherence to silicone substrate; flow model biofilm repressed	-1.12092	0.89212	0.63632
orf19.5411	0	Ortholog(s) have NEDD8 transferase activity, role in protein neddylation and cytosol, nucleus localization	-1.12091	0.89213	0.35514
orf19.5575	0	Putative peripheral peroxisomal membrane peroxin; required for regulating peroxisome size and maintenance; Spider biofilm induced	-1.12082	0.89221	0.43311
orf19.3443	OYE2	Putative NAPDH dehydrogenase; induced by nitric oxide; Spider biofilm induced	-1.12061	0.89237	0.2993
orf19.7409	ERV25	Component of COPII-coated vesicles; transcript induced upon filamentous growth; rat catheter biofilm repressed	-1.12051	0.89245	0.53565
orf19.6438	0	Ortholog(s) have serine C-palmitoyltransferase activity, role in sphingolipid biosynthetic process and SPOTS complex localization	-1.12035	0.89258	0.10444
orf19.6100	0	Cardiolipin synthase; ortholog of S. cerevisiae Crd1; transcript is upregulated in clinical isolates from HIV+ patients with oral candidiasis; mutants are viable; Spider biofilm repressed	-1.12026	0.89265	0.57413
orf19.5517	0	Similar to alcohol dehydrogenases; induced by benomyl treatment, nitric oxide; induced in core stress response; oxidative stress-induced via Cap1; Spider biofilm repressed	-1.11982	0.893	0.13318
orf19.1159	0	Protein similar to A. nidulans CysA serine O-trans-acetylase; suggests that C. albicans uses an O-acetyl-serine (OAS) pathway of sulfur assimilation; F-12/CO2 early biofilm induced; Spider biofilm induced	-1.1198	0.89302	0.08098
orf19.7472	IFF4	Adhesin-like cell surface protein; putative GPI-anchor; null mutant germ tubes show decreased adhesion to plastic substrate; mutants are viable; Hap43-repressed gene	-1.1198	0.89302	0.12688
orf19.5358	0	Phosphorylated protein of unknown function	-1.11955	0.89322	0.24215
orf19.4242	CST20	Protein kinase of Ste20p/p65PAK family, required for wild-type mating efficiency and virulence in a mouse model; Cst20p-Hst7p-Cek1p-Cph1p MAPK pathway regulates some hyphal growth; involved in Cdc42p growth regulation	-1.11954	0.89323	0.37346
orf19.1115	GUK1	Putative guanylate kinase; identified in extracts from biofilm and planktonic cells; protein level decrease in stationary phase cultures; Hap43p-induced gene	-1.11945	0.8933	0.53086
orf19.2927	MNN11	Ortholog(s) have alpha-1,2-galactosyltransferase activity, alpha-1,6-mannosyltransferase activity	-1.11939	0.89335	0.34778
orf19.5016	0	Ortholog(s) have cytosol, nucleus localization	-1.11919	0.89351	0.24004
orf19.7312	ERG13	3-hydroxy-3-methylglutaryl coenzyme A synthase; ergosterol biosynthesis; sumoylation target; Tn mutation affects filamentation; amphotericin B, caspofungin repressed; exponential, stationary growth phase expressed; Spider biofilm repressed	-1.11919	0.8935	0.65183
orf19.2574	0	Ortholog of S. cerevisiae : MIL1, C. glabrata CBS138 : CAGL0K12584g, C. dubliniensis CD36 : Cd36_26790, C. parapsilosis CDC317 : CPAR2_800820 and Candida tenuis NRRL Y-1498 : CANTEDRAFT_128475	-1.11905	0.89362	0.04409
orf19.5877	ATF1	Putative alcohol acetyltransferase; caspofungin repressed; expression depends on Tac1p	-1.11899	0.89367	0.07442
orf19.7613	HCR1	Putative translation initiation factor; repressed upon phagocytosis by murine macrophage; Spider biofilm repressed	-1.1189	0.89373	0.01561
orf19.3573	PEX6	Ortholog(s) have ATPase activity, protein heterodimerization activity, role in fatty acid metabolic process, protein import into peroxisome matrix, receptor recycling, replicative cell aging and cytosol, nucleus, peroxisome localization	-1.11889	0.89374	0.30235
orf19.2228	0	Ortholog(s) have actin filament binding, actin monomer binding activity and role in actin cortical patch organization, actin filament depolymerization, actin filament severing, sequestering of actin monomers	-1.11881	0.89381	0.21071
orf19.6882.1	0	Ribosomal 60S subunit protein; Spider biofilm repressed	-1.11868	0.89391	0.65126
orf19.163	PAN6	Ortholog(s) have pantoate-beta-alanine ligase activity, role in pantothenate biosynthetic process and cytosol, nucleus localization	-1.11859	0.89398	0.04512
orf19.3613	0	Ortholog(s) have RNA polymerase II C-terminal domain phosphoserine binding, RNA polymerase II core binding, chromatin binding and transcription factor activity, more	-1.11831	0.8942	0.1255
orf19.4751	0	Ortholog(s) have structural constituent of ribosome activity and mitochondrial small ribosomal subunit localization	-1.11824	0.89426	0.00321
orf19.1622	YCG1	Putative condensin G	-1.11813	0.89435	0.88782
orf19.5493	GSP1	Small RAN G-protein; essential; no prenylation predicted; can rescue S. cerevisiae gsp1 viability; macrophage/pseudohyphal-induced; transcript not regulated by white-opaque, yeast-hypha switching; GlcNAc-induced; Spider biofilm repressed	-1.1181	0.89437	0.01556
orf19.5704	0	Ortholog(s) have rRNA binding activity, role in RNA splicing, mitochondrial RNA processing, mitochondrial genome maintenance, rRNA metabolic process and mitochondrion localization	-1.118	0.89445	0.13091
orf19.4324	0	Has domain(s) with predicted NADH dehydrogenase (ubiquinone) activity, electron carrier activity and membrane localization	-1.11797	0.89448	0.10387
orf19.4596	0	Protein of unknown function; Spider biofilm induced	-1.11792	0.89452	0.31873
orf19.7406	0	Ortholog of C. dubliniensis CD36 : Cd36_86220, C. parapsilosis CDC317 : CPAR2_404490, Candida tenuis NRRL Y-1498 : CANTEDRAFT_94473 and Debaryomyces hansenii CBS767 : DEHA2D01804g	-1.11784	0.89459	0.34514
orf19.3138	NOP1	Nucleolar protein; flucytosine induced; Hap43-induced; Spider biofilm repressed	-1.11783	0.89459	0.28362
orf19.3682	CWH8	Putative dolichyl pyrophosphate (Dol-P-P) phosphatase; ketoconazole-induced; expression is increased in a fluconazole-resistant isolate; clade-associated gene expression; Hap43p-induced gene	-1.11768	0.89471	0.10082
orf19.3609	UTP15	Small subunit (SSU) processome component; mutation confers resistance to 5-fluorocytosine (5-FC); physically interacts with TAP-tagged Nop1p	-1.11757	0.8948	0.34684
orf19.3435	0	Ortholog of Candida albicans WO-1 : CAWG_05215	-1.1175	0.89486	0.22595
orf19.2337	ALP1	Cystine transporter; present in pathogenic yeasts (no human or murine homolog); Spider biofilm induced	-1.11732	0.895	0.50268
orf19.6642	0	Ortholog(s) have role in ER to Golgi vesicle-mediated transport and ER to Golgi transport vesicle, endoplasmic reticulum membrane, integral component of Golgi membrane localization	-1.11705	0.89522	0.49784
orf19.4297	CKB2	Regulatory subunit of protein kinase CK2 (casein kinase II), beta' subunit; null mutants are hypersensitive to caspofungin	-1.11703	0.89523	0.07958
orf19.3788	SPC34	Subunit of the Dam1 (DASH) complex, which acts in chromosome segregation by coupling kinetochores to spindle microtubules	-1.11698	0.89527	0.14428
orf19.302	0	Ortholog(s) have Rab guanyl-nucleotide exchange factor activity, role in ER to Golgi vesicle-mediated transport and TRAPPI protein complex, TRAPPII protein complex, TRAPPIII protein complex, cytosol, nucleus localization	-1.11693	0.89531	0.023
orf19.5442	0	Ortholog of C. dubliniensis CD36 : Cd36_80240, C. parapsilosis CDC317 : CPAR2_504040, Candida tenuis NRRL Y-1498 : CANTEDRAFT_130872 and Debaryomyces hansenii CBS767 : DEHA2C06006g	-1.11666	0.89553	0.71056
orf19.3569	0	Protein of unknown function; S. cerevisiae YLR407W mutants have abnormal budding; constitutive expression independent of MTL or white-opaque status; Spider biofilm induced	-1.11659	0.89558	0.07009
orf19.5066	0	Putative pre-60S pre-ribosomal particle subunit; essential gene; S. cerevisiae ortholog RRP17 is essential; Hap43p-induced; rat catheter biofilm induced	-1.11644	0.89571	0.61399
orf19.6709	0	Predicted alpha/beta hydrolase; Spider biofilm induced	-1.11636	0.89577	0.45824
orf19.1716	URA3	Orotidine-5'-phosphate decarboxylase; pyrimidine biosynthesis; gene used as genetic marker; decreased expression when integrated at ectopic chromosomal locations can cause defects in hyphal growth and virulence; Spider biofilm repressed	-1.11626	0.89585	0.02068
orf19.1186	0	Has domain(s) with predicted role in attachment of GPI anchor to protein and GPI-anchor transamidase complex localization	-1.11591	0.89613	0.02617
orf19.6358	0	Ortholog(s) have ubiquitin conjugating enzyme activity, ubiquitin-protein transferase activity and role in free ubiquitin chain polymerization, postreplication repair, protein K63-linked ubiquitination	-1.11585	0.89618	0.09576
orf19.3737	0	Protein with a Vps9 vacuolar protein sorting protein domain; Hap43-repressed; repressed by ciclopirox olamine; Spider biofilm induced	-1.11582	0.8962	0.20228
orf19.4410	ALG1	Protein similar to S. cerevisiae Alg1p, a mannosyltransferase involved in N-linked protein glycosylation; likely to be essential for growth, based on an insertional mutagenesis strategy	-1.11582	0.8962	0.3053
orf19.1956	0	Ortholog(s) have mRNA binding activity, role in reciprocal meiotic recombination and mitochondrion localization	-1.11547	0.89648	0.56166
orf19.175	0	Ortholog of C. dubliniensis CD36 : Cd36_27430, C. parapsilosis CDC317 : CPAR2_802450, Candida tenuis NRRL Y-1498 : CANTEDRAFT_113969 and Debaryomyces hansenii CBS767 : DEHA2A13002g	-1.11519	0.89671	0.77824
orf19.6481	YPS7	Putative aspartic-type endopeptidase with limited ability to degrade alpha pheromone; mutants show increased sensitivity to alpha pheromone	-1.11511	0.89677	0.14072
orf19.4496	GDT1	Predicted Golgi Ca2+/H+ exchanger, involved in regulation of calcium homeostasis	-1.11498	0.89687	0.07446
orf19.6166	0	Ortholog of C. dubliniensis CD36 : Cd36_80810, C. parapsilosis CDC317 : CPAR2_101800, Candida tenuis NRRL Y-1498 : CANTEDRAFT_103482 and Debaryomyces hansenii CBS767 : DEHA2F17864g	-1.11498	0.89687	0.36865
orf19.1510	SRD1	Sur7 family protein with PalI-like domains; not required for stress responses; mutant is viable	-1.11493	0.89692	0.24532
orf19.3468	ALG11	Alpha-1,2-mannosyltransferase; catalyzes sequential addition of 2 terminal alpha 1,2-mannose residues to the Man5GlcNAc2-PP-dolichol intermediate during asparagine-linked glycosylation in the ER; Spider biofilm induced	-1.1149	0.89694	0.36015
orf19.1261	CGT1	mRNA 5' guanylyltransferase; small subunit of mRNA capping enzyme; binds an RNA Pol II C-terminal domain peptide; Cet1p and Cgt1p form a 2:1 complex; functional homolog of S. cerevisiae Ceg1p	-1.11487	0.89697	0.73177
orf19.5665	0	Ortholog(s) have D-arabinose 1-dehydrogenase [NAD(P)+] activity and role in dehydro-D-arabinono-1,4-lactone biosynthetic process	-1.11484	0.89699	0.41195
orf19.3212	MID1	Putative stretch-activated Ca2+ channel of the high affinity calcium uptake system; role in thigmotropism; decreased transcription is observed upon fluphenazine treatment or in an azole-resistant strain with CDR1 and CDR2 overexpression	-1.11467	0.89713	0.516
orf19.6724	FUM12	Putative fumarate hydratase; enzyme of citric acid cycle; fluconazole, Efg1 repressed; induced in high iron; protein present in exponential and stationary growth phase	-1.11467	0.89713	0.51701
orf19.3436	0	Protein with a Rho GDP-dissociation inhibitor domain; macrophage-induced gene	-1.11464	0.89715	0.23827
orf19.501	0	Ortholog(s) have rRNA (cytosine-C5-)-methyltransferase activity and role in assembly of large subunit precursor of preribosome, maturation of LSU-rRNA from tricistronic rRNA transcript (SSU-rRNA, 5.8S rRNA, LSU-rRNA), rRNA base methylation	-1.11451	0.89725	0.00629
orf19.889	THI20	Putative trifunctional enzyme of thiamine biosynthesis, degradation and salvage; Spider biofilm induced	-1.1145	0.89727	0.95388
orf19.3009	0	Ortholog(s) have nucleus-vacuole junction localization	-1.11443	0.89732	0.6669
orf19.3715	ASF1	Protein similar to S. cerevisiae Asf1p, a chromatin assembly complex component; likely to be essential for growth, based on an insertional mutagenesis strategy	-1.11443	0.89732	0.81833
orf19.3128	0	Ortholog(s) have syntaxin binding activity and role in ER to Golgi vesicle-mediated transport, positive regulation of SNARE complex assembly, retrograde vesicle-mediated transport, Golgi to ER, vesicle fusion with Golgi apparatus	-1.11438	0.89736	0.1116
orf19.3167	0	Heme A:farnesyltransferase; catalyzes the 1st step in conversion of protoheme to the heme A prosthetic group required for cytochrome c oxidase activity; Spider biofilm repressed	-1.11433	0.8974	0.19367
orf19.3787	0	Ortholog(s) have chromatin DNA binding activity and role in positive regulation of transcription from RNA polymerase II promoter, tRNA modification, tRNA threonylcarbamoyladenosine metabolic process, telomere maintenance via recombination	-1.1143	0.89743	0.9537
orf19.2982	0	Ortholog(s) have protein complex scaffold, protein kinase activator activity and role in activation of protein kinase activity, autophagosome assembly, late nucleophagy, mitophagy, pexophagy, piecemeal microautophagy of nucleus	-1.11419	0.89752	0.56457
orf19.6053	CIS2	Putative role in regulation of biogenesis of the cell wall; upregulated in biofilm; Gcn4p-regulated	-1.11419	0.89751	0.34829
orf19.4563	0	Protein of unknown function; repressed by prostaglandins; Hap43-induced, Spider biofilm induced	-1.11397	0.89769	0.01128
orf19.7642	0	Ortholog of S. cerevisiae Vps3; CORVET tethering complex component involved in vacuolar protein sorting; Hap43-repressed gene	-1.1136	0.89799	0.74056
orf19.5920	0	Ortholog of C. dubliniensis CD36 : Cd36_84570, C. parapsilosis CDC317 : CPAR2_404420, Candida tenuis NRRL Y-1498 : CANTEDRAFT_115339 and Debaryomyces hansenii CBS767 : DEHA2G13618g	-1.11356	0.89802	0.23188
orf19.1051	HTA2	Putative histone H2A; farnesol regulated; rat catheter biofilm repressed; Spider biofilm repressed; Hap43-induced	-1.11355	0.89803	0.39116
orf19.2605	PRK1	Putative protein serine/threonine kinase; mutants sensitive to growth on hydrogen peroxide medium	-1.11328	0.89825	0.09753
orf19.5831	0	Ortholog of C. parapsilosis CDC317 : CPAR2_212260, C. dubliniensis CD36 : Cd36_17620, Candida orthopsilosis Co 90-125 : CORT_0A11590 and Candida tropicalis MYA-3404 : CTRG_01348	-1.11326	0.89827	0.80051
orf19.6393	0	Putative Arf3p GTPase activating protein; Hap43p-repressed gene; possibly an essential gene, disruptants not obtained by UAU1 method	-1.11324	0.89828	0.54726
orf19.5965	0	Ortholog(s) have ubiquitin-ubiquitin ligase activity, role in ER-associated ubiquitin-dependent protein catabolic process, cellular response to ethanol, protein ubiquitination and cytoplasm, nucleus localization	-1.11318	0.89833	0.25451
orf19.4000	GRF10	Putative homeodomain transcription factor, involved in control of filamentous growth; null mutant is an adenine auxotroph; Spider biofilm induced; promoter bound by Bcr1, Tec1, Efg1, Ndt80 and Brg1	-1.11312	0.89838	0.29291
orf19.429	0	Putative non-canonical poly(A) polymerase; repressed by nitric oxide; Spider biofilm induced	-1.11312	0.89838	0.40709
orf19.2983	CDC73	Putative transcription elongation factor; cdc73 kap114 double transposon mutation affects filamentous growth; Spider biofilm repressed	-1.11303	0.89845	0.74932
orf19.3941	URA7	CTP synthase 1; flucytosine induced; protein present in exponential and stationary growth phase yeast cultures	-1.11251	0.89887	0.27144
orf19.536	0	Ortholog(s) have chromatin binding, protein complex scaffold, ubiquitin binding activity and role in histone acetylation, transcription from RNA polymerase II promoter	-1.11237	0.89898	0.48859
orf19.1934	HST3	Histone H3K56 deacetylase; reduced copy number increases opaque cell formation; repressed by MMS, hydroxyurea and high-levels of hydrogen peroxide; Hap43p-induced; ectopic expression blocks genotoxin-induced switching; nicotinamide target	-1.11233	0.89902	0.16593
orf19.6135	0	Ortholog of C. dubliniensis CD36 : Cd36_32970, C. parapsilosis CDC317 : CPAR2_701710, Candida tenuis NRRL Y-1498 : CANTEDRAFT_106599 and Debaryomyces hansenii CBS767 : DEHA2E04488g	-1.11226	0.89907	0.32761
orf19.4251	ZCF22	Predicted Zn(II)2Cys6 transcription factor	-1.11198	0.89929	0.34456
orf19.4363	SGD1	Predicted small ribosomal subunit biogenesis protein; repressed in core stress response; transcript increases in populations of cells exposed to fluconazole over multiple generations; Spider biofilm induced	-1.11192	0.89935	0.13953
orf19.4943	PSA2	Mannose-1-phosphate guanyltransferase; Hap43, macrophage-repressed; stationary phase enriched protein; Spider biofilm induced; rat catheter biofilm repressed	-1.11181	0.89943	0.73686
orf19.6141	HGT16	Putative glucose transporter of the major facilitator superfamily; the C. albicans glucose transporter family comprises 20 members; 12 probable membrane-spanning segments; gene has intron; expressed in rich medium with 2% glucose	-1.11181	0.89943	0.33649
orf19.5090	0	Ortholog(s) have tRNA-specific adenosine deaminase activity, tRNA-specific adenosine-34 deaminase activity and role in adenosine to inosine editing, tRNA modification	-1.11178	0.89946	0.33101
orf19.3331	ABC1	Putative ubiquinol-cytochrome-c reductase; induced upon adherence to polystyrene; flow model biofilm induced; Spider biofilm induced	-1.11171	0.89951	0.60428
orf19.5574	0	Ortholog(s) have mitochondrial outer membrane localization	-1.11168	0.89954	0.04996
orf19.3630	RRP8	Ribosomal protein; Hap43-induced; F-12/CO2 early biofilm and rat catheter biofilm induced	-1.11165	0.89956	0.20065
orf19.6346	0	Putative nuclear export protein; Hap43p-induced gene; decreased transcription is observed in an azole-resistant strain that overexpresses MDR1	-1.11165	0.89957	0.11625
orf19.1086	0	Ortholog(s) have mRNA binding activity and role in protein deubiquitination, regulation of ER to Golgi vesicle-mediated transport, regulation of retrograde vesicle-mediated transport, Golgi to ER, ribophagy	-1.11144	0.89973	0.11914
orf19.478	0	Protein required for fusion of cvt-vesicles and autophagosomes with the vacuole; plays a role in autophagy, protein targeting to vacuole and vesicle docking; flow model biofilm induced	-1.11144	0.89974	0.00028
orf19.3242	0	Putative TFIID and SAGA complex subunit; possibly an essential gene, disruptants not obtained by UAU1 method	-1.11142	0.89975	0.54674
orf19.2036	0	Predicted dihydrodiol dehydrogenase; ortholog of S. pombe SPAC513.06c; flow model and rat catheter biofilm repressed	-1.11141	0.89976	0.0826
orf19.2973	0	Ortholog(s) have RNA binding, flap-structured DNA binding activity and role in nuclear-transcribed mRNA poly(A) tail shortening, positive regulation of endodeoxyribonuclease activity	-1.11122	0.89991	0.02621
orf19.1393	0	Ortholog(s) have NAD transporter activity, pyruvate secondary active transmembrane transporter activity, role in NAD transmembrane transport, mitochondrial pyruvate transport and endoplasmic reticulum, mitochondrion localization	-1.11118	0.89994	0.807
orf19.6068	SVF1	Putative survival factor; stationary phase enriched protein; fluconazole-induced; regulated by Gcn4p; repressed in response to amino acid starvation (3-AT treatment); fungal-specific (no human or murine homolog)	-1.11084	0.90022	0.18824
orf19.7550	IFA14	Putative LPF family protein; Plc1-regulated; induced by alpha pheromone in SpiderM medium	-1.11076	0.90028	0.78325
orf19.2395	IME2	Putative serine/threonine protein kinase; mutation confers hypersensitivity to amphotericin B	-1.1107	0.90034	0.16274
orf19.3479	#N/A	#N/A	-1.1107	0.90033	0.0875
orf19.4468	0	Putative succinate dehydrogenase; localized to the mitochondrial membrane; Hap43p-repressed gene	-1.11066	0.90037	0.10959
orf19.7360	0	Ortholog(s) have enzyme activator activity, role in histone deubiquitination, regulation of transcription from RNA polymerase II promoter and DUBm complex, SAGA complex localization	-1.11066	0.90036	0.00757
orf19.3920	0	Ortholog(s) have protein disulfide isomerase activity, protein disulfide oxidoreductase activity, protein-disulfide reductase (glutathione) activity, role in protein folding and fungal-type vacuole localization	-1.11057	0.90043	0.47506
orf19.5351	TIF11	Translation initiation factor eIF1a; possibly transcriptionally regulated upon hyphal formation; genes encoding ribosomal subunits, translation factors, and tRNA synthetases are downregulated upon phagocytosis by murine macrophage	-1.11057	0.90044	0.01443
orf19.6667	0	Predicted histone deacetylase activity; Spider biofilm induced	-1.11056	0.90045	0.65319
orf19.6525	0	S. cerevisiae ortholog Inp1 is a peripheral membrane protein of peroxisomes involved in peroxisomal inheritance; induced by Mnl1 under weak acid stress	-1.11044	0.90055	0.36661
orf19.776	0	Ortholog(s) have role in meiotic sister chromatid cohesion, protein localization to chromosome, centromeric region, reciprocal meiotic recombination, synaptonemal complex assembly	-1.11035	0.90062	0.7072
orf19.1299	RPN6	Putative 26S proteasome subunit; Hap43p-induced gene; regulated by Gcn2p and Gcn4p	-1.11033	0.90064	0.47991
orf19.3778	0	Protein with a predicted role in ribosome biogenesis; mutation confers hypersensitivity to 5-fluorocytosine (5-FC), 5-fluorouracil (5-FU); repressed in core stress response; repressed by prostaglandins; Hap43-induced	-1.11011	0.90081	0.4566
orf19.2720	0	Cytosolic chaperonin Cct ring complex subunit; role in the assembly of actin and tubulins; Spider biofilm repressed	-1.11009	0.90083	0.33221
orf19.5209	0	Ortholog(s) have role in CVT pathway, intra-Golgi vesicle-mediated transport and Golgi transport complex localization	-1.10985	0.90103	0.60298
orf19.3756	CHR1	Predicted DEAD-box ATP-dependent RNA helicase; functional homolog of S. cerevisiae Rok1; Hap43-induced; Spider biofilm induced	-1.10979	0.90107	0.50073
orf19.4449	CCS1	Copper chaperone involved in activation and protection of superoxide dismutase Sod1p	-1.10958	0.90124	0.22533
orf19.3999	0	Ortholog(s) have fungal-type vacuole membrane localization	-1.10952	0.90129	0.08146
orf19.6063	UBP6	Putative ubiquitin-specific protease of the 26S proteasome; oxidative stress-induced via Cap1p	-1.10941	0.90138	0.17711
orf19.6045	PSD1	Phosphatidylserine decarboxylase; involved in phosphatidylethanolamine synthesis; Spider biofilm repressed	-1.10938	0.9014	0.85801
orf19.4780	0	Predicted MFS family membrane transporter, member of the drug:proton antiporter (12 spanner) (DHA1) family; Spider biofilm induced	-1.10933	0.90144	0.79043
orf19.6464	0	Protein of unknown function; induced upon adherence to polystyrene; oxidative stress-induced via Cap1	-1.10924	0.90152	0.63029
orf19.961.2	0	Ortholog(s) have mitochondrion, nucleus localization	-1.10906	0.90167	0.33905
orf19.5413	0	Ortholog(s) have role in mRNA splicing, via spliceosome and Prp19 complex, spliceosomal complex localization	-1.10905	0.90168	0.33037
orf19.4398	0	Protein of unknown function; rat catheter biofilm induced	-1.109	0.90171	0.34615
orf19.2690	0	Putative mitochondrial GTPase; required for mitochondrial morphology and genome maintenance; Spider biofilm induced	-1.10864	0.90201	0.23415
orf19.5734	POP2	Component of the Ccr4-Pop2 mRNA deadenylase; heterozygous null mutant exhibits resistance to parnafungin and cordycepin in the C. albicans fitness test	-1.10862	0.90202	0.04236
orf19.2204	0	Predicted membrane protein of unknown function; Spider biofilm induced	-1.10832	0.90227	0.22066
orf19.6099	CCT8	Chaperonin-containing T-complex subunit; role in hyphal morphogenesis, particularly starvation-induced; essential; expression in S. cerevisiae inhibits Ras2-mediated pathways; CCT8 and TRP1 overlap; Spider biofilm repressed	-1.10823	0.90234	0.6649
orf19.2045	0	Ortholog(s) have diacylglycerol kinase activity, role in phosphatidic acid biosynthetic process and integral component of endoplasmic reticulum membrane localization	-1.10816	0.9024	0.09827
orf19.1409.2	0	Protein of unknown function; Spider biofilm induced	-1.10813	0.90242	0.3011
orf19.2538	PTC2	Protein phosphatase of the Type 2C-related family (serine/threonine-specific) with a potential role in DNA damage checkpoint control; localizes to both cytoplasm and mitochondria; mutant shows virulence defect	-1.10796	0.90256	0.49683
orf19.2369	0	Ortholog(s) have ATP binding, DNA replication origin binding activity	-1.10793	0.90258	0.22308
orf19.2514	0	Predicted methyltransferase; rat catheter biofilm induced	-1.10782	0.90268	0.11361
orf19.5101	CCR4	Component of the Ccr4-Pop2 mRNA deadenylase; transposon mutation affects filamentous growth	-1.10761	0.90285	0.75644
orf19.3136	0	Ortholog(s) have transcription coactivator activity, role in carbon catabolite regulation of transcription from RNA polymerase II promoter and cytoplasm localization	-1.10757	0.90288	0.20729
orf19.2945	PUT4	Putative proline permease; fungal-specific (no human or murine homolog); repressed during the mating process	-1.1075	0.90293	0.40228
orf19.5206	0	Putative chaperone protein; role in the assembly of box H/ACA snoRNPs and thus for pre-rRNA processing; Spider biofilm induced	-1.10749	0.90294	0.13119
orf19.4163	0	Ortholog(s) have role in establishment of protein localization to plasma membrane, protein targeting to vacuole, receptor-mediated endocytosis, response to pheromone	-1.10745	0.90297	0.699
orf19.7193	0	Specificity factor required for ubiquitination; role in protein targeting to vacuole; involved in ubiquitin-dependent protein catabolism via the multivesicular body sorting pathway; Spider biofilm induced	-1.10733	0.90307	0.10567
orf19.1426	0	Ortholog of S. cerevisiae Skg6; localizes to the cell cortex, cell bud neck, cell bud tip, incipient cellular bud site, and is membrane-bound; Spider biofilm induced	-1.1072	0.90318	0.63184
orf19.2917	0	Putative GTPase; heterozygous null mutant exhibits resistance to parnafungin in the C. albicans fitness test; Hap43p-induced gene	-1.1071	0.90326	0.0732
orf19.1279	CDS1	Protein similar to S. cerevisiae Cds1p; transposon mutation affects filamentous growth	-1.10708	0.90328	0.65224
orf19.7030	SSR1	Beta-glucan associated ser/thr rich cell-wall protein with a role in cell wall structure; GPI anchor; similar mRNA abundance in yeast-form and germ tubes; detected at germ tube plasma membrane; repressed in cells treated with Congo Red	-1.10695	0.90339	0.07503
orf19.6686	ENP2	Putative nucleolar protein; essential; heterozygous mutation confers resistance to 5-fluorocytosine (5-FC), 5-fluorouracil (5-FU), and tubercidin (7-deazaadenosine); Hap43-induced; Spider biofilm induced	-1.1068	0.90351	0.13838
orf19.2183	KRE30	YEF3-subfamily ABC family protein; predicted not to be a transporter; repressed in core stress response; mutation confers hypersensitivity to amphotericin B	-1.10678	0.90353	0.28775
orf19.515	0	Has domain(s) with predicted nucleic acid binding, zinc ion binding activity	-1.10677	0.90353	0.9725
orf19.2848	0	Predicted regulatory subunit of the Atg1 signaling complex; required for vesicle formation during autophagy and the cytoplasm-to-vacuole targeting (Cvt) pathway; Spider biofilm induced	-1.10666	0.90362	0.04006
orf19.3665	SET6	Ortholog of S. cerevisiae Set6, a SET domain protein of unknown function; Hap43-induced; rat catheter and Spider biofilm induced	-1.10653	0.90372	0.02523
orf19.1667	0	Protein with a predicted SWI/SNF-related matrix-associated actin-dependent regulator of chromatin subfamily domain; Hap43-repressed gene	-1.10648	0.90377	0.24136
orf19.3249	LAG1	Putative ceramide synthase component; Hap43p-repressed gene; amphotericin B repressed	-1.10641	0.90382	0.0933
orf19.7622	SPT3	Functional homolog of S. cerevisiae Spt3p; required for virulence in mouse systemic infection; homozygous null mutant is hyperfilamentous	-1.10639	0.90384	0.06946
orf19.7260	0	Protein with a predicted NADP-dependent oxidoreductase or aldo-keto reductase domain; Hap43-repressed; Spider biofilm repressed	-1.10632	0.9039	0.46419
orf19.2541	0	Ortholog(s) have 3'-5'-exodeoxyribonuclease activity, endonuclease activity, role in apoptotic DNA fragmentation, cellular response to oxidative stress and cytosol, nucleus localization	-1.10626	0.90395	0.50151
orf19.121	ARC18	Putative ARP2/3 complex subunit; mutation confers hypersensitivity to cytochalasin D	-1.10623	0.90397	0.44618
orf19.321	0	Ortholog(s) have L-methionine transmembrane transporter activity and role in methionine import	-1.10617	0.90402	0.3281
orf19.2868	0	Protein of unknown function; induced by alpha pheromone in SpiderM medium	-1.10597	0.90418	0.06177
orf19.438	0	Has domain(s) with predicted membrane localization	-1.10596	0.90419	0.32099
orf19.1323	0	Phosphorylated protein of unknown function; Hap43p-repressed gene	-1.10587	0.90426	0.57158
orf19.5549	0	Ortholog of C. dubliniensis CD36 : Cd36_63380 and Candida albicans WO-1 : CAWG_05071	-1.10586	0.90427	0.66432
orf19.2204.2	RHO2	Ortholog(s) have GTPase activity	-1.10574	0.90437	0.72009
orf19.2527	0	Putative protein of unknown function; Hap43-induced; required for normal biofilm growth; F-12/CO2 early biofilm induced	-1.10567	0.90443	0.93919
orf19.4954	0	Ortholog(s) have endoplasmic reticulum, integral component of membrane localization	-1.10565	0.90445	0.26048
orf19.3705	PTC6	Mitochondrial protein phosphatase of the Type 2C-related family (serine/threonine-specific), functional homolog of S. cerevisiae Ptc6p; mutant shows virulence defect	-1.10557	0.90451	0.1021
orf19.261	0	Ortholog(s) have dolichol kinase activity, role in dolichyl monophosphate biosynthetic process and endoplasmic reticulum membrane localization	-1.10543	0.90463	0.02748
orf19.3462	SAR1	Functional homolog of S. cerevisiae Sar1; which is required for ER-to-Golgi protein transport; binds GTP; similar to small GTPase superfamily proteins; gene has intron; Hap43-induced; rat catheter biofilm repressed	-1.1053	0.90473	0.24778
orf19.193	0	Ortholog of C. dubliniensis CD36 : Cd36_19310, C. parapsilosis CDC317 : CPAR2_209710, Candida tenuis NRRL Y-1498 : CANTEDRAFT_113479 and Debaryomyces hansenii CBS767 : DEHA2C15114g	-1.10529	0.90474	0.06658
orf19.597	0	Protein with an aspartate aminotransferase domain; Gcn4-regulated	-1.10513	0.90487	0.58102
orf19.5459	0	mRNA polyadenylation regulating protein; Hap43-repressed; transcript is upregulated in RHE model of oral candidiasis and in clinical isolates from HIV+ patients with oral candidiasis; Spider biofilm repressed	-1.10475	0.90518	0.5558
orf19.6716	ABD1	SAM-dependent RNA methyltransferase; methylates mRNA 5' cap; binds phosphorylated RNA Pol II C-term domain peptide; does not bind mRNA TPase and mRNA GTase (Cet1,Cgt1); functional homolog of S. cerevisiae Abd1; rat catheter biofilm induced	-1.10467	0.90525	0.77246
orf19.4009	CNB1	Regulatory subunit of calcineurin B (Ca[2+]-calmodulin-regulated S/T protein phosphatase); required for wild-type resistance to fluconazole or to SDS; micafungin is fungicidal to null mutant	-1.10463	0.90528	0.1818
orf19.5129	0	Ortholog of C. dubliniensis CD36 : Cd36_72910, C. parapsilosis CDC317 : CPAR2_704100, Candida tenuis NRRL Y-1498 : CANTEDRAFT_113193 and Debaryomyces hansenii CBS767 : DEHA2E23100g	-1.10455	0.90535	0.25111
orf19.288	MET13	Putative methionine biosynthesis protein; ketoconazole-induced; amphotericin B repressed; Spider biofilm repressed	-1.10451	0.90538	0.07936
orf19.3292	0	Ortholog(s) have peptide-methionine (R)-S-oxide reductase activity, role in cellular response to oxidative stress and cytosol, mitochondrion, nucleus localization	-1.1045	0.90538	0.23522
orf19.5050	MTO1	Putative mitochondrial protein; rat catheter biofilm induced	-1.10435	0.90551	0.07681
orf19.4290	TRR1	Thioredoxin reductase; regulated by Tsa1/Tsa1B, Hap43; induced by nitric oxide, peroxide; oxidative stress-induce via Cap1; induced by human neutrophils; stationary phase enriched protein	-1.1043	0.90555	0.19733
orf19.7594	0	Protein of unknown function; Spider biofilm induced	-1.10422	0.90561	0.98396
orf19.2841	PGM2	Ortholog of S. cerevisiae Pgm2; induced in planktonic culture; Tye7p-regulated; flow model biofilm induced; rat catheter biofilm repressed	-1.10407	0.90574	0.35736
orf19.1655.3	0	Ortholog(s) have phosphatidic acid binding, phosphatidylinositol-3,5-bisphosphate binding, phosphatidylinositol-3-phosphate binding, sphingolipid binding activity	-1.10406	0.90575	0.27678
orf19.171	DBP2	Putative DEAD-box family ATP-dependent RNA helicase; flucytosine induced; repressed in core stress response	-1.10399	0.9058	0.62621
orf19.6868	0	Putative NADPH-dependent methylglyoxal reductase; homozygous transposon insertion causes decreased colony wrinkling under filamentous growth-inducing conditions, but does not block true hyphal formation in liquid media	-1.10385	0.90592	0.3781
orf19.3698	0	Protein of unknown function that may function in RNA processing; filament induced	-1.10367	0.90607	1.55676e-05
orf19.4654	0	Protein of unknown function; Spider biofilm induced	-1.10354	0.90618	0.85602
orf19.6347	0	Pre-mRNA splicing factor; important for catalytic step II of pre-mRNA splicing; possible role in cell cycle progression; Spider biofilm induced	-1.10347	0.90623	0.69694
orf19.1305	0	Ortholog(s) have tRNA (guanine-N1-)-methyltransferase activity, role in mitochondrial tRNA methylation, tRNA N1-guanine methylation and mitochondrial matrix, nucleus localization	-1.10335	0.90633	0.38838
orf19.2788	0	Has domain(s) with predicted RNA binding, pseudouridine synthase activity and role in pseudouridine synthesis	-1.10319	0.90646	0.98562
orf19.5528	MOB1	Putative mitotic exit network component; periodic mRNA expression, peak at cell-cycle G2/M phase	-1.10313	0.90651	0.89937
orf19.4796	0	Putative eIF-4E-binding repressor of CAP-dependent translation; stationary phase enriched protein	-1.10308	0.90655	0.42857
orf19.231	APL2	Phosphorylated protein of unknown function; mutation confers hypersensitivity to toxic ergosterol analog	-1.10307	0.90656	0.60496
orf19.349	0	Ortholog(s) have role in aerobic respiration, mRNA metabolic process and mitochondrial outer membrane localization	-1.10303	0.9066	0.06464
orf19.3296	0	Ortholog of C. dubliniensis CD36 : Cd36_01020, C. parapsilosis CDC317 : CPAR2_110130, Candida tenuis NRRL Y-1498 : CANTEDRAFT_93515 and Debaryomyces hansenii CBS767 : DEHA2D14542g	-1.10293	0.90668	0.65552
orf19.6237	RAC1	G-protein of RAC subfamily; required for embedded filamentous growth, not for serum-induced hyphal growth; dynamic localization at plasma membrane and nucleus; similar to, but not interchangeable with, Cdc42p; lacks S. cerevisiae homolog	-1.10288	0.90672	0.27496
orf19.4172	0	Has domain(s) with predicted hydrolase activity and role in metabolic process	-1.10286	0.90674	0.20791
orf19.4538	0	Ortholog(s) have mRNA binding, protein heterodimerization activity and role in mRNA polyadenylation, pre-mRNA cleavage required for polyadenylation, response to DNA damage checkpoint signaling	-1.10276	0.90682	0.42904
orf19.328	NPR2	Putative urea transporter; induced during infection of murine kidney, compared to growth in vitro; has murine homolog	-1.10259	0.90695	0.07051
orf19.4064	GPI7	Protein involved in attachment of GPI-linked proteins to cell wall; member of major facilitator superfamily; phosphodiesterase/nucleotide pyrophosphatase domain; similar to S. cerevisiae Gpi7p	-1.10257	0.90697	0.0511
orf19.527	0	Protein of unknown function; flow model biofilm induced	-1.10256	0.90698	0.53855
orf19.3207	CCN1	G1 cyclin; required for hyphal growth maintenance (not initiation); cell-cycle regulated transcription (G1/S); Cdc28p-Ccn1p initiates Cdc11p S394 phosphorylation on hyphal induction; expression in S. cerevisiae inhibits pheromone response	-1.1024	0.90711	0.34319
orf19.6630	0	Ortholog(s) have role in ER-associated ubiquitin-dependent protein catabolic process	-1.1023	0.9072	0.0239
orf19.2484	0	Has domain(s) with predicted peptidase activity and role in proteolysis	-1.10229	0.9072	0.52003
orf19.1933	0	Ortholog(s) have role in peroxisome organization and peroxisomal membrane localization	-1.10222	0.90726	0.72685
orf19.2012	NOT3	Transcriptional regulator; not required for buccal epithelial cell adherence or virulence in mouse systemic infection; null mutant colonies exhibit slightly decreased filamentation ratio; required for yeast adherence to silicone substrate	-1.10221	0.90727	0.02598
orf19.1777	0	Ortholog(s) have ubiquitin-specific protease activity, role in endocytosis, free ubiquitin chain depolymerization, protein deubiquitination and cell division site, cytosol, nucleus, peroxisome, transport vesicle localization	-1.10216	0.90731	0.57243
orf19.1639	0	Has domain(s) with predicted oxidoreductase activity and role in oxidation-reduction process	-1.10201	0.90744	0.48034
orf19.6023	0	Protein with a predicted multidrug transporter domain; Hap43-repressed gene	-1.10164	0.90774	0.19111
orf19.4400	0	Has domain(s) with predicted role in anaphase-promoting complex-dependent proteasomal ubiquitin-dependent protein catabolic process, regulation of mitotic metaphase/anaphase transition and anaphase-promoting complex localization	-1.10145	0.9079	0.93383
orf19.4768	0	Protein of unknown function; Spider biofilm induced	-1.10144	0.9079	0.09076
orf19.5053	0	Ortholog(s) have acetyltransferase activity, chromatin binding activity	-1.10121	0.90809	0.25653
orf19.5770	OPT8	Oligopeptide transporter; similar to Opt1 and to S. cerevisiae Ygl114wp, but not other OPTs; induced by nitric oxide, amphotericin B; expression of OPT6, 7, 8 does not complement mutants lacking Opt1, Opt2, and Opt3; Spider biofilm induced	-1.10083	0.9084	0.13177
orf19.4221	ORC4	Phosphorylated protein similar to S. cerevisiae Orc4, subunit of the origin recognition complex (ORC); induced by alpha pheromone in SpiderM medium	-1.10078	0.90845	0.42929
orf19.5165	0	Ortholog(s) have cytoplasm localization	-1.1007	0.90851	0.32017
orf19.6265.1	RPS14B	Putative ribosomal protein; repressed upon phagocytosis by murine macrophage; transcript positively regulated by Tbf1; Spider biofilm repressed	-1.1006	0.9086	0.35672
orf19.3973	0	Ortholog of Hua1, a zinc finger domain protein with sequence similarity to Type I J-proteins; flow model biofilm induced	-1.10056	0.90862	0.54454
orf19.1343	MED16	Putative RNA polymerase II mediator complex subunit; induced by nitric oxide	-1.10046	0.90871	0.04256
orf19.5970	0	Putative DNA repair helicase; transcriptionally induced by interaction with macrophage; fungal-specific (no human or murine homolog)	-1.10033	0.90882	0.27944
orf19.2078	0	Ortholog(s) have role in Golgi to vacuole transport and AP-1 adaptor complex localization	-1.10027	0.90887	0.37489
orf19.4459	0	Predicted heme-binding stress-related protein; Tn mutation affects filamentous growth; induced during chlamydospore formation in C. albicans and C. dubliniensis; Spider biofilm induced	-1.10014	0.90897	0.6634
orf19.4725	SWI6	Putative component of the MBF and SBF transcription complexes involved in G1/S cell-cycle progression; periodic mRNA expression, peak at cell-cycle G1/S phase	-1.10001	0.90908	0.86587
orf19.6751	0	Ortholog(s) have tRNA methyltransferase activity, role in cytoplasmic translation, tRNA methylation and cytosol, nucleus localization	-1.09998	0.90911	0.09996
orf19.6901	0	Ortholog(s) have RNA 7-methylguanosine cap binding, exoribonuclease activator activity, m7G(5')pppN diphosphatase activity	-1.09989	0.90918	0.08144
orf19.1360.1	0	Putative adhesin-like protein	-1.09984	0.90922	0.3644
orf19.2633	HGT14	Putative MFS glucose transporter; 20 member C. albicans glucose transporter family; 12 probable membrane-spanning segments; expressed in rich medium with 2% glucose; rat catheter and flow model biofilm induced	-1.09936	0.90962	0.13091
orf19.2565	0	Predicted intermediate filament protein; required for nuclear and mitochondrial transmission to daughter buds in S. cerevisiae; Spider biofilm induced	-1.09929	0.90968	0.42312
orf19.5194.1	0	Putative protein of unknown function; clade-associated gene expression	-1.09917	0.90978	0.60388
orf19.6757	GCY1	Aldo/keto reductase; mutation confers hypersensitivity to toxic ergosterol analog; farnesol-repressed; stationary phase enriched protein; flow model biofilm induced; Spider biofilm repressed	-1.09902	0.9099	0.50989
orf19.4464	SEN15	Similar to delta subunit of tRNA splicing endonuclease; increased transcription is observed upon fluphenazine treatment	-1.09897	0.90994	0.43582
orf19.3854	0	Ortholog of S. cerevisiae Sat4; amphotericin B induced; clade-associated gene expression; Spider biofilm induced	-1.09882	0.91007	0.21741
orf19.3285	0	Ortholog of C. dubliniensis CD36 : Cd36_25800, Candida tenuis NRRL Y-1498 : CANTEDRAFT_116265, Debaryomyces hansenii CBS767 : DEHA2E17380g and Pichia stipitis Pignal : PICST_62836	-1.09878	0.9101	0.49724
orf19.2570	MCI4	Putative NADH-ubiquinone dehydrogenase; Hap43p-repressed gene	-1.09865	0.91021	0.40093
orf19.1588	0	Putative mitochondrial protein of unknown function; regulated by Sef1p-, Sfu1p-, and Hap43p	-1.0986	0.91025	0.83212
orf19.2063	0	Ortholog of C. parapsilosis CDC317 : CPAR2_213140, C. dubliniensis CD36 : Cd36_15600, Lodderomyces elongisporus NRLL YB-4239 : LELG_01226 and Debaryomyces hansenii CBS767 : DEHA2B02442g	-1.09859	0.91026	0.70625
orf19.966	DUS4	Ortholog(s) have tRNA dihydrouridine synthase activity, role in tRNA modification and mitochondrion localization	-1.09858	0.91026	0.18553
orf19.6328	0	Putative protein of the mitochondrial intermembrane space; predicted role in acetate utilization and gluconeogenesis; Spider biofilm repressed	-1.09849	0.91034	0.98796
orf19.760	0	Ortholog(s) have role in ribosome biogenesis and mitochondrion localization	-1.09849	0.91034	0.38422
orf19.4518	0	Protein kinase of unknown function; mutants are viable	-1.09843	0.91039	0.28431
orf19.7492	SWC4	Subunit of the NuA4 histone acetyltransferase complex	-1.09843	0.91039	0.52619
orf19.4744	0	Putative phosphatidylinositol 3-phosphate (PI3P) phosphatase; repressed by alpha pheromone in SpiderM medium	-1.09838	0.91043	0.51554
orf19.6416	0	Protein involved in N-glycosylation; Spider biofilm induced; rat catheter biofilm repressed	-1.09838	0.91043	0.0604
orf19.74	SEC5	Predicted exocyst component; ortholog of S. cerevisiae Sec5p; merged with orf19.75 in Assembly 21	-1.09828	0.91051	0.36066
orf19.1439	IPK1	Ortholog of S. cerevisiae/S. pombe Ipk1; an inositol pentakisphosphate 2-kinase, a nuclear protein required for synthesis of 1,2,3,4,5,6-hexakisphosphate; Spider biofilm induced	-1.09814	0.91063	0.51895
orf19.6312	RPS3	Ribosomal protein S3; Hog1, Hap43-induced; grepressed upon phagocytosis by murine macrophage; present in exponential and stationary phase cells; Spider biofilm repressed	-1.09793	0.9108	0.26454
orf19.2649	PCL1	Cyclin homolog; transcript induced by filamentous growth; induced by alpha pheromone in SpiderM medium	-1.09787	0.91085	0.17369
orf19.4149.1	0	Protein component of the small (40S) ribosomal subunit; Spider biofilm repressed	-1.09764	0.91105	0.53276
orf19.5824	0	Protein of unknown function; rat catheter and Spider biofilm induced	-1.09749	0.91117	0.31081
orf19.6297	0	Ortholog(s) have pseudouridine synthase activity, role in mRNA pseudouridine synthesis, tRNA pseudouridine synthesis and cytosol, nucleus localization	-1.09746	0.9112	0.48401
orf19.5821	0	Ortholog of S. cerevisiae : YML002W, C. glabrata CBS138 : CAGL0L07634g, C. dubliniensis CD36 : Cd36_17530, C. parapsilosis CDC317 : CPAR2_212430 and Candida tenuis NRRL Y-1498 : CANTEDRAFT_128807	-1.09744	0.91121	0.27973
orf19.3140.1	0	Ortholog(s) have role in cellular response to DNA damage stimulus, proteasome assembly, ubiquitin-dependent protein catabolic process and cytosol, nucleus localization	-1.09739	0.91125	0.13709
orf19.2054	FGR15	Putative transcription factor with zinc finger DNA-binding motif; lacks an ortholog in S. cerevisiae; transposon mutation affects filamentous growth; caspofungin induced; mutation causes marginal increase in caspofungin sensitivity	-1.09738	0.91126	0.08764
orf19.150	TIM17	Predicted component of the Translocase of the Inner Mitochondrial membrane (TIM23 complex), involved in protein import into mitochondria	-1.0973	0.91132	0.31831
orf19.3481	0	Putative mitochondrial ATP-dependent RNA helicase of the DEAD-box family, transcription is activated in the presence of elevated CO2	-1.09699	0.91159	0.20401
orf19.5020	0	Protein of unknown function; Hap43-induced; Spider biofilm induced	-1.09693	0.91164	0.00708
orf19.274	TFC4	Putative RNA polymerase III transcription initiation factor complex (TFIIIC) subunit; induced by Mnl1 under weak acid stress; possibly essential gene, disruptants not obtained by UAU1 method	-1.0969	0.91166	0.14823
orf19.4365	0	Has domain(s) with predicted RNA methyltransferase activity and role in RNA processing	-1.0969	0.91166	0.20915
orf19.6784	PGA32	Putative GPI-anchored adhesin-like protein; induced in high iron; Spider biofilm induced	-1.09678	0.91176	0.40189
orf19.7210	0	Protein of unknown function; Spider biofilm induced	-1.09674	0.9118	0.17314
orf19.4282	IFH1	Transcription factor; forms a heterodimer with Fhl11 that is tethered to promoters by Tbf1; positively regulates rRNA and ribosomal protein gene transcription; Spider biofilm induced	-1.09659	0.91192	0.04934
orf19.7610	PTP3	Putative protein tyrosine phosphatase; hypha induced; alkaline induced; regulated by Efg1, Ras1, cAMP pathways; mutants are viable; Spider biofilm induced; rat catheter biofilm repressed; flow model biofilm repressed	-1.09657	0.91193	0.22957
orf19.5092	0	Ortholog of C. parapsilosis CDC317 : CPAR2_207660.1, C. dubliniensis CD36 : Cd36_07680, Candida tenuis NRRL Y-1498 : CANTEDRAFT_113324 and Debaryomyces hansenii CBS767 : DEHA2C11088g	-1.09652	0.91198	0.86262
orf19.3335	0	Plasma membrane protein of unknown function; colony morphology-related gene regulation by Ssn6; repressed by nitric oxide	-1.09644	0.91204	0.66634
orf19.5234	RBD1	Rhomboid-like protein; similar to putative intramembrane serine proteases; role in filamentous growth; Gcn4-regulated; caspofungin repressed; Spider biofilm induced	-1.09643	0.91205	0.18533
orf19.4634	0	Protein required for thiolation of uridine at wobble position of Gln, Lys, and Glu tRNAs; has a role in urmylation; S. cerevisiae ortholog has a role in invasive and pseudohyphal growth	-1.09633	0.91214	0.66103
orf19.5184	0	Putative Ran guanyl-nucleotide exchange factor; probable signal transducer; Spider biofilm repressed	-1.09632	0.91214	0.18849
orf19.5168	0	Ortholog(s) have role in maturation of SSU-rRNA and cytosol, nucleolus localization	-1.09626	0.91219	0.63659
orf19.5723	POX1	Predicted acyl-CoA oxidase; regulated upon white-opaque switch; upregulated upon phagocytosis; Spider biofilm induced	-1.09606	0.91236	0.23585
orf19.4157	SPS20	Peroxisomal 2,4-dienoyl-CoA reductase; stationary phase enriched protein; Spider biofilm induced	-1.09594	0.91246	0.76333
orf19.6360	0	Protein involved in pre-mRNA splicing; Spider biofilm induced	-1.09579	0.91258	0.21136
orf19.5397	0	Putative conserved oligomeric Golgi complex subunit; decreased transcription is observed upon fluphenazine treatment	-1.09573	0.91263	0.9726
orf19.5533	0	Ortholog(s) have guanyl-nucleotide exchange factor activity, ubiquitin binding activity	-1.0956	0.91274	0.10075
orf19.5052	0	Ortholog of S. cerevisiae : YFR045W, C. glabrata CBS138 : CAGL0C02013g, C. dubliniensis CD36 : Cd36_07340, C. parapsilosis CDC317 : CPAR2_208340 and Candida tenuis NRRL Y-1498 : CANTEDRAFT_116470	-1.09551	0.91282	0.50702
orf19.1404	0	Predicted tRNA dihydrouridine synthase; Spider biofilm induced	-1.09544	0.91288	0.04509
orf19.2351	NIT3	Putative nitrilase; regulated by Gcn2p and Gcn4p; protein present in exponential and stationary growth phase yeast cultures	-1.09537	0.91293	0.58102
orf19.4258	0	Puttaive pre-mRNA polyadenylation factor; heterozygous null mutant exhibits hypersensitivity to parnafungin and cordycepin in the C. albicans fitness test	-1.09533	0.91297	0.92935
orf19.528	SEC26	Secretory vesicles coatomer complex protein	-1.0951	0.91316	0.07979
orf19.6074	HBR1	Essential protein involved in regulation of MTL gene expression; hemoglobin-regulated inhibitor of white-opaque switching, may affect survival in host; activator of MTLalpha1 and MTLalpha2; transcript activated by hemoglobin	-1.09507	0.91318	0.01145
orf19.2113	0	Putative integral peroxisomal membrane protein; Hap43p-repressed gene	-1.09499	0.91325	0.58541
orf19.6437	CDC23	Similar to anaphase-promoting complex component; possibly transcriptionally regulated by Tac1p	-1.09481	0.9134	0.24061
orf19.7269	0	Putative polyamine acetyltransferase; acetylates polyamines (e.g. putrescine, spermidine, spermine) and aralkylamines (e.g. tryptamine, phenylethylamine); Spider biofilm repressed	-1.09467	0.91352	0.58677
orf19.1361	TIM23	Protein involved in mitochondrial matrix protein import	-1.09466	0.91353	0.46363
orf19.7258	DDI1	Putative DNA damage inducible v-SNARE binding protein; macrophage/pseudohyphal-repressed	-1.09457	0.9136	0.17816
orf19.3929	0	Ortholog(s) have mitochondrion localization	-1.09454	0.91362	0.35492
orf19.2368	0	Predicted component of U5 snRNP; Spider biofilm induced	-1.09449	0.91367	0.24809
orf19.773	0	Protein similar to S. cerevisiae Rsa3 predicted nucleolar protein involved in maturation of pre-60S ribosomal particles; rat catheter and Spider biofilm induced	-1.09449	0.91367	0.60705
orf19.1451	SRB9	Subunit of the RNA polymerase II mediator complex; transposon mutation affects filamentous growth; suppresses S. cerevisiae diploid filamentous (flo8, ste7, ste12, tec1) or haploid invasive (flo8) mutant growth defects	-1.09443	0.91372	0.89724
orf19.4775	CTA8	Essential transcription factor, mediates heat shock transcriptional induction; in the absence of heat stress, Cta8p levels are modulated by growth temperature to regulate basal expression of genes involved in protein folding	-1.09443	0.91372	0.03276
orf19.6136	0	Ortholog of S. cerevisiae Mrpl4, a mitochondrial ribosomal protein of the large subunit; repressed by nitric oxide	-1.09434	0.91379	0.24713
orf19.3149	LSP1	Eisosome component with a predicted role in endocytosis; protein present in exponential and stationary growth phase yeast cultures; caspofungin repressed; biofilm induced; fungal-specific (no human/murine homolog); sumoylation target	-1.09425	0.91387	0.19373
orf19.6752	0	Ortholog(s) have structural constituent of ribosome activity and mitochondrial small ribosomal subunit localization	-1.09425	0.91386	0.82556
orf19.2245	YPT72	Vacuolar Rab small monomeric GTPase involved in vacuolar biogenesis; involved in filamentous growth and virulence	-1.09414	0.91396	0.13499
orf19.5019	0	Ortholog of C. dubliniensis CD36 : Cd36_12800, C. parapsilosis CDC317 : CPAR2_203460, Candida tenuis NRRL Y-1498 : CANTEDRAFT_94106 and Debaryomyces hansenii CBS767 : DEHA2C13948g	-1.09407	0.91402	0.37283
orf19.3202	0	Ortholog of C. dubliniensis CD36 : Cd36_51590, C. parapsilosis CDC317 : CPAR2_303610, Candida tenuis NRRL Y-1498 : CANTEDRAFT_135127 and Debaryomyces hansenii CBS767 : DEHA2E19074g	-1.09403	0.91405	0.44941
orf19.2709	ZUO1	Ortholog of S. cerevisiae Zuo1; a cytosolic ribosome-associated chaperone; likely to be essential for growth, based on an insertional mutagenesis strategy; Spider biofilm repressed	-1.09395	0.91412	0.33062
orf19.6185	0	Putative pseudouridine-5'-phosphate glycosidase; overlaps orf19.6186 and orf19.6187; Spider biofilm repressed	-1.09392	0.91415	0.9058
orf19.3455	0	Putative mitochondrial inner membrane magnesium transporter; possibly an essential gene, disruptants not obtained by UAU1 method	-1.09389	0.91417	0.18
orf19.3699	TEP1	Putative protein phosphatase of the PTP family (tyrosine-specific), similar to S. cerevisiae Tep1p	-1.09382	0.91423	0.93286
orf19.4127	0	Ortholog(s) have actin filament binding activity, role in actin cortical patch localization, actin filament bundle assembly, endocytosis and actin cortical patch localization	-1.09368	0.91434	0.77023
orf19.1794	0	Ortholog(s) have RNA binding, translation regulator activity and role in Group I intron splicing, mitochondrial respiratory chain complex IV biogenesis, positive regulation of mitochondrial translation	-1.09363	0.91439	0.05815
orf19.5505	HIS7	Putative imidazole glycerol phosphate synthase; histidine biosynthesis; no human/murine homolog; transcription induced by histidine starvation; regulated by Gcn2p and Gcn4p; higher protein level in stationary phase	-1.09358	0.91443	0.41191
orf19.882	HSP78	Heat-shock protein; regulated by macrophage response, Nrg1, Mig1, Gcn2, Gcn4, Mnl1p; heavy metal (cadmium) stress-induced; stationary phase enriched protein; rat catheter and Spider biofilm induced	-1.09354	0.91446	0.82821
orf19.587	#N/A	#N/A	-1.09351	0.91449	0.13788
orf19.6586	0	Protein of unknown function; transcript induced by benomyl or in azole-resistant strain overexpressing MDR1; Ssn6 colony morphology-related regulation; induced by NO; Hap43-repressed; rat catheter and flow model biofilm induced	-1.09348	0.91451	0.36714
orf19.7426	0	Ortholog(s) have role in protein N-linked glycosylation via asparagine, protein complex assembly and oligosaccharyltransferase complex localization	-1.09345	0.91454	0.79528
orf19.4096	TAZ1	Putative lyso-phosphatidylcholine acyltransferase, required for normal phospholipid content of mitochondrial membranes; rat catheter biofilm induced	-1.09338	0.9146	0.11691
orf19.6780	MET8	Putative bifunctional dehydrogenase and ferrochelatase with a predicted role in siroheme biosynthesis; regulated by Gcn2p and Gcn4p	-1.09338	0.91459	0.11752
orf19.908	FEN12	Putative protein with a predicted role in the elongation of fatty acids; amphotericin B, caspofungin repressed	-1.09308	0.91485	0.11313
orf19.5282	0	Protein of unknown function; Hap43-repressed gene; mRNA binds to She3; repressed in hyphae; Efg1 and Efh1 regulated; 5'-UTR intron; induced by Mnl1 under weak acid stress; rat catheter biofilm induced	-1.09304	0.91488	0.17341
orf19.2437	ARC35	Putative ARP2/3 complex subunit; shows colony morphology-related gene regulation by Ssn6p; mutation confers hypersensitivity to cytochalasin D	-1.09281	0.91507	0.4246
orf19.5817	0	Ortholog(s) have Rab guanyl-nucleotide exchange factor activity and role in ER to Golgi vesicle-mediated transport, intra-Golgi vesicle-mediated transport	-1.09278	0.9151	0.21393
orf19.5650	PRO3	Delta 1-pyrroline-5-carboxylate reductase; protein induced during the mating process; alkaline induced; stationary phase enriched protein; Spider biofilm repressed	-1.09268	0.91518	0.57457
orf19.3907	0	Ortholog of Candida albicans WO-1 : CAWG_04797	-1.09261	0.91524	0.85082
orf19.3956	0	Ortholog(s) have glutaminyl-tRNA synthase (glutamine-hydrolyzing) activity and role in endoplasmic reticulum organization, glutaminyl-tRNAGln biosynthesis via transamidation	-1.09257	0.91528	0.55225
orf19.2384	MTG1	Putative mitochondrial GTPase; likely essential for respiratory competence and in large ribosomal subunit assembly; mitochondrial translation; Spider biofilm induced	-1.09238	0.91543	0.19148
orf19.537	0	Ortholog of C. dubliniensis CD36 : Cd36_29810, C. parapsilosis CDC317 : CPAR2_206030, Candida tenuis NRRL Y-1498 : CANTEDRAFT_102086 and Debaryomyces hansenii CBS767 : DEHA2F14014g	-1.09238	0.91543	0.50191
orf19.5181	NIK1	Histidine kinase involved in a two-component signaling pathway that regulates cell wall biosynthesis; required for wild-type virulence in mouse systemic infection but not for wild-type growth or drug sensitivity/resistance; 9 HAMP domains	-1.09232	0.91549	0.68292
orf19.7073	0	Ortholog of S. cerevisiae : YCL002C, C. glabrata CBS138 : CAGL0B04719g, C. dubliniensis CD36 : Cd36_70180, C. parapsilosis CDC317 : CPAR2_805360 and Candida tenuis NRRL Y-1498 : cten_CGOB_00114	-1.09232	0.91548	0.45922
orf19.1876	0	Ortholog(s) have mRNA binding activity, role in mRNA splice site selection, positive regulation of mRNA splicing, via spliceosome and U1 snRNP, U2-type prespliceosome, commitment complex, cytoplasm localization	-1.09225	0.91554	0.04439
orf19.1650	TOM6	Predicted component of the TOM (translocase of outer membrane) complex, involved in protein import into mitochondria	-1.09224	0.91555	0.61837
orf19.3467	SEC27	Ortholog(s) have ubiquitin binding activity	-1.09219	0.91559	0.19042
orf19.5175	0	Ortholog(s) have ubiquitin protein ligase activity and role in ER-associated ubiquitin-dependent protein catabolic process	-1.09218	0.9156	0.22313
orf19.458	0	Ortholog(s) have protein transmembrane transporter activity and role in chaperone-mediated protein complex assembly, mitochondrial respiratory chain complex III assembly, protein insertion into mitochondrial membrane from inner side	-1.09207	0.91569	0.36328
orf19.6583	0	Protein of unknown function; induced by alpha pheromone in SpiderM medium	-1.09207	0.91569	0.59247
orf19.5633	0	F-box domain-containing protein; flow model biofilm induced	-1.09198	0.91577	0.61395
orf19.2867	0	Ortholog(s) have phosphatidylinositol-3-phosphate binding, protein transporter activity	-1.09198	0.91577	0.01209
orf19.5064	MRPL3	Ribosomal protein of the large subunit, mitochondrial; repressed in core stress response; protein present in exponential and stationary growth phase yeast cultures	-1.09188	0.91586	0.42627
orf19.5912	MAK21	Putative 66S pre-ribosomal particle subunit; mutation confers hypersensitivity to tubercidin (7-deazaadenosine)	-1.09181	0.91591	0.07919
orf19.2630	RAD59	Protein involved in homologous recombination and DNA breaks repair; similar to S. cerevisiae Rad59p; N-terminal similarity with Rad52p	-1.09169	0.91601	0.00223
orf19.4959	0	Protein of unknown function; Spider biofilm repressed	-1.09168	0.91602	0.53847
orf19.5499	0	Ortholog(s) have 4-hydroxyphenylpyruvate dioxygenase activity and role in aromatic amino acid family biosynthetic process	-1.09166	0.91604	0.85954
orf19.6800	POS5	Protein similar to S. cerevisiae Pos5p, a mitochondrial NADH kinase involved in the oxidative stress response; planktonic growth-induced gene; likely to be essential for growth, based on an insertional mutagenesis strategy	-1.0916	0.91609	0.51533
orf19.3572	0	Ortholog of C. dubliniensis CD36 : Cd36_19880, Candida tenuis NRRL Y-1498 : CANTEDRAFT_117672, Debaryomyces hansenii CBS767 : DEHA2D11154g and Pichia stipitis Pignal : PICST_59570	-1.09152	0.91615	0.39651
orf19.2318.1	0	Ortholog(s) have inositol phosphoceramide synthase regulator activity, role in inositolphosphoceramide metabolic process and inositol phosphoceramide synthase complex, integral component of Golgi membrane localization	-1.09113	0.91648	0.43903
orf19.7512	0	Has domain(s) with predicted electron carrier activity, heme binding, iron ion binding, monooxygenase activity, oxidoreductase activity and acting on paired donors, more	-1.09099	0.9166	0.90963
orf19.3370	DOT4	Protein similar to ubiquitin C-terminal hydrolase; localizes to cell surface of hyphal cells, but not yeast-form cells; repressed upon high-level peroxide; Hap43p-induced; rat catheter biofilm induced	-1.09087	0.9167	0.43984
orf19.1244	GYP2	Ortholog(s) have GTPase activator activity, role in intracellular protein transport and cytoplasm localization	-1.09082	0.91674	0.42503
orf19.2411	SYN8	Putative endosomal SNARE; role in protein transport; rat catheter and Spider biofilm induced	-1.09072	0.91683	0.04261
orf19.4145	ZCF20	Zn(II)2Cys6 transcription factor orthologous to S. cerevisiae Hap1; regulated by Sef1, Sfu1; Hap43-induced; Spider biofilm induced	-1.09058	0.91694	0.83136
orf19.5849	CWT1	Zn2Cys6 transcription factor involved in negative regulation of nitrosative stress response; mutant has cell wall defects; transcription increased at stationary phase; has predicted PAS domain; similar to S. cerevisiae Rds2p	-1.09058	0.91694	0.09165
orf19.6377	0	Ortholog(s) have protein C-terminal leucine carboxyl O-methyltransferase activity, role in C-terminal protein methylation, cellular protein complex assembly, regulation of autophagy and mitochondrion localization	-1.09053	0.91699	0.56063
orf19.7317	UGA33	Zinc-finger transcription factor; similar to S. cerevisiae Uga3 which regulates gamma-aminobutyrate metabolism gene expression; required for yeast cell adherence to silicone substrate; rat catheter biofilm induced	-1.0905	0.91701	0.70886
orf19.3480	0	Ortholog(s) have structural constituent of ribosome activity and mitochondrial small ribosomal subunit localization	-1.09049	0.91702	0.07044
orf19.6738	VAN1	Member of Mnn9 family of mannosyltransferases; ortholog of S. cerevisiae Van1p; fungal-specific (no human or murine homolog)	-1.09048	0.91702	0.24174
orf19.232	MED7	Subunit of the RNA polymerase II mediator complex	-1.09031	0.91717	0.06354
orf19.2998	TSR2	Protein with a predicted role in pre-rRNA processing; repressed by prostaglandins	-1.0903	0.91717	0.1368
orf19.4894	0	Protein with similarity to S. cerevisiae Yer010cp, a protein of unknown function belonging to the prokaryotic RraA family; repressed by benomyl; Hap43-induced; Spider biofilm induced	-1.09022	0.91725	0.24767
orf19.3008	COQ4	Protein with a putative role in coenzyme Q biosynthesis; transcriptionally induced by interaction with macrophage; Hap43p-repressed gene	-1.09021	0.91725	0.4295
orf19.3349	0	Putative RNA polymerase II subunit B150; heterozygous null mutant exhibits resistance to parnafungin in the C. albicans fitness test	-1.09014	0.91731	0.57347
orf19.2151	NAG6	Protein required for wild-type mouse virulence and wild-type cycloheximide resistance; putative GTP-binding motif; similar to S. cerevisiae Yor165Wp; in gene cluster that encodes enzymes of GlcNAc catabolism; no human or murine homolog	-1.09003	0.9174	0.45042
orf19.4811	0	Putative tricarboxylate carrier family protein; localized to the mitochondrial membrane	-1.09003	0.9174	0.19672
orf19.746	0	Has domain(s) with predicted role in protein transport, vacuolar transport	-1.08987	0.91754	0.38576
orf19.1494	RAD23	S. cerevisiae Rad23 ortholog; binds damaged DNA; Spider biofilm repressed	-1.08966	0.91772	0.32671
orf19.1972	0	Ortholog(s) have S-adenosylmethionine-dependent methyltransferase activity, role in histone lysine methylation and cytoplasm, nuclear chromatin localization	-1.08959	0.91778	0.71524
orf19.548	CDC10	Septin, required for wild-type cell, hyphal, or chlamydospore morphology; role in virulence and kidney tissue invasion in mouse infection; forms ring at sites of cell division and filaments in mature chlamydospore; Spider biofilm repressed	-1.08941	0.91793	0.16096
orf19.2440	RTT101	Putative cullin subunit of E3 ubiquitin ligase complex, involved in response to DNA damage; induced by alpha pheromone in SpiderM medium	-1.08941	0.91793	0.03179
orf19.7032	0	Ortholog of C. dubliniensis CD36 : Cd36_70790, C. parapsilosis CDC317 : CPAR2_301530, Candida tenuis NRRL Y-1498 : CANTEDRAFT_94947 and Debaryomyces hansenii CBS767 : DEHA2A05258g	-1.0894	0.91794	0.07506
orf19.1765	0	Secreted protein; fluconazole-induced	-1.08939	0.91794	0.13255
orf19.6578	0	Predicted membrane transporter; vesicular neurotransmitter (VNT) family, major facilitator superfamily (MFS); repressed in core caspofungin response; induced in oralpharyngeal candidasis; Spider biofilm induced	-1.08898	0.91829	0.41448
orf19.7619	0	Protein with a mitochondrial distribution and morphology domain; possibly an essential gene, disruptants not obtained by UAU1 method; rat catheter and Spider biofilm induced	-1.08879	0.91845	0.22332
orf19.606	0	Protein of unknown function; Hap43-induced; Spider biofilm induced	-1.08854	0.91866	0.22494
orf19.1028	ELA1	Elongin A; F-box protein; ubiquitin-protein ligase; role in protein ubiquitination and ubiquitin-dependent protein catabolism; rat catheter biofilm induced	-1.0885	0.9187	0.21938
orf19.5034	YBP1	Protein involved in response to oxidative stress, binds and stabilizes Cap1p transcription factor in response to H2O2; essential for macrophage killing	-1.0885	0.9187	0.06752
orf19.5940	ZCF32	Predicted Zn(II)2Cys6 transcription factor; possibly an essential gene, disruptants not obtained by UAU1 method; Hap43-repressed	-1.08843	0.91875	0.01301
orf19.4432	KSP1	Putative serine/threonine protein kinase; mRNA binds She3 and is localized to hyphal tips; mutation confers hypersensitivity to amphotericin B	-1.08835	0.91882	0.21402
orf19.2194	APM4	Cargo-binding subunit of the clathrin associated protein complex (AP-2), involved in endocytosis	-1.08824	0.91891	0.78675
orf19.3142	0	Ortholog of C. dubliniensis CD36 : Cd36_46140, C. parapsilosis CDC317 : CPAR2_501210, Candida tenuis NRRL Y-1498 : CANTEDRAFT_97195 and Debaryomyces hansenii CBS767 : DEHA2E08800g	-1.08819	0.91895	0.03944
orf19.5579	0	Protein with a predicted double-strand break repair domain; Hap43-repressed gene	-1.08815	0.91899	0.95518
orf19.3908	MRV8	Protein of unknown function; Spider biofilm induced	-1.08804	0.91908	0.05192
orf19.1199	NOP5	Ortholog of S. cerevisiae Nop58; involved in pre-rRNA process; Tn mutation affects filamentous growth; macrophage/pseudohyphal-induced; physically interacts with TAP-tagged Nop1; Spider biofilm repressed	-1.08803	0.91909	0.12651
orf19.4029	0	Ortholog(s) have unfolded protein binding activity, role in ribosomal large subunit assembly and cytosol, cytosolic ribosome, nucleus, preribosome, large subunit precursor localization	-1.08803	0.9191	0.29692
orf19.1564	0	Plasma membrane-localized protein of unknown function	-1.08798	0.91913	0.6492
orf19.3278	GSY1	UDP glucose/starch glucosyltransferase; transcript repressed by yeast-hyphal switch, Efg1-regulated; strong oxidative stress induced; colony morphology-related regulation by Ssn6; stationary phase enriched; flow model biofilm induced	-1.08785	0.91924	0.48375
orf19.554	DIT2	Monooxygenase of the cytochrome P450 family; produces N,N'-bisformyl dityrosine from N-formyltyrosine; regulated by Nrg1, Mig1, and Tup1; role in chlamydospore formation; Spider biofilm induced	-1.08784	0.91925	0.65619
orf19.5825	NCB2	Beta subunit of NC2, heterodimeric regulator of transcription; activates CDR1 transcription; possibly an essential gene, disruptants not obtained by UAU1 method; conditional mutants show decreased susceptibility to azoles	-1.08781	0.91928	0.38794
orf19.6232	NPR1	Predicted serine/threonine protein kinase, involved in regulation of ammonium transport; induced in core stress response; Hap43p-repressed gene	-1.0878	0.91929	0.27576
orf19.3601	0	Has domain(s) with predicted ATP binding, nucleoside-triphosphatase activity, nucleotide binding activity	-1.08779	0.9193	0.83858
orf19.6229	CAT1	Catalase; resistance to oxidative stress, neutrophils, peroxide; role in virulence; regulated by iron, ciclopirox, fluconazole, carbon source, pH, Rim101, Ssn6, Hog1, Hap43, Sfu1, Sef1, farnesol, core stress response; Spider biofilm induced	-1.08776	0.91932	0.9116
orf19.7092	0	Putative NAD dependent epimerase/dehydratase family protein; Spider biofilm repressed	-1.08775	0.91933	0.93676
orf19.1492	PRP39	Putative component of the U1 snRNP; involved in splicing; Hap43-induced gene; Spider biofilm induced	-1.08772	0.91935	0.37387
orf19.3294	MBF1	Putative transcriptional coactivator; caspofungin repressed; involved in virulence	-1.08767	0.9194	0.34932
orf19.4025	PRE1	Putative beta 4 subunit of the 20S proteasome; Rim101-induced at acid pH; flucytosine induced; amphotericin B repressed	-1.08734	0.91968	0.16405
orf19.835	0	Ortholog(s) have role in nucleosome mobilization and Ino80 complex, cytosol localization	-1.08731	0.9197	0.46085
orf19.4549	FGR38	Protein lacking an ortholog in S. cerevisiae; member of a family of related proteins; transposon mutation affects filamentous growth; macrophage-induced gene; Hap43p-repressed gene	-1.08726	0.91975	0.24941
orf19.4404	PGA49	Putative GPI-anchored protein	-1.08718	0.91981	0.88699
orf19.96	TOP1	DNA topoisomerase I; required for wild-type growth and for wild-type mouse virulence; sensitive to camptothecin; induced upon adherence to polystyrene; rat catheter biofilm induced	-1.08714	0.91984	0.29325
orf19.3256	SLN1	Histidine kinase involved in a two-component signaling pathway that regulates cell wall biosynthesis; mutants are sensitive to growth on H2O2 medium; rat catheter and Spider biofilm induced	-1.08681	0.92012	0.44315
orf19.1082.1	0	Ortholog(s) have cytochrome-c oxidase activity, role in mitochondrial respiratory chain complex IV assembly and cytosol, mitochondrial intermembrane space, mitochondrial respiratory chain complex IV, nucleus localization	-1.08661	0.92029	0.22271
orf19.2434	NPL4	Putative ubiquitin-binding protein; regulated by Gcn2p and Gcn4p	-1.08652	0.92037	0.3581
orf19.709	PUP2	Alpha5 subunit of the 20S proteasome; macrophage/pseudohyphal-repressed; regulated by Gcn2p and Gcn4p; protein present in exponential and stationary growth phase yeast cultures	-1.08648	0.9204	0.17428
orf19.2583	PTR2	Oligopeptide transporter involved in uptake of di-/tripeptides; highly induced during chlamydospore formation in both C. albicans and C. dubliniensis	-1.08641	0.92046	0.21006
orf19.6499	0	Predicted DNA-directed RNA polymerase; role in transcription; Spider biofilm induced	-1.08617	0.92067	0.05047
orf19.6235	0	Protein of unknown function; Spider biofilm induced	-1.08606	0.92076	0.09415
orf19.5407	SOF1	Putative protein with a predicted role in 40S ribosomal subunit biogenesis; rat catheter biofilm induced	-1.08598	0.92083	0.09685
orf19.2631	0	Subunit of Elongator complex; required for modification of wobble nucleosides in tRNA in S. cerevisiae; Hap43-induced gene	-1.08597	0.92084	0.31992
orf19.3110	0	Possible mannosyltransferase; Spider biofilm induced	-1.08591	0.92088	0.06744
orf19.5591	ADO1	Adenosine kinase; heterozygous null mutant is resistant to cordycepin in C. albicans fitness test; ketoconazole-induced; protein level decrease in stationary phase cultures; sumoylation target; Spider biofilm repressed	-1.08588	0.92091	0.20096
orf19.4757	NAR1	Putative cytosolic iron-sulfur (FeS) protein assembly machinery protein; induced by nitric oxide; oxidative stress-induced via Cap1p	-1.08574	0.92103	0.07592
orf19.504	0	Ortholog(s) have ATP-dependent 3'-5' DNA helicase activity, role in nucleosome mobilization and Ino80 complex localization	-1.08574	0.92103	0.07581
orf19.4283	0	Ortholog(s) have role in cytoplasmic translational initiation	-1.08571	0.92105	0.13424
orf19.2823	RFG1	HMG domain transcriptional repressor of filamentous growth and hyphal genes; in Tup1-dependent and -independent pathways; binds DNA; transcript not regulated by oxygen or serum; not responsible for hypoxic repression; Spider biofilm induced	-1.08566	0.9211	0.62683
orf19.4530.1	0	Protein of unknown function; regulated by Nrg1, Tup1; Spider and flow model biofilm induced	-1.08558	0.92117	0.7019
orf19.5931	ARV1	Lipid transporter involved in sterol trafficking and transport of glycosylphosphatidylinositol and sphingolipid precursors	-1.08557	0.92118	0.14501
orf19.4173	0	Ortholog(s) have role in peptidyl-diphthamide biosynthetic process from peptidyl-histidine and cytoplasm localization	-1.08548	0.92125	0.35466
orf19.5071	NRP1	Ortholog(s) have cytoplasmic stress granule, nucleolus localization	-1.0854	0.92132	0.44448
orf19.2657	0	Protein of unknown function	-1.08539	0.92133	0.18357
orf19.2650.1	0	Mitochondrial ribosomal protein of the small subunit; Spider biofilm repressed	-1.08535	0.92136	0.16294
orf19.2712	HCA4	Putative role in regulation of cell wall biogenesis; Hap43p-induced gene; possibly an essential gene, disruptants not obtained by UAU1 method; flow model and rat catheter biofilm induced	-1.08532	0.92139	0.21875
orf19.5279	0	Ortholog(s) have structural constituent of ribosome activity and mitochondrial large ribosomal subunit localization	-1.08532	0.92139	0.17859
orf19.1515	CHT4	Chitinase; similar to S. cerevisiae sporulation-specific Cts2p; functionally complements A. gossypii cts2 mutant sporulation defect; homozygous null mutation causes no obvious defects; transcription decreases upon yeast-to-hyphal switch	-1.0853	0.9214	0.27098
orf19.2910	PGA43	Putative GPI-anchored protein	-1.0853	0.9214	0.46865
orf19.1434	0	Ortholog(s) have protein complex scaffold, protein kinase activator activity	-1.08528	0.92142	0.90041
orf19.4253	0	Ortholog(s) have role in negative regulation of gluconeogenesis, proteasome-mediated ubiquitin-dependent protein catabolic process, regulation of nitrogen utilization and GID complex, cytoplasm, nucleus localization	-1.08528	0.92142	0.70914
orf19.27	0	Ortholog of C. dubliniensis CD36 : Cd36_20860, C. parapsilosis CDC317 : CPAR2_104250, Candida tenuis NRRL Y-1498 : CANTEDRAFT_115100 and Debaryomyces hansenii CBS767 : DEHA2E10450g	-1.08526	0.92144	0.12161
orf19.1634	0	Has domain(s) with predicted fatty-acyl-CoA binding activity	-1.08517	0.92152	0.39149
orf19.7252	0	Ortholog of Candida albicans WO-1 : CAWG_00017	-1.08513	0.92155	0.9051
orf19.3132	0	Predicted endoplasmic reticulum zinc transporter; induced by nitric oxide	-1.08507	0.9216	0.35705
orf19.2805	PEX8	Putative peroxisomal biogenesis factor; expression regulated during planktonic growth	-1.08483	0.9218	0.32132
orf19.6949	0	Ortholog of Candida albicans WO-1 : CAWG_02687	-1.08474	0.92188	0.45419
orf19.5722	0	Ortholog(s) have DNA binding activity	-1.08471	0.9219	0.12009
orf19.7661	HMI1	ATP-dependent 3' - 5' helicase involved in maintenance of mitochondrial DNA; ortholog of S. cerevisiae Hmi1; rat catheter biofilm repressed	-1.08471	0.9219	0.08344
orf19.498	0	Putative mitochondrial ribosomal component of the small subunit; possibly an essential gene, disruptants not obtained by UAU1 method; Spider biofilm repressed	-1.08469	0.92192	0.13202
orf19.477	0	Ortholog(s) have role in mitochondrial translation and mitochondrion localization	-1.08465	0.92196	0.31984
orf19.2314	0	Protein with a role in nucleolar integrity and processing of pre-rRNA; mutation confers hypersensitivity to 5-fluorocytosine (5-FC), 5-fluorouracil (5-FU), and tubercidin (7-deazaadenosine); Hap43-induced; Spider biofilm induced	-1.08461	0.92199	0.39886
orf19.578	0	Ortholog(s) have GTPase activator activity and role in activation of GTPase activity, endocytosis, exocytosis, formin-nucleated actin cable assembly, regulation of protein localization	-1.08459	0.92201	0.30651
orf19.118	FAD2	Delta-12 fatty acid desaturase, involved in production of linoleic acid, which is a major component of membranes	-1.08456	0.92203	0.78018
orf19.2520	0	Ortholog(s) have structural constituent of ribosome activity and mitochondrial small ribosomal subunit localization	-1.08456	0.92204	0.33746
orf19.6007	0	Predicted fatty acid acyl transferase-related protein domain; repressed by prostaglandins	-1.08441	0.92216	0.01895
orf19.7064	GLN4	Putative tRNA-Gln synthetase; genes encoding ribosomal subunits, translation factors, tRNA synthetases are downregulated upon phagocytosis by murine macrophage; protein present in exponential and stationary growth phase yeast cultures	-1.08426	0.92228	0.17172
orf19.1570	ERG7	2,3-epoxysqualene-lanosterol cyclase (lanosterol synthase), conversion of 2,3-oxidosqualene to lanosterol in sterol biosynthesis; fluconazole-induced; possibly essential, disruptants not obtained by UAU1 method; rat catheter biofilm induced	-1.0841	0.92243	0.14304
orf19.3696	TOM22	Putative mitochondrial import receptor subunit; colony morphology-related gene regulation by Ssn6	-1.08408	0.92244	0.36753
orf19.2443	RGD1	GTPase activator protein; transcript induced in low iron; alkaline upregulated; localized to the bud emergence area in G1 phase and in the bud tip during S and G2 phases	-1.08407	0.92245	0.23213
orf19.5291	0	Ortholog(s) have role in phospholipid biosynthetic process and endoplasmic reticulum localization	-1.08403	0.92248	0.06223
orf19.4340	0	Ortholog of C. dubliniensis CD36 : Cd36_52890, C. parapsilosis CDC317 : CPAR2_501970, Candida tenuis NRRL Y-1498 : CANTEDRAFT_113546 and Debaryomyces hansenii CBS767 : DEHA2E09900g	-1.08394	0.92256	0.16193
orf19.3531	0	Ortholog(s) have role in regulation of DNA-dependent DNA replication initiation and DNA replication preinitiation complex, chromosome, centromeric region, endoplasmic reticulum, nuclear envelope, spindle pole body localization	-1.08384	0.92265	0.05963
orf19.6943	0	Predicted ORF from Assembly 19; removed from Assembly 20; subsequently reinstated in Assembly 21 based on comparative genome analysis	-1.08371	0.92276	0.64201
orf19.6705	0	Putative guanyl nucleotide exchange factor with Sec7 domain; required for normal filamentous growth; regulated by yeast-hyphal switch; filament induced; regulated by Nrg1, Tup1, Mob2, Hap43; mRNA binds She3; Spider biofilm induced	-1.0837	0.92277	0.58391
orf19.4159	0	Ortholog(s) have magnesium ion transmembrane transporter activity, role in magnesium ion export from mitochondrion, magnesium ion transport and mitochondrial inner membrane localization	-1.08363	0.92283	0.95649
orf19.1491	0	Ortholog(s) have RNA binding activity, role in mRNA splicing, via spliceosome and U1 snRNP, U2-type prespliceosome localization	-1.08359	0.92285	0.36629
orf19.5022	0	Ortholog(s) have inorganic cation transmembrane transporter activity and role in cellular cobalt ion homeostasis, cellular manganese ion homeostasis, cobalt ion transport, manganese ion transport	-1.08357	0.92287	0.9944
orf19.6319	0	Ortholog(s) have mRNA binding, ubiquitin-specific protease activity and role in protein deubiquitination, regulation of ER to Golgi vesicle-mediated transport, regulation of response to osmotic stress, ribophagy	-1.08343	0.923	0.16314
orf19.4182	0	Ortholog(s) have role in response to drug and mitochondrion localization	-1.08339	0.92303	0.34421
orf19.4168	0	Ortholog(s) have RNA binding, ribonuclease MRP activity, ribonuclease P activity	-1.08328	0.92312	0.93197
orf19.2070	0	Ortholog(s) have DNA translocase activity, role in chromatin remodeling, nucleosome disassembly, transcription elongation from RNA polymerase II promoter and RSC complex localization	-1.08325	0.92315	0.4572
orf19.4731	0	Ortholog(s) have role in CVT pathway, intra-Golgi vesicle-mediated transport and Golgi transport complex localization	-1.08289	0.92345	0.32383
orf19.5213.2	COX9	Putative subunit VIIa of cytochrome c oxidase; flucytosine induced	-1.08289	0.92345	0.36053
orf19.4739	MSS116	Putative DEAD-box protein; required for efficient splicing of mitochondrial Group I and II introns; Hap43-induced; rat catheter biofilm induced	-1.08281	0.92352	0.19834
orf19.23	RTA3	Similar to S. cerevisiae Rta1 (role in 7-aminocholesterol resistance) and Rsb1 (flippase); putative drug-responsive regulatory site; induced by fluphenazine, estradiol, ketoconazole, caspofungin; rat catheter biofilm induced	-1.08275	0.92357	0.19901
orf19.3321	MRS7	Member of the LETM1-like protein family, mitochondrial membrane protein	-1.08268	0.92364	0.06996
orf19.4523	0	Ortholog(s) have 5-formyltetrahydrofolate cyclo-ligase activity, role in folic acid-containing compound biosynthetic process and mitochondrion localization	-1.08264	0.92367	0.59119
orf19.2883	CSO99	Protein of unknown function; Hap43-repressed gene; protein not conserved in S. cerevisiae	-1.08262	0.92369	0.72584
orf19.5725	0	Ortholog(s) have Rab guanyl-nucleotide exchange factor activity, phosphatidylinositol-3-phosphate binding, phosphatidylinositol-5-phosphate binding, phosphatidylserine binding activity	-1.08257	0.92373	0.62231
orf19.1123	0	Dubious open reading frame	-1.08251	0.92378	0.64304
orf19.7077	0	Putative ferric reductase; induced by Mac1 under copper starvation; Plc1-regulated; Rim101-repressed	-1.08239	0.92388	0.08864
orf19.4241	0	Protein of unknown function; transcript detected on high-resolution tiling arrays	-1.08232	0.92394	0.00356
orf19.7116	0	Protein of unknown function; transcript induced in RHE model of oral candidiasis; Spider biofilm repressed	-1.08215	0.92408	0.89581
orf19.5942	0	Zinc finger protein orthologous to S. cerevisiae Itt1; repressed by adherence to polystyrene; Spider biofilm induced	-1.08204	0.92418	0.3128
orf19.7539	INO2	Transcriptional activator that forms a heterodimer with Ino4p; likely regulates genes involved in phosphatidylcholine and phosphatidylinositol biosynthesis, fatty acid beta-oxidation, and peroxisome biogenesis	-1.08204	0.92418	0.8598
orf19.2009	PEX12	Ortholog(s) have ubiquitin-protein transferase activity, role in protein import into peroxisome matrix, protein monoubiquitination and integral component of peroxisomal membrane, peroxisomal importomer complex localization	-1.08202	0.92419	0.11732
orf19.439	0	Ortholog(s) have recombinase activity, single-stranded DNA binding, structural constituent of ribosome activity	-1.08199	0.92422	0.12943
orf19.7177	KAP120	Putative karyopherin; mutation confers hypersensitivity to cytochalasin D	-1.08199	0.92422	0.19792
orf19.131.2	0	Ortholog(s) have endoplasmic reticulum localization	-1.08194	0.92427	0.2721
orf19.2984	MST1	Ortholog(s) have role in mitochondrial threonyl-tRNA aminoacylation and mitochondrion localization	-1.08187	0.92433	0.45809
orf19.6498	0	Ortholog(s) have role in RNA polymerase II complex import to nucleus, RNA polymerase III complex localization to nucleus and DNA-directed RNA polymerase II, holoenzyme, cytoplasm localization	-1.08182	0.92437	0.7107
orf19.3565	0	Ortholog of C. dubliniensis CD36 : Cd36_19830, C. parapsilosis CDC317 : CPAR2_206470, Candida tenuis NRRL Y-1498 : CANTEDRAFT_113899 and Debaryomyces hansenii CBS767 : DEHA2C05676g	-1.08175	0.92443	0.70437
orf19.4061	0	Protein of unknown function; clade-associated gene expression	-1.08163	0.92453	0.17199
orf19.2099	HIR1	Component of the HIR complex, a nucleosome assembly factor involved in chromatin formation; involved in regulation of white-opaque switching frequency	-1.08161	0.92455	0.86991
orf19.3915	0	Putative metallodipeptidase; protein present in exponential and stationary growth phase yeast; Hog1-induced; Hap43-repressed; sumoylation target; Spider biofilm repressed	-1.08155	0.9246	0.43263
orf19.3962	HAS1	Functional homolog of S. cerevisiae Has1p, which is a nucleolar protein of the DEAD-box ATP-dependent RNA helicase family that is involved in biogenesis of the ribosome, particularly the small (40S) subunit; caspofungin-downregulated	-1.08141	0.92472	0.66783
orf19.1203	SRO77	Protein with a predicted role in docking and fusion of post-Golgi vesicles with the plasma membrane; filament induced; fungal-specific (no human or murine homolog)	-1.08131	0.9248	7.73507e-05
orf19.3351	0	Protein of unknown function; Hap43-induced; Spider biofilm induced	-1.08128	0.92483	0.68036
orf19.7538	0	DNA helicase involved in rDNA replication; Spider biofilm repressed	-1.08121	0.92489	0.67178
orf19.4829	DOA1	WD repeat protein; required for ubiquitin-mediated protein degradation; role in control of cellular ubiquitin levels; may promote efficient NHEJ in postdiauxic/stationary phase; Spider biofilm repressed	-1.08119	0.9249	0.39529
orf19.5968	RDI1	Putative rho GDP dissociation inhibitor; transposon mutation affects filamentous growth; farnesol, filament-induced; regulated by Nrg1, Tup1; protein levels low in stationary phase yeast	-1.08085	0.9252	0.33748
orf19.2115	0	Putative molybdopterin-converting factor; fungal-specific (no human or murine homolog)	-1.08084	0.9252	0.36252
orf19.2693	GST2	Glutathione S transferase; induced by benomyl and in populations of cells exposed to fluconazole over multiple generations; regulated by Nrg1, Tup1; induced by nitric oxide; stationary phase enriched; Spider biofilm induced	-1.08076	0.92527	0.67329
orf19.1483	0	Ortholog(s) have copper ion binding activity, role in mitochondrial respiratory chain complex IV assembly and extrinsic component of mitochondrial inner membrane, mitochondrial intermembrane space localization	-1.08068	0.92534	0.54378
orf19.4107	0	Exopolyphosphatase, hydrolyzes inorganic polyphosphate (poly P) into Pi residues; Spider biofilm repressed	-1.08053	0.92547	0.56567
orf19.6824	TRY6	Helix-loop-helix transcription factor; regulator of yeast form adherence; required for yeast cell adherence to silicone substrate; Spider and F-12/CO2 biofilm induced; repressed by alpha pheromone in SpiderM medium	-1.08053	0.92547	0.27988
orf19.4280	0	Protein of unknown function; Spider biofilm induced; rat catheter biofilm repressed	-1.08052	0.92548	0.22245
orf19.4326	0	Ortholog(s) have role in mRNA splicing, via spliceosome, maturation of 5S rRNA and U4/U6 x U5 tri-snRNP complex localization	-1.08044	0.92555	0.21994
orf19.7409.1	0	Ortholog(s) have structural constituent of ribosome activity and mitochondrial large ribosomal subunit localization	-1.08032	0.92565	0.33491
orf19.7441	0	Ortholog(s) have role in cellular lipid metabolic process, nuclear envelope organization and nuclear envelope localization	-1.08032	0.92565	0.36827
orf19.1120	FAV2	Adhesin-like protein; induced by mating factor in MTLa/a opaque cells, in cyr1 null, in filaments; regulated by Nrg1, Rfg1, Tup1, Tec1, Efg1, Ntd80, Rob1, Brg1; induced in oralpharyngeal candidasis; Spider biofilm induced	-1.08016	0.92579	0.0106
orf19.3972	0	Ortholog(s) have role in ER to Golgi vesicle-mediated transport, retrograde transport, endosome to Golgi and ER to Golgi transport vesicle, Golgi cis cisterna, Golgi membrane, endoplasmic reticulum localization	-1.08009	0.92585	0.82047
orf19.4792	0	Protein with a regulator of G-protein signaling domain; Plc1-regulated; Spider biofilm induced; rat catheter biofilm repressed	-1.08006	0.92588	0.52838
orf19.3393	0	Putative DEAD-box helicase; Hap43-induced; Spider biofilm induced	-1.08002	0.92591	0.06053
orf19.1308	0	Predicted membrane transporter, member of the drug:proton antiporter (14 spanner) (DHA2) family, major facilitator superfamily (MFS)	-1.07999	0.92594	0.47206
orf19.3711	0	Protein with monooxygenase domains; flow model biofilm induced	-1.07987	0.92603	0.03881
orf19.2889	0	Ortholog(s) have role in chromatin remodeling, regulation of chromosome segregation and Ino80 complex, cytoplasm localization	-1.07972	0.92616	0.35553
orf19.7194	0	Protein required for virulence in reconstituted human epithelium (RHE) model of ex vivo infection; decreased transcription is observed upon fluphenazine treatment; induced upon adherence to polystyrene	-1.07972	0.92616	0.24012
orf19.6972	SMI1B	Putative cell wall assembly regulatory protein; Rim101-repressed; possibly an essential gene, disruptants not obtained by UAU1 method	-1.0797	0.92618	0.8918
orf19.5457	0	Ortholog(s) have Golgi apparatus, endoplasmic reticulum, lipid particle localization	-1.07968	0.9262	0.91513
orf19.3764	GSG1	Putative subunit of the TRAPP complex; involved in targeting of ER-to-Golgi transport vesicles; flow model biofilm induced	-1.07947	0.92638	0.42223
orf19.6582	PRE10	Alpha7 (C8) subunit of the 20S proteasome; multiple phosphorylated residues; transcript induced upon filamentous growth; Spider biofilm repressed	-1.07937	0.92647	0.1905
orf19.7095	0	Ortholog(s) have fluoride transmembrane transporter activity, role in fluoride transmembrane transport and endoplasmic reticulum, plasma membrane localization	-1.07936	0.92647	0.66853
orf19.7531	0	Protein of unknown function; stationary phase enriched protein; induced upon yeast-hypha transition; benomyl or caspofungin induced; Hap43-repressed; Spider biofilm induced	-1.07929	0.92654	0.93678
orf19.4616	POL30	Proliferating cell nuclear antigen (PCNA), forms homotrimeric sliding clamp for DNA polymerases; RNA abundance regulated by tyrosol, cell density; induced by flucytosine, interaction with macrophages; stationary phase enriched protein	-1.07919	0.92662	0.43569
orf19.7160	0	Ortholog(s) have unfolded protein binding activity	-1.07917	0.92664	0.4553
orf19.2494	0	Ortholog(s) have glutaminyl-tRNA synthase (glutamine-hydrolyzing) activity, role in glutaminyl-tRNAGln biosynthesis via transamidation, mitochondrial translation and glutamyl-tRNA(Gln) amidotransferase complex, mitochondrion localization	-1.07907	0.92673	0.58637
orf19.7615	0	Protein involved in endoplasmic reticulum (ER) to Golgi vesicle-mediated transport; putative subunit of the transport protein particle (TRAPP) complex of the cis-Golgi; Spider biofilm induced	-1.07893	0.92685	0.48978
orf19.7646	0	Ortholog(s) have role in box C/D snoRNP assembly, protein folding, rRNA processing, regulation of cell size and R2TP complex, cytoplasm, nucleus, small nucleolar ribonucleoprotein complex localization	-1.07893	0.92684	0.74105
orf19.2095	0	Ortholog(s) have role in negative regulation of transcription from RNA polymerase II promoter in response to iron and cytosol, nucleus localization	-1.07892	0.92685	0.54326
orf19.7483	CRM1	Functional homolog of S. cerevisiae Crm1, which acts in protein nuclear export; predicted to be resistant to antifungal drug leptomycin B; partially suppresses signal transduction defects of S. cerevisiae ste20 mutant	-1.07886	0.92691	0.31306
orf19.4479	0	Putative U3-containing 90S preribosome subunit; Hap43-induced; repressed in core stress response; Spider biofilm induced	-1.0788	0.92696	0.11396
orf19.3244	0	Ortholog(s) have role in mitochondrial respiratory chain complex assembly and mitochondrion localization	-1.07878	0.92697	0.45775
orf19.7554	0	Transporter; similar to the Sit1 siderophore transporter; induced by nitric oxide independent of Yhb1; repressed during chlamydospore formation in C. albicans and C. dubliniensis; rat catheter biofilm repressed	-1.07873	0.92701	0.39137
orf19.713	0	Ortholog(s) have role in hydrogen peroxide-mediated programmed cell death and cytoplasm, nucleus localization	-1.07867	0.92707	0.1783
orf19.2594	0	Ortholog(s) have RNA polymerase I activity, role in transcription of nuclear large rRNA transcript from RNA polymerase I promoter and DNA-directed RNA polymerase I complex, cytosol localization	-1.07853	0.92719	0.07337
orf19.56	ARG2	Putative enzyme of arginine biosynthesis; transcription of genes of arginine biosynthesis pathway, except for ARG2, is induced upon phagocytosis by macrophage	-1.07853	0.92719	0.03459
orf19.7410	CYM1	Putative metalloprotease of the mitochondrial intermembrane space; rat catheter biofilm induced	-1.07841	0.92729	0.03975
orf19.3227	FTH2	Putative iron transporter; similar to S. cerevisiae Fth1p	-1.07835	0.92734	0.11666
orf19.2653	0	Protein with a transient receptor potential (TRP) ion channel domain; mutants are viable; rat catheter and Spider biofilm induced; flow model biofilm repressed	-1.07833	0.92736	0.1835
orf19.4229	0	Putative polyphosphate phosphatase; role in hydrolysis of diphosphorylated inositol polyphosphates and diadenosine polyphosphates; Spider biofilm induced	-1.07833	0.92736	0.65249
orf19.2688	NAN1	Putative U3 snoRNP protein; Hap43p-induced gene; physically interacts with TAP-tagged Nop1p	-1.07824	0.92743	0.19775
orf19.2436	0	Predicted protein serine/threonine kinase; Spider biofilm induced	-1.07811	0.92755	0.38999
orf19.926	EXO1	Putative exodeoxyribonuclease; cell-cycle regulated periodic mRNA expression	-1.07809	0.92757	0.37179
orf19.5830	LHS1	Protein similar to S. cerevisiae Hsp70p; predicted Kex2p substrate; possibly essential, disruptants not obtained by UAU1 method; flow model biofilm repressed	-1.07802	0.92762	0.97812
orf19.1340	0	Putative aldose reductase; protein level decreases in stationary phase cultures; Spider biofilm repressed	-1.07791	0.92772	0.61337
orf19.4325	0	Ortholog of C. dubliniensis CD36 : Cd36_52760, C. parapsilosis CDC317 : CPAR2_303150, Candida tenuis NRRL Y-1498 : CANTEDRAFT_133407 and Debaryomyces hansenii CBS767 : DEHA2G08030g	-1.07791	0.92772	0.99813
orf19.1727	PMC1	Vacuolar calcium P-type ATPase; transcript regulated by calcineurin and fluconazole; mutant shows increased resistance to fluconazole, lithium; increased sensitivity to calcium; Spider biofilm induced	-1.07783	0.92779	0.17422
orf19.3781	0	Protein of unknown function; Hap43-repressed; Spider biofilm induced	-1.07766	0.92794	0.04394
orf19.7667	IAH1	Protein similar to S. cerevisiae Iah1p, which is involved in acetate metabolism; mutation confers hypersensitivity to tunicamycin; transposon mutation affects filamentous growth	-1.07764	0.92795	0.76433
orf19.3063	HFL1	HAP5-like; ortholog of S. cerevisiae Dpb3; third-largest subunit of DNA polymerase II (DNA polymerase epsilon); phosphorylated protein; mutants have a growth defect	-1.07761	0.92798	0.30259
orf19.5171	PMT1	Protein mannosyltransferase; required for virulence in mice and for adhesion to epithelial cells; role in hyphal growth and drug sensitivity; Als1, Sec20, Kre9, Pir1 are substrates; 1 of 5 PMT family members	-1.07755	0.92803	0.33931
orf19.7627	0	Ortholog(s) have role in establishment of cell polarity, mycelium development, spore germination and endoplasmic reticulum, hyphal tip, mitochondrion, plasma membrane localization	-1.07727	0.92828	0.32433
orf19.5995	MCA1	Putative cysteine protease with similarity to S. cerevisiae Mca1p; has a role in apoptotic cell death upon H2O2 treatment; fungal-specific (no human or murine homolog); farnesol-induced	-1.07707	0.92845	0.28089
orf19.5027	LCB2	Putative serine palmitoyltransferase component; mutation confers hypersensitivity to aureobasidin A	-1.07691	0.92858	0.55622
orf19.1710	ALI1	Putative NADH-ubiquinone oxidoreductase; in detergent-resistant membrane fraction (possible lipid raft component); predicted N-terminal acetylation; nitric oxide-repressed; plasma membrane-localized; protein decreases in stationary phase	-1.07688	0.92861	0.16308
orf19.721	0	Ortholog(s) have polynucleotide 5'-hydroxyl-kinase activity and role in cleavage in ITS2 between 5.8S rRNA and LSU-rRNA of tricistronic rRNA transcript (SSU-rRNA, 5.8S rRNA, LSU-rRNA), termination of RNA polymerase I transcription	-1.07678	0.92869	0.2077
orf19.3456	0	Protein with a predicted serine/threonine kinase and tyrosine kinase domain; possibly an essential gene, disruptants not obtained by UAU1 method	-1.07667	0.92879	0.12207
orf19.1714	PGA44	Putative GPI-anchored protein	-1.07661	0.92884	0.66699
orf19.5500	MAK16	Putative constituent of 66S pre-ribosomal particles; Hap43-induced; repressed by prostaglandins; Spider biofilm induced	-1.07655	0.92889	0.29609
orf19.6699	0	Ortholog(s) have histidinol-phosphatase activity, role in histidine biosynthetic process and cytosol, nucleus localization	-1.07655	0.92889	0.43746
orf19.454	SFL1	Transcription factor involved in negative regulation of morphogenesis, flocculation and virulence; induced in core caspofungin response; Spider biofilm induced	-1.07633	0.92908	0.92756
orf19.4323	0	Ortholog(s) have phosphatidylinositol-3-phosphate binding activity and endosome localization	-1.07624	0.92916	0.49572
orf19.2646	ZCF13	Predicted Zn(II)2Cys6 transcription factor; similar to but not the true ortholog of S. cerevisiae Hap1; mutants display decreased colonization of mouse kidneys	-1.07612	0.92926	0.16882
orf19.2187	ALG7	Protein involved in cell wall mannan biosynthesis; mutation confers hypersensitivity to tunicamycin; transcript elevated in chk1, nik1, and sln1 homozygous null mutants; possibly essential gene, disruptants not obtained by UAU1 method	-1.07611	0.92927	0.35055
orf19.557	0	Protein of unknown function; Hap43-repressed; Spider biofilm repressed	-1.07604	0.92934	0.81569
orf19.7088	0	Ortholog(s) have single-stranded telomeric DNA binding activity, role in regulation of translational fidelity, tRNA threonylcarbamoyladenosine modification, telomere maintenance and cytosol, nucleus localization	-1.07604	0.92934	0.43581
orf19.7460	0	Putative 2'-O-methyltransferase with a predicted role in tRNA modification; transcription is activated in the presence of elevated CO2	-1.07602	0.92935	0.27784
orf19.6252	0	Ortholog(s) have transcription factor activity, RNA polymerase II transcription factor binding, transcription factor activity, core RNA polymerase II binding activity	-1.07599	0.92937	0.03205
orf19.3876	ZCF19	Predicted Zn(II)2Cys6 transcription factor	-1.07582	0.92952	0.29946
orf19.4980	HSP70	Putative hsp70 chaperone; role in entry into host cells; heat-shock, amphotericin B, cadmium, ketoconazole-induced; surface localized in yeast and hyphae; antigenic in host; farnesol-downregulated in biofilm; Spider biofilm induced	-1.0757	0.92963	0.62443
orf19.4870	DBP3	Putative ATP-dependent DEAD-box RNA helicase; Hap43-induced; repressed by prostaglandins; Spider biofilm induced	-1.07563	0.92968	0.28184
orf19.2746	EMP70	Protein with a role in endosome-to-vacuole sorting; rat catheter biofilm repressed	-1.07563	0.92968	0.03366
orf19.4676	0	Protein with homology to mitochondrial intermembrane space proteins; regulated by Sef1p-, Sfu1p-, and Hap43p	-1.07544	0.92985	0.59754
orf19.7673	0	Ortholog(s) have mRNA binding activity, role in mRNA splicing, via spliceosome and U1 snRNP, U2-type prespliceosome, U4/U6 x U5 tri-snRNP complex, U5 snRNP, commitment complex, cytosol localization	-1.07536	0.92992	0.62087
orf19.2412	0	Ortholog(s) have role in late endosome to vacuole transport via multivesicular body sorting pathway and Vps55/Vps68 complex, late endosome localization	-1.07535	0.92993	0.69168
orf19.4805	0	Putative membrane protein; induced by alpha pheromone in SpiderM medium; Hap4-induced gene; Spider biofilm induced	-1.0753	0.92997	0.23663
orf19.5987	0	Ortholog(s) have tRNA (guanine-N2-)-methyltransferase activity, role in tRNA methylation and cytosol, nucleus, tRNA (m2G10) methyltransferase complex localization	-1.07525	0.93002	0.38563
orf19.7242	NCR1	Putative vacuolar membrane protein; predicted role in sphingolipid metabolism; transcript regulated by Nrg1 and Mig1; induced by prostaglandins	-1.07525	0.93002	0.898
orf19.7421	CYP5	Putative peptidyl-prolyl cis-trans isomerase; macrophage-downregulated protein level; protein level decrease in stationary phase cultures; predicted endoplasmic reticulum (ER) localization	-1.07524	0.93002	0.41632
orf19.6034	TUB2	Beta-tubulin; functional homolog of ScTub2; overproduction makes S. cerevisiae inviable; has two introns; GlcNAc, hypha fluconazole-induced; slow growth, ectopic expression increases white-to opaque switch; rat catheter biofilm repressed	-1.07503	0.93021	0.456
orf19.2000	0	Ortholog(s) have DNA helicase activity, role in establishment of sister chromatid cohesion, interstrand cross-link repair, mitotic sister chromatid cohesion and cytosol, nuclear chromatin, site of double-strand break localization	-1.07496	0.93026	0.17181
orf19.5805	DLD1	Putative D-lactate dehydrogenase; white cell-specific trancript; colony morphology-related gene regulation by Ssn6; Hap43-repressed; rat catheter biofilm induced; Spider biofilm repressed	-1.07494	0.93029	0.87519
orf19.4367	SMC1	Protein similar to chromosomal ATPases; RNA abundance regulated by tyrosol and cell density; cell-cycle regulated periodic mRNA expression	-1.07477	0.93043	0.41403
orf19.3867	RPL7	Ribosomal protein L7; repressed upon phagocytosis by murine macrophages; Hap43-induced; rat catheter and Spider biofilm induced	-1.07472	0.93047	0.18474
orf19.6187	0	possible pseudouridine monophosphate glycosidase; overlaps orf19.6185 and orf19.618; has intron; Spider biofilm repressed	-1.07468	0.93051	0.89751
orf19.930	PET9	Mitochondrial ADP/ATP carrier protein involved in ATP biosynthesis; possible lipid raft component; 3 predicted transmembrane helices; flucytosine induced; ketoconazole-induced; downregulated by Efg1p	-1.07468	0.93051	0.35019
orf19.588	0	Ortholog(s) have role in aerobic respiration and mitochondrial intermembrane space, nucleus localization	-1.07467	0.93052	0.05678
orf19.2911	SEC3	Predicted subunit of the exocyst complex, involved in exocytosis; required for hyphal growth after the first septin ring formation; interacts with septins Cdc3p, Cdc10p, and Cdc11p; localizes to a crescent on the surface of the hyphal tip	-1.0745	0.93066	0.4336
orf19.2402	SSU72	Ortholog(s) have CTD phosphatase activity, protein tyrosine phosphatase activity	-1.07442	0.93074	0.14383
orf19.5926	ARG11	Putative ornithine transporter of the mitochondrial inner membrane; induced during the mating process	-1.07438	0.93077	0.38841
orf19.7450	0	Ortholog(s) have protein binding, bridging activity, role in septin ring assembly and cellular bud neck septin ring localization	-1.07438	0.93077	0.05599
orf19.2007	0	Ortholog(s) have role in Golgi to vacuole transport, ascospore wall assembly, cellular sphingolipid homeostasis, retrograde transport, endosome to Golgi and GARP complex, mitochondrion localization	-1.07431	0.93083	0.29203
orf19.3026	MAS1	Putative mitochondrial processing protease; Hap43-repressed; transcript regulated by Nrg1; oxidative stress-induced via Cap1	-1.07431	0.93083	0.09897
orf19.4895	0	Ortholog of C. dubliniensis CD36 : Cd36_09650, C. parapsilosis CDC317 : CPAR2_805060, Candida tenuis NRRL Y-1498 : CANTEDRAFT_95780 and Debaryomyces hansenii CBS767 : DEHA2B12320g	-1.07429	0.93085	0.65206
orf19.3986	PPR1	Putative transcription factor with zinc cluster DNA-binding motif; has similarity to S. cerevisiae Ppr1p, which is a transcription factor involved in the regulation of uracil biosynthesis genes	-1.07421	0.93092	0.02666
orf19.1651	0	Ortholog of C. dubliniensis CD36 : Cd36_81960, Pichia stipitis Pignal : psti_CGOB_00163, Candida tropicalis MYA-3404 : CTRG_02378 and Candida albicans WO-1 : CAWG_02525	-1.07411	0.931	0.35111
orf19.4923.1	0	Ortholog of C. parapsilosis CDC317 : CPAR2_801655, Candida tropicalis MYA-3404 : CTRG_06172 and Candida albicans WO-1 : CAWG_02233	-1.07411	0.931	0.00336
orf19.923	THR1	Putative homoserine kinase; regulated by Tup1; amphotericin B repressed; regulated by Gcn2 and Gcn4; Spider biofilm repressed	-1.07406	0.93105	0.24074
orf19.6039	0	Ortholog(s) have SNAP receptor activity and role in ER to Golgi vesicle-mediated transport, Golgi organization, intra-Golgi vesicle-mediated transport, vesicle fusion with Golgi apparatus	-1.07405	0.93105	0.07372
orf19.1391	0	Protein with similarity to trimeric LpxA-like enzymes; Hap43-repressed gene	-1.07403	0.93107	0.39059
orf19.6084	0	Protein of unknown function; flow model biofilm induced; Spider biofilm induced	-1.07397	0.93112	0.04933
orf19.3861	SIS1	Putative Type II HSP40 co-chaperone; macrophage/pseudohyphal-repressed; heavy metal (cadmium) stress-induced; heterozygous null mutant displays sensitivity to virgineone; rat catheter biofilm induced	-1.07395	0.93115	0.77616
orf19.6702	DED81	Putative tRNA-Asn synthetase; genes encoding ribosomal subunits, translation factors, tRNA synthetases are downregulated upon phagocytosis by murine macrophage; protein enriched in stationary phase yeast cultures	-1.07377	0.9313	0.43935
orf19.2735	SEN2	Putative tRNA splicing endonuclease subunit; mutation confers hypersensitivity to toxic ergosterol analog and to amphotericin B; 5'-UTR intron; Hap43-induced; Spider biofilm induced	-1.07373	0.93134	0.46359
orf19.4354	MCM2	Phosphorylated protein of unknown function; transcription is periodic with a peak at M/G1 phase of the cell cycle	-1.07371	0.93135	0.35977
orf19.5239	0	Predicted alanine-tRNA ligase; oxidative stress-induced via Cap1	-1.07371	0.93135	0.09682
orf19.6840	0	Protein of unknown function; transcript detected in high-resolution tiling arrays; transcription induced by alpha pheromone in SpiderM medium; Spider and early-stage flow model biofilm induced	-1.07371	0.93135	0.86026
orf19.5182	POL3	Large subunit of DNA polymerase III; partially complements defects of an S. cerevisiae cdc2 mutant; differing reports about periodic (G1/S) or non-periodic mRNA expression through cell cycle; Hap43p-repressed	-1.07366	0.9314	0.36163
orf19.4082	DDR48	Immunogenic stress-associated protein; filamentation regulated; induced by benomyl/caspofungin/ketoconazole or in azole-resistant strain; Hog1, farnesol, alkaline repressed; stationary phase enriched; Spider, flow model biofilm induced	-1.07358	0.93146	0.82355
orf19.2959	0	Predicted ORF from Assembly 19; removed from Assembly 20; subsequently reinstated in Assembly 21 based on comparative genome analysis	-1.07348	0.93155	0.88049
orf19.1623	CAP1	AP-1 bZIP transcription factor; apoptotic, oxidative stress response/resistance, multidrug resistance; nuclear in oxidative stress; complements S. cerevisiae yap1 mutant; oralpharyngeal candidasis-, human neutrophil, Spider biofilm induced	-1.07342	0.9316	0.56614
orf19.1993	0	Ortholog(s) have structural molecule activity, role in proteasome assembly, ubiquitin-dependent protein catabolic process and nucleus, proteasome regulatory particle, lid subcomplex, proteasome storage granule localization	-1.07339	0.93163	0.22393
orf19.6398	0	S. pombe ortholog SPBC460.04c is a predicted sulfonate/alpha-ketoglutare dioxygenase; induced by nitric oxide; Spider biofilm induced	-1.07334	0.93167	0.32375
orf19.3818	GOA1	Protein required for respiratory growth, resistance to oxidants, chlamydospore formation, hyphal growth under some conditions, and virulence; relocalizes from the cytoplasm to the mitochondrion during oxidative or osmotic stress	-1.07325	0.93175	0.53202
orf19.4209	0	Ortholog(s) have NEDD8 activating enzyme activity, role in protein neddylation and cytosol, nucleus localization	-1.07325	0.93175	0.41044
orf19.4001	0	Ortholog(s) have role in protein insertion into mitochondrial membrane from inner side and extrinsic component of mitochondrial inner membrane, mitochondrial matrix localization	-1.07323	0.93177	0.17181
orf19.4003	TIP20	Protein interacting with Sec20p, possibly involved in retrograde transport between the Golgi and the endoplasmic reticulum; similar to S. cerevisiae Tip20p	-1.0731	0.93188	0.70698
orf19.7197	0	Putative intranuclear transport and DNA replication mediator; heterozygous null mutant exhibits resistance to parnafungin in the C. albicans fitness test; Spider biofilm induced	-1.07299	0.93198	0.2831
orf19.5875	VAM3	Predicted syntaxin-like vacuolar t-SNARE, involved in vacuolar inheritance	-1.07298	0.93198	0.86247
orf19.4953	0	Putative ATPase; predicted role in ER-associated protein catabolism; induced during chlamydospore formation in both C. albicans and C. dubliniensis; rat catheter biofilm repressed	-1.07289	0.93206	0.19547
orf19.7481	MDH1	Mitochondrial malate dehydrogenase; regulated by Mig1, Tup1, white-opaque switch, phagocytosis; induced in high iron; antigenic during murine and human infection; repressed in Spider biofilms by Bcr1, Tec1, Ndt80, Rob1, Brg1	-1.07282	0.93212	0.12778
orf19.1448.1	0	Ortholog(s) have ATP-dependent microtubule motor activity, plus-end-directed activity	-1.07278	0.93216	0.21272
orf19.6873	RPS8A	Small 40S ribosomal subunit protein; induced by ciclopirox olamine; repressed upon phagocytosis by murine macrophage; 5'-UTR intron; Hap43-induced; Spider biofilm repressed	-1.07276	0.93217	0.44482
orf19.4772	SSU81	Predicted adaptor protein involved in activation of MAP kinase-dependent signaling pathways; links response to oxidative stress to morphogenesis and cell wall biosynthesis; caspofungin repressed	-1.07273	0.9322	0.13933
orf19.4912	0	Ortholog(s) have ubiquitin protein ligase binding activity and role in positive regulation of receptor internalization, protein ubiquitination, ubiquitin-dependent endocytosis	-1.0727	0.93223	0.37943
orf19.6904	GCN3	Putative translation initiator; downregulated in the presence of human whole blood or polymorphonuclear (PMN) cells	-1.0727	0.93223	0.74114
orf19.1631	ERG6	Delta(24)-sterol C-methyltransferase, converts zymosterol to fecosterol, ergosterol biosynthesis; mutation confers nystatin resistance; Hap43, GlcNAc-, fluconazole-induced; upregulated in azole-resistant strain; Spider biofilm repressed	-1.07269	0.93224	0.05548
orf19.7190	OGG1	Mitochondrial glycosylase/lyase; repairs oxidative damage to mitochondrial DNA, contributes to UVA resistance, role in base-excision repair; Spider biofilm induced	-1.07262	0.9323	0.74573
orf19.3951	TIP1	Protein with a predicted role in biogenesis of ER-derived COPII transport vesicles; mutation confers hypersensitivity to toxic ergosterol analog	-1.07257	0.93234	0.7616
orf19.4339	VPS4	AAA-ATPase involved in transport from MVB to the vacuole and ESCRT-III complex disassembly; mutation decreases SAP secretion and virulence in murine intravenous infection; regulated by Gcn2p, Gcn4p; required for normal Rim8p processing	-1.07237	0.93251	0.21568
orf19.1441	0	Ortholog of C. dubliniensis CD36 : Cd36_16230, C. parapsilosis CDC317 : CPAR2_213950, Candida tenuis NRRL Y-1498 : CANTEDRAFT_112720 and Debaryomyces hansenii CBS767 : DEHA2A01848g	-1.07232	0.93256	0.50707
orf19.3782.2	0	Ortholog(s) have role in cristae formation and MICOS complex, mitochondrial crista junction localization	-1.07211	0.93274	0.55738
orf19.841	0	Ortholog(s) have role in Golgi vesicle transport and Golgi membrane localization	-1.07209	0.93276	0.49921
orf19.1080	0	Ortholog of C. dubliniensis CD36 : Cd36_64900, C. parapsilosis CDC317 : CPAR2_600390, Pichia stipitis Pignal : PICST_30726 and Candida guilliermondii ATCC 6260 : PGUG_04023	-1.07203	0.93281	0.8317
orf19.4640	PWP1	Putative rRNA processing protein; Hap43-induced; repressed in core stress response	-1.07198	0.93286	0.28682
orf19.2676	0	Predicted hexameric RecA-like ATPase Elp456 Elongator subcomplex subunit; required for modification of wobble nucleosides in tRNA; Spider biofilm induced	-1.07197	0.93286	0.40336
orf19.5229	0	Ortholog(s) have 3'-5'-exoribonuclease activity, Ran GTPase binding, endoribonuclease activity, tRNA binding activity	-1.07191	0.93291	0.22339
orf19.5049	0	Putative U3-containing 90S preribosome processome complex subunit; Hap43-induced gene; rat catheter and Spider biofilm induced; F-12/CO2 early biofilm induced	-1.0719	0.93293	0.21266
orf19.759	SEC21	Ortholog(s) have role in ER to Golgi vesicle-mediated transport, retrograde vesicle-mediated transport, Golgi to ER and COPI vesicle coat, endosome localization	-1.0718	0.93301	0.47465
orf19.6534.2	CRN1	Coronin; cortical actin cytoskeletal component; predicted role in regulation of actin patch assembly; rat catheter and Spider biofilm repressed	-1.07177	0.93304	0.02394
orf19.3129	0	Putative chromatin remodelling complex protein; heterozygous null mutant displays sensitivity to virgineone; Spider biofilm repressed	-1.07172	0.93308	0.23744
orf19.5237	VPH2	Ortholog(s) have role in vacuolar acidification, vacuolar proton-transporting V-type ATPase complex assembly and Vma12-Vma22 assembly complex, endoplasmic reticulum membrane localization	-1.0716	0.93318	0.06943
orf19.5230	MRPS9	Mitochondrial ribosomal protein S9; has N-terminal mitochondrial targeting signal and an S9 consensus motif; overexpression in S. cerevisiae causes respiratory defect that is reversible upon cessation of C. albicans gene expression	-1.07148	0.93329	0.37019
orf19.4931	0	Putative tRNA-Cys synthetase; induced by alpha pheromone in SpiderM medium; ribosomal subunits, translation factors, tRNA synthetases are downregulated upon phagocytosis by murine macrophage	-1.07136	0.9334	0.3801
orf19.3627	0	Ortholog of C. dubliniensis CD36 : Cd36_22640, C. parapsilosis CDC317 : CPAR2_406910, Candida tenuis NRRL Y-1498 : CANTEDRAFT_104937 and Debaryomyces hansenii CBS767 : DEHA2D02706g	-1.07122	0.93352	0.96168
orf19.2597	MRS2	Putative magnesium ion transporter, mitochondrial; fungal-specific (no human or murine homolog)	-1.07118	0.93355	0.02891
orf19.2580	HST2	Putative histone deacetylase; role in regulation of white-opaque switch; Spider biofilm induced	-1.07116	0.93357	0.21421
orf19.7019	YML6	Putative mitochondrial ribosomal protein; induced upon adherence to polystyrene	-1.07104	0.93368	0.15207
orf19.3970	0	Putative ribosome biogenesis factor; possibly essential, disruptants not obtained by UAU1 method; rat catheter and Spider biofilm induced	-1.07099	0.93371	0.97736
orf19.6496	TRS33	Putative TRAPP complex subunit; constitutive expression independent of MTL or white-opaque status	-1.07087	0.93382	0.48717
orf19.309	DAL5	Allantoate permease; nitrogen catabolite repressed, induced in absence of preferred N sources; nitrogen source regulation requires Gat1; possibly essential gene (by UAU1 method); Hap43-repressed	-1.0707	0.93397	0.6733
orf19.661	KRR1	Putative nucleolar protein; repressed benomyl treatment or in an azole-resistant strain that overexpresses MDR1; F-12/CO2 early biofilm induced	-1.07067	0.934	0.11467
orf19.6662	0	Putative coenzyme Q (ubiquinone) binding protein; transcript is upregulated in clinical isolates from HIV+ patients with oral candidiasis	-1.07063	0.93403	0.11657
orf19.2458	SIP5	Protein of unknown function; flow model, rat catheter and Spider biofilm induced	-1.07026	0.93435	0.33945
orf19.3203	RCY1	Putative F-box protein involved in endocytic membrane traffic and/or recycling; fungal-specific (no human or murine homolog)	-1.06994	0.93463	0.11338
orf19.6373	DCP2	Ortholog(s) have chromatin binding, m7G(5')pppN diphosphatase activity, mRNA binding activity	-1.06984	0.93472	0.7603
orf19.6530	0	Similar to bacterial DnaJ; transcript upregulated in low iron; flow model biofilm induced; Spider biofilm induced	-1.06978	0.93477	0.98882
orf19.992	LKH1	Putative leukotriene A(4) hydrolase; repressed during the mating process; Hog1p-induced	-1.06975	0.9348	0.54677
orf19.4785	PTC1	Putative protein phosphatase of the Type 2C-related family (serine/threonine-specific), similar to S. cerevisiae Ptc1p; mutant shows virulence defect	-1.06974	0.9348	0.20708
orf19.3166	0	Ortholog(s) have role in Golgi to endosome transport, cell morphogenesis, endoplasmic reticulum organization and endosome, mitochondrion, trans-Golgi network localization	-1.06969	0.93485	0.68628
orf19.1421	0	Ortholog(s) have ureidoglycolate lyase activity and cytosol, nucleus localization	-1.0696	0.93493	0.68725
orf19.352	0	Ortholog of C. dubliniensis CD36 : Cd36_83550, C. parapsilosis CDC317 : CPAR2_404510, Debaryomyces hansenii CBS767 : DEHA2B13794g and Pichia stipitis Pignal : PICST_30078	-1.0696	0.93493	0.12466
orf19.3789	RPL24A	Predicted ribosomal protein; downregulated upon phagocytosis by murine macrophage; intron in 5'-UTR; Hap43-induced; Spider biofilm repressed	-1.06955	0.93497	0.15823
orf19.796	HYM1	Protein of RAM cell wall integrity signaling network; involved in regulation of Ace2 activity and cellular morphogenesis; role in cell separation, azole sensitivity; required for hyphal growth	-1.06924	0.93524	0.25801
orf19.6432	0	Ortholog(s) have ATPase activity, role in response to drug, ribosomal large subunit biogenesis and cytosol, preribosome, large subunit precursor localization	-1.06909	0.93537	0.79226
orf19.5643	ECM7	Protein involved in control of calcium homeostasis and oxidative stress response; mutants show defects in hyphal growth	-1.06892	0.93552	0.36874
orf19.4219	RIX7	Putative ATPase of the AAA family; role in ribosomal subunit export from the nucleus; mutation impairs hyphal growth and biofilm formation	-1.06891	0.93553	0.35938
orf19.6863	VPH1	Vacuolar H(+)-ATPase; transcription regulated by Nrg1, Mig1, and Tup1	-1.06885	0.93558	0.26063
orf19.7209	0	Putative Rho GDP dissociation inhibitor; induced by nitric oxide independent of Yhb1p	-1.06884	0.93559	0.10983
orf19.6629	ISC1	Mitochondrial membrane localized inositol phosphosphingolipid phospholipase C; hydrolyzes complex sphingolipids to produce ceramide; mutant is viable	-1.06882	0.93561	0.62896
orf19.5991	0	Ortholog(s) have role in assembly of large subunit precursor of preribosome, maturation of 5.8S rRNA from tricistronic rRNA transcript (SSU-rRNA, 5.8S rRNA and LSU-rRNA), more	-1.06867	0.93574	0.18601
orf19.5683	0	Putative integral membrane protein of unknown function; clade-associated gene expression; Spider biofilm induced	-1.06861	0.93579	0.17999
orf19.4841	SHY1	Cytochrome c oxidase biosynthesis protein; transcript regulated by Nrg1 and Mig1	-1.06841	0.93597	0.13909
orf19.2818	0	Ortholog(s) have RNA-dependent ATPase activity, second spliceosomal transesterification activity and role in RNA exon ligation, generation of catalytic spliceosome for second transesterification step	-1.06832	0.93605	0.09462
orf19.6524	TOM40	Protein involved in mitochondrial protein import; Spider biofilm repressed	-1.06825	0.93611	0.25992
orf19.1589	0	Putative transcription factor component of the core factor (CF) rDNA transcription factor complex; Spider biofilm induced	-1.06823	0.93613	0.40809
orf19.4117	0	Ortholog of C. dubliniensis CD36 : Cd36_20450, C. parapsilosis CDC317 : CPAR2_104160, Candida tenuis NRRL Y-1498 : CANTEDRAFT_95516 and Debaryomyces hansenii CBS767 : DEHA2F05192g	-1.06823	0.93613	0.61295
orf19.3272	0	Ortholog(s) have chaperone binding activity, role in box C/D snoRNP assembly, protein folding and R2TP complex, cytoplasm, nucleus localization	-1.06821	0.93615	0.7933
orf19.3054	RPN3	Putative non-ATPase regulatory subunit of the 26S proteasome lid; amphotericin B repressed; oxidative stress-induced via Cap1p	-1.06806	0.93628	0.60475
orf19.4659	0	Ortholog(s) have RNA binding activity, role in mRNA splicing, via spliceosome and U2 snRNP, U2-type prespliceosome localization	-1.06804	0.93629	0.65455
orf19.6177	0	Protein of unknown function; Spider biofilm repressed	-1.06802	0.93631	0.6536
orf19.6902	DBP7	Putative ATP-dependent DEAD-box RNA helicase; Hap43-induced; rat catheter biofilm induced	-1.06793	0.93639	0.38783
orf19.1162	0	Protein of unknown function; transcript upregulated by benomyl treatment	-1.06787	0.93644	0.40466
orf19.1668	0	Protein of unknown function; expression downregulated in an ssr1 null mutant	-1.06779	0.93652	0.33738
orf19.204	0	Ortholog of C. dubliniensis CD36 : Cd36_23180, Candida tropicalis MYA-3404 : CTRG_01968 and Candida albicans WO-1 : CAWG_05983	-1.06771	0.93659	0.96779
orf19.6357	0	Ortholog(s) have role in activation of mitotic cell cycle spindle assembly checkpoint, mitotic DNA integrity checkpoint and mitotic spindle assembly checkpoint, more	-1.06756	0.93672	0.03805
orf19.7038	0	Ortholog(s) have phosphatidylinositol-3-phosphate binding activity, role in membrane tubulation, protein targeting to vacuole, retrograde transport, endosome to Golgi and endosome, nucleus localization	-1.06754	0.93673	0.16002
orf19.3057	0	Ortholog(s) have role in mitochondrial genome maintenance and endoplasmic reticulum localization	-1.06749	0.93678	0.33998
orf19.5977	CEM1	Protein similar to S. cerevisiae Cem1p, an acyl carrier protein involved in fatty acid biosynthesis; likely to be essential for growth, based on an insertional mutagenesis strategy	-1.06748	0.93679	0.28535
orf19.277	THI6	Putative thiamin-phosphate pyrophosphorylase, hydroxyethylthiazole kinase; fungal-specific; Spider biofilm induced	-1.06735	0.9369	0.23408
orf19.838.1	RPS9B	Predicted ribosomal protein; repressed upon phagocytosis by murine macrophage; transcript possibly regulated upon hyphal formation; Spider biofilm repressed	-1.06732	0.93692	0.76597
orf19.1033	STR2	Ortholog(s) have cystathionine gamma-synthase activity, role in transsulfuration and cytosol, nucleus localization	-1.06724	0.93699	0.09028
orf19.3844	MRP8	Mitochondrial ribosomal protein; ortholog of S. cerevisiae Mrp8; transcript induced in hyphal form; mutant is viable; flow model and rat catheter biofilm repressed	-1.06715	0.93708	0.17656
orf19.7306	0	Aldo-keto reductase; increased transcript associated with MDR1 overexpression, benomyl or long-term fluconazole treatment; overexpression does not affect drug or oxidative stress sensitivity; stationary phase enriched; flow biofim repressed	-1.06697	0.93724	0.72546
orf19.5169	0	Has domain(s) with predicted carbon-nitrogen ligase activity, with glutamine as amido-N-donor activity	-1.06687	0.93733	0.63644
orf19.5519	GCV1	Putative T subunit of glycine decarboxylase; transcript negatively regulated by Sfu1; Spider biofilm repressed	-1.06685	0.93734	0.381
orf19.2937	PMM1	Phosphomannomutase; enzyme of O- and N-linked mannosylation; interconverts mannose-6-phosphate and mannose-l-phosphate; functional homolog of S. cerevisiae Sec53; antigenic in mice; Hap43-induced; flow model and Spider biofilm repressed	-1.06684	0.93735	0.0424
orf19.3607	0	Ortholog of C. dubliniensis CD36 : Cd36_22860, C. parapsilosis CDC317 : CPAR2_806540, Candida tenuis NRRL Y-1498 : CANTEDRAFT_108823 and Debaryomyces hansenii CBS767 : DEHA2B13596g	-1.06676	0.93742	0.76702
orf19.4036	APM1	Ortholog of S. cerevisiae/S. pombe Apm1; a clathrin-associated protein complex (AP-1) subunit; phosphorylated protein; Tn mutation affects filamentous growth; Spider biofilm repressed	-1.06669	0.93748	0.64145
orf19.6343	FEN1	Putative fatty acid elongase; predicted role in sphingolipid biosynthesis; possibly an essential gene, disruptants not obtained by UAU1 method; Spider and flow model biofilm induced	-1.06635	0.93778	0.36038
orf19.6802	0	Ortholog(s) have palmitoyltransferase activity, role in protein palmitoylation, vacuole fusion, non-autophagic and Golgi apparatus, endoplasmic reticulum, fungal-type vacuole membrane localization	-1.06625	0.93786	0.47776
orf19.910	PRP3	Predicted splicing factor, component of the U4/U6-U5 snRNP complex; Hap43-induced gene; rat catheter biofilm induced	-1.06623	0.93788	0.73023
orf19.6399	ATS1	Protein required for modification of wobble nucleosides in tRNA; induced upon adherence to polystyrene; regulated by Sef1, Sfu1, and Hap43	-1.06612	0.93798	0.61126
orf19.2770	0	Ortholog of C. dubliniensis CD36 : Cd36_42220, C. parapsilosis CDC317 : CPAR2_500340, Debaryomyces hansenii CBS767 : DEHA2G17754g and Pichia stipitis Pignal : PICST_31424	-1.0661	0.938	0.57087
orf19.4413	CMD1	Calmodulin; calmodulin inhibitors cause a defect in hyphal growth; transcript not regulated by yeast-hyphal transition; mutation confers hypersensitivity to cytochalasin D and high concentrations of tunicamycin; gene has intron	-1.06602	0.93807	0.66574
orf19.4771	0	Protein of unknown function; Spider biofilm induced	-1.06598	0.93811	0.1023
orf19.4537	0	Ortholog(s) have RNA polymerase II core binding, RNA polymerase II regulatory region DNA binding, transcription factor activity, core RNA polymerase II recruiting activity	-1.06596	0.93812	0.26869
orf19.5953	SFP1	C2H2 transcription factor involved in regulation of biofilm formation; rat catheter biofilm induced	-1.06594	0.93814	0.74288
orf19.3010	0	Putative lipoyl ligase; role in modification of mitochondrial enzymes by attachment of lipoic acid groups; rat catheter biofilm induced	-1.06592	0.93815	0.15639
orf19.1195	0	Ortholog(s) have metalloendopeptidase activity, role in cellular iron ion homeostasis, protein processing involved in protein targeting to mitochondrion, protein stabilization and mitochondrial matrix localization	-1.06591	0.93817	0.23173
orf19.1237	ARO9	Aromatic transaminase; Ehrlich fusel oil pathway of aromatic alcohol biosynthesis; Rim101-dependent pH-regulation (alkaline induced); Hap43-induced gene	-1.06584	0.93823	0.79519
orf19.3806	0	Ortholog(s) have role in negative regulation of gluconeogenesis, proteasome-mediated ubiquitin-dependent protein catabolic process, traversing start control point of mitotic cell cycle and GID complex, cytoplasm, nucleus localization	-1.06584	0.93822	0.52613
orf19.5318	RAD1	Putative single-stranded DNA endonuclease; transcript regulated by Nrg1; macrophage-induced gene	-1.06584	0.93823	0.11526
orf19.481	GCD1	Putative translation initiation factor; transcript regulated by Mig1; repressed upon phagocytosis by murine macrophage	-1.06577	0.93829	0.50746
orf19.708	0	Ortholog(s) have structural constituent of cytoskeleton activity	-1.06573	0.93832	0.71121
orf19.3546	PEX2	Ortholog(s) have ubiquitin-protein transferase activity, role in protein import into peroxisome matrix, protein polyubiquitination and peroxisomal importomer complex, peroxisomal membrane localization	-1.06567	0.93838	0.68739
orf19.6403	0	Ortholog(s) have adenyl-nucleotide exchange factor activity, role in SRP-dependent cotranslational protein targeting to membrane, translocation and endoplasmic reticulum localization	-1.06564	0.9384	0.28766
orf19.1759	PHO23	Ortholog(s) have methylated histone binding activity	-1.06562	0.93842	0.17046
orf19.1083	0	Putative protein of unknown function; macrophage-induced gene	-1.06548	0.93854	0.58209
orf19.6457	0	Ortholog of S. cerevisiae : YBL086C, C. glabrata CBS138 : CAGL0C01815g, C. dubliniensis CD36 : Cd36_72270, C. parapsilosis CDC317 : CPAR2_702850 and Candida tenuis NRRL Y-1498 : CANTEDRAFT_107537	-1.0654	0.93862	0.88605
orf19.1957	CYC3	Mitochondrial cytochrome c heme lyase; antigenic cell-wall protein; filament induced; induced on polystyrene adherence, interaction with macrophage; N-glycosylation, 2 heme-binding motifs; rat catheter, Spider biofilm induced	-1.06537	0.93864	0.07609
orf19.4931.1	RPL14	Ribosomal protein L14; promoter bound directly by Tbf1p; Hap43p-induced gene	-1.06531	0.93869	0.47135
orf19.900	NSP1	Essential component of the nuclear pore complex; sumoylation target; stationary phase enriched protein; rat catheter biofilm repressed	-1.06528	0.93872	0.88502
orf19.1996	CHA1	Similar to catabolic ser/thr dehydratases; repressed by Rim101; induced in low iron; regulated on white-opaque switch; filament induced; Tn mutation affects filamentation; flow model biofilm induced; Spider biofilm repressed	-1.06517	0.93881	0.35986
orf19.7254	0	Ortholog(s) have role in mRNA metabolic process, mitochondrial translational initiation and extrinsic component of membrane, mitochondrial inner membrane localization	-1.06513	0.93885	0.71236
orf19.7286	RPN7	Subunit of the proteasome regulatory particle; regulated by Gcn2p and Gcn4p; protein present in exponential and stationary growth phase yeast cultures	-1.06511	0.93887	0.66699
orf19.1428	DUO1	Subunit of the Dam1 (DASH) complex, which acts in chromosome segregation by coupling kinetochores to spindle microtubules	-1.0651	0.93888	0.24426
orf19.1686	0	Ortholog(s) have mitochondrion localization	-1.06508	0.9389	0.43363
orf19.3628	RSP5	Putative NEDD4 family E3 ubiquitin ligase; induced during infection of murine kidney, compared to growth in vitro; has murine homolog; possibly an essential gene, disruptants not obtained by UAU1 method	-1.06495	0.93901	0.42499
orf19.1078	HBR2	Putative alanine glyoxylate aminotransferase; regulated by Gcn4p and hemoglobin; stationary phase enriched protein	-1.06485	0.9391	0.98124
orf19.3376	0	Ortholog of Candida albicans WO-1 : CAWG_03459	-1.06482	0.93912	0.76832
orf19.2247	0	Ortholog of C. parapsilosis CDC317 : CPAR2_406700, C. dubliniensis CD36 : Cd36_21220, Candida tenuis NRRL Y-1498 : CANTEDRAFT_127772 and Candida orthopsilosis Co 90-125 : CORT_0C06120	-1.06446	0.93945	0.74181
orf19.2343.1	0	Putative vacuolar H+ ATPase subunit e of the V-ATPase V0 subcomplex; added to Assembly 21 based on comparative genome analysis	-1.06441	0.93949	0.70788
orf19.3954	PSD2	Ortholog(s) have phosphatidylserine decarboxylase activity, role in phosphatidylcholine biosynthetic process and cell division site, cytosol, endosome localization	-1.06437	0.93952	0.58057
orf19.7384	NOG1	Putative GTPase; mutation confers hypersensitivity to 5-fluorocytosine (5-FC), 5-fluorouracil (5-FU), and tubercidin (7-deazaadenosine); repressed by prostaglandins; Hap43-induced	-1.06429	0.93959	0.57552
orf19.5996.1	RPS19A	Putative ribosomal protein S19; protein level decreases in stationary phase cultures; Spider biofilm repressed	-1.06425	0.93963	0.2992
orf19.5588	PGA60	Putative GPI-anchored adhesin-like protein; hyphal-induced expression	-1.06422	0.93966	0.92125
orf19.2014	BCY1	Protein kinase A regulatory subunit; required for nuclear localization of Tpk1; physically interacts with Tpk1; essential; apoptosis-regulated; bcy1 heterozygous or bcy1 tpk2 mutant has filamentous growth defect	-1.06419	0.93968	0.74718
orf19.5839	PDR17	Fungal-specific protein (no human or murine homolog); role in sensitivity to fluconazole, specifically	-1.06413	0.93973	0.67869
orf19.4488	0	Predicted ortholog of S. cerevisiae Swi3, subunit of the SWI/SNF chromatin remodeling complex; possibly an essential gene, disruptants not obtained by UAU1 method	-1.06412	0.93974	0.52194
orf19.2360	URA2	Putative bifunctional carbamoylphosphate synthetase-aspartate transcarbamylase; flucytosine induced; macrophage/pseudohyphal-induced; 5'-UTR intron; flow model biofilm repressed	-1.06407	0.93978	0.70139
orf19.7325	SCO1	Putative copper transporter; Hap43p-repressed gene	-1.06405	0.9398	0.63161
orf19.2582	0	Ortholog(s) have mRNA binding, ribosomal large subunit binding, tRNA binding activity and role in peptide biosynthetic process, ribosome-associated ubiquitin-dependent protein catabolic process	-1.06403	0.93982	0.53483
orf19.384	0	Ortholog(s) have Golgi apparatus, cytosol, nucleus localization	-1.06398	0.93987	0.21113
orf19.2229	0	Ortholog(s) have ubiquitin-protein transferase activity, role in protein ubiquitination, response to ethanol, septin ring assembly and cytoplasm, nucleus localization	-1.0639	0.93994	0.11433
orf19.5869	0	Ortholog(s) have role in metal ion transport, protein targeting to vacuole, ubiquitin-dependent protein catabolic process and endoplasmic reticulum, fungal-type vacuole membrane localization	-1.06384	0.93999	0.94824
orf19.1185	0	Ortholog(s) have ubiquitin-protein transferase activity	-1.06378	0.94005	0.35323
orf19.816	DCK2	Protein similar to S. cerevisiae Ylr422wp; transposon mutation affects filamentous growth; induced by Mnl1p under weak acid stress	-1.06374	0.94008	0.797
orf19.7546	0	Protein involved in rRNA processing; required for maturation of the 35S primary transcript of pre-rRNA and for cleavage leading to mature 18S rRNA; Spider biofilm induced	-1.06361	0.9402	0.72177
orf19.4583	0	Protein with a mitochondrial carrier protein domain; possibly an essential gene, disruptants not obtained by UAU1 method; Spider biofilm repressed	-1.0636	0.9402	0.43484
orf19.3344	VPS17	Ortholog(s) have phosphatidylinositol-3-phosphate binding, protein transporter activity and role in ascospore-type prospore membrane assembly, intracellular protein transport, retrograde transport, endosome to Golgi	-1.06355	0.94024	0.74208
orf19.5067	0	Predicted nuclear exosome-associated nucleic acid binding protein; rat catheter and Spider biofilm induced	-1.06346	0.94032	0.34808
orf19.1200	0	Protein of unknown function; Spider biofilm induced	-1.06335	0.94042	0.61412
orf19.1221	ALG2	Putative mannosyltransferase involved in cell wall mannan biosynthesis; transcription is elevated in chk1, nik1, and sln1 homozygous null mutants	-1.06335	0.94042	0.74894
orf19.73	0	Putative metalloprotease; associates with ribosomes and is involved in ribosome biogenesis; Spider biofilm induced	-1.06332	0.94045	0.54839
orf19.3862	0	Putative intracellular transport protein; heterozygous null mutant displays sensitivity to rapamycin; expression upregulated during growth in the mouse cecum	-1.0633	0.94046	0.7362
orf19.6597	0	Ortholog(s) have cytoplasm localization	-1.0633	0.94047	0.46123
orf19.5534	0	Protein with a predicted role in mitotic spindle elongation, vesicle-mediated transport; flow model biofilm induced	-1.06309	0.94065	0.79672
orf19.4411	HOS1	Histone deacetylase; similar to S. cerevisiae Hos1; has conserved deacetylation motif; slightly greater expression in white cells than in opaque cells	-1.063	0.94073	0.81098
orf19.5851	STE13	Putative pheromone-processing dipeptidyl aminopeptidase; possible Kex2 substrate; transposon mutation affects filamentous growth; induced by low nitrogen, germ tube formation; flow model biofilm repressed	-1.06299	0.94074	0.94663
orf19.1219	0	Ortholog of Spathaspora passalidarum NRRL Y-27907 : SPAPADRAFT_149713	-1.06295	0.94078	0.56359
orf19.6971	DIE2	Ortholog(s) have dolichyl-phosphate-glucose-glycolipid alpha-glucosyltransferase activity, role in protein N-linked glycosylation and endoplasmic reticulum membrane localization	-1.06295	0.94078	0.13322
orf19.3177	0	Ortholog(s) have 2,5-diamino-6-ribitylamino-4(3H)-pyrimidinone 5'-phosphate deaminase activity, pseudouridine synthase activity, role in riboflavin biosynthetic process, tRNA pseudouridine synthesis and cytosol localization	-1.06289	0.94084	0.96355
orf19.6638	PTC4	Type PP2C serine/threonine phosphatase; localized to mitochondria; mutation causes sensitivity to sodium, potassium and azole drugs; decreased expression in hyphae compared to yeast-form cells	-1.06285	0.94087	0.49161
orf19.728	TSC11	Protein similar to S. cerevisiae Tsc11p which is involved in sphingolipid biosynthesis; transposon mutation affects filamentous growth	-1.0628	0.94091	0.66999
orf19.5619	0	Protein of unknown function; induced by alpha pheromone in SpiderM medium; Spider biofilm induced	-1.06271	0.94099	0.26304
orf19.5507	ENP1	Protein required for pre-rRNA processing and 40S ribosomal subunit synthesis; associated with U3 and U14 snoRNAs; transposon mutation affects filamentous growth; repressed by prostaglandins; Spider biofilm induced	-1.06269	0.94101	0.32529
orf19.2887	0	Ortholog in S. cerevisiae is localizedto the bud, mating projection tip, and associates with ribosomes; Spider biofilm induced	-1.06266	0.94103	0.30949
orf19.666	0	Essential protein required for the DNA integrity checkpoint pathway; Spider biofilm induced	-1.06263	0.94106	0.22327
orf19.2199	PHO86	Putative endoplasmic reticulum protein; possibly adherence-induced	-1.06258	0.94111	0.57192
orf19.1864	0	Ortholog(s) have role in ribosome-associated ubiquitin-dependent protein catabolic process and RQC complex, cytosol, cytosolic large ribosomal subunit localization	-1.06255	0.94113	0.59043
orf19.3281	0	Ortholog(s) have histone demethylase activity (H3-K36 specific), methylated histone binding activity and role in histone demethylation, positive regulation of transcription elongation from RNA polymerase II promoter	-1.0625	0.94118	0.92807
orf19.5949	FAS2	Alpha subunit of fatty-acid synthase; required for virulence in mouse systemic infection and rat oropharyngeal infection models; regulated by Efg1; fluconazole-induced; amphotericin B repressed; flow model and Spider biofilm repressed	-1.0625	0.94117	0.30659
orf19.48	RPM2	Mitochondrial RNase P subunit; roles in nuclear transcription, cytoplasmic and mitochondrial RNA processing, mitochondrial translation; virulence-group-correlated expression; likely essential (UAU1 method); rat catheter biofilm induced	-1.06248	0.94119	0.37568
orf19.685.1	0	Ortholog of C. parapsilosis CDC317 : CPAR2_602135, Candida tenuis NRRL Y-1498 : cten_CGOB_00042, Debaryomyces hansenii CBS767 : DEHA2F11858g and Pichia stipitis Pignal : PICST_60705	-1.06247	0.9412	0.92266
orf19.5089	TERT	Telomerase reverse transcriptase; catalytic protein subunit of telomere synthesis; essential for telomerase activity; has telomerase-specific motif T and other conserved reverse transcriptase motifs	-1.0624	0.94127	0.60761
orf19.3831	0	Ortholog(s) have enzyme activator activity, telomerase inhibitor activity, role in box C/D snoRNA 3'-end processing, negative regulation of telomere maintenance via telomerase and nucleolus, nucleoplasm localization	-1.06237	0.94129	0.69939
orf19.1481	HAP42	Predicted transcription factor; possibly an essential gene, disruptants not obtained by UAU1 method	-1.06228	0.94137	0.15305
orf19.5360	RPC11	Putative RNA polymerase III subunit C11; repressed in core caspofungin response; Spider biofilm induced	-1.06226	0.94139	0.41804
[truncated: 4,087 more rows]
